# Supplementary material for: Key circular RNAs identified in male osteoporosis patients by whole transcriptome sequencing
Source: PeerJ journal article supplement (doi:10.7717/peerj.11420), 2021-05-26
Supplement: supplementary_file.zip [file supplementary_file.zip]

GO_accession	Description	Term_type	Over_represented_pValue	Corrected_pValue	DEG_item	DEG_list	Bg_item	Bg_list	Gene_names
GO:0005515	protein binding	molecular_function	1.8047e-18	3.8315e-14	738	1033	11474	19500	ENSG00000133138,ENSG00000160570,ENSG00000100298,ENSG00000158321,ENSG00000167613,ENSG00000198246,ENSG00000101109,ENSG00000127511,ENSG00000141522,ENSG00000071054,ENSG00000113742,ENSG00000148335,ENSG00000099991,ENSG00000137497,ENSG00000205531,ENSG00000071127,ENSG00000121753,ENSG00000127527,ENSG00000167770,ENSG00000140961,ENSG00000103056,ENSG00000186827,ENSG00000186184,ENSG00000122390,ENSG00000139626…
GO:0044446	intracellular organelle part	cellular_component	4.5242e-14	4.0419e-10	591	1033	8988	19500	ENSG00000141933,ENSG00000162517,ENSG00000079805,ENSG00000163812,ENSG00000100246,ENSG00000161217,ENSG00000181722,ENSG00000130733,ENSG00000166938,ENSG00000135924,ENSG00000149923,ENSG00000135916,ENSG00000129071,ENSG00000197043,ENSG00000074370,ENSG00000070770,ENSG00000197299,ENSG00000100139,ENSG00000137880,ENSG00000149131,ENSG00000158773,ENSG00000079819,ENSG00000185825,ENSG00000185024,ENSG00000113758…
GO:0044422	organelle part	cellular_component	5.7113e-14	4.0419e-10	602	1033	9205	19500	ENSG00000140474,ENSG00000198945,ENSG00000143882,ENSG00000166394,ENSG00000102100,ENSG00000108592,ENSG00000054116,ENSG00000169180,ENSG00000176087,ENSG00000126091,ENSG00000148824,ENSG00000145740,ENSG00000124688,ENSG00000214022,ENSG00000179335,ENSG00000172534,ENSG00000141551,ENSG00000071564,ENSG00000166169,ENSG00000181830,ENSG00000197976,ENSG00000072310,ENSG00000161513,ENSG00000170315,ENSG00000136699…
GO:0044424	intracellular part	cellular_component	1.6076e-13	8.533e-10	852	1033	14273	19500	ENSG00000187446,ENSG00000137073,ENSG00000178719,ENSG00000131446,ENSG00000101294,ENSG00000137171,ENSG00000130305,ENSG00000181218,ENSG00000172888,ENSG00000125347,ENSG00000167797,ENSG00000158089,ENSG00000106608,ENSG00000129657,ENSG00000135124,ENSG00000072609,ENSG00000072163,ENSG00000185215,ENSG00000172667,ENSG00000197879,ENSG00000173715,ENSG00000173020,ENSG00000156587,ENSG00000204392,ENSG00000169727…
GO:0005622	intracellular	cellular_component	4.2419e-13	1.8012e-09	866	1033	14614	19500	ENSG00000175854,ENSG00000182670,ENSG00000165782,ENSG00000167977,ENSG00000100721,ENSG00000100151,ENSG00000174871,ENSG00000160691,ENSG00000184014,ENSG00000113068,ENSG00000071051,ENSG00000067596,ENSG00000073331,ENSG00000175787,ENSG00000159788,ENSG00000198563,ENSG00000136802,ENSG00000125449,ENSG00000127415,ENSG00000054967,ENSG00000180448,ENSG00000173327,ENSG00000158062,ENSG00000026751,ENSG00000125447…
GO:0005488	binding	molecular_function	1.7129e-12	6.0609e-09	879	1033	14952	19500	ENSG00000197696,ENSG00000179364,ENSG00000090339,ENSG00000233198,ENSG00000197299,ENSG00000110651,ENSG00000135916,ENSG00000149923,ENSG00000171159,ENSG00000160991,ENSG00000129071,ENSG00000197043,ENSG00000168918,ENSG00000070770,ENSG00000074370,ENSG00000047230,ENSG00000154102,ENSG00000163703,ENSG00000135924,ENSG00000166938,ENSG00000130733,ENSG00000162517,ENSG00000141933,ENSG00000100246,ENSG00000161217…
GO:0005737	cytoplasm	cellular_component	4.5962e-12	1.394e-08	705	1033	11384	19500	ENSG00000166548,ENSG00000123179,ENSG00000185130,ENSG00000162298,ENSG00000010318,ENSG00000158796,ENSG00000084207,ENSG00000221968,ENSG00000181045,ENSG00000146054,ENSG00000128309,ENSG00000162144,ENSG00000197119,ENSG00000197785,ENSG00000108515,ENSG00000275700,ENSG00000092841,ENSG00000069424,ENSG00000102893,ENSG00000185236,ENSG00000059145,ENSG00000172432,ENSG00000157593,ENSG00000154743,ENSG00000187954…
GO:0003674	molecular_function	molecular_function	1.1167e-11	2.9636e-08	985	1033	17509	19500	ENSG00000157895,ENSG00000071889,ENSG00000092871,ENSG00000100023,ENSG00000116786,ENSG00000107745,ENSG00000213923,ENSG00000174586,ENSG00000117682,ENSG00000171747,ENSG00000064601,ENSG00000117308,ENSG00000176058,ENSG00000125970,ENSG00000142959,ENSG00000181396,ENSG00000226124,ENSG00000005075,ENSG00000172757,ENSG00000102882,ENSG00000132510,ENSG00000166526,ENSG00000240505,ENSG00000196588,ENSG00000073060…
GO:0043229	intracellular organelle	cellular_component	6.8105e-11	1.6066e-07	754	1033	12485	19500	ENSG00000183160,ENSG00000108953,ENSG00000144488,ENSG00000140564,ENSG00000130725,ENSG00000204673,ENSG00000061273,ENSG00000102125,ENSG00000086102,ENSG00000106976,ENSG00000142409,ENSG00000139613,ENSG00000103056,ENSG00000186184,ENSG00000122390,ENSG00000007541,ENSG00000150967,ENSG00000183617,ENSG00000066422,ENSG00000099991,ENSG00000113742,ENSG00000148335,ENSG00000137497,ENSG00000205531,ENSG00000071127…
GO:0043226	organelle	cellular_component	8.6286e-11	1.8319e-07	790	1033	13229	19500	ENSG00000198825,ENSG00000052749,ENSG00000175866,ENSG00000172057,ENSG00000214063,ENSG00000145214,ENSG00000103066,ENSG00000052344,ENSG00000128185,ENSG00000147533,ENSG00000174775,ENSG00000166925,ENSG00000100897,ENSG00000167815,ENSG00000110931,ENSG00000168003,ENSG00000213619,ENSG00000104894,ENSG00000087903,ENSG00000167851,ENSG00000087269,ENSG00000184900,ENSG00000167395,ENSG00000196576,ENSG00000011243…
GO:0043231	intracellular membrane-bounded organelle	cellular_component	3.3261e-10	6.4197e-07	696	1033	11405	19500	ENSG00000108953,ENSG00000183160,ENSG00000061273,ENSG00000204673,ENSG00000130725,ENSG00000140564,ENSG00000106976,ENSG00000086102,ENSG00000102125,ENSG00000139613,ENSG00000142409,ENSG00000103056,ENSG00000122390,ENSG00000186184,ENSG00000150967,ENSG00000183617,ENSG00000007541,ENSG00000113742,ENSG00000148335,ENSG00000066422,ENSG00000099991,ENSG00000205531,ENSG00000137497,ENSG00000127527,ENSG00000167770…
GO:0043227	membrane-bounded organelle	cellular_component	2.9956e-09	5.1204e-06	730	1033	12188	19500	ENSG00000072609,ENSG00000135124,ENSG00000129657,ENSG00000072163,ENSG00000172667,ENSG00000197879,ENSG00000204392,ENSG00000156587,ENSG00000169727,ENSG00000132952,ENSG00000154781,ENSG00000040487,ENSG00000137496,ENSG00000187446,ENSG00000137073,ENSG00000178719,ENSG00000131446,ENSG00000101294,ENSG00000130305,ENSG00000181218,ENSG00000125347,ENSG00000167797,ENSG00000106608,ENSG00000158089,ENSG00000172888…
GO:0044444	cytoplasmic part	cellular_component	3.1353e-09	5.1204e-06	592	1033	9512	19500	ENSG00000068971,ENSG00000125445,ENSG00000165699,ENSG00000156026,ENSG00000164362,ENSG00000135506,ENSG00000164308,ENSG00000014216,ENSG00000088325,ENSG00000174886,ENSG00000089053,ENSG00000162236,ENSG00000100242,ENSG00000165802,ENSG00000105507,ENSG00000095321,ENSG00000135441,ENSG00000168071,ENSG00000132819,ENSG00000166851,ENSG00000182871,ENSG00000110786,ENSG00000178809,ENSG00000106992,ENSG00000183172…
GO:0031090	organelle membrane	cellular_component	7.9584e-09	1.2069e-05	248	1033	3398	19500	ENSG00000186642,ENSG00000140990,ENSG00000090581,ENSG00000100321,ENSG00000130204,ENSG00000050426,ENSG00000149792,ENSG00000141551,ENSG00000107862,ENSG00000181830,ENSG00000091732,ENSG00000102898,ENSG00000161513,ENSG00000011422,ENSG00000197912,ENSG00000119227,ENSG00000154118,ENSG00000169692,ENSG00000170315,ENSG00000136699,ENSG00000015285,ENSG00000215021,ENSG00000099904,ENSG00000182768,ENSG00000085872…
GO:0070013	intracellular organelle lumen	cellular_component	1.2367e-08	1.667e-05	339	1033	4972	19500	ENSG00000171298,ENSG00000266173,ENSG00000072506,ENSG00000068903,ENSG00000100116,ENSG00000143382,ENSG00000100207,ENSG00000065618,ENSG00000043143,ENSG00000168883,ENSG00000100478,ENSG00000176261,ENSG00000167548,ENSG00000011485,ENSG00000117385,ENSG00000108963,ENSG00000196275,ENSG00000130165,ENSG00000146674,ENSG00000157227,ENSG00000042493,ENSG00000196588,ENSG00000173039,ENSG00000172757,ENSG00000132510…
GO:0044428	nuclear part	cellular_component	1.2563e-08	1.667e-05	308	1033	4435	19500	ENSG00000213658,ENSG00000042493,ENSG00000167548,ENSG00000011485,ENSG00000108963,ENSG00000196275,ENSG00000130165,ENSG00000100207,ENSG00000064419,ENSG00000168883,ENSG00000043143,ENSG00000176261,ENSG00000266173,ENSG00000068903,ENSG00000100116,ENSG00000125970,ENSG00000149091,ENSG00000064601,ENSG00000168488,ENSG00000100023,ENSG00000213923,ENSG00000110801,ENSG00000092871,ENSG00000189060,ENSG00000185324…
GO:0043233	organelle lumen	cellular_component	1.5672e-08	1.9573e-05	347	1033	5123	19500	ENSG00000128309,ENSG00000197785,ENSG00000169180,ENSG00000214022,ENSG00000275700,ENSG00000124688,ENSG00000172432,ENSG00000145740,ENSG00000148824,ENSG00000166548,ENSG00000185130,ENSG00000158796,ENSG00000169976,ENSG00000162298,ENSG00000010318,ENSG00000181045,ENSG00000084207,ENSG00000108592,ENSG00000198945,ENSG00000072310,ENSG00000197976,ENSG00000120875,ENSG00000205323,ENSG00000085872,ENSG00000114353…
GO:0031974	membrane-enclosed lumen	cellular_component	1.7182e-08	2.0267e-05	350	1033	5180	19500	ENSG00000185339,ENSG00000248098,ENSG00000156990,ENSG00000080603,ENSG00000047056,ENSG00000136143,ENSG00000177192,ENSG00000107077,ENSG00000141696,ENSG00000123064,ENSG00000132780,ENSG00000204371,ENSG00000187778,ENSG00000085185,ENSG00000077514,ENSG00000099290,ENSG00000274897,ENSG00000172888,ENSG00000125347,ENSG00000107338,ENSG00000181218,ENSG00000162385,ENSG00000130305,ENSG00000105323,ENSG00000132716…
GO:0031981	nuclear lumen	cellular_component	5.6141e-08	6.2733e-05	283	1033	4072	19500	ENSG00000139613,ENSG00000065268,ENSG00000106462,ENSG00000086102,ENSG00000106976,ENSG00000140464,ENSG00000061273,ENSG00000204673,ENSG00000130725,ENSG00000185917,ENSG00000146232,ENSG00000116350,ENSG00000152457,ENSG00000005436,ENSG00000186184,ENSG00000054654,ENSG00000134283,ENSG00000175482,ENSG00000167770,ENSG00000096384,ENSG00000082898,ENSG00000148737,ENSG00000105298,ENSG00000137497,ENSG00000164687…
GO:0045296	cadherin binding	molecular_function	5.9152e-08	6.2793e-05	40	1033	299	19500	ENSG00000125449,ENSG00000167110,ENSG00000142186,ENSG00000100139,ENSG00000096384,ENSG00000168003,ENSG00000148341,ENSG00000127527,ENSG00000113758,ENSG00000108518,ENSG00000143375,ENSG00000168488,ENSG00000011009,ENSG00000149925,ENSG00000085733,ENSG00000175866,ENSG00000185236,ENSG00000162236,ENSG00000108953,ENSG00000141551,ENSG00000172534,ENSG00000128283,ENSG00000184640,ENSG00000135124,ENSG00000149782…
GO:0032991	macromolecular complex	cellular_component	8.6617e-08	8.757e-05	365	1033	5525	19500	ENSG00000215021,ENSG00000204351,ENSG00000205323,ENSG00000196169,ENSG00000114353,ENSG00000132518,ENSG00000102898,ENSG00000167460,ENSG00000126216,ENSG00000107331,ENSG00000072310,ENSG00000197976,ENSG00000065361,ENSG00000149782,ENSG00000125826,ENSG00000140990,ENSG00000154743,ENSG00000172534,ENSG00000149428,ENSG00000149792,ENSG00000071564,ENSG00000136717,ENSG00000004478,ENSG00000141551,ENSG00000092841…
GO:0009056	catabolic process	biological_process	9.3006e-08	8.9755e-05	181	1033	2387	19500	ENSG00000103056,ENSG00000196998,ENSG00000179364,ENSG00000100300,ENSG00000168890,ENSG00000110651,ENSG00000129071,ENSG00000179526,ENSG00000133612,ENSG00000187045,ENSG00000196924,ENSG00000070770,ENSG00000173821,ENSG00000048028,ENSG00000140564,ENSG00000166938,ENSG00000135924,ENSG00000140464,ENSG00000168397,ENSG00000071539,ENSG00000127948,ENSG00000160570,ENSG00000006007,ENSG00000179134,ENSG00000100298…
GO:0003824	catalytic activity	molecular_function	1.5771e-07	0.00014558	392	1033	6038	19500	ENSG00000244038,ENSG00000100142,ENSG00000197299,ENSG00000142002,ENSG00000126458,ENSG00000129071,ENSG00000149923,ENSG00000074370,ENSG00000070770,ENSG00000011243,ENSG00000047230,ENSG00000168918,ENSG00000048028,ENSG00000173821,ENSG00000166986,ENSG00000166938,ENSG00000168397,ENSG00000163349,ENSG00000162517,ENSG00000141933,ENSG00000161217,ENSG00000100246,ENSG00000079805,ENSG00000163812,ENSG00000167815…
GO:0010646	regulation of cell communication	biological_process	1.8884e-07	0.00016165	247	1033	3512	19500	ENSG00000167895,ENSG00000167851,ENSG00000164687,ENSG00000137497,ENSG00000014164,ENSG00000102225,ENSG00000113758,ENSG00000159445,ENSG00000140961,ENSG00000127527,ENSG00000071205,ENSG00000185825,ENSG00000104814,ENSG00000110931,ENSG00000096384,ENSG00000141968,ENSG00000105298,ENSG00000213619,ENSG00000148737,ENSG00000158321,ENSG00000135100,ENSG00000124160,ENSG00000187486,ENSG00000160570,ENSG00000174775…
GO:0005829	cytosol	cellular_component	1.9035e-07	0.00016165	333	1033	5000	19500	ENSG00000134283,ENSG00000105327,ENSG00000135912,ENSG00000143774,ENSG00000083454,ENSG00000005436,ENSG00000179526,ENSG00000146232,ENSG00000108953,ENSG00000140464,ENSG00000171552,ENSG00000061273,ENSG00000204673,ENSG00000130725,ENSG00000109854,ENSG00000142330,ENSG00000102125,ENSG00000086102,ENSG00000166387,ENSG00000124570,ENSG00000063245,ENSG00000167792,ENSG00000167468,ENSG00000143845,ENSG00000259431…
GO:0006996	organelle organization	biological_process	3.0181e-07	0.00024645	258	1033	3721	19500	ENSG00000100151,ENSG00000132694,ENSG00000071051,ENSG00000006695,ENSG00000113068,ENSG00000177169,ENSG00000160691,ENSG00000032742,ENSG00000112655,ENSG00000174871,ENSG00000131504,ENSG00000110200,ENSG00000137309,ENSG00000179057,ENSG00000138757,ENSG00000102879,ENSG00000160685,ENSG00000182199,ENSG00000087274,ENSG00000158941,ENSG00000203814,ENSG00000129219,ENSG00000139437,ENSG00000087586,ENSG00000143546…
GO:0048583	regulation of response to stimulus	biological_process	3.6478e-07	0.00028645	283	1033	4160	19500	ENSG00000135299,ENSG00000213654,ENSG00000099331,ENSG00000204371,ENSG00000178752,ENSG00000187147,ENSG00000129757,ENSG00000141480,ENSG00000109083,ENSG00000185527,ENSG00000136305,ENSG00000204345,ENSG00000170801,ENSG00000169727,ENSG00000175505,ENSG00000042753,ENSG00000239282,ENSG00000135124,ENSG00000129657,ENSG00000173020,ENSG00000105701,ENSG00000136279,ENSG00000197879,ENSG00000072163,ENSG00000166900…
GO:0036094	small molecule binding	molecular_function	3.7778e-07	0.00028645	181	1033	2439	19500	ENSG00000143554,ENSG00000100605,ENSG00000102225,ENSG00000164687,ENSG00000167851,ENSG00000137880,ENSG00000096384,ENSG00000104814,ENSG00000110931,ENSG00000167792,ENSG00000174775,ENSG00000127948,ENSG00000011376,ENSG00000187486,ENSG00000166592,ENSG00000143845,ENSG00000160211,ENSG00000145214,ENSG00000101109,ENSG00000008130,ENSG00000103502,ENSG00000141522,ENSG00000007174,ENSG00000071054,ENSG00000017260…
GO:0005634	nucleus	cellular_component	4.1122e-07	0.00030105	455	1033	7235	19500	ENSG00000164362,ENSG00000140332,ENSG00000005238,ENSG00000149927,ENSG00000165699,ENSG00000059758,ENSG00000108518,ENSG00000258947,ENSG00000124444,ENSG00000160789,ENSG00000089053,ENSG00000148143,ENSG00000028277,ENSG00000113648,ENSG00000088325,ENSG00000108883,ENSG00000077463,ENSG00000159479,ENSG00000102901,ENSG00000005801,ENSG00000165802,ENSG00000100242,ENSG00000182872,ENSG00000122965,ENSG00000106245…
GO:0009894	regulation of catabolic process	biological_process	1.2368e-06	0.00087531	72	1033	767	19500	ENSG00000188186,ENSG00000169242,ENSG00000160948,ENSG00000123384,ENSG00000068903,ENSG00000079999,ENSG00000123159,ENSG00000133317,ENSG00000072609,ENSG00000116670,ENSG00000158941,ENSG00000148356,ENSG00000167965,ENSG00000120899,ENSG00000087586,ENSG00000112561,ENSG00000110200,ENSG00000102882,ENSG00000117410,ENSG00000087088,ENSG00000077463,ENSG00000171130,ENSG00000173039,ENSG00000204371,ENSG00000073060…
GO:0098588	bounding membrane of organelle	cellular_component	1.3322e-06	0.00091238	192	1033	2641	19500	ENSG00000215021,ENSG00000085872,ENSG00000132518,ENSG00000102898,ENSG00000011422,ENSG00000119227,ENSG00000154118,ENSG00000170315,ENSG00000136699,ENSG00000169692,ENSG00000107331,ENSG00000005486,ENSG00000072310,ENSG00000134824,ENSG00000108639,ENSG00000054356,ENSG00000090581,ENSG00000100321,ENSG00000130204,ENSG00000186642,ENSG00000181830,ENSG00000107862,ENSG00000050426,ENSG00000141551,ENSG00000069424…
GO:2001233	regulation of apoptotic signaling pathway	biological_process	2.1214e-06	0.0014075	44	1033	392	19500	ENSG00000068001,ENSG00000162298,ENSG00000185825,ENSG00000084207,ENSG00000137275,ENSG00000213619,ENSG00000148737,ENSG00000101266,ENSG00000173039,ENSG00000129465,ENSG00000167895,ENSG00000087088,ENSG00000196588,ENSG00000160789,ENSG00000101109,ENSG00000136305,ENSG00000071051,ENSG00000085733,ENSG00000164362,ENSG00000141480,ENSG00000160570,ENSG00000092871,ENSG00000185499,ENSG00000122641,ENSG00000125826…
GO:0043234	protein complex	cellular_component	2.2315e-06	0.0014357	298	1033	4465	19500	ENSG00000138031,ENSG00000104783,ENSG00000005075,ENSG00000005844,ENSG00000161203,ENSG00000117410,ENSG00000087088,ENSG00000089820,ENSG00000173039,ENSG00000137275,ENSG00000185324,ENSG00000092871,ENSG00000110801,ENSG00000189060,ENSG00000107745,ENSG00000099814,ENSG00000142959,ENSG00000049089,ENSG00000188186,ENSG00000072506,ENSG00000068903,ENSG00000141506,ENSG00000176261,ENSG00000105700,ENSG00000043143…
GO:0000166	nucleotide binding	molecular_function	2.6934e-06	0.0016819	159	1033	2127	19500	ENSG00000142405,ENSG00000196169,ENSG00000114353,ENSG00000132518,ENSG00000204351,ENSG00000197912,ENSG00000161513,ENSG00000107331,ENSG00000205309,ENSG00000005007,ENSG00000124357,ENSG00000142733,ENSG00000137843,ENSG00000013573,ENSG00000065361,ENSG00000186642,ENSG00000108786,ENSG00000034152,ENSG00000111642,ENSG00000155366,ENSG00000149428,ENSG00000179335,ENSG00000004478,ENSG00000141551,ENSG00000185236…
GO:1901265	nucleoside phosphate binding	molecular_function	3.1264e-06	0.0018965	159	1033	2128	19500	ENSG00000205309,ENSG00000107331,ENSG00000005007,ENSG00000142733,ENSG00000124357,ENSG00000137843,ENSG00000204351,ENSG00000114353,ENSG00000196169,ENSG00000132518,ENSG00000142405,ENSG00000161513,ENSG00000197912,ENSG00000155366,ENSG00000111642,ENSG00000141551,ENSG00000004478,ENSG00000149428,ENSG00000179335,ENSG00000065361,ENSG00000013573,ENSG00000034152,ENSG00000108786,ENSG00000186642,ENSG00000196642…
GO:0033043	regulation of organelle organization	biological_process	3.4361e-06	0.0019912	100	1033	1200	19500	ENSG00000160803,ENSG00000163945,ENSG00000148824,ENSG00000141522,ENSG00000175866,ENSG00000124688,ENSG00000174775,ENSG00000103148,ENSG00000133138,ENSG00000099849,ENSG00000158321,ENSG00000071127,ENSG00000082898,ENSG00000154473,ENSG00000132881,ENSG00000110931,ENSG00000167770,ENSG00000137497,ENSG00000015285,ENSG00000011422,ENSG00000182768,ENSG00000215021,ENSG00000070770,ENSG00000196924,ENSG00000184381…
GO:0071840	cellular component organization or biogenesis	biological_process	3.4702e-06	0.0019912	409	1033	6460	19500	ENSG00000072163,ENSG00000197879,ENSG00000139832,ENSG00000141098,ENSG00000052841,ENSG00000136279,ENSG00000173715,ENSG00000135124,ENSG00000042753,ENSG00000172482,ENSG00000229117,ENSG00000132952,ENSG00000169727,ENSG00000101294,ENSG00000187446,ENSG00000142945,ENSG00000182134,ENSG00000167797,ENSG00000163520,ENSG00000164050,ENSG00000165816,ENSG00000130305,ENSG00000181218,ENSG00000166900,ENSG00000187778…
GO:0006915	apoptotic process	biological_process	3.5812e-06	0.0020008	146	1033	1923	19500	ENSG00000101109,ENSG00000071054,ENSG00000141522,ENSG00000166925,ENSG00000099849,ENSG00000167815,ENSG00000127948,ENSG00000174775,ENSG00000160570,ENSG00000160211,ENSG00000141968,ENSG00000096384,ENSG00000148737,ENSG00000213619,ENSG00000159445,ENSG00000140961,ENSG00000104814,ENSG00000185825,ENSG00000071205,ENSG00000113742,ENSG00000167895,ENSG00000078369,ENSG00000179526,ENSG00000135916,ENSG00000070770…
GO:0044710	single-organism metabolic process	biological_process	4.4231e-06	0.0024079	358	1033	5557	19500	ENSG00000180549,ENSG00000071051,ENSG00000006695,ENSG00000177169,ENSG00000004455,ENSG00000032742,ENSG00000160691,ENSG00000100151,ENSG00000175854,ENSG00000165782,ENSG00000149639,ENSG00000175287,ENSG00000166278,ENSG00000139547,ENSG00000137309,ENSG00000141837,ENSG00000173327,ENSG00000126267,ENSG00000110200,ENSG00000127415,ENSG00000114738,ENSG00000164535,ENSG00000132329,ENSG00000171130,ENSG00000011451…
GO:0050839	cell adhesion molecule binding	molecular_function	4.6889e-06	0.0024887	49	1033	470	19500	ENSG00000005844,ENSG00000125449,ENSG00000168003,ENSG00000127527,ENSG00000148341,ENSG00000113758,ENSG00000108622,ENSG00000096384,ENSG00000136732,ENSG00000142186,ENSG00000167110,ENSG00000100139,ENSG00000011009,ENSG00000143375,ENSG00000168488,ENSG00000108518,ENSG00000214063,ENSG00000105767,ENSG00000175866,ENSG00000185236,ENSG00000162236,ENSG00000149925,ENSG00000085733,ENSG00000184640,ENSG00000172534…
GO:0046907	intracellular transport	biological_process	5.5961e-06	0.0028683	147	1033	1953	19500	ENSG00000170315,ENSG00000015285,ENSG00000154118,ENSG00000197912,ENSG00000102898,ENSG00000205323,ENSG00000085872,ENSG00000215021,ENSG00000005007,ENSG00000072310,ENSG00000107331,ENSG00000105647,ENSG00000186642,ENSG00000130204,ENSG00000100321,ENSG00000163930,ENSG00000173933,ENSG00000090581,ENSG00000141551,ENSG00000136717,ENSG00000149428,ENSG00000107862,ENSG00000181830,ENSG00000185236,ENSG00000160014…
GO:0042981	regulation of apoptotic process	biological_process	5.8414e-06	0.0028683	120	1033	1526	19500	ENSG00000141968,ENSG00000096384,ENSG00000084207,ENSG00000159202,ENSG00000148737,ENSG00000213619,ENSG00000140961,ENSG00000162298,ENSG00000068001,ENSG00000172232,ENSG00000158796,ENSG00000185825,ENSG00000071205,ENSG00000104814,ENSG00000198914,ENSG00000113742,ENSG00000167895,ENSG00000101109,ENSG00000163154,ENSG00000275700,ENSG00000157514,ENSG00000071054,ENSG00000141522,ENSG00000167815,ENSG00000166925…
GO:0030163	protein catabolic process	biological_process	5.884e-06	0.0028683	79	1033	899	19500	ENSG00000125447,ENSG00000171100,ENSG00000166851,ENSG00000101266,ENSG00000137275,ENSG00000127452,ENSG00000274897,ENSG00000158062,ENSG00000183655,ENSG00000135108,ENSG00000110200,ENSG00000102805,ENSG00000173039,ENSG00000161203,ENSG00000064601,ENSG00000089053,ENSG00000162236,ENSG00000141480,ENSG00000167977,ENSG00000110801,ENSG00000092871,ENSG00000185453,ENSG00000182670,ENSG00000011009,ENSG00000213923…
GO:0032553	ribonucleotide binding	molecular_function	6.0357e-06	0.0028683	143	1033	1891	19500	ENSG00000067596,ENSG00000149091,ENSG00000160404,ENSG00000112655,ENSG00000004455,ENSG00000177169,ENSG00000133216,ENSG00000213923,ENSG00000130717,ENSG00000079974,ENSG00000157349,ENSG00000172939,ENSG00000101266,ENSG00000137275,ENSG00000173327,ENSG00000173540,ENSG00000185324,ENSG00000114738,ENSG00000138031,ENSG00000102882,ENSG00000117266,ENSG00000073331,ENSG00000198563,ENSG00000059573,ENSG00000105639…
GO:0006461	protein complex assembly	biological_process	6.2984e-06	0.0028683	119	1033	1511	19500	ENSG00000179057,ENSG00000166851,ENSG00000170906,ENSG00000137275,ENSG00000102901,ENSG00000132780,ENSG00000129465,ENSG00000136802,ENSG00000167646,ENSG00000087088,ENSG00000088325,ENSG00000160404,ENSG00000113648,ENSG00000131504,ENSG00000130175,ENSG00000188277,ENSG00000174886,ENSG00000174871,ENSG00000162236,ENSG00000177169,ENSG00000006695,ENSG00000085733,ENSG00000071051,ENSG00000165699,ENSG00000107745…
GO:0070271	protein complex biogenesis	biological_process	6.2984e-06	0.0028683	119	1033	1511	19500	ENSG00000042753,ENSG00000185627,ENSG00000135124,ENSG00000136279,ENSG00000052841,ENSG00000197879,ENSG00000163382,ENSG00000149798,ENSG00000211445,ENSG00000124713,ENSG00000068903,ENSG00000184640,ENSG00000072506,ENSG00000042493,ENSG00000011451,ENSG00000167965,ENSG00000187446,ENSG00000203814,ENSG00000067225,ENSG00000101294,ENSG00000087586,ENSG00000120899,ENSG00000102879,ENSG00000165816,ENSG00000087274…
GO:0044464	cell part	cellular_component	6.3496e-06	0.0028683	934	1033	16790	19500	ENSG00000149260,ENSG00000123064,ENSG00000108474,ENSG00000102805,ENSG00000179921,ENSG00000099331,ENSG00000135299,ENSG00000069998,ENSG00000213654,ENSG00000165282,ENSG00000099290,ENSG00000269713,ENSG00000274897,ENSG00000129757,ENSG00000127452,ENSG00000103269,ENSG00000088881,ENSG00000173826,ENSG00000011009,ENSG00000080603,ENSG00000047056,ENSG00000141480,ENSG00000167461,ENSG00000136143,ENSG00000107077…
GO:0097190	apoptotic signaling pathway	biological_process	6.7485e-06	0.002952	58	1033	600	19500	ENSG00000105327,ENSG00000186827,ENSG00000158941,ENSG00000090339,ENSG00000131871,ENSG00000011422,ENSG00000178719,ENSG00000135916,ENSG00000170315,ENSG00000184381,ENSG00000143546,ENSG00000070770,ENSG00000114353,ENSG00000197043,ENSG00000149428,ENSG00000170633,ENSG00000048028,ENSG00000108953,ENSG00000140464,ENSG00000130427,ENSG00000171552,ENSG00000091732,ENSG00000163349,ENSG00000133317,ENSG00000125826…
GO:0043168	anion binding	molecular_function	6.813e-06	0.002952	193	1033	2715	19500	ENSG00000099331,ENSG00000169718,ENSG00000123064,ENSG00000129465,ENSG00000077463,ENSG00000142186,ENSG00000166851,ENSG00000171100,ENSG00000258947,ENSG00000108518,ENSG00000136143,ENSG00000167461,ENSG00000114770,ENSG00000076555,ENSG00000080603,ENSG00000149927,ENSG00000059758,ENSG00000108883,ENSG00000185527,ENSG00000100228,ENSG00000110455,ENSG00000088325,ENSG00000170633,ENSG00000156587,ENSG00000123384…
GO:0035639	purine ribonucleoside triphosphate binding	molecular_function	7.6014e-06	0.0031694	139	1033	1835	19500	ENSG00000156587,ENSG00000184640,ENSG00000179583,ENSG00000135124,ENSG00000104343,ENSG00000143621,ENSG00000197879,ENSG00000139832,ENSG00000173020,ENSG00000075413,ENSG00000106992,ENSG00000106608,ENSG00000142945,ENSG00000120899,ENSG00000099331,ENSG00000123064,ENSG00000129465,ENSG00000142186,ENSG00000166851,ENSG00000114770,ENSG00000167461,ENSG00000136143,ENSG00000076555,ENSG00000258947,ENSG00000080603…
GO:0005623	cell	cellular_component	7.6416e-06	0.0031694	935	1033	16821	19500	ENSG00000108639,ENSG00000054356,ENSG00000005007,ENSG00000142733,ENSG00000137843,ENSG00000162576,ENSG00000130414,ENSG00000204227,ENSG00000140553,ENSG00000204264,ENSG00000168612,ENSG00000169692,ENSG00000015285,ENSG00000154118,ENSG00000111361,ENSG00000104852,ENSG00000143595,ENSG00000197912,ENSG00000106682,ENSG00000102034,ENSG00000184381,ENSG00000268350,ENSG00000166963,ENSG00000204435,ENSG00000128283…
GO:0042177	negative regulation of protein catabolic process	biological_process	7.9095e-06	0.0031694	22	1033	145	19500	ENSG00000181790,ENSG00000070770,ENSG00000196924,ENSG00000158941,ENSG00000135506,ENSG00000096384,ENSG00000171100,ENSG00000154473,ENSG00000123159,ENSG00000166851,ENSG00000101266,ENSG00000274897,ENSG00000116670,ENSG00000071539,ENSG00000158796,ENSG00000110200,ENSG00000166963,ENSG00000169242,ENSG00000173039,ENSG00000140464,ENSG00000068903,ENSG00000140564
GO:0023051	regulation of signaling	biological_process	8.022e-06	0.0031694	237	1033	3465	19500	ENSG00000138606,ENSG00000071051,ENSG00000160404,ENSG00000174871,ENSG00000160691,ENSG00000133216,ENSG00000100151,ENSG00000092871,ENSG00000110801,ENSG00000213923,ENSG00000132694,ENSG00000137275,ENSG00000172936,ENSG00000101266,ENSG00000141837,ENSG00000185324,ENSG00000138757,ENSG00000180448,ENSG00000173327,ENSG00000102882,ENSG00000104783,ENSG00000111186,ENSG00000114738,ENSG00000173039,ENSG00000132329…
GO:0016241	regulation of macroautophagy	biological_process	8.0611e-06	0.0031694	24	1033	167	19500	ENSG00000103148,ENSG00000165699,ENSG00000100300,ENSG00000072310,ENSG00000126247,ENSG00000014216,ENSG00000109083,ENSG00000167965,ENSG00000085733,ENSG00000148356,ENSG00000160803,ENSG00000070770,ENSG00000196235,ENSG00000177169,ENSG00000032742,ENSG00000102882,ENSG00000188186,ENSG00000171130,ENSG00000204371,ENSG00000117410,ENSG00000143882,ENSG00000171100,ENSG00000110931,ENSG00000160360
GO:0009966	regulation of signal transduction	biological_process	8.2407e-06	0.0031811	215	1033	3092	19500	ENSG00000127533,ENSG00000135299,ENSG00000099331,ENSG00000053524,ENSG00000129465,ENSG00000178752,ENSG00000171100,ENSG00000197114,ENSG00000129757,ENSG00000187147,ENSG00000106245,ENSG00000068971,ENSG00000141480,ENSG00000165699,ENSG00000164362,ENSG00000185527,ENSG00000136305,ENSG00000014216,ENSG00000109083,ENSG00000085733,ENSG00000088325,ENSG00000160789,ENSG00000170801,ENSG00000149798,ENSG00000169727…
GO:0017076	purine nucleotide binding	molecular_function	9.0005e-06	0.0033859	142	1033	1888	19500	ENSG00000198909,ENSG00000198055,ENSG00000114993,ENSG00000266173,ENSG00000176170,ENSG00000166508,ENSG00000105639,ENSG00000059573,ENSG00000139890,ENSG00000067225,ENSG00000087586,ENSG00000197562,ENSG00000011485,ENSG00000163344,ENSG00000062524,ENSG00000164402,ENSG00000173327,ENSG00000185324,ENSG00000173540,ENSG00000157349,ENSG00000172939,ENSG00000079974,ENSG00000137275,ENSG00000101266,ENSG00000073331…
GO:0016043	cellular component organization	biological_process	9.1115e-06	0.0033859	398	1033	6310	19500	ENSG00000170801,ENSG00000177192,ENSG00000107077,ENSG00000141696,ENSG00000136305,ENSG00000109083,ENSG00000080603,ENSG00000011009,ENSG00000156990,ENSG00000163995,ENSG00000076555,ENSG00000167461,ENSG00000141480,ENSG00000204371,ENSG00000187778,ENSG00000085185,ENSG00000132780,ENSG00000102805,ENSG00000179921,ENSG00000077514,ENSG00000101294,ENSG00000187446,ENSG00000142945,ENSG00000182134,ENSG00000167797…
GO:0005654	nucleoplasm	cellular_component	9.2498e-06	0.0033859	237	1033	3472	19500	ENSG00000122965,ENSG00000182872,ENSG00000165802,ENSG00000077514,ENSG00000204371,ENSG00000132780,ENSG00000187778,ENSG00000085185,ENSG00000102901,ENSG00000077463,ENSG00000159479,ENSG00000166851,ENSG00000063244,ENSG00000142669,ENSG00000106245,ENSG00000110786,ENSG00000140332,ENSG00000164362,ENSG00000080603,ENSG00000108883,ENSG00000088325,ENSG00000113648,ENSG00000107077,ENSG00000160789,ENSG00000089053…
GO:0012501	programmed cell death	biological_process	9.44e-06	0.003397	152	1033	2052	19500	ENSG00000159202,ENSG00000084207,ENSG00000125952,ENSG00000158796,ENSG00000162298,ENSG00000172232,ENSG00000068001,ENSG00000198914,ENSG00000100813,ENSG00000062598,ENSG00000163154,ENSG00000126247,ENSG00000157514,ENSG00000275700,ENSG00000197785,ENSG00000034152,ENSG00000125826,ENSG00000065361,ENSG00000136717,ENSG00000184058,ENSG00000149428,ENSG00000091732,ENSG00000151208,ENSG00000124664,ENSG00000170315…
GO:0032555	purine ribonucleotide binding	molecular_function	1.0066e-05	0.0034708	141	1033	1876	19500	ENSG00000100228,ENSG00000088325,ENSG00000108883,ENSG00000185527,ENSG00000080603,ENSG00000059758,ENSG00000258947,ENSG00000136143,ENSG00000167461,ENSG00000114770,ENSG00000076555,ENSG00000142186,ENSG00000166851,ENSG00000123064,ENSG00000129465,ENSG00000099331,ENSG00000120899,ENSG00000142945,ENSG00000106608,ENSG00000075413,ENSG00000106992,ENSG00000197879,ENSG00000139832,ENSG00000173020,ENSG00000135124…
GO:0043067	regulation of programmed cell death	biological_process	1.0124e-05	0.0034708	120	1033	1541	19500	ENSG00000122641,ENSG00000079805,ENSG00000065361,ENSG00000142330,ENSG00000109854,ENSG00000034152,ENSG00000125826,ENSG00000171552,ENSG00000124664,ENSG00000140464,ENSG00000130725,ENSG00000091732,ENSG00000151208,ENSG00000204673,ENSG00000184058,ENSG00000149428,ENSG00000136717,ENSG00000108953,ENSG00000196924,ENSG00000215021,ENSG00000070770,ENSG00000184381,ENSG00000142405,ENSG00000114353,ENSG00000168918…
GO:0032550	purine ribonucleoside binding	molecular_function	1.0136e-05	0.0034708	139	1033	1844	19500	ENSG00000142945,ENSG00000120899,ENSG00000106992,ENSG00000075413,ENSG00000106608,ENSG00000135124,ENSG00000104343,ENSG00000143621,ENSG00000197879,ENSG00000139832,ENSG00000173020,ENSG00000156587,ENSG00000179583,ENSG00000184640,ENSG00000108883,ENSG00000100228,ENSG00000088325,ENSG00000258947,ENSG00000167461,ENSG00000136143,ENSG00000076555,ENSG00000114770,ENSG00000059758,ENSG00000080603,ENSG00000142186…
GO:0065003	macromolecular complex assembly	biological_process	1.0449e-05	0.0035212	142	1033	1894	19500	ENSG00000120903,ENSG00000169371,ENSG00000114745,ENSG00000167110,ENSG00000037042,ENSG00000054116,ENSG00000125952,ENSG00000204220,ENSG00000105341,ENSG00000185130,ENSG00000169689,ENSG00000143740,ENSG00000149925,ENSG00000064313,ENSG00000144028,ENSG00000160741,ENSG00000140990,ENSG00000155366,ENSG00000151208,ENSG00000004478,ENSG00000141551,ENSG00000136717,ENSG00000204435,ENSG00000188486,ENSG00000128283…
GO:0012505	endomembrane system	cellular_component	1.083e-05	0.0035375	285	1033	4309	19500	ENSG00000165782,ENSG00000100151,ENSG00000100721,ENSG00000174871,ENSG00000177169,ENSG00000131504,ENSG00000160404,ENSG00000071051,ENSG00000184014,ENSG00000180549,ENSG00000171130,ENSG00000111186,ENSG00000068400,ENSG00000180448,ENSG00000157349,ENSG00000139547,ENSG00000125447,ENSG00000026751,ENSG00000039523,ENSG00000165915,ENSG00000197562,ENSG00000102879,ENSG00000129219,ENSG00000141252,ENSG00000143546…
GO:0001883	purine nucleoside binding	molecular_function	1.0997e-05	0.0035375	139	1033	1847	19500	ENSG00000013573,ENSG00000065361,ENSG00000034152,ENSG00000111642,ENSG00000155366,ENSG00000149428,ENSG00000179335,ENSG00000004478,ENSG00000141551,ENSG00000142405,ENSG00000204351,ENSG00000132518,ENSG00000196169,ENSG00000114353,ENSG00000197912,ENSG00000107331,ENSG00000142733,ENSG00000005007,ENSG00000124357,ENSG00000137843,ENSG00000132881,ENSG00000159202,ENSG00000037042,ENSG00000166548,ENSG00000140474…
GO:0032549	ribonucleoside binding	molecular_function	1.0997e-05	0.0035375	139	1033	1847	19500	ENSG00000185236,ENSG00000049541,ENSG00000148824,ENSG00000172432,ENSG00000196642,ENSG00000144028,ENSG00000143393,ENSG00000197785,ENSG00000132881,ENSG00000037042,ENSG00000159202,ENSG00000166548,ENSG00000214021,ENSG00000140474,ENSG00000114353,ENSG00000132518,ENSG00000196169,ENSG00000204351,ENSG00000142405,ENSG00000197912,ENSG00000107331,ENSG00000142733,ENSG00000005007,ENSG00000137843,ENSG00000124357…
GO:0044248	cellular catabolic process	biological_process	1.2233e-05	0.0038764	151	1033	2046	19500	ENSG00000179526,ENSG00000129071,ENSG00000110651,ENSG00000070770,ENSG00000133612,ENSG00000179364,ENSG00000103056,ENSG00000196998,ENSG00000100300,ENSG00000168397,ENSG00000071539,ENSG00000048028,ENSG00000173821,ENSG00000140464,ENSG00000166938,ENSG00000135924,ENSG00000140564,ENSG00000103066,ENSG00000160803,ENSG00000198825,ENSG00000167815,ENSG00000179134,ENSG00000100298,ENSG00000160570,ENSG00000006007…
GO:0008152	metabolic process	biological_process	1.325e-05	0.0041368	703	1033	12075	19500	ENSG00000135899,ENSG00000168487,ENSG00000143382,ENSG00000100207,ENSG00000043143,ENSG00000176261,ENSG00000123159,ENSG00000171298,ENSG00000114993,ENSG00000068903,ENSG00000100258,ENSG00000188186,ENSG00000006194,ENSG00000178498,ENSG00000157227,ENSG00000131871,ENSG00000117385,ENSG00000167548,ENSG00000011485,ENSG00000165861,ENSG00000146674,ENSG00000184470,ENSG00000185324,ENSG00000172939,ENSG00000172936…
GO:0001882	nucleoside binding	molecular_function	1.3625e-05	0.0041925	139	1033	1854	19500	ENSG00000005007,ENSG00000124357,ENSG00000137843,ENSG00000142733,ENSG00000107331,ENSG00000197912,ENSG00000142405,ENSG00000204351,ENSG00000114353,ENSG00000132518,ENSG00000196169,ENSG00000179335,ENSG00000149428,ENSG00000004478,ENSG00000141551,ENSG00000111642,ENSG00000155366,ENSG00000034152,ENSG00000013573,ENSG00000065361,ENSG00000197785,ENSG00000143393,ENSG00000144028,ENSG00000196642,ENSG00000172432…
GO:0033554	cellular response to stress	biological_process	1.5769e-05	0.0047744	151	1033	2054	19500	ENSG00000090238,ENSG00000048028,ENSG00000108953,ENSG00000166986,ENSG00000140464,ENSG00000171552,ENSG00000204673,ENSG00000163349,ENSG00000168397,ENSG00000106462,ENSG00000051523,ENSG00000071539,ENSG00000079805,ENSG00000179364,ENSG00000105327,ENSG00000197299,ENSG00000100142,ENSG00000100300,ENSG00000090339,ENSG00000129071,ENSG00000143578,ENSG00000170345,ENSG00000152457,ENSG00000149923,ENSG00000133612…
GO:0044454	nuclear chromosome part	cellular_component	1.5966e-05	0.0047744	51	1033	519	19500	ENSG00000185499,ENSG00000139613,ENSG00000013573,ENSG00000106462,ENSG00000140464,ENSG00000068903,ENSG00000111642,ENSG00000105011,ENSG00000166508,ENSG00000071564,ENSG00000188486,ENSG00000087586,ENSG00000152457,ENSG00000204227,ENSG00000197299,ENSG00000158941,ENSG00000125347,ENSG00000109118,ENSG00000257949,ENSG00000005007,ENSG00000181218,ENSG00000106245,ENSG00000175482,ENSG00000148737,ENSG00000101266…
GO:1902589	single-organism organelle organization	biological_process	1.8234e-05	0.0053767	190	1033	2706	19500	ENSG00000152457,ENSG00000122390,ENSG00000196924,ENSG00000183617,ENSG00000070770,ENSG00000011243,ENSG00000105327,ENSG00000196998,ENSG00000197299,ENSG00000090339,ENSG00000054654,ENSG00000100300,ENSG00000156931,ENSG00000106462,ENSG00000142330,ENSG00000168397,ENSG00000102125,ENSG00000162517,ENSG00000141933,ENSG00000139613,ENSG00000071539,ENSG00000187535,ENSG00000079805,ENSG00000144488,ENSG00000108953…
GO:0000790	nuclear chromatin	cellular_component	1.9645e-05	0.0057134	36	1033	322	19500	ENSG00000196498,ENSG00000189060,ENSG00000125817,ENSG00000175854,ENSG00000131196,ENSG00000113648,ENSG00000107077,ENSG00000127511,ENSG00000165802,ENSG00000130522,ENSG00000173039,ENSG00000077463,ENSG00000204371,ENSG00000187778,ENSG00000132780,ENSG00000102901,ENSG00000158773,ENSG00000125952,ENSG00000148737,ENSG00000101266,ENSG00000127528,ENSG00000106245,ENSG00000181218,ENSG00000109118,ENSG00000158941…
GO:1902582	single-organism intracellular transport	biological_process	2.1167e-05	0.0059974	130	1033	1725	19500	ENSG00000100300,ENSG00000054654,ENSG00000083454,ENSG00000105327,ENSG00000011243,ENSG00000146232,ENSG00000133612,ENSG00000070770,ENSG00000116350,ENSG00000140464,ENSG00000171552,ENSG00000196230,ENSG00000108953,ENSG00000051523,ENSG00000163812,ENSG00000079805,ENSG00000187535,ENSG00000168397,ENSG00000162517,ENSG00000147533,ENSG00000174775,ENSG00000017260,ENSG00000198825,ENSG00000167851,ENSG00000242247…
GO:0051128	regulation of cellular component organization	biological_process	2.1186e-05	0.0059974	175	1033	2462	19500	ENSG00000132694,ENSG00000213923,ENSG00000116786,ENSG00000168488,ENSG00000133216,ENSG00000100721,ENSG00000196405,ENSG00000100151,ENSG00000131504,ENSG00000188277,ENSG00000032742,ENSG00000112655,ENSG00000177169,ENSG00000184014,ENSG00000110324,ENSG00000071051,ENSG00000089820,ENSG00000073060,ENSG00000161203,ENSG00000198563,ENSG00000087088,ENSG00000110200,ENSG00000172757,ENSG00000102882,ENSG00000185324…
GO:0072511	divalent inorganic cation transport	biological_process	2.2847e-05	0.0063824	46	1033	457	19500	ENSG00000183172,ENSG00000102879,ENSG00000105327,ENSG00000090339,ENSG00000083454,ENSG00000165915,ENSG00000100300,ENSG00000165125,ENSG00000154118,ENSG00000100991,ENSG00000197912,ENSG00000160991,ENSG00000120899,ENSG00000197043,ENSG00000085872,ENSG00000114353,ENSG00000215021,ENSG00000139890,ENSG00000074370,ENSG00000184381,ENSG00000108953,ENSG00000130427,ENSG00000140464,ENSG00000135124,ENSG00000186642…
GO:0030838	positive regulation of actin filament polymerization	biological_process	2.4055e-05	0.0066325	16	1033	92	19500	ENSG00000197879,ENSG00000128283,ENSG00000149798,ENSG00000136717,ENSG00000167965,ENSG00000015285,ENSG00000085733,ENSG00000071051,ENSG00000188277,ENSG00000175866,ENSG00000120899,ENSG00000108518,ENSG00000196405,ENSG00000102879,ENSG00000100151,ENSG00000090339
GO:1901575	organic substance catabolic process	biological_process	2.7035e-05	0.0073588	145	1033	1977	19500	ENSG00000100439,ENSG00000181790,ENSG00000149925,ENSG00000128309,ENSG00000088038,ENSG00000108515,ENSG00000068001,ENSG00000162298,ENSG00000158796,ENSG00000154473,ENSG00000159202,ENSG00000111669,ENSG00000196743,ENSG00000168159,ENSG00000142327,ENSG00000184381,ENSG00000204351,ENSG00000136699,ENSG00000170315,ENSG00000204264,ENSG00000205309,ENSG00000117448,ENSG00000005007,ENSG00000124357,ENSG00000163930…
GO:0008219	cell death	biological_process	2.8943e-05	0.0076812	158	1033	2193	19500	ENSG00000197785,ENSG00000157514,ENSG00000275700,ENSG00000126247,ENSG00000163154,ENSG00000062598,ENSG00000100813,ENSG00000198914,ENSG00000068001,ENSG00000172232,ENSG00000162298,ENSG00000158796,ENSG00000125952,ENSG00000084207,ENSG00000159202,ENSG00000137843,ENSG00000184381,ENSG00000142405,ENSG00000215021,ENSG00000114353,ENSG00000011422,ENSG00000197912,ENSG00000170315,ENSG00000124664,ENSG00000151208…
GO:0016265	death	biological_process	2.8943e-05	0.0076812	158	1033	2193	19500	ENSG00000065361,ENSG00000125826,ENSG00000034152,ENSG00000151208,ENSG00000091732,ENSG00000124664,ENSG00000136717,ENSG00000149428,ENSG00000184058,ENSG00000114353,ENSG00000184381,ENSG00000142405,ENSG00000215021,ENSG00000170315,ENSG00000011422,ENSG00000197912,ENSG00000137843,ENSG00000158796,ENSG00000172232,ENSG00000068001,ENSG00000162298,ENSG00000159202,ENSG00000125952,ENSG00000084207,ENSG00000062598…
GO:0010941	regulation of cell death	biological_process	2.9591e-05	0.0077562	126	1033	1673	19500	ENSG00000105701,ENSG00000185499,ENSG00000198909,ENSG00000120949,ENSG00000172667,ENSG00000143382,ENSG00000072163,ENSG00000122679,ENSG00000175505,ENSG00000068903,ENSG00000130427,ENSG00000176170,ENSG00000266173,ENSG00000114993,ENSG00000123384,ENSG00000170633,ENSG00000118960,ENSG00000169242,ENSG00000143546,ENSG00000105639,ENSG00000197283,ENSG00000087586,ENSG00000120899,ENSG00000178719,ENSG00000187446…
GO:0071822	protein complex subunit organization	biological_process	3.0666e-05	0.0079399	143	1033	1950	19500	ENSG00000126216,ENSG00000130414,ENSG00000005007,ENSG00000196169,ENSG00000167460,ENSG00000106682,ENSG00000015285,ENSG00000155366,ENSG00000149792,ENSG00000188486,ENSG00000128283,ENSG00000166780,ENSG00000172534,ENSG00000004478,ENSG00000141551,ENSG00000136717,ENSG00000160741,ENSG00000140990,ENSG00000134013,ENSG00000143740,ENSG00000149925,ENSG00000105341,ENSG00000204220,ENSG00000169689,ENSG00000185130…
GO:0043167	ion binding	molecular_function	3.2015e-05	0.0081892	385	1033	6149	19500	ENSG00000163349,ENSG00000162517,ENSG00000181722,ENSG00000079805,ENSG00000161217,ENSG00000090238,ENSG00000173821,ENSG00000166986,ENSG00000163703,ENSG00000149923,ENSG00000135916,ENSG00000011243,ENSG00000047230,ENSG00000074370,ENSG00000070770,ENSG00000120049,ENSG00000167395,ENSG00000197043,ENSG00000196998,ENSG00000197299,ENSG00000233198,ENSG00000126458,ENSG00000120913,ENSG00000100139,ENSG00000137880…
GO:0006816	calcium ion transport	biological_process	3.4214e-05	0.0086476	42	1033	410	19500	ENSG00000131504,ENSG00000160014,ENSG00000017260,ENSG00000184014,ENSG00000156026,ENSG00000107745,ENSG00000166592,ENSG00000141480,ENSG00000168003,ENSG00000125648,ENSG00000185482,ENSG00000141837,ENSG00000132329,ENSG00000087088,ENSG00000127533,ENSG00000104783,ENSG00000215021,ENSG00000139890,ENSG00000074370,ENSG00000184381,ENSG00000120899,ENSG00000197043,ENSG00000085872,ENSG00000114353,ENSG00000160991…
GO:0044877	macromolecular complex binding	molecular_function	3.7536e-05	0.0093757	122	1033	1617	19500	ENSG00000123384,ENSG00000179583,ENSG00000122359,ENSG00000068903,ENSG00000141506,ENSG00000084764,ENSG00000132507,ENSG00000077312,ENSG00000197879,ENSG00000136279,ENSG00000130165,ENSG00000102879,ENSG00000117385,ENSG00000011485,ENSG00000130475,ENSG00000182199,ENSG00000087274,ENSG00000158941,ENSG00000187446,ENSG00000142945,ENSG00000042493,ENSG00000168522,ENSG00000120899,ENSG00000176438,ENSG00000143546…
GO:0070838	divalent metal ion transport	biological_process	3.8702e-05	0.0095543	45	1033	453	19500	ENSG00000154118,ENSG00000165125,ENSG00000100991,ENSG00000197912,ENSG00000160991,ENSG00000120899,ENSG00000197043,ENSG00000085872,ENSG00000114353,ENSG00000139890,ENSG00000215021,ENSG00000074370,ENSG00000184381,ENSG00000183172,ENSG00000102879,ENSG00000105327,ENSG00000090339,ENSG00000083454,ENSG00000100300,ENSG00000165915,ENSG00000135124,ENSG00000186642,ENSG00000122679,ENSG00000051523,ENSG00000108953…
GO:0044085	cellular component biogenesis	biological_process	4.2283e-05	0.010318	198	1033	2879	19500	ENSG00000170906,ENSG00000171100,ENSG00000166851,ENSG00000167646,ENSG00000285130,ENSG00000204371,ENSG00000132780,ENSG00000102901,ENSG00000129465,ENSG00000179921,ENSG00000162236,ENSG00000088325,ENSG00000113648,ENSG00000174886,ENSG00000130175,ENSG00000141696,ENSG00000085733,ENSG00000109083,ENSG00000165699,ENSG00000125445,ENSG00000156026,ENSG00000047056,ENSG00000076555,ENSG00000068971,ENSG00000108518…
GO:0031967	organelle envelope	cellular_component	4.5754e-05	0.010915	93	1033	1166	19500	ENSG00000196230,ENSG00000091732,ENSG00000135924,ENSG00000171552,ENSG00000139190,ENSG00000136717,ENSG00000149792,ENSG00000050426,ENSG00000130204,ENSG00000079805,ENSG00000161217,ENSG00000140990,ENSG00000102125,ENSG00000106976,ENSG00000109854,ENSG00000186642,ENSG00000100300,ENSG00000130414,ENSG00000083454,ENSG00000054654,ENSG00000072310,ENSG00000105327,ENSG00000132518,ENSG00000182768,ENSG00000268350…
GO:0031975	envelope	cellular_component	4.5754e-05	0.010915	93	1033	1166	19500	ENSG00000215021,ENSG00000268350,ENSG00000074370,ENSG00000183617,ENSG00000182768,ENSG00000132518,ENSG00000161513,ENSG00000102898,ENSG00000143578,ENSG00000197912,ENSG00000170315,ENSG00000130414,ENSG00000072310,ENSG00000054654,ENSG00000083454,ENSG00000100300,ENSG00000105327,ENSG00000161217,ENSG00000130204,ENSG00000079805,ENSG00000186642,ENSG00000109854,ENSG00000106976,ENSG00000102125,ENSG00000140990…
GO:0000228	nuclear chromosome	cellular_component	4.8367e-05	0.011304	52	1033	555	19500	ENSG00000185499,ENSG00000139613,ENSG00000013573,ENSG00000106462,ENSG00000068903,ENSG00000140464,ENSG00000105011,ENSG00000111642,ENSG00000166508,ENSG00000071564,ENSG00000188486,ENSG00000087586,ENSG00000152457,ENSG00000204227,ENSG00000158941,ENSG00000197299,ENSG00000125347,ENSG00000109118,ENSG00000257949,ENSG00000005007,ENSG00000181218,ENSG00000106245,ENSG00000175482,ENSG00000148737,ENSG00000101266…
GO:0043228	non-membrane-bounded organelle	cellular_component	4.8985e-05	0.011304	269	1033	4110	19500	ENSG00000124787,ENSG00000163945,ENSG00000149925,ENSG00000160014,ENSG00000049541,ENSG00000196498,ENSG00000125817,ENSG00000196642,ENSG00000125952,ENSG00000154473,ENSG00000167110,ENSG00000037042,ENSG00000132881,ENSG00000056586,ENSG00000100813,ENSG00000214021,ENSG00000169689,ENSG00000015285,ENSG00000184381,ENSG00000177106,ENSG00000109118,ENSG00000108639,ENSG00000137843,ENSG00000257949,ENSG00000005007…
GO:0043232	intracellular non-membrane-bounded organelle	cellular_component	4.8985e-05	0.011304	269	1033	4110	19500	ENSG00000168488,ENSG00000189060,ENSG00000196405,ENSG00000176058,ENSG00000099814,ENSG00000173039,ENSG00000089820,ENSG00000102882,ENSG00000172757,ENSG00000185324,ENSG00000079974,ENSG00000113108,ENSG00000177731,ENSG00000141644,ENSG00000131871,ENSG00000157227,ENSG00000105639,ENSG00000042493,ENSG00000068903,ENSG00000167671,ENSG00000141506,ENSG00000196642,ENSG00000125817,ENSG00000196498,ENSG00000049541…
GO:0043933	macromolecular complex subunit organization	biological_process	4.9624e-05	0.011329	194	1033	2819	19500	ENSG00000100092,ENSG00000132507,ENSG00000168883,ENSG00000185499,ENSG00000043143,ENSG00000126214,ENSG00000168487,ENSG00000124713,ENSG00000068903,ENSG00000072506,ENSG00000042493,ENSG00000011451,ENSG00000203814,ENSG00000067225,ENSG00000087586,ENSG00000130165,ENSG00000102879,ENSG00000182199,ENSG00000087274,ENSG00000167548,ENSG00000011485,ENSG00000160685,ENSG00000179057,ENSG00000137275,ENSG00000137309…
GO:0000785	chromatin	cellular_component	5.136e-05	0.011567	48	1033	500	19500	ENSG00000109118,ENSG00000005007,ENSG00000181218,ENSG00000204227,ENSG00000158941,ENSG00000125347,ENSG00000203814,ENSG00000129071,ENSG00000011243,ENSG00000070770,ENSG00000166508,ENSG00000071564,ENSG00000204435,ENSG00000188486,ENSG00000068903,ENSG00000140464,ENSG00000111642,ENSG00000105011,ENSG00000134013,ENSG00000106462,ENSG00000185499,ENSG00000139613,ENSG00000013573,ENSG00000125817,ENSG00000196498…
GO:0031329	regulation of cellular catabolic process	biological_process	5.1757e-05	0.011567	59	1033	657	19500	ENSG00000103148,ENSG00000167461,ENSG00000076555,ENSG00000149639,ENSG00000213923,ENSG00000165699,ENSG00000085733,ENSG00000160803,ENSG00000126247,ENSG00000014216,ENSG00000109083,ENSG00000177169,ENSG00000196235,ENSG00000032742,ENSG00000102882,ENSG00000110200,ENSG00000087088,ENSG00000117410,ENSG00000077463,ENSG00000171130,ENSG00000073060,ENSG00000204371,ENSG00000101266,ENSG00000167110,ENSG00000143882…
GO:0051258	protein polymerization	biological_process	5.2569e-05	0.011626	30	1033	260	19500	ENSG00000102879,ENSG00000196405,ENSG00000108518,ENSG00000100151,ENSG00000167468,ENSG00000129680,ENSG00000126216,ENSG00000087274,ENSG00000090339,ENSG00000167965,ENSG00000042493,ENSG00000085733,ENSG00000071051,ENSG00000015285,ENSG00000131504,ENSG00000188277,ENSG00000175866,ENSG00000120899,ENSG00000149798,ENSG00000128283,ENSG00000136717,ENSG00000004478,ENSG00000141551,ENSG00000137497,ENSG00000037042…
GO:2001234	negative regulation of apoptotic signaling pathway	biological_process	5.3422e-05	0.011648	27	1033	223	19500	ENSG00000185499,ENSG00000162298,ENSG00000084207,ENSG00000137275,ENSG00000213619,ENSG00000101266,ENSG00000148737,ENSG00000130427,ENSG00000171552,ENSG00000173039,ENSG00000196588,ENSG00000091732,ENSG00000087088,ENSG00000170633,ENSG00000149428,ENSG00000070770,ENSG00000160789,ENSG00000114353,ENSG00000011422,ENSG00000178719,ENSG00000085733,ENSG00000158941,ENSG00000090339,ENSG00000131871,ENSG00000164362…
GO:1903363	negative regulation of cellular protein catabolic process	biological_process	5.3766e-05	0.011648	16	1033	98	19500	ENSG00000070770,ENSG00000158941,ENSG00000101266,ENSG00000154473,ENSG00000096384,ENSG00000171100,ENSG00000123159,ENSG00000166851,ENSG00000274897,ENSG00000116670,ENSG00000071539,ENSG00000166963,ENSG00000169242,ENSG00000110200,ENSG00000140564,ENSG00000140464
GO:0042176	regulation of protein catabolic process	biological_process	6.0615e-05	0.012999	40	1033	393	19500	ENSG00000213923,ENSG00000135506,ENSG00000100083,ENSG00000181790,ENSG00000160803,ENSG00000162236,ENSG00000110200,ENSG00000173039,ENSG00000166851,ENSG00000154473,ENSG00000171100,ENSG00000125447,ENSG00000096384,ENSG00000101266,ENSG00000082898,ENSG00000274897,ENSG00000158796,ENSG00000185825,ENSG00000158941,ENSG00000170315,ENSG00000110651,ENSG00000070770,ENSG00000196924,ENSG00000120899,ENSG00000087586…
GO:1903051	negative regulation of proteolysis involved in cellular protein catabolic process	biological_process	6.2574e-05	0.013285	15	1033	89	19500	ENSG00000070770,ENSG00000274897,ENSG00000116670,ENSG00000071539,ENSG00000171100,ENSG00000096384,ENSG00000154473,ENSG00000123159,ENSG00000166851,ENSG00000101266,ENSG00000140464,ENSG00000158941,ENSG00000110200,ENSG00000166963,ENSG00000169242
GO:0071417	cellular response to organonitrogen compound	biological_process	6.846e-05	0.014325	50	1033	534	19500	ENSG00000160685,ENSG00000072310,ENSG00000131871,ENSG00000090339,ENSG00000197299,ENSG00000105647,ENSG00000165816,ENSG00000114353,ENSG00000067225,ENSG00000105639,ENSG00000123384,ENSG00000068903,ENSG00000163884,ENSG00000171552,ENSG00000188186,ENSG00000166986,ENSG00000197879,ENSG00000079805,ENSG00000051523,ENSG00000100401,ENSG00000239282,ENSG00000135124,ENSG00000142330,ENSG00000186642,ENSG00000106462…
GO:0032104	regulation of response to extracellular stimulus	biological_process	6.9719e-05	0.014325	24	1033	190	19500	ENSG00000160803,ENSG00000148356,ENSG00000085733,ENSG00000167965,ENSG00000126247,ENSG00000109083,ENSG00000014216,ENSG00000032742,ENSG00000177169,ENSG00000196235,ENSG00000070770,ENSG00000103148,ENSG00000072310,ENSG00000100300,ENSG00000165699,ENSG00000171100,ENSG00000143882,ENSG00000160360,ENSG00000110931,ENSG00000188186,ENSG00000102882,ENSG00000117410,ENSG00000204371,ENSG00000171130
GO:0032107	regulation of response to nutrient levels	biological_process	6.9719e-05	0.014325	24	1033	190	19500	ENSG00000103148,ENSG00000165699,ENSG00000100300,ENSG00000072310,ENSG00000109083,ENSG00000126247,ENSG00000014216,ENSG00000167965,ENSG00000148356,ENSG00000085733,ENSG00000160803,ENSG00000070770,ENSG00000177169,ENSG00000196235,ENSG00000032742,ENSG00000102882,ENSG00000188186,ENSG00000171130,ENSG00000204371,ENSG00000117410,ENSG00000143882,ENSG00000171100,ENSG00000110931,ENSG00000160360
GO:0044237	cellular metabolic process	biological_process	7.0171e-05	0.014325	630	1033	10772	19500	ENSG00000167770,ENSG00000066422,ENSG00000099991,ENSG00000148335,ENSG00000113742,ENSG00000137497,ENSG00000101109,ENSG00000071054,ENSG00000127511,ENSG00000100298,ENSG00000167792,ENSG00000160570,ENSG00000006007,ENSG00000158321,ENSG00000135469,ENSG00000259431,ENSG00000197937,ENSG00000102125,ENSG00000086102,ENSG00000106976,ENSG00000139613,ENSG00000142409,ENSG00000172992,ENSG00000119771,ENSG00000108953…
GO:0044712	single-organism catabolic process	biological_process	7.5091e-05	0.015162	95	1033	1213	19500	ENSG00000140564,ENSG00000168397,ENSG00000186642,ENSG00000149782,ENSG00000071539,ENSG00000117448,ENSG00000179364,ENSG00000124357,ENSG00000196998,ENSG00000103056,ENSG00000205309,ENSG00000100300,ENSG00000072310,ENSG00000129071,ENSG00000136699,ENSG00000184381,ENSG00000187045,ENSG00000070770,ENSG00000196743,ENSG00000111669,ENSG00000164687,ENSG00000143882,ENSG00000154473,ENSG00000068001,ENSG00000162298…
GO:1903649	regulation of cytoplasmic transport	biological_process	7.57e-05	0.015162	35	1033	330	19500	ENSG00000160014,ENSG00000131504,ENSG00000135506,ENSG00000068001,ENSG00000138757,ENSG00000185825,ENSG00000096384,ENSG00000082898,ENSG00000148737,ENSG00000087088,ENSG00000102882,ENSG00000014164,ENSG00000127533,ENSG00000011243,ENSG00000146232,ENSG00000070770,ENSG00000120899,ENSG00000102898,ENSG00000187446,ENSG00000105647,ENSG00000083454,ENSG00000072310,ENSG00000102879,ENSG00000157110,ENSG00000173933…
GO:0007166	cell surface receptor signaling pathway	biological_process	7.6949e-05	0.015268	197	1033	2891	19500	ENSG00000133246,ENSG00000158555,ENSG00000062598,ENSG00000140474,ENSG00000056586,ENSG00000158796,ENSG00000068001,ENSG00000084207,ENSG00000143882,ENSG00000143375,ENSG00000125148,ENSG00000181790,ENSG00000091732,ENSG00000151208,ENSG00000181830,ENSG00000204435,ENSG00000141551,ENSG00000078699,ENSG00000065361,ENSG00000125826,ENSG00000149782,ENSG00000072310,ENSG00000105647,ENSG00000204264,ENSG00000054356…
GO:0022607	cellular component assembly	biological_process	8.1979e-05	0.016116	183	1033	2657	19500	ENSG00000103148,ENSG00000167614,ENSG00000149571,ENSG00000144028,ENSG00000064313,ENSG00000181790,ENSG00000149925,ENSG00000143740,ENSG00000214021,ENSG00000185130,ENSG00000169689,ENSG00000105341,ENSG00000204220,ENSG00000125952,ENSG00000167110,ENSG00000037042,ENSG00000054116,ENSG00000114745,ENSG00000120903,ENSG00000169371,ENSG00000126216,ENSG00000130414,ENSG00000106682,ENSG00000015285,ENSG00000170315…
GO:1901699	cellular response to nitrogen compound	biological_process	8.714e-05	0.016937	55	1033	611	19500	ENSG00000166986,ENSG00000188186,ENSG00000087087,ENSG00000123384,ENSG00000171552,ENSG00000179583,ENSG00000068903,ENSG00000163884,ENSG00000135124,ENSG00000239282,ENSG00000106462,ENSG00000186642,ENSG00000142330,ENSG00000079805,ENSG00000197879,ENSG00000013573,ENSG00000100401,ENSG00000051523,ENSG00000165816,ENSG00000131871,ENSG00000090339,ENSG00000072310,ENSG00000160685,ENSG00000105647,ENSG00000197299…
GO:0010647	positive regulation of cell communication	biological_process	8.7754e-05	0.016937	127	1033	1730	19500	ENSG00000143546,ENSG00000120899,ENSG00000112799,ENSG00000213658,ENSG00000167965,ENSG00000148356,ENSG00000027869,ENSG00000158941,ENSG00000011485,ENSG00000167548,ENSG00000160685,ENSG00000146674,ENSG00000166900,ENSG00000157110,ENSG00000164050,ENSG00000107338,ENSG00000136279,ENSG00000105701,ENSG00000072163,ENSG00000197879,ENSG00000198909,ENSG00000122679,ENSG00000123159,ENSG00000141506,ENSG00000135124…
GO:0051641	cellular localization	biological_process	8.9862e-05	0.017188	241	1033	3656	19500	ENSG00000101425,ENSG00000169180,ENSG00000197119,ENSG00000162383,ENSG00000149925,ENSG00000172432,ENSG00000185236,ENSG00000069424,ENSG00000160014,ENSG00000143740,ENSG00000196743,ENSG00000133246,ENSG00000167110,ENSG00000054116,ENSG00000084207,ENSG00000185482,ENSG00000169371,ENSG00000125648,ENSG00000132881,ENSG00000162298,ENSG00000068001,ENSG00000172232,ENSG00000114745,ENSG00000005007,ENSG00000054356…
GO:0043005	neuron projection	cellular_component	9.6274e-05	0.01825	83	1033	1034	19500	ENSG00000106976,ENSG00000141933,ENSG00000079805,ENSG00000051523,ENSG00000124772,ENSG00000136717,ENSG00000166963,ENSG00000108953,ENSG00000141551,ENSG00000004478,ENSG00000172534,ENSG00000185800,ENSG00000139190,ENSG00000170315,ENSG00000179526,ENSG00000170345,ENSG00000160991,ENSG00000114353,ENSG00000196924,ENSG00000215021,ENSG00000054356,ENSG00000134294,ENSG00000137880,ENSG00000096384,ENSG00000125952…
GO:0080135	regulation of cellular response to stress	biological_process	9.8436e-05	0.018495	67	1033	791	19500	ENSG00000135506,ENSG00000164362,ENSG00000165699,ENSG00000085733,ENSG00000071051,ENSG00000014216,ENSG00000109083,ENSG00000177169,ENSG00000032742,ENSG00000102882,ENSG00000135299,ENSG00000117410,ENSG00000087088,ENSG00000198563,ENSG00000171130,ENSG00000077463,ENSG00000204371,ENSG00000137275,ENSG00000172936,ENSG00000137309,ENSG00000171100,ENSG00000173327,ENSG00000160685,ENSG00000131871,ENSG00000158941…
GO:0044451	nucleoplasm part	cellular_component	9.9521e-05	0.018535	87	1033	1097	19500	ENSG00000129071,ENSG00000104852,ENSG00000011243,ENSG00000102034,ENSG00000116350,ENSG00000205323,ENSG00000109118,ENSG00000100142,ENSG00000197299,ENSG00000140553,ENSG00000204227,ENSG00000197976,ENSG00000106462,ENSG00000163349,ENSG00000181722,ENSG00000173933,ENSG00000048028,ENSG00000172534,ENSG00000188486,ENSG00000179335,ENSG00000071564,ENSG00000111642,ENSG00000140464,ENSG00000061273,ENSG00000101109…
GO:0043623	cellular protein complex assembly	biological_process	0.00010048	0.018549	56	1033	629	19500	ENSG00000167965,ENSG00000106682,ENSG00000042493,ENSG00000015285,ENSG00000120899,ENSG00000102879,ENSG00000087274,ENSG00000126216,ENSG00000130414,ENSG00000090339,ENSG00000130475,ENSG00000042753,ENSG00000106976,ENSG00000102125,ENSG00000140990,ENSG00000185627,ENSG00000052841,ENSG00000051523,ENSG00000197879,ENSG00000079805,ENSG00000149798,ENSG00000128283,ENSG00000136717,ENSG00000004478,ENSG00000141551…
GO:2001236	regulation of extrinsic apoptotic signaling pathway	biological_process	0.00010247	0.0187	21	1033	159	19500	ENSG00000090339,ENSG00000164362,ENSG00000092871,ENSG00000160570,ENSG00000160789,ENSG00000085733,ENSG00000135916,ENSG00000101109,ENSG00000091732,ENSG00000087088,ENSG00000171552,ENSG00000140464,ENSG00000173039,ENSG00000167895,ENSG00000170633,ENSG00000122641,ENSG00000068001,ENSG00000125826,ENSG00000137275,ENSG00000148737,ENSG00000084207
GO:1901700	response to oxygen-containing compound	biological_process	0.00010316	0.0187	115	1033	1542	19500	ENSG00000159674,ENSG00000078369,ENSG00000113742,ENSG00000102225,ENSG00000130522,ENSG00000110931,ENSG00000104814,ENSG00000068001,ENSG00000148737,ENSG00000105298,ENSG00000143882,ENSG00000158773,ENSG00000084207,ENSG00000125952,ENSG00000096384,ENSG00000167468,ENSG00000160211,ENSG00000127948,ENSG00000124160,ENSG00000196498,ENSG00000187486,ENSG00000135100,ENSG00000167815,ENSG00000185236,ENSG00000175866…
GO:0009057	macromolecule catabolic process	biological_process	0.00010393	0.0187	98	1033	1271	19500	ENSG00000179134,ENSG00000160570,ENSG00000088038,ENSG00000100083,ENSG00000181790,ENSG00000160803,ENSG00000168159,ENSG00000154473,ENSG00000096384,ENSG00000159202,ENSG00000082898,ENSG00000162298,ENSG00000068001,ENSG00000158796,ENSG00000185825,ENSG00000005007,ENSG00000204264,ENSG00000179526,ENSG00000110651,ENSG00000170315,ENSG00000196924,ENSG00000070770,ENSG00000133612,ENSG00000204351,ENSG00000048028…
GO:0030425	dendrite	cellular_component	0.00010537	0.018797	49	1033	529	19500	ENSG00000143740,ENSG00000198825,ENSG00000174871,ENSG00000175866,ENSG00000109083,ENSG00000181790,ENSG00000085733,ENSG00000258947,ENSG00000167461,ENSG00000141480,ENSG00000133216,ENSG00000149571,ENSG00000113758,ENSG00000068400,ENSG00000168081,ENSG00000174791,ENSG00000096384,ENSG00000125952,ENSG00000141837,ENSG00000137880,ENSG00000159788,ENSG00000187778,ENSG00000137497,ENSG00000078369,ENSG00000165802…
GO:0007265	Ras protein signal transduction	biological_process	0.00010624	0.018797	36	1033	349	19500	ENSG00000053524,ENSG00000089820,ENSG00000078369,ENSG00000172757,ENSG00000127533,ENSG00000099331,ENSG00000138757,ENSG00000141968,ENSG00000158321,ENSG00000132694,ENSG00000133216,ENSG00000174775,ENSG00000188277,ENSG00000160691,ENSG00000141522,ENSG00000198915,ENSG00000130427,ENSG00000107862,ENSG00000114993,ENSG00000068028,ENSG00000128283,ENSG00000048028,ENSG00000149798,ENSG00000136279,ENSG00000079805…
GO:0044257	cellular protein catabolic process	biological_process	0.00010983	0.019272	64	1033	749	19500	ENSG00000123159,ENSG00000104343,ENSG00000072609,ENSG00000042753,ENSG00000185627,ENSG00000116670,ENSG00000170633,ENSG00000156587,ENSG00000169242,ENSG00000160948,ENSG00000170185,ENSG00000079999,ENSG00000068903,ENSG00000114626,ENSG00000100991,ENSG00000132879,ENSG00000120899,ENSG00000087586,ENSG00000158941,ENSG00000131871,ENSG00000166851,ENSG00000171100,ENSG00000137275,ENSG00000127452,ENSG00000101266…
GO:0007264	small GTPase mediated signal transduction	biological_process	0.0001132	0.019687	46	1033	488	19500	ENSG00000068028,ENSG00000114993,ENSG00000155366,ENSG00000130427,ENSG00000107862,ENSG00000198915,ENSG00000149798,ENSG00000048028,ENSG00000128283,ENSG00000130052,ENSG00000079805,ENSG00000136279,ENSG00000120318,ENSG00000100092,ENSG00000039523,ENSG00000126458,ENSG00000105647,ENSG00000137843,ENSG00000146005,ENSG00000197283,ENSG00000213658,ENSG00000177106,ENSG00000129219,ENSG00000182957,ENSG00000124313…
GO:0051649	establishment of localization in cell	biological_process	0.00011405	0.019687	213	1033	3185	19500	ENSG00000103056,ENSG00000244038,ENSG00000105327,ENSG00000054654,ENSG00000083454,ENSG00000100300,ENSG00000186827,ENSG00000116350,ENSG00000196924,ENSG00000070770,ENSG00000146232,ENSG00000133612,ENSG00000011243,ENSG00000108953,ENSG00000140564,ENSG00000196230,ENSG00000171552,ENSG00000139190,ENSG00000140464,ENSG00000162517,ENSG00000106976,ENSG00000109854,ENSG00000142330,ENSG00000168397,ENSG00000187535…
GO:0071356	cellular response to tumor necrosis factor	biological_process	0.00011681	0.02	28	1033	246	19500	ENSG00000120949,ENSG00000054967,ENSG00000068001,ENSG00000051523,ENSG00000127528,ENSG00000105298,ENSG00000116815,ENSG00000125826,ENSG00000137275,ENSG00000084207,ENSG00000163349,ENSG00000176170,ENSG00000149600,ENSG00000173039,ENSG00000005206,ENSG00000157873,ENSG00000240505,ENSG00000102882,ENSG00000120899,ENSG00000104852,ENSG00000136699,ENSG00000137496,ENSG00000179526,ENSG00000090339,ENSG00000186827…
GO:0008092	cytoskeletal protein binding	molecular_function	0.00012383	0.021032	73	1033	888	19500	ENSG00000116786,ENSG00000196405,ENSG00000108518,ENSG00000167461,ENSG00000163995,ENSG00000100151,ENSG00000131504,ENSG00000185527,ENSG00000071051,ENSG00000173039,ENSG00000185340,ENSG00000196588,ENSG00000168071,ENSG00000172757,ENSG00000100242,ENSG00000149499,ENSG00000099331,ENSG00000177731,ENSG00000166851,ENSG00000179057,ENSG00000102409,ENSG00000087274,ENSG00000011485,ENSG00000102879,ENSG00000143546…
GO:0010648	negative regulation of cell communication	biological_process	0.00012568	0.021148	101	1033	1325	19500	ENSG00000085733,ENSG00000071051,ENSG00000170801,ENSG00000174871,ENSG00000160789,ENSG00000092871,ENSG00000100151,ENSG00000110801,ENSG00000133216,ENSG00000141480,ENSG00000164362,ENSG00000165699,ENSG00000197114,ENSG00000137275,ENSG00000101266,ENSG00000171100,ENSG00000138757,ENSG00000111186,ENSG00000135299,ENSG00000196588,ENSG00000087088,ENSG00000204371,ENSG00000159788,ENSG00000173039,ENSG00000137496…
GO:0044238	primary metabolic process	biological_process	0.00012734	0.021148	632	1033	10854	19500	ENSG00000062524,ENSG00000158941,ENSG00000182199,ENSG00000100991,ENSG00000011451,ENSG00000087586,ENSG00000166508,ENSG00000125871,ENSG00000170185,ENSG00000163884,ENSG00000005206,ENSG00000114626,ENSG00000132507,ENSG00000084764,ENSG00000128322,ENSG00000198055,ENSG00000066827,ENSG00000185499,ENSG00000181938,ENSG00000100151,ENSG00000167977,ENSG00000100721,ENSG00000165782,ENSG00000149639,ENSG00000175854…
GO:0009895	negative regulation of catabolic process	biological_process	0.0001275	0.021148	29	1033	260	19500	ENSG00000076555,ENSG00000158941,ENSG00000165699,ENSG00000100300,ENSG00000135506,ENSG00000181790,ENSG00000160803,ENSG00000070770,ENSG00000196924,ENSG00000110200,ENSG00000169242,ENSG00000166963,ENSG00000173039,ENSG00000140464,ENSG00000077463,ENSG00000068903,ENSG00000204371,ENSG00000140564,ENSG00000123159,ENSG00000166851,ENSG00000171100,ENSG00000154473,ENSG00000096384,ENSG00000101266,ENSG00000167110…
GO:0019941	modification-dependent protein catabolic process	biological_process	0.00014516	0.023876	55	1033	623	19500	ENSG00000116670,ENSG00000071539,ENSG00000163930,ENSG00000072609,ENSG00000104343,ENSG00000123159,ENSG00000125826,ENSG00000185627,ENSG00000114626,ENSG00000170185,ENSG00000068903,ENSG00000135924,ENSG00000079999,ENSG00000140464,ENSG00000048028,ENSG00000156587,ENSG00000170633,ENSG00000173821,ENSG00000160948,ENSG00000166963,ENSG00000141551,ENSG00000070770,ENSG00000133612,ENSG00000087586,ENSG00000120899…
GO:0016482	cytoplasmic transport	biological_process	0.00014619	0.023876	92	1033	1188	19500	ENSG00000157349,ENSG00000171100,ENSG00000063244,ENSG00000138757,ENSG00000142252,ENSG00000127533,ENSG00000102882,ENSG00000198563,ENSG00000087088,ENSG00000095321,ENSG00000174871,ENSG00000162236,ENSG00000131504,ENSG00000160789,ENSG00000135506,ENSG00000165699,ENSG00000156026,ENSG00000107745,ENSG00000135124,ENSG00000132507,ENSG00000064419,ENSG00000100401,ENSG00000167671,ENSG00000160948,ENSG00000176973…
GO:0018193	peptidyl-amino acid modification	biological_process	0.00014801	0.023988	93	1033	1204	19500	ENSG00000204371,ENSG00000187778,ENSG00000135441,ENSG00000173039,ENSG00000087088,ENSG00000114738,ENSG00000102882,ENSG00000173327,ENSG00000185324,ENSG00000166851,ENSG00000142186,ENSG00000197114,ENSG00000172939,ENSG00000137275,ENSG00000101266,ENSG00000080603,ENSG00000213923,ENSG00000100023,ENSG00000141480,ENSG00000100721,ENSG00000068971,ENSG00000133216,ENSG00000113648,ENSG00000107077,ENSG00000160691…
GO:0019725	cellular homeostasis	biological_process	0.00015303	0.024614	72	1033	879	19500	ENSG00000155660,ENSG00000131504,ENSG00000156026,ENSG00000107745,ENSG00000141837,ENSG00000171100,ENSG00000165905,ENSG00000142669,ENSG00000184470,ENSG00000104783,ENSG00000127533,ENSG00000077514,ENSG00000102882,ENSG00000136802,ENSG00000112759,ENSG00000117410,ENSG00000087088,ENSG00000178752,ENSG00000102805,ENSG00000171130,ENSG00000165125,ENSG00000187446,ENSG00000178719,ENSG00000120899,ENSG00000143546…
GO:0035556	intracellular signal transduction	biological_process	0.00016073	0.025657	181	1033	2656	19500	ENSG00000102882,ENSG00000172757,ENSG00000138031,ENSG00000114738,ENSG00000087088,ENSG00000173039,ENSG00000089820,ENSG00000172936,ENSG00000137275,ENSG00000101266,ENSG00000172939,ENSG00000185324,ENSG00000138757,ENSG00000180448,ENSG00000173327,ENSG00000092871,ENSG00000133216,ENSG00000132694,ENSG00000071051,ENSG00000149091,ENSG00000160691,ENSG00000213145,ENSG00000188277,ENSG00000188186,ENSG00000114993…
GO:0010033	response to organic substance	biological_process	0.00017183	0.027225	208	1033	3121	19500	ENSG00000166986,ENSG00000140564,ENSG00000204673,ENSG00000171552,ENSG00000128917,ENSG00000140464,ENSG00000135924,ENSG00000106976,ENSG00000142330,ENSG00000106462,ENSG00000163349,ENSG00000122641,ENSG00000079805,ENSG00000051523,ENSG00000244038,ENSG00000105327,ENSG00000083454,ENSG00000090339,ENSG00000100300,ENSG00000100142,ENSG00000197299,ENSG00000186827,ENSG00000110651,ENSG00000170345,ENSG00000179526…
GO:0010506	regulation of autophagy	biological_process	0.00017701	0.027837	30	1033	278	19500	ENSG00000165699,ENSG00000105647,ENSG00000100300,ENSG00000072310,ENSG00000149639,ENSG00000167461,ENSG00000103148,ENSG00000112561,ENSG00000070770,ENSG00000177169,ENSG00000196235,ENSG00000032742,ENSG00000126247,ENSG00000014216,ENSG00000109083,ENSG00000167965,ENSG00000085733,ENSG00000148356,ENSG00000160803,ENSG00000068903,ENSG00000171130,ENSG00000204371,ENSG00000117410,ENSG00000102882,ENSG00000188186…
GO:0010243	response to organonitrogen compound	biological_process	0.00018545	0.028951	70	1033	854	19500	ENSG00000141837,ENSG00000127528,ENSG00000172936,ENSG00000117410,ENSG00000204371,ENSG00000173039,ENSG00000171130,ENSG00000172209,ENSG00000138031,ENSG00000102882,ENSG00000165802,ENSG00000172757,ENSG00000160691,ENSG00000131504,ENSG00000108883,ENSG00000149639,ENSG00000165699,ENSG00000167461,ENSG00000197879,ENSG00000100401,ENSG00000135124,ENSG00000239282,ENSG00000123384,ENSG00000172482,ENSG00000163884…
GO:0071214	cellular response to abiotic stimulus	biological_process	0.00019481	0.030189	32	1033	306	19500	ENSG00000179583,ENSG00000171552,ENSG00000130427,ENSG00000188486,ENSG00000048028,ENSG00000120949,ENSG00000079805,ENSG00000051523,ENSG00000186642,ENSG00000100300,ENSG00000197299,ENSG00000125347,ENSG00000181218,ENSG00000134294,ENSG00000132518,ENSG00000187446,ENSG00000087088,ENSG00000078369,ENSG00000102882,ENSG00000165802,ENSG00000068001,ENSG00000172936,ENSG00000172939,ENSG00000122986,ENSG00000175854…
GO:0005765	lysosomal membrane	cellular_component	0.00020303	0.031091	35	1033	347	19500	ENSG00000143882,ENSG00000096384,ENSG00000181045,ENSG00000172232,ENSG00000254901,ENSG00000164535,ENSG00000102805,ENSG00000135441,ENSG00000073060,ENSG00000172354,ENSG00000161203,ENSG00000078369,ENSG00000198246,ENSG00000064601,ENSG00000162144,ENSG00000103148,ENSG00000165782,ENSG00000042753,ENSG00000135124,ENSG00000105700,ENSG00000100321,ENSG00000188186,ENSG00000167671,ENSG00000005206,ENSG00000198715…
GO:0008064	regulation of actin polymerization or depolymerization	biological_process	0.00020614	0.031091	21	1033	167	19500	ENSG00000196405,ENSG00000108518,ENSG00000102879,ENSG00000100151,ENSG00000087274,ENSG00000090339,ENSG00000042493,ENSG00000167965,ENSG00000085733,ENSG00000071051,ENSG00000015285,ENSG00000188277,ENSG00000120899,ENSG00000175866,ENSG00000172757,ENSG00000128283,ENSG00000149798,ENSG00000136717,ENSG00000100092,ENSG00000071127,ENSG00000197879
GO:0071310	cellular response to organic substance	biological_process	0.00020614	0.031091	171	1033	2499	19500	ENSG00000068001,ENSG00000162298,ENSG00000143882,ENSG00000084207,ENSG00000125952,ENSG00000143375,ENSG00000196498,ENSG00000125148,ENSG00000185236,ENSG00000108840,ENSG00000141551,ENSG00000204435,ENSG00000149428,ENSG00000110876,ENSG00000184058,ENSG00000172534,ENSG00000100321,ENSG00000013573,ENSG00000125826,ENSG00000034152,ENSG00000186642,ENSG00000160781,ENSG00000072310,ENSG00000105647,ENSG00000204264…
GO:0006511	ubiquitin-dependent protein catabolic process	biological_process	0.00020676	0.031091	54	1033	617	19500	ENSG00000170633,ENSG00000048028,ENSG00000141551,ENSG00000166963,ENSG00000173821,ENSG00000160948,ENSG00000135924,ENSG00000170185,ENSG00000068903,ENSG00000079999,ENSG00000140464,ENSG00000114626,ENSG00000123159,ENSG00000104343,ENSG00000072609,ENSG00000185627,ENSG00000125826,ENSG00000071539,ENSG00000116670,ENSG00000163930,ENSG00000158941,ENSG00000131871,ENSG00000179526,ENSG00000100991,ENSG00000170315…
GO:0032386	regulation of intracellular transport	biological_process	0.00020999	0.031091	45	1033	487	19500	ENSG00000167851,ENSG00000087088,ENSG00000137497,ENSG00000127533,ENSG00000014164,ENSG00000102882,ENSG00000138757,ENSG00000068001,ENSG00000185825,ENSG00000096384,ENSG00000082898,ENSG00000148737,ENSG00000135506,ENSG00000174775,ENSG00000131504,ENSG00000160014,ENSG00000185236,ENSG00000198825,ENSG00000130427,ENSG00000079999,ENSG00000140464,ENSG00000176973,ENSG00000108953,ENSG00000100401,ENSG00000173933…
GO:1901701	cellular response to oxygen-containing compound	biological_process	0.00021026	0.031091	80	1033	1012	19500	ENSG00000160685,ENSG00000011485,ENSG00000131871,ENSG00000062524,ENSG00000165816,ENSG00000013725,ENSG00000112799,ENSG00000120899,ENSG00000067225,ENSG00000105639,ENSG00000137496,ENSG00000123384,ENSG00000163884,ENSG00000068903,ENSG00000188186,ENSG00000197879,ENSG00000100401,ENSG00000239282,ENSG00000135124,ENSG00000122679,ENSG00000149639,ENSG00000165699,ENSG00000167461,ENSG00000112655,ENSG00000160691…
GO:0016740	transferase activity	molecular_function	0.00021087	0.031091	170	1033	2483	19500	ENSG00000170633,ENSG00000156587,ENSG00000179583,ENSG00000160408,ENSG00000172482,ENSG00000104343,ENSG00000143621,ENSG00000072609,ENSG00000173020,ENSG00000128311,ENSG00000130305,ENSG00000164068,ENSG00000075413,ENSG00000106992,ENSG00000120820,ENSG00000167797,ENSG00000158089,ENSG00000132879,ENSG00000120899,ENSG00000131446,ENSG00000077514,ENSG00000129465,ENSG00000095321,ENSG00000077463,ENSG00000187778…
GO:0032273	positive regulation of protein polymerization	biological_process	0.00021581	0.0316	17	1033	121	19500	ENSG00000197879,ENSG00000149798,ENSG00000128283,ENSG00000136717,ENSG00000137497,ENSG00000167965,ENSG00000085733,ENSG00000015285,ENSG00000071051,ENSG00000188277,ENSG00000175866,ENSG00000120899,ENSG00000102879,ENSG00000196405,ENSG00000108518,ENSG00000100151,ENSG00000090339
GO:0008154	actin polymerization or depolymerization	biological_process	0.0002182	0.031731	23	1033	192	19500	ENSG00000071127,ENSG00000100092,ENSG00000197879,ENSG00000052841,ENSG00000136717,ENSG00000172757,ENSG00000128283,ENSG00000149798,ENSG00000085733,ENSG00000015285,ENSG00000071051,ENSG00000042493,ENSG00000167965,ENSG00000120899,ENSG00000175866,ENSG00000188277,ENSG00000131504,ENSG00000100151,ENSG00000196405,ENSG00000108518,ENSG00000102879,ENSG00000090339,ENSG00000087274
GO:0030832	regulation of actin filament length	biological_process	0.0002241	0.032366	21	1033	168	19500	ENSG00000188277,ENSG00000120899,ENSG00000175866,ENSG00000167965,ENSG00000042493,ENSG00000085733,ENSG00000015285,ENSG00000071051,ENSG00000087274,ENSG00000090339,ENSG00000102879,ENSG00000196405,ENSG00000108518,ENSG00000100151,ENSG00000197879,ENSG00000100092,ENSG00000071127,ENSG00000149798,ENSG00000128283,ENSG00000172757,ENSG00000136717
GO:0043632	modification-dependent macromolecule catabolic process	biological_process	0.00022628	0.032461	55	1033	634	19500	ENSG00000120899,ENSG00000087586,ENSG00000133612,ENSG00000070770,ENSG00000100991,ENSG00000170315,ENSG00000179526,ENSG00000131871,ENSG00000158941,ENSG00000163930,ENSG00000071539,ENSG00000116670,ENSG00000185627,ENSG00000125826,ENSG00000123159,ENSG00000104343,ENSG00000072609,ENSG00000170185,ENSG00000135924,ENSG00000068903,ENSG00000079999,ENSG00000140464,ENSG00000114626,ENSG00000141551,ENSG00000173821…
GO:0006950	response to stress	biological_process	0.00023564	0.033505	259	1033	4027	19500	ENSG00000122641,ENSG00000071539,ENSG00000051523,ENSG00000086102,ENSG00000106462,ENSG00000196230,ENSG00000204673,ENSG00000171552,ENSG00000140464,ENSG00000108953,ENSG00000133612,ENSG00000187045,ENSG00000179526,ENSG00000152457,ENSG00000083454,ENSG00000186827,ENSG00000105327,ENSG00000104814,ENSG00000175482,ENSG00000167770,ENSG00000105298,ENSG00000096384,ENSG00000141968,ENSG00000159674,ENSG00000113742…
GO:0051169	nuclear transport	biological_process	0.00023672	0.033505	38	1033	391	19500	ENSG00000169180,ENSG00000165699,ENSG00000160789,ENSG00000142252,ENSG00000014164,ENSG00000198563,ENSG00000082898,ENSG00000148737,ENSG00000157349,ENSG00000137309,ENSG00000096384,ENSG00000169371,ENSG00000063244,ENSG00000068001,ENSG00000138757,ENSG00000157110,ENSG00000005007,ENSG00000162385,ENSG00000105647,ENSG00000102898,ENSG00000187446,ENSG00000205323,ENSG00000116350,ENSG00000133612,ENSG00000011243…
GO:0097194	execution phase of apoptosis	biological_process	0.00024472	0.034408	12	1033	69	19500	ENSG00000142330,ENSG00000179526,ENSG00000136305,ENSG00000189060,ENSG00000170633,ENSG00000105327,ENSG00000100813,ENSG00000160570,ENSG00000092871,ENSG00000068903,ENSG00000171552,ENSG00000087088
GO:0097367	carbohydrate derivative binding	molecular_function	0.00025069	0.035016	154	1033	2222	19500	ENSG00000166851,ENSG00000142186,ENSG00000129465,ENSG00000123064,ENSG00000099331,ENSG00000088325,ENSG00000100228,ENSG00000185527,ENSG00000108883,ENSG00000080603,ENSG00000059758,ENSG00000167461,ENSG00000136143,ENSG00000076555,ENSG00000114770,ENSG00000258947,ENSG00000173020,ENSG00000197879,ENSG00000139832,ENSG00000143621,ENSG00000104343,ENSG00000135124,ENSG00000184640,ENSG00000179583,ENSG00000123384…
GO:0009967	positive regulation of signal transduction	biological_process	0.00025692	0.035651	112	1033	1529	19500	ENSG00000114353,ENSG00000085872,ENSG00000142405,ENSG00000184381,ENSG00000196924,ENSG00000215021,ENSG00000135916,ENSG00000170315,ENSG00000169692,ENSG00000128284,ENSG00000110651,ENSG00000011422,ENSG00000179526,ENSG00000090339,ENSG00000083454,ENSG00000105647,ENSG00000142733,ENSG00000105327,ENSG00000065361,ENSG00000122641,ENSG00000051523,ENSG00000087266,ENSG00000125826,ENSG00000034152,ENSG00000106462…
GO:0009267	cellular response to starvation	biological_process	0.00025997	0.03584	37	1033	379	19500	ENSG00000167965,ENSG00000148356,ENSG00000070770,ENSG00000134294,ENSG00000179364,ENSG00000165861,ENSG00000072310,ENSG00000039523,ENSG00000100300,ENSG00000168397,ENSG00000166986,ENSG00000167671,ENSG00000160948,ENSG00000188186,ENSG00000068903,ENSG00000126247,ENSG00000014216,ENSG00000109083,ENSG00000160803,ENSG00000085733,ENSG00000032742,ENSG00000196235,ENSG00000177169,ENSG00000103148,ENSG00000100151…
GO:0005874	microtubule	cellular_component	0.00026368	0.036042	39	1033	407	19500	ENSG00000141551,ENSG00000004478,ENSG00000166963,ENSG00000068903,ENSG00000184640,ENSG00000156050,ENSG00000196230,ENSG00000068028,ENSG00000141933,ENSG00000084764,ENSG00000106976,ENSG00000126214,ENSG00000079805,ENSG00000100246,ENSG00000137171,ENSG00000135912,ENSG00000126216,ENSG00000167797,ENSG00000131871,ENSG00000142945,ENSG00000196169,ENSG00000087586,ENSG00000214021,ENSG00000149499,ENSG00000089820…
GO:0032869	cellular response to insulin stimulus	biological_process	0.00026483	0.036042	24	1033	207	19500	ENSG00000108840,ENSG00000175866,ENSG00000160691,ENSG00000114353,ENSG00000067225,ENSG00000165816,ENSG00000167461,ENSG00000124160,ENSG00000072310,ENSG00000149639,ENSG00000131871,ENSG00000160685,ENSG00000165699,ENSG00000105647,ENSG00000142330,ENSG00000084207,ENSG00000143882,ENSG00000158773,ENSG00000197879,ENSG00000166986,ENSG00000117410,ENSG00000173039,ENSG00000171130,ENSG00000163884
GO:0043412	macromolecule modification	biological_process	0.00026875	0.036342	276	1033	4335	19500	ENSG00000108953,ENSG00000119771,ENSG00000061273,ENSG00000204673,ENSG00000130725,ENSG00000140464,ENSG00000106462,ENSG00000122641,ENSG00000071539,ENSG00000135912,ENSG00000122390,ENSG00000179526,ENSG00000007541,ENSG00000185917,ENSG00000148335,ENSG00000099991,ENSG00000107719,ENSG00000102225,ENSG00000160446,ENSG00000105298,ENSG00000127585,ENSG00000096384,ENSG00000104814,ENSG00000167770,ENSG00000100298…
GO:0023057	negative regulation of signaling	biological_process	0.00027087	0.036398	98	1033	1305	19500	ENSG00000129657,ENSG00000239282,ENSG00000100092,ENSG00000185499,ENSG00000116670,ENSG00000173020,ENSG00000176973,ENSG00000169242,ENSG00000169727,ENSG00000170633,ENSG00000123384,ENSG00000130427,ENSG00000187446,ENSG00000137496,ENSG00000178719,ENSG00000197283,ENSG00000120899,ENSG00000120057,ENSG00000157227,ENSG00000075413,ENSG00000146674,ENSG00000188779,ENSG00000131871,ENSG00000158941,ENSG00000197114…
GO:1901264	carbohydrate derivative transport	biological_process	0.00027334	0.036499	11	1033	60	19500	ENSG00000125648,ENSG00000137275,ENSG00000198246,ENSG00000102100,ENSG00000157593,ENSG00000176087,ENSG00000112759,ENSG00000143774,ENSG00000073060,ENSG00000181830,ENSG00000169241
GO:0071496	cellular response to external stimulus	biological_process	0.00027675	0.036723	47	1033	522	19500	ENSG00000032742,ENSG00000141522,ENSG00000177169,ENSG00000196235,ENSG00000126247,ENSG00000014216,ENSG00000109083,ENSG00000160803,ENSG00000085733,ENSG00000165699,ENSG00000103148,ENSG00000100151,ENSG00000160360,ENSG00000110931,ENSG00000084207,ENSG00000171100,ENSG00000125952,ENSG00000143882,ENSG00000158773,ENSG00000172936,ENSG00000204371,ENSG00000185340,ENSG00000171130,ENSG00000117410,ENSG00000102882…
GO:0016604	nuclear body	cellular_component	0.00028775	0.037946	62	1033	745	19500	ENSG00000204371,ENSG00000102901,ENSG00000198563,ENSG00000100813,ENSG00000182872,ENSG00000184900,ENSG00000142252,ENSG00000010318,ENSG00000142669,ENSG00000063244,ENSG00000141644,ENSG00000125952,ENSG00000105298,ENSG00000213619,ENSG00000082898,ENSG00000148737,ENSG00000080603,ENSG00000118655,ENSG00000168488,ENSG00000164362,ENSG00000189060,ENSG00000196498,ENSG00000125817,ENSG00000160789,ENSG00000168874…
GO:0006464	cellular protein modification process	biological_process	0.00029725	0.038717	265	1033	4147	19500	ENSG00000110931,ENSG00000176383,ENSG00000167851,ENSG00000171621,ENSG00000184900,ENSG00000198825,ENSG00000145214,ENSG00000147533,ENSG00000160211,ENSG00000100897,ENSG00000174775,ENSG00000127948,ENSG00000163812,ENSG00000163349,ENSG00000168397,ENSG00000162517,ENSG00000141933,ENSG00000198915,ENSG00000135924,ENSG00000048028,ENSG00000173821,ENSG00000070770,ENSG00000011243,ENSG00000196576,ENSG00000110651…
GO:0036211	protein modification process	biological_process	0.00029725	0.038717	265	1033	4147	19500	ENSG00000135441,ENSG00000159479,ENSG00000129465,ENSG00000077463,ENSG00000165802,ENSG00000063244,ENSG00000110786,ENSG00000142186,ENSG00000197114,ENSG00000166851,ENSG00000171100,ENSG00000135506,ENSG00000165699,ENSG00000059758,ENSG00000068971,ENSG00000089053,ENSG00000130175,ENSG00000088325,ENSG00000113648,ENSG00000160408,ENSG00000169242,ENSG00000160948,ENSG00000170633,ENSG00000116670,ENSG00000185627…
GO:0016567	protein ubiquitination	biological_process	0.0003065	0.039678	67	1033	823	19500	ENSG00000159479,ENSG00000135108,ENSG00000183655,ENSG00000110200,ENSG00000187147,ENSG00000063244,ENSG00000166851,ENSG00000127452,ENSG00000101266,ENSG00000182670,ENSG00000100023,ENSG00000135506,ENSG00000141480,ENSG00000092871,ENSG00000089053,ENSG00000079999,ENSG00000176170,ENSG00000156587,ENSG00000170633,ENSG00000160948,ENSG00000108578,ENSG00000116670,ENSG00000043143,ENSG00000072609,ENSG00000104343…
GO:0016772	transferase activity, transferring phosphorus-containing groups	molecular_function	0.0003111	0.039821	82	1033	1056	19500	ENSG00000065361,ENSG00000172992,ENSG00000161217,ENSG00000090581,ENSG00000034152,ENSG00000163349,ENSG00000166169,ENSG00000141551,ENSG00000204435,ENSG00000179335,ENSG00000132518,ENSG00000011243,ENSG00000070770,ENSG00000149923,ENSG00000186184,ENSG00000143774,ENSG00000100142,ENSG00000105647,ENSG00000142733,ENSG00000137843,ENSG00000124357,ENSG00000110931,ENSG00000104814,ENSG00000175482,ENSG00000113716…
GO:0051603	proteolysis involved in cellular protein catabolic process	biological_process	0.00031154	0.039821	59	1033	702	19500	ENSG00000131871,ENSG00000204264,ENSG00000158941,ENSG00000087586,ENSG00000120899,ENSG00000132879,ENSG00000070770,ENSG00000133612,ENSG00000170315,ENSG00000100991,ENSG00000179526,ENSG00000114626,ENSG00000170185,ENSG00000079999,ENSG00000068903,ENSG00000140464,ENSG00000135924,ENSG00000173821,ENSG00000160948,ENSG00000166963,ENSG00000169242,ENSG00000141551,ENSG00000156587,ENSG00000048028,ENSG00000170633…
GO:1902531	regulation of intracellular signal transduction	biological_process	0.00031323	0.039821	131	1033	1849	19500	ENSG00000071054,ENSG00000017260,ENSG00000198825,ENSG00000141522,ENSG00000258839,ENSG00000145214,ENSG00000158321,ENSG00000174775,ENSG00000159445,ENSG00000104814,ENSG00000185825,ENSG00000071205,ENSG00000141968,ENSG00000096384,ENSG00000148737,ENSG00000213619,ENSG00000167851,ENSG00000196924,ENSG00000070770,ENSG00000179526,ENSG00000110651,ENSG00000126458,ENSG00000083454,ENSG00000090339,ENSG00000105327…
GO:0019899	enzyme binding	molecular_function	0.00032649	0.04126	138	1033	1967	19500	ENSG00000079805,ENSG00000142512,ENSG00000106976,ENSG00000171552,ENSG00000166938,ENSG00000130733,ENSG00000140464,ENSG00000196230,ENSG00000140564,ENSG00000061273,ENSG00000108953,ENSG00000196924,ENSG00000011243,ENSG00000105327,ENSG00000167770,ENSG00000096384,ENSG00000158773,ENSG00000137880,ENSG00000100139,ENSG00000148737,ENSG00000082898,ENSG00000172354,ENSG00000078369,ENSG00000130522,ENSG00000184900…
GO:0005524	ATP binding	molecular_function	0.00032937	0.041377	109	1033	1490	19500	ENSG00000011485,ENSG00000163344,ENSG00000075413,ENSG00000062524,ENSG00000106992,ENSG00000105639,ENSG00000059573,ENSG00000067225,ENSG00000120899,ENSG00000087586,ENSG00000142945,ENSG00000179583,ENSG00000176170,ENSG00000266173,ENSG00000156587,ENSG00000166508,ENSG00000173020,ENSG00000198055,ENSG00000198909,ENSG00000197879,ENSG00000143621,ENSG00000104343,ENSG00000135124,ENSG00000080603,ENSG00000059758…
GO:0005774	vacuolar membrane	cellular_component	0.00033599	0.041838	38	1033	398	19500	ENSG00000167671,ENSG00000188186,ENSG00000198715,ENSG00000005206,ENSG00000123384,ENSG00000171298,ENSG00000040487,ENSG00000042753,ENSG00000135124,ENSG00000136710,ENSG00000100321,ENSG00000105700,ENSG00000244038,ENSG00000107331,ENSG00000169682,ENSG00000135916,ENSG00000150967,ENSG00000197043,ENSG00000101294,ENSG00000164535,ENSG00000172354,ENSG00000073060,ENSG00000135441,ENSG00000102805,ENSG00000078369…
GO:0032868	response to insulin	biological_process	0.00033698	0.041838	28	1033	262	19500	ENSG00000117410,ENSG00000163884,ENSG00000173039,ENSG00000171130,ENSG00000166986,ENSG00000197879,ENSG00000158773,ENSG00000143882,ENSG00000142330,ENSG00000125952,ENSG00000084207,ENSG00000160685,ENSG00000149639,ENSG00000072310,ENSG00000131871,ENSG00000090339,ENSG00000165699,ENSG00000105647,ENSG00000165816,ENSG00000054356,ENSG00000124160,ENSG00000167461,ENSG00000114353,ENSG00000175866,ENSG00000160691…
GO:0023056	positive regulation of signaling	biological_process	0.00034679	0.042806	122	1033	1705	19500	ENSG00000204435,ENSG00000141551,ENSG00000108953,ENSG00000184058,ENSG00000155366,ENSG00000151208,ENSG00000171552,ENSG00000198915,ENSG00000128917,ENSG00000140464,ENSG00000106976,ENSG00000125826,ENSG00000034152,ENSG00000087266,ENSG00000142330,ENSG00000106462,ENSG00000122641,ENSG00000065361,ENSG00000051523,ENSG00000142733,ENSG00000105327,ENSG00000090339,ENSG00000083454,ENSG00000105647,ENSG00000128284…
GO:0015931	nucleobase-containing compound transport	biological_process	0.00035862	0.043946	25	1033	224	19500	ENSG00000116350,ENSG00000205323,ENSG00000011243,ENSG00000198246,ENSG00000157593,ENSG00000102898,ENSG00000176087,ENSG00000165699,ENSG00000005007,ENSG00000128311,ENSG00000162385,ENSG00000169371,ENSG00000125648,ENSG00000063244,ENSG00000197879,ENSG00000138757,ENSG00000157349,ENSG00000132507,ENSG00000082898,ENSG00000137275,ENSG00000102100,ENSG00000198563,ENSG00000112759,ENSG00000181830,ENSG00000014164
GO:0032446	protein modification by small protein conjugation	biological_process	0.00036016	0.043946	70	1033	874	19500	ENSG00000162517,ENSG00000125826,ENSG00000071539,ENSG00000119771,ENSG00000173821,ENSG00000091732,ENSG00000130725,ENSG00000061273,ENSG00000140464,ENSG00000135924,ENSG00000170315,ENSG00000179526,ENSG00000070770,ENSG00000204227,ENSG00000100300,ENSG00000167110,ENSG00000146054,ENSG00000159202,ENSG00000127585,ENSG00000154473,ENSG00000096384,ENSG00000167770,ENSG00000162298,ENSG00000114745,ENSG00000185130…
GO:0006810	transport	biological_process	0.00036232	0.043956	311	1033	4978	19500	ENSG00000185236,ENSG00000157514,ENSG00000069424,ENSG00000172432,ENSG00000157593,ENSG00000145740,ENSG00000176087,ENSG00000162383,ENSG00000171121,ENSG00000169180,ENSG00000197119,ENSG00000162298,ENSG00000181045,ENSG00000054116,ENSG00000084207,ENSG00000102100,ENSG00000166394,ENSG00000174791,ENSG00000143882,ENSG00000114353,ENSG00000205323,ENSG00000085872,ENSG00000215021,ENSG00000142405,ENSG00000128284…
GO:0016020	membrane	cellular_component	0.00036769	0.044355	559	1033	9547	19500	ENSG00000160781,ENSG00000126216,ENSG00000107331,ENSG00000134824,ENSG00000085872,ENSG00000114353,ENSG00000099904,ENSG00000167850,ENSG00000102898,ENSG00000011422,ENSG00000167460,ENSG00000151208,ENSG00000155366,ENSG00000187954,ENSG00000136717,ENSG00000050426,ENSG00000149792,ENSG00000149428,ENSG00000175920,ENSG00000100321,ENSG00000065361,ENSG00000090581,ENSG00000140990,ENSG00000149782,ENSG00000143375…
GO:0006913	nucleocytoplasmic transport	biological_process	0.00037142	0.044552	37	1033	386	19500	ENSG00000108953,ENSG00000176973,ENSG00000266173,ENSG00000140464,ENSG00000079999,ENSG00000132507,ENSG00000186642,ENSG00000109854,ENSG00000064419,ENSG00000173933,ENSG00000100401,ENSG00000005007,ENSG00000157110,ENSG00000162385,ENSG00000105647,ENSG00000187446,ENSG00000102898,ENSG00000205323,ENSG00000116350,ENSG00000133612,ENSG00000011243,ENSG00000146232,ENSG00000215021,ENSG00000142252,ENSG00000014164…
GO:0031330	negative regulation of cellular catabolic process	biological_process	0.00037781	0.045064	24	1033	212	19500	ENSG00000160803,ENSG00000070770,ENSG00000076555,ENSG00000100300,ENSG00000165699,ENSG00000158941,ENSG00000167110,ENSG00000101266,ENSG00000154473,ENSG00000171100,ENSG00000096384,ENSG00000123159,ENSG00000166851,ENSG00000116670,ENSG00000274897,ENSG00000071539,ENSG00000166963,ENSG00000169242,ENSG00000110200,ENSG00000140564,ENSG00000204371,ENSG00000068903,ENSG00000077463,ENSG00000140464
GO:0034612	response to tumor necrosis factor	biological_process	0.00038069	0.045154	28	1033	264	19500	ENSG00000090339,ENSG00000186827,ENSG00000092871,ENSG00000187486,ENSG00000100721,ENSG00000120899,ENSG00000136699,ENSG00000104852,ENSG00000137496,ENSG00000179526,ENSG00000176170,ENSG00000005206,ENSG00000173039,ENSG00000149600,ENSG00000157873,ENSG00000102882,ENSG00000240505,ENSG00000120949,ENSG00000068001,ENSG00000051523,ENSG00000054967,ENSG00000137275,ENSG00000125826,ENSG00000116815,ENSG00000105298…
GO:0036477	somatodendritic compartment	cellular_component	0.00039684	0.046807	61	1033	739	19500	ENSG00000137497,ENSG00000078369,ENSG00000159788,ENSG00000187778,ENSG00000158555,ENSG00000113742,ENSG00000165802,ENSG00000104783,ENSG00000068400,ENSG00000168081,ENSG00000113758,ENSG00000137880,ENSG00000141837,ENSG00000113763,ENSG00000174791,ENSG00000125952,ENSG00000096384,ENSG00000149571,ENSG00000258947,ENSG00000187486,ENSG00000141480,ENSG00000167461,ENSG00000133216,ENSG00000198825,ENSG00000174871…
GO:0030041	actin filament polymerization	biological_process	0.00040039	0.046965	20	1033	163	19500	ENSG00000128283,ENSG00000149798,ENSG00000136717,ENSG00000052841,ENSG00000197879,ENSG00000087274,ENSG00000090339,ENSG00000196405,ENSG00000108518,ENSG00000102879,ENSG00000100151,ENSG00000188277,ENSG00000131504,ENSG00000175866,ENSG00000120899,ENSG00000042493,ENSG00000167965,ENSG00000085733,ENSG00000015285,ENSG00000071051
GO:0042995	cell projection	cellular_component	0.00041836	0.048804	140	1033	2012	19500	ENSG00000054654,ENSG00000135912,ENSG00000196924,ENSG00000160991,ENSG00000170345,ENSG00000179526,ENSG00000139190,ENSG00000144488,ENSG00000108953,ENSG00000079805,ENSG00000187535,ENSG00000100246,ENSG00000051523,ENSG00000124772,ENSG00000141933,ENSG00000106976,ENSG00000158321,ENSG00000187486,ENSG00000135100,ENSG00000198825,ENSG00000007174,ENSG00000175866,ENSG00000137497,ENSG00000078369,ENSG00000113742…
GO:0030554	adenyl nucleotide binding	molecular_function	0.00043527	0.050077	111	1033	1534	19500	ENSG00000198563,ENSG00000123064,ENSG00000129465,ENSG00000073331,ENSG00000099331,ENSG00000117266,ENSG00000138031,ENSG00000114738,ENSG00000102882,ENSG00000173327,ENSG00000185324,ENSG00000142186,ENSG00000172939,ENSG00000157349,ENSG00000101266,ENSG00000137275,ENSG00000166851,ENSG00000130717,ENSG00000080603,ENSG00000059758,ENSG00000213923,ENSG00000076555,ENSG00000114770,ENSG00000133216,ENSG00000136143…
GO:0071375	cellular response to peptide hormone stimulus	biological_process	0.00043753	0.050077	30	1033	293	19500	ENSG00000149639,ENSG00000131871,ENSG00000072310,ENSG00000160685,ENSG00000105647,ENSG00000165699,ENSG00000165816,ENSG00000127948,ENSG00000167461,ENSG00000124160,ENSG00000160691,ENSG00000175866,ENSG00000114353,ENSG00000105639,ENSG00000067225,ENSG00000108840,ENSG00000117410,ENSG00000163884,ENSG00000173039,ENSG00000171130,ENSG00000166986,ENSG00000138031,ENSG00000197879,ENSG00000100401,ENSG00000051523…
GO:1903050	regulation of proteolysis involved in cellular protein catabolic process	biological_process	0.00043847	0.050077	26	1033	240	19500	ENSG00000101266,ENSG00000096384,ENSG00000171100,ENSG00000072609,ENSG00000154473,ENSG00000166851,ENSG00000123159,ENSG00000185825,ENSG00000116670,ENSG00000274897,ENSG00000071539,ENSG00000166963,ENSG00000141551,ENSG00000169242,ENSG00000110200,ENSG00000135924,ENSG00000068903,ENSG00000140464,ENSG00000079999,ENSG00000160803,ENSG00000170315,ENSG00000120899,ENSG00000087586,ENSG00000070770,ENSG00000158941…
GO:0007010	cytoskeleton organization	biological_process	0.00043872	0.050077	93	1033	1243	19500	ENSG00000137843,ENSG00000126216,ENSG00000090339,ENSG00000054654,ENSG00000167460,ENSG00000015285,ENSG00000124313,ENSG00000196924,ENSG00000196169,ENSG00000128283,ENSG00000166780,ENSG00000004478,ENSG00000144488,ENSG00000141551,ENSG00000136717,ENSG00000166963,ENSG00000155366,ENSG00000068028,ENSG00000196230,ENSG00000120318,ENSG00000142330,ENSG00000141933,ENSG00000099849,ENSG00000174775,ENSG00000158321…
GO:0010638	positive regulation of organelle organization	biological_process	0.00044306	0.050303	51	1033	592	19500	ENSG00000136717,ENSG00000108953,ENSG00000149798,ENSG00000128283,ENSG00000155366,ENSG00000184640,ENSG00000140464,ENSG00000068903,ENSG00000163930,ENSG00000197879,ENSG00000185499,ENSG00000013573,ENSG00000155906,ENSG00000105327,ENSG00000102879,ENSG00000072310,ENSG00000090339,ENSG00000160685,ENSG00000015285,ENSG00000148356,ENSG00000167965,ENSG00000011422,ENSG00000120899,ENSG00000182768,ENSG00000087586…
GO:0019538	protein metabolic process	biological_process	0.00045167	0.051008	367	1033	6004	19500	ENSG00000073331,ENSG00000132329,ENSG00000198563,ENSG00000171703,ENSG00000183655,ENSG00000114738,ENSG00000127415,ENSG00000135108,ENSG00000110200,ENSG00000117266,ENSG00000158062,ENSG00000173327,ENSG00000166278,ENSG00000125447,ENSG00000101266,ENSG00000102409,ENSG00000182670,ENSG00000100721,ENSG00000167977,ENSG00000100151,ENSG00000185453,ENSG00000160404,ENSG00000160691,ENSG00000112655,ENSG00000177169…
GO:1903362	regulation of cellular protein catabolic process	biological_process	0.00045728	0.051368	28	1033	267	19500	ENSG00000158941,ENSG00000213923,ENSG00000070770,ENSG00000120899,ENSG00000087586,ENSG00000160803,ENSG00000110651,ENSG00000170315,ENSG00000135924,ENSG00000068903,ENSG00000079999,ENSG00000140464,ENSG00000140564,ENSG00000110200,ENSG00000166963,ENSG00000169242,ENSG00000141551,ENSG00000116670,ENSG00000274897,ENSG00000071539,ENSG00000185825,ENSG00000154473,ENSG00000171100,ENSG00000072609,ENSG00000096384…
GO:0000323	lytic vacuole	cellular_component	0.00046582	0.05162	56	1033	668	19500	ENSG00000162144,ENSG00000103148,ENSG00000101425,ENSG00000149927,ENSG00000158887,ENSG00000185339,ENSG00000165782,ENSG00000103066,ENSG00000014216,ENSG00000064601,ENSG00000198246,ENSG00000106348,ENSG00000127415,ENSG00000196743,ENSG00000164535,ENSG00000172354,ENSG00000073060,ENSG00000135441,ENSG00000102805,ENSG00000161203,ENSG00000164687,ENSG00000078369,ENSG00000096384,ENSG00000143882,ENSG00000181045…
GO:0005764	lysosome	cellular_component	0.00046582	0.05162	56	1033	668	19500	ENSG00000213658,ENSG00000101294,ENSG00000197043,ENSG00000150967,ENSG00000168890,ENSG00000135916,ENSG00000169682,ENSG00000086730,ENSG00000107331,ENSG00000244038,ENSG00000166900,ENSG00000105327,ENSG00000105700,ENSG00000100321,ENSG00000136710,ENSG00000135124,ENSG00000042753,ENSG00000122679,ENSG00000171298,ENSG00000040487,ENSG00000196230,ENSG00000123384,ENSG00000005206,ENSG00000122359,ENSG00000198715…
GO:1901653	cellular response to peptide	biological_process	0.00046682	0.05162	33	1033	335	19500	ENSG00000124160,ENSG00000167461,ENSG00000127948,ENSG00000165699,ENSG00000149639,ENSG00000108840,ENSG00000175866,ENSG00000160691,ENSG00000138031,ENSG00000173039,ENSG00000171130,ENSG00000117410,ENSG00000143882,ENSG00000158773,ENSG00000084207,ENSG00000125952,ENSG00000141837,ENSG00000127528,ENSG00000165816,ENSG00000105647,ENSG00000160685,ENSG00000131871,ENSG00000072310,ENSG00000067225,ENSG00000105639…
GO:0009968	negative regulation of signal transduction	biological_process	0.00048909	0.053802	89	1033	1183	19500	ENSG00000170633,ENSG00000169727,ENSG00000169242,ENSG00000176973,ENSG00000130427,ENSG00000123384,ENSG00000100092,ENSG00000129657,ENSG00000239282,ENSG00000185499,ENSG00000116670,ENSG00000173020,ENSG00000146674,ENSG00000075413,ENSG00000158941,ENSG00000131871,ENSG00000188779,ENSG00000187446,ENSG00000137496,ENSG00000178719,ENSG00000157227,ENSG00000197283,ENSG00000120057,ENSG00000111186,ENSG00000135299…
GO:1901698	response to nitrogen compound	biological_process	0.00049673	0.05405	75	1033	962	19500	ENSG00000170345,ENSG00000111361,ENSG00000116350,ENSG00000114353,ENSG00000054356,ENSG00000105647,ENSG00000197299,ENSG00000083454,ENSG00000090339,ENSG00000072310,ENSG00000100300,ENSG00000186642,ENSG00000142330,ENSG00000106462,ENSG00000106976,ENSG00000013573,ENSG00000051523,ENSG00000079805,ENSG00000166986,ENSG00000171552,ENSG00000108840,ENSG00000145214,ENSG00000160014,ENSG00000175866,ENSG00000196498…
GO:0060589	nucleoside-triphosphatase regulator activity	molecular_function	0.00049763	0.05405	34	1033	350	19500	ENSG00000135924,ENSG00000114993,ENSG00000149798,ENSG00000128283,ENSG00000169727,ENSG00000100401,ENSG00000130052,ENSG00000100092,ENSG00000120318,ENSG00000105647,ENSG00000164050,ENSG00000138835,ENSG00000133612,ENSG00000197283,ENSG00000141258,ENSG00000108262,ENSG00000015285,ENSG00000089820,ENSG00000159788,ENSG00000242247,ENSG00000213654,ENSG00000099331,ENSG00000180448,ENSG00000184060,ENSG00000160360…
GO:0044267	cellular protein metabolic process	biological_process	0.00049954	0.05405	328	1033	5306	19500	ENSG00000100767,ENSG00000121578,ENSG00000064601,ENSG00000100023,ENSG00000117682,ENSG00000213923,ENSG00000092871,ENSG00000110801,ENSG00000133216,ENSG00000185324,ENSG00000172939,ENSG00000137275,ENSG00000172936,ENSG00000167889,ENSG00000196588,ENSG00000161203,ENSG00000087088,ENSG00000173039,ENSG00000168701,ENSG00000172757,ENSG00000132510,ENSG00000102882,ENSG00000197283,ENSG00000178498,ENSG00000213658…
GO:0097458	neuron part	cellular_component	0.00050152	0.05405	100	1033	1361	19500	ENSG00000133216,ENSG00000167461,ENSG00000141480,ENSG00000258947,ENSG00000108518,ENSG00000100151,ENSG00000149927,ENSG00000165699,ENSG00000185527,ENSG00000109083,ENSG00000085733,ENSG00000088325,ENSG00000174871,ENSG00000177169,ENSG00000104783,ENSG00000165802,ENSG00000040199,ENSG00000034053,ENSG00000187778,ENSG00000159788,ENSG00000089820,ENSG00000135441,ENSG00000113763,ENSG00000141837,ENSG00000068400…
GO:0032559	adenyl ribonucleotide binding	molecular_function	0.00050592	0.054128	110	1033	1524	19500	ENSG00000160404,ENSG00000088325,ENSG00000177169,ENSG00000112655,ENSG00000004455,ENSG00000149091,ENSG00000067596,ENSG00000213923,ENSG00000080603,ENSG00000059758,ENSG00000130717,ENSG00000136143,ENSG00000076555,ENSG00000133216,ENSG00000114770,ENSG00000185324,ENSG00000173327,ENSG00000166851,ENSG00000137275,ENSG00000101266,ENSG00000172939,ENSG00000142186,ENSG00000157349,ENSG00000129465,ENSG00000073331…
GO:0031345	negative regulation of cell projection organization	biological_process	0.00050859	0.054128	20	1033	166	19500	ENSG00000165699,ENSG00000196405,ENSG00000133216,ENSG00000130175,ENSG00000071054,ENSG00000198825,ENSG00000139437,ENSG00000141522,ENSG00000197283,ENSG00000184014,ENSG00000135916,ENSG00000089820,ENSG00000123384,ENSG00000169242,ENSG00000004478,ENSG00000114745,ENSG00000185324,ENSG00000079805,ENSG00000120949,ENSG00000078699
GO:0016363	nuclear matrix	cellular_component	0.00050989	0.054128	15	1033	107	19500	ENSG00000215021,ENSG00000011243,ENSG00000145214,ENSG00000141644,ENSG00000198563,ENSG00000111676,ENSG00000137497,ENSG00000159788,ENSG00000140464,ENSG00000197299,ENSG00000204435,ENSG00000165702,ENSG00000196498,ENSG00000165802,ENSG00000172757
GO:0016236	macroautophagy	biological_process	0.000533	0.056299	29	1033	283	19500	ENSG00000160803,ENSG00000085733,ENSG00000148356,ENSG00000167965,ENSG00000126247,ENSG00000014216,ENSG00000109083,ENSG00000032742,ENSG00000196235,ENSG00000177169,ENSG00000070770,ENSG00000103148,ENSG00000179364,ENSG00000072310,ENSG00000100300,ENSG00000165699,ENSG00000165861,ENSG00000171100,ENSG00000168397,ENSG00000143882,ENSG00000160360,ENSG00000110931,ENSG00000160948,ENSG00000167671,ENSG00000188186…
GO:0009136	purine nucleoside diphosphate biosynthetic process	biological_process	0.00055835	0.058062	3	1033	4	19500	ENSG00000106992,ENSG00000004455,ENSG00000143774
GO:0009180	purine ribonucleoside diphosphate biosynthetic process	biological_process	0.00055835	0.058062	3	1033	4	19500	ENSG00000106992,ENSG00000143774,ENSG00000004455
GO:0009188	ribonucleoside diphosphate biosynthetic process	biological_process	0.00055835	0.058062	3	1033	4	19500	ENSG00000143774,ENSG00000004455,ENSG00000106992
GO:0032435	negative regulation of proteasomal ubiquitin-dependent protein catabolic process	biological_process	0.00056063	0.058062	11	1033	65	19500	ENSG00000166851,ENSG00000123159,ENSG00000154473,ENSG00000171100,ENSG00000096384,ENSG00000071539,ENSG00000274897,ENSG00000116670,ENSG00000110200,ENSG00000166963,ENSG00000158941
GO:0031668	cellular response to extracellular stimulus	biological_process	0.00057176	0.058927	41	1033	452	19500	ENSG00000110931,ENSG00000160360,ENSG00000158773,ENSG00000143882,ENSG00000171100,ENSG00000125952,ENSG00000084207,ENSG00000171130,ENSG00000204371,ENSG00000185340,ENSG00000117410,ENSG00000102882,ENSG00000113742,ENSG00000177169,ENSG00000196235,ENSG00000032742,ENSG00000126247,ENSG00000014216,ENSG00000109083,ENSG00000085733,ENSG00000160803,ENSG00000165699,ENSG00000103148,ENSG00000100151,ENSG00000168397…
GO:0051493	regulation of cytoskeleton organization	biological_process	0.00058469	0.059364	44	1033	496	19500	ENSG00000166851,ENSG00000082898,ENSG00000071127,ENSG00000185324,ENSG00000172757,ENSG00000102882,ENSG00000137497,ENSG00000071051,ENSG00000163945,ENSG00000085733,ENSG00000188277,ENSG00000131504,ENSG00000088325,ENSG00000141522,ENSG00000175866,ENSG00000108518,ENSG00000196405,ENSG00000099849,ENSG00000174775,ENSG00000100151,ENSG00000165699,ENSG00000100092,ENSG00000197879,ENSG00000166780,ENSG00000128283…
GO:0001784	phosphotyrosine binding	molecular_function	0.00058993	0.059364	8	1033	37	19500	ENSG00000141968,ENSG00000071051,ENSG00000087266,ENSG00000110786,ENSG00000160691,ENSG00000102882,ENSG00000107338,ENSG00000105647
GO:0031669	cellular response to nutrient levels	biological_process	0.0005902	0.059364	39	1033	424	19500	ENSG00000168397,ENSG00000068903,ENSG00000166986,ENSG00000160948,ENSG00000167671,ENSG00000188186,ENSG00000070770,ENSG00000167965,ENSG00000148356,ENSG00000165861,ENSG00000072310,ENSG00000090339,ENSG00000039523,ENSG00000100300,ENSG00000134294,ENSG00000179364,ENSG00000160360,ENSG00000110931,ENSG00000171100,ENSG00000125952,ENSG00000143882,ENSG00000158773,ENSG00000204371,ENSG00000185340,ENSG00000171130…
GO:0015630	microtubule cytoskeleton	cellular_component	0.00059032	0.059364	86	1033	1142	19500	ENSG00000167461,ENSG00000258947,ENSG00000163346,ENSG00000109083,ENSG00000099814,ENSG00000085733,ENSG00000131504,ENSG00000088325,ENSG00000032742,ENSG00000149499,ENSG00000089820,ENSG00000168071,ENSG00000166851,ENSG00000177731,ENSG00000079974,ENSG00000142186,ENSG00000102409,ENSG00000173327,ENSG00000185324,ENSG00000137171,ENSG00000167797,ENSG00000182199,ENSG00000131871,ENSG00000187446,ENSG00000042493…
GO:1903321	negative regulation of protein modification by small protein conjugation or removal	biological_process	0.00059182	0.059364	16	1033	120	19500	ENSG00000140464,ENSG00000173039,ENSG00000160948,ENSG00000110200,ENSG00000063244,ENSG00000167770,ENSG00000116670,ENSG00000071539,ENSG00000101266,ENSG00000154473,ENSG00000166851,ENSG00000100300,ENSG00000141480,ENSG00000070770,ENSG00000187446,ENSG00000181790
GO:0045309	protein phosphorylated amino acid binding	molecular_function	0.00059278	0.059364	9	1033	46	19500	ENSG00000110786,ENSG00000160691,ENSG00000141968,ENSG00000087266,ENSG00000071051,ENSG00000105647,ENSG00000102882,ENSG00000108953,ENSG00000107338
GO:0032561	guanyl ribonucleotide binding	molecular_function	0.00060281	0.060086	37	1033	396	19500	ENSG00000037042,ENSG00000079974,ENSG00000096384,ENSG00000132881,ENSG00000173540,ENSG00000148824,ENSG00000108883,ENSG00000185527,ENSG00000172432,ENSG00000185236,ENSG00000100228,ENSG00000088325,ENSG00000174775,ENSG00000258947,ENSG00000167461,ENSG00000196642,ENSG00000166592,ENSG00000106976,ENSG00000186642,ENSG00000079805,ENSG00000139832,ENSG00000004478,ENSG00000155366,ENSG00000114993,ENSG00000196230…
GO:0022411	cellular component disassembly	biological_process	0.00060737	0.060257	40	1033	439	19500	ENSG00000166851,ENSG00000167110,ENSG00000071127,ENSG00000137309,ENSG00000110931,ENSG00000172757,ENSG00000100813,ENSG00000087088,ENSG00000085733,ENSG00000162236,ENSG00000189060,ENSG00000160570,ENSG00000125445,ENSG00000168397,ENSG00000100092,ENSG00000142330,ENSG00000132507,ENSG00000139613,ENSG00000126214,ENSG00000168487,ENSG00000149792,ENSG00000166780,ENSG00000107862,ENSG00000123384,ENSG00000140564…
GO:0051179	localization	biological_process	0.000613	0.060533	384	1033	6337	19500	ENSG00000014164,ENSG00000242247,ENSG00000167895,ENSG00000167851,ENSG00000100139,ENSG00000149131,ENSG00000185825,ENSG00000113758,ENSG00000168003,ENSG00000174775,ENSG00000187486,ENSG00000052344,ENSG00000166592,ENSG00000100083,ENSG00000147533,ENSG00000198825,ENSG00000175866,ENSG00000168874,ENSG00000017260,ENSG00000172057,ENSG00000198915,ENSG00000139190,ENSG00000141933,ENSG00000162517,ENSG00000168397…
GO:0065008	regulation of biological quality	biological_process	0.00061957	0.060651	233	1033	3631	19500	ENSG00000157514,ENSG00000143740,ENSG00000160014,ENSG00000049541,ENSG00000125148,ENSG00000185236,ENSG00000181790,ENSG00000145740,ENSG00000149925,ENSG00000171121,ENSG00000135365,ENSG00000196498,ENSG00000162298,ENSG00000165804,ENSG00000068001,ENSG00000172232,ENSG00000125648,ENSG00000120903,ENSG00000084207,ENSG00000198945,ENSG00000174791,ENSG00000181045,ENSG00000135740,ENSG00000196743,ENSG00000198914…
GO:0031397	negative regulation of protein ubiquitination	biological_process	0.00061991	0.060651	15	1033	109	19500	ENSG00000166851,ENSG00000154473,ENSG00000187446,ENSG00000181790,ENSG00000101266,ENSG00000071539,ENSG00000070770,ENSG00000167770,ENSG00000116670,ENSG00000063244,ENSG00000110200,ENSG00000141480,ENSG00000160948,ENSG00000140464,ENSG00000100300
GO:0019001	guanyl nucleotide binding	molecular_function	0.00063187	0.061538	37	1033	397	19500	ENSG00000185236,ENSG00000100228,ENSG00000088325,ENSG00000148824,ENSG00000108883,ENSG00000185527,ENSG00000172432,ENSG00000196642,ENSG00000166592,ENSG00000174775,ENSG00000258947,ENSG00000167461,ENSG00000132881,ENSG00000173540,ENSG00000079974,ENSG00000037042,ENSG00000096384,ENSG00000132518,ENSG00000114353,ENSG00000197043,ENSG00000133612,ENSG00000178605,ENSG00000139890,ENSG00000126458,ENSG00000197562…
GO:0051495	positive regulation of cytoskeleton organization	biological_process	0.0006465	0.062676	24	1033	220	19500	ENSG00000071127,ENSG00000197879,ENSG00000149798,ENSG00000172757,ENSG00000128283,ENSG00000136717,ENSG00000068903,ENSG00000155366,ENSG00000137497,ENSG00000167965,ENSG00000071051,ENSG00000085733,ENSG00000015285,ENSG00000196924,ENSG00000188277,ENSG00000175866,ENSG00000120899,ENSG00000102879,ENSG00000108518,ENSG00000196405,ENSG00000100151,ENSG00000174775,ENSG00000165699,ENSG00000090339
GO:0030695	GTPase regulator activity	molecular_function	0.00065987	0.06368	31	1033	314	19500	ENSG00000099331,ENSG00000213654,ENSG00000149798,ENSG00000169727,ENSG00000128283,ENSG00000114993,ENSG00000242247,ENSG00000159788,ENSG00000089820,ENSG00000100092,ENSG00000174791,ENSG00000120318,ENSG00000160360,ENSG00000184060,ENSG00000130052,ENSG00000071205,ENSG00000100401,ENSG00000180448,ENSG00000103148,ENSG00000164050,ENSG00000133138,ENSG00000132694,ENSG00000105647,ENSG00000015285,ENSG00000108262…
GO:0031344	regulation of cell projection organization	biological_process	0.00067549	0.064893	52	1033	618	19500	ENSG00000141837,ENSG00000185324,ENSG00000114745,ENSG00000113758,ENSG00000172757,ENSG00000088899,ENSG00000165802,ENSG00000089820,ENSG00000085733,ENSG00000109083,ENSG00000184014,ENSG00000198825,ENSG00000175866,ENSG00000112655,ENSG00000141522,ENSG00000032742,ENSG00000071054,ENSG00000188277,ENSG00000130175,ENSG00000174775,ENSG00000108518,ENSG00000196405,ENSG00000133216,ENSG00000068971,ENSG00000158321…
GO:0019637	organophosphate metabolic process	biological_process	0.00070677	0.067457	86	1033	1149	19500	ENSG00000165282,ENSG00000174915,ENSG00000173540,ENSG00000138621,ENSG00000170906,ENSG00000171100,ENSG00000108474,ENSG00000077463,ENSG00000073060,ENSG00000069998,ENSG00000138031,ENSG00000004455,ENSG00000106348,ENSG00000006695,ENSG00000130717,ENSG00000165782,ENSG00000275074,ENSG00000076555,ENSG00000163382,ENSG00000149527,ENSG00000141506,ENSG00000129219,ENSG00000131446,ENSG00000120899,ENSG00000067225…
GO:0043029	T cell homeostasis	biological_process	0.00070854	0.067457	8	1033	38	19500	ENSG00000157514,ENSG00000105639,ENSG00000056586,ENSG00000166925,ENSG00000102879,ENSG00000137078,ENSG00000129465,ENSG00000087088
GO:0046822	regulation of nucleocytoplasmic transport	biological_process	0.00072437	0.068656	18	1033	146	19500	ENSG00000011243,ENSG00000146232,ENSG00000187446,ENSG00000102898,ENSG00000105647,ENSG00000157110,ENSG00000100401,ENSG00000138757,ENSG00000068001,ENSG00000173933,ENSG00000186642,ENSG00000096384,ENSG00000148737,ENSG00000082898,ENSG00000079999,ENSG00000014164,ENSG00000176973,ENSG00000108953
GO:2001235	positive regulation of apoptotic signaling pathway	biological_process	0.00073917	0.069748	20	1033	171	19500	ENSG00000135916,ENSG00000170315,ENSG00000071051,ENSG00000101109,ENSG00000136305,ENSG00000011422,ENSG00000143546,ENSG00000184381,ENSG00000160570,ENSG00000105327,ENSG00000125826,ENSG00000137275,ENSG00000185825,ENSG00000122641,ENSG00000068001,ENSG00000108953,ENSG00000087088,ENSG00000171552,ENSG00000129465,ENSG00000140464
GO:0032434	regulation of proteasomal ubiquitin-dependent protein catabolic process	biological_process	0.00074442	0.069933	20	1033	171	19500	ENSG00000087586,ENSG00000160803,ENSG00000213923,ENSG00000158941,ENSG00000116670,ENSG00000274897,ENSG00000071539,ENSG00000185825,ENSG00000171100,ENSG00000096384,ENSG00000072609,ENSG00000154473,ENSG00000123159,ENSG00000166851,ENSG00000068903,ENSG00000135924,ENSG00000079999,ENSG00000110200,ENSG00000166963,ENSG00000141551
GO:0043161	proteasome-mediated ubiquitin-dependent protein catabolic process	biological_process	0.0007617	0.071241	37	1033	401	19500	ENSG00000110200,ENSG00000168159,ENSG00000274897,ENSG00000162298,ENSG00000158062,ENSG00000185825,ENSG00000154473,ENSG00000171100,ENSG00000096384,ENSG00000166851,ENSG00000213923,ENSG00000135506,ENSG00000141480,ENSG00000167977,ENSG00000092871,ENSG00000089053,ENSG00000160803,ENSG00000114626,ENSG00000068903,ENSG00000135924,ENSG00000079999,ENSG00000140464,ENSG00000170633,ENSG00000166963,ENSG00000141551…
GO:0006851	mitochondrial calcium ion transport	biological_process	0.00077704	0.072356	6	1033	22	19500	ENSG00000183172,ENSG00000197912,ENSG00000125648,ENSG00000156026,ENSG00000107745,ENSG00000215021
GO:0051234	establishment of localization	biological_process	0.00080493	0.074627	314	1033	5089	19500	ENSG00000126214,ENSG00000128322,ENSG00000100401,ENSG00000132507,ENSG00000100092,ENSG00000163884,ENSG00000079999,ENSG00000129219,ENSG00000138326,ENSG00000141252,ENSG00000143546,ENSG00000100991,ENSG00000137266,ENSG00000165915,ENSG00000086730,ENSG00000160685,ENSG00000039523,ENSG00000087274,ENSG00000157110,ENSG00000102879,ENSG00000126267,ENSG00000068400,ENSG00000138757,ENSG00000180448,ENSG00000157349…
GO:0044427	chromosomal part	cellular_component	0.00081397	0.075137	68	1033	869	19500	ENSG00000116670,ENSG00000185499,ENSG00000100401,ENSG00000166508,ENSG00000068903,ENSG00000142945,ENSG00000203814,ENSG00000087586,ENSG00000181218,ENSG00000125347,ENSG00000158941,ENSG00000166851,ENSG00000137309,ENSG00000127528,ENSG00000101266,ENSG00000106245,ENSG00000100242,ENSG00000165802,ENSG00000077514,ENSG00000132780,ENSG00000204371,ENSG00000187778,ENSG00000102901,ENSG00000173039,ENSG00000077463…
GO:0034613	cellular protein localization	biological_process	0.00083729	0.076656	112	1033	1579	19500	ENSG00000130204,ENSG00000163812,ENSG00000100321,ENSG00000187535,ENSG00000163930,ENSG00000090581,ENSG00000168397,ENSG00000106462,ENSG00000186642,ENSG00000140464,ENSG00000171552,ENSG00000107862,ENSG00000141551,ENSG00000108953,ENSG00000166963,ENSG00000146232,ENSG00000133612,ENSG00000196924,ENSG00000215021,ENSG00000070770,ENSG00000168890,ENSG00000170315,ENSG00000110651,ENSG00000139626,ENSG00000102898…
GO:0001775	cell activation	biological_process	0.00083765	0.076656	100	1033	1382	19500	ENSG00000141480,ENSG00000122986,ENSG00000137078,ENSG00000165699,ENSG00000064601,ENSG00000149091,ENSG00000071051,ENSG00000106244,ENSG00000180549,ENSG00000014216,ENSG00000104853,ENSG00000028277,ENSG00000106348,ENSG00000131504,ENSG00000157873,ENSG00000102882,ENSG00000005844,ENSG00000240505,ENSG00000166526,ENSG00000127533,ENSG00000087088,ENSG00000168071,ENSG00000136802,ENSG00000129465,ENSG00000172936…
GO:0030833	regulation of actin filament polymerization	biological_process	0.00084824	0.077292	18	1033	148	19500	ENSG00000136717,ENSG00000128283,ENSG00000149798,ENSG00000197879,ENSG00000100151,ENSG00000196405,ENSG00000108518,ENSG00000102879,ENSG00000090339,ENSG00000087274,ENSG00000015285,ENSG00000085733,ENSG00000071051,ENSG00000042493,ENSG00000167965,ENSG00000175866,ENSG00000120899,ENSG00000188277
GO:0030055	cell-substrate junction	cellular_component	0.00087309	0.078733	37	1033	404	19500	ENSG00000172354,ENSG00000149260,ENSG00000172757,ENSG00000102882,ENSG00000154330,ENSG00000177731,ENSG00000079819,ENSG00000137309,ENSG00000108518,ENSG00000196405,ENSG00000214063,ENSG00000112655,ENSG00000014216,ENSG00000181790,ENSG00000085733,ENSG00000123384,ENSG00000149428,ENSG00000128283,ENSG00000108953,ENSG00000051523,ENSG00000065618,ENSG00000079805,ENSG00000130052,ENSG00000072163,ENSG00000087274…
GO:0031988	membrane-bounded vesicle	cellular_component	0.0008771	0.078733	203	1033	3129	19500	ENSG00000162236,ENSG00000113648,ENSG00000155660,ENSG00000014216,ENSG00000149927,ENSG00000011009,ENSG00000136143,ENSG00000167461,ENSG00000141480,ENSG00000258947,ENSG00000108518,ENSG00000142669,ENSG00000142186,ENSG00000182871,ENSG00000149260,ENSG00000102805,ENSG00000103876,ENSG00000131446,ENSG00000101294,ENSG00000141258,ENSG00000108107,ENSG00000187446,ENSG00000137496,ENSG00000170909,ENSG00000106992…
GO:0070647	protein modification by small protein conjugation or removal	biological_process	0.00087786	0.078733	84	1033	1125	19500	ENSG00000185627,ENSG00000104343,ENSG00000072609,ENSG00000168883,ENSG00000116670,ENSG00000043143,ENSG00000108578,ENSG00000160948,ENSG00000132952,ENSG00000170633,ENSG00000169727,ENSG00000156587,ENSG00000176170,ENSG00000079999,ENSG00000170185,ENSG00000148356,ENSG00000100991,ENSG00000132716,ENSG00000187446,ENSG00000132879,ENSG00000178498,ENSG00000120899,ENSG00000164068,ENSG00000131871,ENSG00000197562…
GO:0051235	maintenance of location	biological_process	0.00087889	0.078733	29	1033	292	19500	ENSG00000051523,ENSG00000138757,ENSG00000113758,ENSG00000125648,ENSG00000100242,ENSG00000196743,ENSG00000127533,ENSG00000118961,ENSG00000079999,ENSG00000140464,ENSG00000073060,ENSG00000171298,ENSG00000087088,ENSG00000145740,ENSG00000154118,ENSG00000146232,ENSG00000160014,ENSG00000196924,ENSG00000143546,ENSG00000131504,ENSG00000085872,ENSG00000176438,ENSG00000120899,ENSG00000105327,ENSG00000076555…
GO:0048585	negative regulation of response to stimulus	biological_process	0.00088906	0.079082	109	1033	1532	19500	ENSG00000106976,ENSG00000106462,ENSG00000168101,ENSG00000120318,ENSG00000078699,ENSG00000065361,ENSG00000079805,ENSG00000173821,ENSG00000149428,ENSG00000091732,ENSG00000061273,ENSG00000204673,ENSG00000151208,ENSG00000181830,ENSG00000171552,ENSG00000128917,ENSG00000170315,ENSG00000179526,ENSG00000011422,ENSG00000114353,ENSG00000168918,ENSG00000215021,ENSG00000138835,ENSG00000070770,ENSG00000187045…
GO:0097191	extrinsic apoptotic signaling pathway	biological_process	0.00089024	0.079082	24	1033	225	19500	ENSG00000171552,ENSG00000173039,ENSG00000167895,ENSG00000140464,ENSG00000091732,ENSG00000087088,ENSG00000170633,ENSG00000068001,ENSG00000158796,ENSG00000122641,ENSG00000065361,ENSG00000084207,ENSG00000163349,ENSG00000125826,ENSG00000137275,ENSG00000148737,ENSG00000090339,ENSG00000164362,ENSG00000092871,ENSG00000160570,ENSG00000160789,ENSG00000101109,ENSG00000085733,ENSG00000135916
GO:0031396	regulation of protein ubiquitination	biological_process	0.00092988	0.082259	25	1033	239	19500	ENSG00000160948,ENSG00000169689,ENSG00000110200,ENSG00000176170,ENSG00000140464,ENSG00000135924,ENSG00000167110,ENSG00000162517,ENSG00000101266,ENSG00000096384,ENSG00000154473,ENSG00000072609,ENSG00000166851,ENSG00000063244,ENSG00000116670,ENSG00000167770,ENSG00000071539,ENSG00000114745,ENSG00000141480,ENSG00000100300,ENSG00000170315,ENSG00000187446,ENSG00000181790,ENSG00000120899,ENSG00000070770
GO:0035567	non-canonical Wnt signaling pathway	biological_process	0.00095537	0.084163	14	1033	102	19500	ENSG00000141551,ENSG00000173821,ENSG00000135299,ENSG00000108518,ENSG00000141480,ENSG00000161203,ENSG00000078369,ENSG00000213923,ENSG00000148737,ENSG00000149782,ENSG00000042753,ENSG00000120057,ENSG00000112655,ENSG00000131196
GO:0005773	vacuole	cellular_component	0.00097449	0.085493	61	1033	766	19500	ENSG00000169682,ENSG00000168890,ENSG00000135916,ENSG00000150967,ENSG00000197043,ENSG00000213658,ENSG00000101294,ENSG00000105327,ENSG00000166900,ENSG00000244038,ENSG00000165861,ENSG00000107331,ENSG00000086730,ENSG00000122679,ENSG00000042753,ENSG00000135124,ENSG00000136710,ENSG00000100321,ENSG00000105700,ENSG00000167671,ENSG00000188186,ENSG00000198715,ENSG00000005206,ENSG00000122359,ENSG00000196230…
GO:0051289	protein homotetramerization	biological_process	0.00098073	0.085687	12	1033	80	19500	ENSG00000149925,ENSG00000167110,ENSG00000101294,ENSG00000163382,ENSG00000160741,ENSG00000067225,ENSG00000211445,ENSG00000124713,ENSG00000196405,ENSG00000076555,ENSG00000072506,ENSG00000182199
GO:0051020	GTPase binding	molecular_function	0.00099518	0.086593	33	1033	350	19500	ENSG00000197879,ENSG00000100401,ENSG00000128283,ENSG00000204392,ENSG00000149798,ENSG00000114993,ENSG00000130733,ENSG00000015285,ENSG00000102898,ENSG00000141258,ENSG00000196924,ENSG00000054356,ENSG00000137843,ENSG00000082898,ENSG00000100139,ENSG00000174791,ENSG00000125447,ENSG00000173327,ENSG00000099331,ENSG00000078369,ENSG00000089820,ENSG00000172354,ENSG00000184014,ENSG00000109083,ENSG00000177169…
GO:0005794	Golgi apparatus	cellular_component	0.0010627	0.09209	107	1033	1507	19500	ENSG00000162236,ENSG00000100228,ENSG00000197586,ENSG00000174871,ENSG00000141627,ENSG00000121578,ENSG00000085733,ENSG00000184014,ENSG00000109083,ENSG00000180549,ENSG00000100023,ENSG00000011009,ENSG00000080603,ENSG00000100151,ENSG00000189060,ENSG00000167461,ENSG00000142186,ENSG00000165905,ENSG00000125447,ENSG00000167889,ENSG00000123064,ENSG00000168071,ENSG00000102805,ENSG00000089820,ENSG00000102882…
GO:0005525	GTP binding	molecular_function	0.0010758	0.092845	35	1033	380	19500	ENSG00000106976,ENSG00000079805,ENSG00000139832,ENSG00000004478,ENSG00000179583,ENSG00000184640,ENSG00000114993,ENSG00000155366,ENSG00000196230,ENSG00000133612,ENSG00000178605,ENSG00000139890,ENSG00000132518,ENSG00000114353,ENSG00000197043,ENSG00000164402,ENSG00000106608,ENSG00000197562,ENSG00000126458,ENSG00000096384,ENSG00000079974,ENSG00000037042,ENSG00000173540,ENSG00000132881,ENSG00000108883…
GO:1902578	single-organism localization	biological_process	0.0010828	0.092861	292	1033	4716	19500	ENSG00000176087,ENSG00000157593,ENSG00000145740,ENSG00000172432,ENSG00000069424,ENSG00000157514,ENSG00000185236,ENSG00000169180,ENSG00000197119,ENSG00000171121,ENSG00000162383,ENSG00000143882,ENSG00000102100,ENSG00000084207,ENSG00000166394,ENSG00000054116,ENSG00000181045,ENSG00000162298,ENSG00000011422,ENSG00000102898,ENSG00000170315,ENSG00000128284,ENSG00000142405,ENSG00000215021,ENSG00000205323…
GO:2000379	positive regulation of reactive oxygen species metabolic process	biological_process	0.001088	0.092861	13	1033	92	19500	ENSG00000051523,ENSG00000114353,ENSG00000079805,ENSG00000120899,ENSG00000084207,ENSG00000181790,ENSG00000096384,ENSG00000137275,ENSG00000127528,ENSG00000135124,ENSG00000129465,ENSG00000100300,ENSG00000090339
GO:0070727	cellular macromolecule localization	biological_process	0.0010912	0.092861	112	1033	1591	19500	ENSG00000113648,ENSG00000131504,ENSG00000160789,ENSG00000162236,ENSG00000109083,ENSG00000064601,ENSG00000085733,ENSG00000213923,ENSG00000135506,ENSG00000164362,ENSG00000100023,ENSG00000133216,ENSG00000167461,ENSG00000100151,ENSG00000138757,ENSG00000125447,ENSG00000166851,ENSG00000141837,ENSG00000102901,ENSG00000095321,ENSG00000132329,ENSG00000161203,ENSG00000087088,ENSG00000100242,ENSG00000005844…
GO:0051716	cellular response to stimulus	biological_process	0.0010948	0.092861	439	1033	7395	19500	ENSG00000137496,ENSG00000187446,ENSG00000178719,ENSG00000182749,ENSG00000169682,ENSG00000101294,ENSG00000146005,ENSG00000166900,ENSG00000181218,ENSG00000164050,ENSG00000107338,ENSG00000013725,ENSG00000165816,ENSG00000125347,ENSG00000042753,ENSG00000104343,ENSG00000135124,ENSG00000129657,ENSG00000239282,ENSG00000136279,ENSG00000105701,ENSG00000173020,ENSG00000072163,ENSG00000172667,ENSG00000139832…
GO:0023026	MHC class II protein complex binding	molecular_function	0.0011019	0.092861	5	1033	16	19500	ENSG00000122359,ENSG00000067225,ENSG00000108953,ENSG00000110651,ENSG00000096384
GO:0033209	tumor necrosis factor-mediated signaling pathway	biological_process	0.0011059	0.092861	16	1033	127	19500	ENSG00000092871,ENSG00000186827,ENSG00000179526,ENSG00000120899,ENSG00000157873,ENSG00000240505,ENSG00000176170,ENSG00000149600,ENSG00000173039,ENSG00000005206,ENSG00000125826,ENSG00000137275,ENSG00000084207,ENSG00000163349,ENSG00000120949,ENSG00000054967
GO:0051353	positive regulation of oxidoreductase activity	biological_process	0.0011066	0.092861	9	1033	50	19500	ENSG00000127948,ENSG00000073060,ENSG00000129465,ENSG00000164362,ENSG00000160014,ENSG00000051523,ENSG00000120899,ENSG00000127129,ENSG00000114353
GO:0005925	focal adhesion	cellular_component	0.0011606	0.097007	36	1033	396	19500	ENSG00000177731,ENSG00000079819,ENSG00000137309,ENSG00000154330,ENSG00000102882,ENSG00000172757,ENSG00000172354,ENSG00000149260,ENSG00000014216,ENSG00000181790,ENSG00000085733,ENSG00000214063,ENSG00000112655,ENSG00000196405,ENSG00000108518,ENSG00000051523,ENSG00000079805,ENSG00000072163,ENSG00000130052,ENSG00000128283,ENSG00000149428,ENSG00000108953,ENSG00000123384,ENSG00000108262,ENSG00000167460…
GO:0044265	cellular macromolecule catabolic process	biological_process	0.0011745	0.097786	78	1033	1040	19500	ENSG00000185453,ENSG00000092871,ENSG00000110801,ENSG00000167977,ENSG00000189060,ENSG00000141480,ENSG00000135506,ENSG00000213923,ENSG00000182670,ENSG00000064601,ENSG00000089053,ENSG00000110200,ENSG00000135108,ENSG00000183655,ENSG00000087088,ENSG00000161203,ENSG00000127452,ENSG00000137275,ENSG00000101266,ENSG00000166851,ENSG00000171100,ENSG00000158062,ENSG00000274897,ENSG00000162385,ENSG00000141698…
GO:0030001	metal ion transport	biological_process	0.0011872	0.09829	67	1033	866	19500	ENSG00000125648,ENSG00000168003,ENSG00000185482,ENSG00000143882,ENSG00000135740,ENSG00000185236,ENSG00000160014,ENSG00000069424,ENSG00000017260,ENSG00000145740,ENSG00000166592,ENSG00000052344,ENSG00000171121,ENSG00000167614,ENSG00000187486,ENSG00000079805,ENSG00000051523,ENSG00000186642,ENSG00000140464,ENSG00000136717,ENSG00000004478,ENSG00000108953,ENSG00000197043,ENSG00000114353,ENSG00000085872…
GO:0042594	response to starvation	biological_process	0.0011898	0.09829	37	1033	411	19500	ENSG00000068903,ENSG00000166986,ENSG00000160948,ENSG00000167671,ENSG00000188186,ENSG00000168397,ENSG00000165861,ENSG00000072310,ENSG00000039523,ENSG00000100300,ENSG00000134294,ENSG00000179364,ENSG00000070770,ENSG00000167965,ENSG00000148356,ENSG00000185340,ENSG00000204371,ENSG00000171130,ENSG00000117410,ENSG00000102882,ENSG00000113742,ENSG00000160360,ENSG00000110931,ENSG00000171100,ENSG00000125952…
GO:0044765	single-organism transport	biological_process	0.0012519	0.10302	280	1033	4512	19500	ENSG00000185825,ENSG00000168003,ENSG00000100139,ENSG00000149131,ENSG00000242247,ENSG00000167851,ENSG00000167895,ENSG00000014164,ENSG00000175866,ENSG00000198825,ENSG00000172057,ENSG00000017260,ENSG00000166592,ENSG00000052344,ENSG00000147533,ENSG00000174775,ENSG00000187486,ENSG00000163812,ENSG00000079805,ENSG00000162517,ENSG00000168397,ENSG00000139190,ENSG00000197043,ENSG00000196924,ENSG00000070770…
GO:0036444	calcium ion transmembrane import into mitochondrion	biological_process	0.0012653	0.10372	4	1033	10	19500	ENSG00000183172,ENSG00000156026,ENSG00000107745,ENSG00000125648
GO:2001238	positive regulation of extrinsic apoptotic signaling pathway	biological_process	0.0012866	0.10506	9	1033	51	19500	ENSG00000122641,ENSG00000068001,ENSG00000125826,ENSG00000137275,ENSG00000135916,ENSG00000101109,ENSG00000087088,ENSG00000140464,ENSG00000160570
GO:0016192	vesicle-mediated transport	biological_process	0.0013148	0.10695	135	1033	1985	19500	ENSG00000099290,ENSG00000142186,ENSG00000135441,ENSG00000102805,ENSG00000162236,ENSG00000014216,ENSG00000085733,ENSG00000149927,ENSG00000141480,ENSG00000167461,ENSG00000173020,ENSG00000136279,ENSG00000139832,ENSG00000197879,ENSG00000185215,ENSG00000143621,ENSG00000122679,ENSG00000042753,ENSG00000185627,ENSG00000122359,ENSG00000123384,ENSG00000160948,ENSG00000141258,ENSG00000142945,ENSG00000187446…
GO:0016301	kinase activity	molecular_function	0.00132	0.10695	69	1033	901	19500	ENSG00000117266,ENSG00000102882,ENSG00000114738,ENSG00000073331,ENSG00000129465,ENSG00000101266,ENSG00000137275,ENSG00000142186,ENSG00000172939,ENSG00000166851,ENSG00000185324,ENSG00000173327,ENSG00000133216,ENSG00000130717,ENSG00000213923,ENSG00000059758,ENSG00000149091,ENSG00000177169,ENSG00000004455,ENSG00000112655,ENSG00000266173,ENSG00000176170,ENSG00000179583,ENSG00000141506,ENSG00000198909…
GO:0005924	cell-substrate adherens junction	cellular_component	0.0013249	0.10695	36	1033	399	19500	ENSG00000177731,ENSG00000079819,ENSG00000137309,ENSG00000154330,ENSG00000172757,ENSG00000102882,ENSG00000172354,ENSG00000149260,ENSG00000014216,ENSG00000181790,ENSG00000085733,ENSG00000214063,ENSG00000112655,ENSG00000108518,ENSG00000196405,ENSG00000051523,ENSG00000079805,ENSG00000072163,ENSG00000130052,ENSG00000149428,ENSG00000128283,ENSG00000108953,ENSG00000123384,ENSG00000108262,ENSG00000011422…
GO:0005856	cytoskeleton	cellular_component	0.0013319	0.10711	141	1033	2087	19500	ENSG00000085733,ENSG00000109083,ENSG00000160789,ENSG00000088325,ENSG00000163995,ENSG00000258947,ENSG00000108518,ENSG00000167461,ENSG00000165699,ENSG00000142186,ENSG00000136732,ENSG00000166851,ENSG00000154330,ENSG00000149499,ENSG00000099331,ENSG00000165802,ENSG00000168071,ENSG00000185340,ENSG00000142945,ENSG00000187446,ENSG00000120899,ENSG00000137171,ENSG00000167797,ENSG00000197879,ENSG00000136279…
GO:0048518	positive regulation of biological process	biological_process	0.0013537	0.10845	363	1033	6017	19500	ENSG00000066136,ENSG00000181790,ENSG00000126247,ENSG00000108840,ENSG00000049541,ENSG00000196235,ENSG00000160014,ENSG00000102908,ENSG00000143740,ENSG00000103148,ENSG00000196498,ENSG00000064313,ENSG00000159202,ENSG00000167110,ENSG00000165821,ENSG00000213999,ENSG00000125952,ENSG00000185482,ENSG00000160360,ENSG00000165804,ENSG00000172232,ENSG00000114745,ENSG00000068001,ENSG00000169689,ENSG00000168159…
GO:1990246	uniplex complex	cellular_component	0.0013592	0.10845	3	1033	5	19500	ENSG00000183172,ENSG00000107745,ENSG00000156026
GO:0070235	regulation of activation-induced cell death of T cells	biological_process	0.0013638	0.10845	3	1033	5	19500	ENSG00000129465,ENSG00000157514,ENSG00000166925
GO:1901137	carbohydrate derivative biosynthetic process	biological_process	0.0013769	0.10908	57	1033	715	19500	ENSG00000090581,ENSG00000185499,ENSG00000172992,ENSG00000102125,ENSG00000160408,ENSG00000068903,ENSG00000105639,ENSG00000047230,ENSG00000067225,ENSG00000131446,ENSG00000132518,ENSG00000114353,ENSG00000007541,ENSG00000187446,ENSG00000119227,ENSG00000135916,ENSG00000241837,ENSG00000158089,ENSG00000143774,ENSG00000117448,ENSG00000124357,ENSG00000244038,ENSG00000106992,ENSG00000162298,ENSG00000173540…
GO:0042802	identical protein binding	molecular_function	0.0013961	0.11019	116	1033	1669	19500	ENSG00000087274,ENSG00000182199,ENSG00000160685,ENSG00000165915,ENSG00000011485,ENSG00000102879,ENSG00000165816,ENSG00000013725,ENSG00000157110,ENSG00000067225,ENSG00000059573,ENSG00000108798,ENSG00000101294,ENSG00000129103,ENSG00000005206,ENSG00000079999,ENSG00000172482,ENSG00000171467,ENSG00000108578,ENSG00000124713,ENSG00000105701,ENSG00000064419,ENSG00000163382,ENSG00000168487,ENSG00000123159…
GO:0005694	chromosome	cellular_component	0.0014161	0.11135	75	1033	999	19500	ENSG00000166508,ENSG00000068903,ENSG00000116670,ENSG00000100401,ENSG00000185499,ENSG00000173715,ENSG00000181218,ENSG00000125347,ENSG00000158941,ENSG00000203814,ENSG00000142945,ENSG00000087586,ENSG00000122965,ENSG00000100242,ENSG00000077514,ENSG00000165802,ENSG00000204371,ENSG00000132780,ENSG00000102901,ENSG00000159788,ENSG00000187778,ENSG00000077463,ENSG00000173039,ENSG00000127528,ENSG00000137309…
GO:1901505	carbohydrate derivative transporter activity	molecular_function	0.0014238	0.11154	8	1033	42	19500	ENSG00000176087,ENSG00000102100,ENSG00000157593,ENSG00000198246,ENSG00000125648,ENSG00000169241,ENSG00000181830,ENSG00000112759
GO:0071704	organic substance metabolic process	biological_process	0.0014371	0.11217	646	1033	11321	19500	ENSG00000176170,ENSG00000079999,ENSG00000108578,ENSG00000124713,ENSG00000129219,ENSG00000168522,ENSG00000138326,ENSG00000059573,ENSG00000143546,ENSG00000125458,ENSG00000156599,ENSG00000160685,ENSG00000197562,ENSG00000087274,ENSG00000157110,ENSG00000141837,ENSG00000157349,ENSG00000137309,ENSG00000166278,ENSG00000132329,ENSG00000142252,ENSG00000117266,ENSG00000034053,ENSG00000164535,ENSG00000110200…
GO:0002260	lymphocyte homeostasis	biological_process	0.0014475	0.11226	10	1033	62	19500	ENSG00000087088,ENSG00000137078,ENSG00000129465,ENSG00000102879,ENSG00000240505,ENSG00000166925,ENSG00000056586,ENSG00000213658,ENSG00000105639,ENSG00000157514
GO:0000139	Golgi membrane	cellular_component	0.0014488	0.11226	58	1033	732	19500	ENSG00000141551,ENSG00000140564,ENSG00000169241,ENSG00000005206,ENSG00000181830,ENSG00000107862,ENSG00000160408,ENSG00000162517,ENSG00000079805,ENSG00000163812,ENSG00000100478,ENSG00000090581,ENSG00000136279,ENSG00000103056,ENSG00000165915,ENSG00000072310,ENSG00000005486,ENSG00000158089,ENSG00000136699,ENSG00000122390,ENSG00000187446,ENSG00000143578,ENSG00000101294,ENSG00000131446,ENSG00000141252…
GO:0034622	cellular macromolecular complex assembly	biological_process	0.0014775	0.11407	80	1033	1081	19500	ENSG00000167468,ENSG00000144028,ENSG00000129680,ENSG00000064313,ENSG00000167792,ENSG00000175866,ENSG00000198825,ENSG00000143740,ENSG00000145214,ENSG00000204220,ENSG00000137497,ENSG00000105341,ENSG00000205531,ENSG00000099991,ENSG00000185130,ENSG00000169689,ENSG00000169371,ENSG00000185024,ENSG00000037042,ENSG00000167110,ENSG00000213619,ENSG00000096384,ENSG00000130414,ENSG00000090339,ENSG00000126216…
GO:0042063	gliogenesis	biological_process	0.0015165	0.11631	26	1033	261	19500	ENSG00000143546,ENSG00000157227,ENSG00000120899,ENSG00000166145,ENSG00000111361,ENSG00000162576,ENSG00000164362,ENSG00000100300,ENSG00000054654,ENSG00000100151,ENSG00000172232,ENSG00000065361,ENSG00000084207,ENSG00000106462,ENSG00000137270,ENSG00000071127,ENSG00000135124,ENSG00000175505,ENSG00000173039,ENSG00000068903,ENSG00000163884,ENSG00000123384,ENSG00000166780,ENSG00000102882,ENSG00000100242…
GO:1901799	negative regulation of proteasomal protein catabolic process	biological_process	0.0015175	0.11631	11	1033	73	19500	ENSG00000110200,ENSG00000166963,ENSG00000158941,ENSG00000096384,ENSG00000171100,ENSG00000154473,ENSG00000166851,ENSG00000123159,ENSG00000274897,ENSG00000116670,ENSG00000071539
GO:0045321	leukocyte activation	biological_process	0.0015709	0.11997	89	1033	1229	19500	ENSG00000141968,ENSG00000096384,ENSG00000084207,ENSG00000172232,ENSG00000068001,ENSG00000056586,ENSG00000196743,ENSG00000133246,ENSG00000164687,ENSG00000167851,ENSG00000163154,ENSG00000149925,ENSG00000108840,ENSG00000069424,ENSG00000172057,ENSG00000101425,ENSG00000135100,ENSG00000124570,ENSG00000167613,ENSG00000147533,ENSG00000122641,ENSG00000100321,ENSG00000051523,ENSG00000204435,ENSG00000071564…
GO:0031267	small GTPase binding	molecular_function	0.001635	0.12442	30	1033	318	19500	ENSG00000099331,ENSG00000204392,ENSG00000149798,ENSG00000128283,ENSG00000114993,ENSG00000089820,ENSG00000130733,ENSG00000082898,ENSG00000100139,ENSG00000125447,ENSG00000174791,ENSG00000197879,ENSG00000100401,ENSG00000173327,ENSG00000137843,ENSG00000133138,ENSG00000167461,ENSG00000169180,ENSG00000108518,ENSG00000100083,ENSG00000015285,ENSG00000102898,ENSG00000109083,ENSG00000184014,ENSG00000141522…
GO:0048523	negative regulation of cellular process	biological_process	0.0016518	0.12525	287	1033	4658	19500	ENSG00000108518,ENSG00000068971,ENSG00000165699,ENSG00000135506,ENSG00000164362,ENSG00000085733,ENSG00000160789,ENSG00000130175,ENSG00000113648,ENSG00000182872,ENSG00000127533,ENSG00000077463,ENSG00000185340,ENSG00000166851,ENSG00000171100,ENSG00000182871,ENSG00000197114,ENSG00000127528,ENSG00000063244,ENSG00000106992,ENSG00000007237,ENSG00000075413,ENSG00000188779,ENSG00000116580,ENSG00000167965…
GO:1903827	regulation of cellular protein localization	biological_process	0.001683	0.12681	41	1033	478	19500	ENSG00000161203,ENSG00000137497,ENSG00000082898,ENSG00000148737,ENSG00000096384,ENSG00000166851,ENSG00000185482,ENSG00000185825,ENSG00000138757,ENSG00000068001,ENSG00000174775,ENSG00000133216,ENSG00000187486,ENSG00000135506,ENSG00000213923,ENSG00000185236,ENSG00000160789,ENSG00000069424,ENSG00000166963,ENSG00000108953,ENSG00000176973,ENSG00000123384,ENSG00000107862,ENSG00000171552,ENSG00000068903…
GO:0043069	negative regulation of programmed cell death	biological_process	0.0016843	0.12681	68	1033	894	19500	ENSG00000141837,ENSG00000172936,ENSG00000137275,ENSG00000101266,ENSG00000166851,ENSG00000172757,ENSG00000196588,ENSG00000087088,ENSG00000173039,ENSG00000085733,ENSG00000160691,ENSG00000160789,ENSG00000092871,ENSG00000141480,ENSG00000100721,ENSG00000158887,ENSG00000164362,ENSG00000072163,ENSG00000185499,ENSG00000105701,ENSG00000169242,ENSG00000170633,ENSG00000123384,ENSG00000176170,ENSG00000130427…
GO:0098805	whole membrane	cellular_component	0.0017293	0.12974	153	1033	2306	19500	ENSG00000136710,ENSG00000116815,ENSG00000132507,ENSG00000185499,ENSG00000105700,ENSG00000188186,ENSG00000167671,ENSG00000005206,ENSG00000198715,ENSG00000171298,ENSG00000141252,ENSG00000213658,ENSG00000102879,ENSG00000197562,ENSG00000086730,ENSG00000113763,ENSG00000125447,ENSG00000137275,ENSG00000172936,ENSG00000180448,ENSG00000205090,ENSG00000068400,ENSG00000172757,ENSG00000102882,ENSG00000005844…
GO:0001772	immunological synapse	cellular_component	0.0017459	0.13052	7	1033	34	19500	ENSG00000110651,ENSG00000013725,ENSG00000102879,ENSG00000104894,ENSG00000090339,ENSG00000141522,ENSG00000213658
GO:0042592	homeostatic process	biological_process	0.0017581	0.13071	117	1033	1697	19500	ENSG00000050426,ENSG00000166963,ENSG00000108953,ENSG00000140464,ENSG00000135924,ENSG00000106462,ENSG00000051523,ENSG00000160741,ENSG00000163930,ENSG00000122641,ENSG00000105327,ENSG00000257949,ENSG00000005007,ENSG00000054356,ENSG00000105647,ENSG00000107331,ENSG00000197299,ENSG00000090339,ENSG00000083454,ENSG00000100300,ENSG00000152457,ENSG00000154118,ENSG00000187045,ENSG00000184381,ENSG00000197043…
GO:0031647	regulation of protein stability	biological_process	0.0017608	0.13071	25	1033	250	19500	ENSG00000169242,ENSG00000048028,ENSG00000172534,ENSG00000077463,ENSG00000072609,ENSG00000096384,ENSG00000123159,ENSG00000166851,ENSG00000162298,ENSG00000274897,ENSG00000108518,ENSG00000072310,ENSG00000164362,ENSG00000117385,ENSG00000147533,ENSG00000165699,ENSG00000158941,ENSG00000110651,ENSG00000064601,ENSG00000187446,ENSG00000101109,ENSG00000011451,ENSG00000087586,ENSG00000196924,ENSG00000215021
GO:0006914	autophagy	biological_process	0.0017854	0.13208	39	1033	450	19500	ENSG00000168701,ENSG00000140474,ENSG00000102882,ENSG00000117410,ENSG00000204371,ENSG00000171130,ENSG00000167110,ENSG00000171100,ENSG00000143882,ENSG00000160360,ENSG00000110931,ENSG00000103148,ENSG00000167461,ENSG00000149639,ENSG00000165699,ENSG00000160803,ENSG00000085733,ENSG00000126247,ENSG00000109083,ENSG00000014216,ENSG00000032742,ENSG00000196235,ENSG00000177169,ENSG00000160948,ENSG00000167671…
GO:0034399	nuclear periphery	cellular_component	0.0018071	0.13322	16	1033	133	19500	ENSG00000141644,ENSG00000140464,ENSG00000159788,ENSG00000137497,ENSG00000198563,ENSG00000172757,ENSG00000165802,ENSG00000165702,ENSG00000204435,ENSG00000160789,ENSG00000011243,ENSG00000215021,ENSG00000145214,ENSG00000197299,ENSG00000111676,ENSG00000196498
GO:0006796	phosphate-containing compound metabolic process	biological_process	0.0018213	0.1335	206	1033	3228	19500	ENSG00000102125,ENSG00000163349,ENSG00000106462,ENSG00000122641,ENSG00000161217,ENSG00000172992,ENSG00000108953,ENSG00000204673,ENSG00000140464,ENSG00000198915,ENSG00000168890,ENSG00000149923,ENSG00000110651,ENSG00000129071,ENSG00000168918,ENSG00000007541,ENSG00000047230,ENSG00000196576,ENSG00000011243,ENSG00000070770,ENSG00000103056,ENSG00000126458,ENSG00000143774,ENSG00000100300,ENSG00000090339…
GO:0043066	negative regulation of apoptotic process	biological_process	0.0018235	0.1335	67	1033	881	19500	ENSG00000170633,ENSG00000169242,ENSG00000130427,ENSG00000175505,ENSG00000123384,ENSG00000176170,ENSG00000185499,ENSG00000105701,ENSG00000072163,ENSG00000102879,ENSG00000062524,ENSG00000158941,ENSG00000131871,ENSG00000178719,ENSG00000105639,ENSG00000197283,ENSG00000120899,ENSG00000087586,ENSG00000172757,ENSG00000173039,ENSG00000196588,ENSG00000087088,ENSG00000166851,ENSG00000141837,ENSG00000137275…
GO:0017111	nucleoside-triphosphatase activity	molecular_function	0.0018501	0.13498	64	1033	834	19500	ENSG00000139890,ENSG00000142945,ENSG00000197562,ENSG00000241837,ENSG00000137171,ENSG00000126214,ENSG00000197879,ENSG00000139832,ENSG00000184640,ENSG00000166508,ENSG00000100228,ENSG00000197586,ENSG00000108883,ENSG00000067596,ENSG00000080603,ENSG00000258947,ENSG00000114770,ENSG00000167461,ENSG00000079974,ENSG00000157349,ENSG00000171130,ENSG00000117410,ENSG00000123064,ENSG00000198563,ENSG00000099331…
GO:1903320	regulation of protein modification by small protein conjugation or removal	biological_process	0.0018775	0.13617	26	1033	265	19500	ENSG00000141480,ENSG00000100300,ENSG00000170315,ENSG00000181790,ENSG00000187446,ENSG00000120899,ENSG00000070770,ENSG00000160948,ENSG00000169689,ENSG00000110200,ENSG00000176170,ENSG00000173039,ENSG00000140464,ENSG00000135924,ENSG00000162517,ENSG00000167110,ENSG00000101266,ENSG00000096384,ENSG00000072609,ENSG00000154473,ENSG00000166851,ENSG00000063244,ENSG00000116670,ENSG00000167770,ENSG00000071539…
GO:0044437	vacuolar part	cellular_component	0.0018792	0.13617	46	1033	556	19500	ENSG00000198246,ENSG00000064601,ENSG00000177169,ENSG00000106348,ENSG00000103148,ENSG00000101425,ENSG00000162144,ENSG00000165782,ENSG00000185339,ENSG00000181045,ENSG00000096384,ENSG00000143882,ENSG00000254901,ENSG00000180448,ENSG00000172232,ENSG00000164535,ENSG00000196743,ENSG00000127415,ENSG00000164687,ENSG00000161203,ENSG00000078369,ENSG00000117410,ENSG00000172354,ENSG00000073060,ENSG00000135441…
GO:0021762	substantia nigra development	biological_process	0.0019212	0.13873	8	1033	44	19500	ENSG00000126267,ENSG00000160014,ENSG00000213619,ENSG00000068903,ENSG00000160211,ENSG00000108515,ENSG00000108953,ENSG00000127561
GO:0006650	glycerophospholipid metabolic process	biological_process	0.0019375	0.139	32	1033	350	19500	ENSG00000168918,ENSG00000007541,ENSG00000129219,ENSG00000184381,ENSG00000119227,ENSG00000169692,ENSG00000168890,ENSG00000136699,ENSG00000105647,ENSG00000161217,ENSG00000065361,ENSG00000149527,ENSG00000102125,ENSG00000141506,ENSG00000241878,ENSG00000198825,ENSG00000145214,ENSG00000103066,ENSG00000100439,ENSG00000103502,ENSG00000165782,ENSG00000143845,ENSG00000006007,ENSG00000143393,ENSG00000174915…
GO:0005635	nuclear envelope	cellular_component	0.0019379	0.139	39	1033	452	19500	ENSG00000167895,ENSG00000087088,ENSG00000165802,ENSG00000102882,ENSG00000100242,ENSG00000169371,ENSG00000082898,ENSG00000157349,ENSG00000137880,ENSG00000167468,ENSG00000187486,ENSG00000160789,ENSG00000124688,ENSG00000052749,ENSG00000167302,ENSG00000135924,ENSG00000122359,ENSG00000171552,ENSG00000196230,ENSG00000091732,ENSG00000136717,ENSG00000100401,ENSG00000064419,ENSG00000197879,ENSG00000161217…
GO:0006611	protein export from nucleus	biological_process	0.0019551	0.13972	9	1033	54	19500	ENSG00000132507,ENSG00000148737,ENSG00000082898,ENSG00000102898,ENSG00000187446,ENSG00000100401,ENSG00000108953,ENSG00000169180,ENSG00000266173
GO:0017048	Rho GTPase binding	molecular_function	0.0019611	0.13972	13	1033	98	19500	ENSG00000114993,ENSG00000089820,ENSG00000137843,ENSG00000099331,ENSG00000128283,ENSG00000108518,ENSG00000149798,ENSG00000141522,ENSG00000188277,ENSG00000173327,ENSG00000196924,ENSG00000131504,ENSG00000015285
GO:0051402	neuron apoptotic process	biological_process	0.0019776	0.14043	23	1033	225	19500	ENSG00000197283,ENSG00000120899,ENSG00000174775,ENSG00000102879,ENSG00000141480,ENSG00000105327,ENSG00000164362,ENSG00000111676,ENSG00000160211,ENSG00000141837,ENSG00000096384,ENSG00000125952,ENSG00000065361,ENSG00000173327,ENSG00000113742,ENSG00000165802,ENSG00000149428,ENSG00000123384,ENSG00000130725,ENSG00000087088,ENSG00000204673,ENSG00000171552,ENSG00000175505
GO:0043523	regulation of neuron apoptotic process	biological_process	0.0020645	0.14601	21	1033	199	19500	ENSG00000141837,ENSG00000096384,ENSG00000065361,ENSG00000173327,ENSG00000113742,ENSG00000149428,ENSG00000165802,ENSG00000130725,ENSG00000123384,ENSG00000087088,ENSG00000204673,ENSG00000171552,ENSG00000175505,ENSG00000120899,ENSG00000197283,ENSG00000174775,ENSG00000141480,ENSG00000102879,ENSG00000105327,ENSG00000164362,ENSG00000160211
GO:0048857	neural nucleus development	biological_process	0.0020739	0.14601	10	1033	65	19500	ENSG00000160211,ENSG00000068903,ENSG00000108953,ENSG00000149571,ENSG00000108515,ENSG00000127561,ENSG00000126267,ENSG00000160014,ENSG00000213619,ENSG00000141837
GO:0048519	negative regulation of biological process	biological_process	0.0020769	0.14601	308	1033	5054	19500	ENSG00000181722,ENSG00000079805,ENSG00000135924,ENSG00000173821,ENSG00000196924,ENSG00000070770,ENSG00000196576,ENSG00000089327,ENSG00000168918,ENSG00000135916,ENSG00000100142,ENSG00000197299,ENSG00000090339,ENSG00000111676,ENSG00000100300,ENSG00000126458,ENSG00000158773,ENSG00000149131,ENSG00000137880,ENSG00000213619,ENSG00000167895,ENSG00000167851,ENSG00000234465,ENSG00000172057,ENSG00000168874…
GO:0048584	positive regulation of response to stimulus	biological_process	0.0021011	0.14683	151	1033	2283	19500	ENSG00000165699,ENSG00000164362,ENSG00000141480,ENSG00000068971,ENSG00000136305,ENSG00000185527,ENSG00000129465,ENSG00000213654,ENSG00000127533,ENSG00000135299,ENSG00000129757,ENSG00000187147,ENSG00000106245,ENSG00000125347,ENSG00000026950,ENSG00000166900,ENSG00000164050,ENSG00000013725,ENSG00000107338,ENSG00000096996,ENSG00000120899,ENSG00000112799,ENSG00000167965,ENSG00000175505,ENSG00000169242…
GO:0010977	negative regulation of neuron projection development	biological_process	0.0021078	0.14683	16	1033	135	19500	ENSG00000089820,ENSG00000123384,ENSG00000004478,ENSG00000169242,ENSG00000114745,ENSG00000078699,ENSG00000120949,ENSG00000165699,ENSG00000133216,ENSG00000130175,ENSG00000071054,ENSG00000197283,ENSG00000141522,ENSG00000198825,ENSG00000184014,ENSG00000135916
GO:1901652	response to peptide	biological_process	0.0021094	0.14683	40	1033	469	19500	ENSG00000172209,ENSG00000138031,ENSG00000130522,ENSG00000173039,ENSG00000171130,ENSG00000117410,ENSG00000125952,ENSG00000084207,ENSG00000143882,ENSG00000158773,ENSG00000141837,ENSG00000127528,ENSG00000167461,ENSG00000124160,ENSG00000127948,ENSG00000165699,ENSG00000149639,ENSG00000108840,ENSG00000175866,ENSG00000160691,ENSG00000166986,ENSG00000163884,ENSG00000123384,ENSG00000142330,ENSG00000106976…
GO:0006793	phosphorus metabolic process	biological_process	0.0021549	0.14951	209	1033	3292	19500	ENSG00000166548,ENSG00000111669,ENSG00000100100,ENSG00000140474,ENSG00000068001,ENSG00000172232,ENSG00000125648,ENSG00000084207,ENSG00000113716,ENSG00000143393,ENSG00000108515,ENSG00000160014,ENSG00000069424,ENSG00000102893,ENSG00000241878,ENSG00000100439,ENSG00000157593,ENSG00000163945,ENSG00000149925,ENSG00000179335,ENSG00000184058,ENSG00000141551,ENSG00000128563,ENSG00000204435,ENSG00000214517…
GO:0010498	proteasomal protein catabolic process	biological_process	0.0021636	0.14963	38	1033	440	19500	ENSG00000110200,ENSG00000168159,ENSG00000154473,ENSG00000171100,ENSG00000096384,ENSG00000166851,ENSG00000162298,ENSG00000274897,ENSG00000158062,ENSG00000185825,ENSG00000141480,ENSG00000167977,ENSG00000092871,ENSG00000213923,ENSG00000135506,ENSG00000160803,ENSG00000089053,ENSG00000170633,ENSG00000166963,ENSG00000141551,ENSG00000114626,ENSG00000068903,ENSG00000140464,ENSG00000079999,ENSG00000135924…
GO:0035601	protein deacylation	biological_process	0.0021849	0.15022	14	1033	111	19500	ENSG00000061273,ENSG00000160685,ENSG00000135365,ENSG00000072310,ENSG00000011009,ENSG00000158941,ENSG00000068903,ENSG00000077463,ENSG00000111642,ENSG00000127511,ENSG00000168522,ENSG00000011243,ENSG00000102409,ENSG00000108840
GO:0008360	regulation of cell shape	biological_process	0.0021864	0.15022	17	1033	148	19500	ENSG00000149798,ENSG00000128283,ENSG00000141551,ENSG00000120318,ENSG00000071127,ENSG00000102879,ENSG00000164050,ENSG00000213923,ENSG00000090339,ENSG00000149925,ENSG00000131504,ENSG00000188277,ENSG00000196576,ENSG00000120899,ENSG00000175866,ENSG00000141522,ENSG00000176438
GO:0070887	cellular response to chemical stimulus	biological_process	0.0021968	0.15045	191	1033	2978	19500	ENSG00000188186,ENSG00000166508,ENSG00000176973,ENSG00000068903,ENSG00000163884,ENSG00000079999,ENSG00000005206,ENSG00000130427,ENSG00000176170,ENSG00000123159,ENSG00000136710,ENSG00000116815,ENSG00000185499,ENSG00000100401,ENSG00000198909,ENSG00000102879,ENSG00000062524,ENSG00000087274,ENSG00000011485,ENSG00000160685,ENSG00000131871,ENSG00000067225,ENSG00000143546,ENSG00000105639,ENSG00000168522…
GO:0070062	extracellular exosome	cellular_component	0.0022442	0.15201	142	1033	2133	19500	ENSG00000165816,ENSG00000075413,ENSG00000106992,ENSG00000166900,ENSG00000181218,ENSG00000170909,ENSG00000137496,ENSG00000187446,ENSG00000131446,ENSG00000108107,ENSG00000211445,ENSG00000160948,ENSG00000122359,ENSG00000135124,ENSG00000120949,ENSG00000197879,ENSG00000163382,ENSG00000133313,ENSG00000136279,ENSG00000108518,ENSG00000258947,ENSG00000167461,ENSG00000136143,ENSG00000011009,ENSG00000014216…
GO:0044260	cellular macromolecule metabolic process	biological_process	0.0022446	0.15201	513	1033	8838	19500	ENSG00000171100,ENSG00000142186,ENSG00000197114,ENSG00000127528,ENSG00000106245,ENSG00000169718,ENSG00000159479,ENSG00000129465,ENSG00000102901,ENSG00000108883,ENSG00000155660,ENSG00000130175,ENSG00000124444,ENSG00000108518,ENSG00000059758,ENSG00000143621,ENSG00000122679,ENSG00000077312,ENSG00000170633,ENSG00000175221,ENSG00000149600,ENSG00000171467,ENSG00000132879,ENSG00000075413,ENSG00000164068…
GO:0090199	regulation of release of cytochrome c from mitochondria	biological_process	0.0022463	0.15201	8	1033	45	19500	ENSG00000087088,ENSG00000171552,ENSG00000105327,ENSG00000141480,ENSG00000160789,ENSG00000184381,ENSG00000011422,ENSG00000136305
GO:0032535	regulation of cellular component size	biological_process	0.0022481	0.15201	31	1033	339	19500	ENSG00000188277,ENSG00000120899,ENSG00000175866,ENSG00000167965,ENSG00000042493,ENSG00000015285,ENSG00000085733,ENSG00000071051,ENSG00000165699,ENSG00000087274,ENSG00000090339,ENSG00000102879,ENSG00000108518,ENSG00000196405,ENSG00000100151,ENSG00000197879,ENSG00000079805,ENSG00000096384,ENSG00000141968,ENSG00000100092,ENSG00000071127,ENSG00000089820,ENSG00000136802,ENSG00000161203,ENSG00000204673…
GO:0017016	Ras GTPase binding	molecular_function	0.0023163	0.15612	28	1033	297	19500	ENSG00000167461,ENSG00000108518,ENSG00000169180,ENSG00000137843,ENSG00000133138,ENSG00000196924,ENSG00000131504,ENSG00000188277,ENSG00000141522,ENSG00000177169,ENSG00000141258,ENSG00000102898,ENSG00000184014,ENSG00000109083,ENSG00000015285,ENSG00000089820,ENSG00000130733,ENSG00000114993,ENSG00000204392,ENSG00000149798,ENSG00000128283,ENSG00000099331,ENSG00000100401,ENSG00000173327,ENSG00000197879…
GO:0065010	extracellular membrane-bounded organelle	cellular_component	0.0023248	0.1562	142	1033	2135	19500	ENSG00000039523,ENSG00000086730,ENSG00000117385,ENSG00000182199,ENSG00000159212,ENSG00000163344,ENSG00000102879,ENSG00000143546,ENSG00000067225,ENSG00000125458,ENSG00000203814,ENSG00000042493,ENSG00000011451,ENSG00000171298,ENSG00000167671,ENSG00000108578,ENSG00000043143,ENSG00000185499,ENSG00000116815,ENSG00000123159,ENSG00000149639,ENSG00000137078,ENSG00000004455,ENSG00000064601,ENSG00000166145…
GO:0010821	regulation of mitochondrion organization	biological_process	0.0023666	0.1585	20	1033	188	19500	ENSG00000100300,ENSG00000072310,ENSG00000182199,ENSG00000156990,ENSG00000105327,ENSG00000141480,ENSG00000182768,ENSG00000184381,ENSG00000160789,ENSG00000070770,ENSG00000085733,ENSG00000011422,ENSG00000148824,ENSG00000136305,ENSG00000087088,ENSG00000171552,ENSG00000108953,ENSG00000110931,ENSG00000163930,ENSG00000155906
GO:1903561	extracellular vesicle	cellular_component	0.0024046	0.16054	143	1033	2154	19500	ENSG00000159674,ENSG00000164687,ENSG00000078369,ENSG00000137497,ENSG00000172354,ENSG00000167895,ENSG00000167851,ENSG00000175130,ENSG00000071127,ENSG00000104894,ENSG00000096384,ENSG00000079819,ENSG00000149131,ENSG00000168003,ENSG00000167770,ENSG00000167815,ENSG00000124570,ENSG00000052344,ENSG00000147533,ENSG00000167468,ENSG00000160211,ENSG00000103066,ENSG00000141522,ENSG00000175866,ENSG00000166986…
GO:0012506	vesicle membrane	cellular_component	0.0024166	0.16084	55	1033	702	19500	ENSG00000145740,ENSG00000167302,ENSG00000145214,ENSG00000071051,ENSG00000172057,ENSG00000131504,ENSG00000069424,ENSG00000174871,ENSG00000185236,ENSG00000162236,ENSG00000124570,ENSG00000167461,ENSG00000124104,ENSG00000006007,ENSG00000100151,ENSG00000167613,ENSG00000122986,ENSG00000142186,ENSG00000172232,ENSG00000111186,ENSG00000005844,ENSG00000073060,ENSG00000171130,ENSG00000167851,ENSG00000164687…
GO:0043230	extracellular organelle	cellular_component	0.0024901	0.16521	143	1033	2156	19500	ENSG00000149639,ENSG00000137078,ENSG00000004455,ENSG00000064601,ENSG00000166145,ENSG00000161203,ENSG00000087088,ENSG00000073060,ENSG00000127415,ENSG00000111186,ENSG00000172757,ENSG00000005844,ENSG00000157349,ENSG00000172939,ENSG00000166278,ENSG00000039523,ENSG00000086730,ENSG00000117385,ENSG00000182199,ENSG00000163344,ENSG00000159212,ENSG00000102879,ENSG00000143546,ENSG00000067225,ENSG00000203814…
GO:0051130	positive regulation of cellular component organization	biological_process	0.0025041	0.16562	89	1033	1249	19500	ENSG00000148737,ENSG00000071127,ENSG00000185482,ENSG00000137270,ENSG00000110931,ENSG00000121753,ENSG00000172232,ENSG00000137497,ENSG00000181790,ENSG00000175866,ENSG00000141522,ENSG00000174775,ENSG00000187486,ENSG00000135100,ENSG00000158321,ENSG00000134013,ENSG00000106976,ENSG00000106462,ENSG00000079805,ENSG00000078699,ENSG00000163930,ENSG00000124772,ENSG00000051523,ENSG00000013573,ENSG00000155906…
GO:0016607	nuclear speck	cellular_component	0.002526	0.16655	34	1033	385	19500	ENSG00000173933,ENSG00000163349,ENSG00000188486,ENSG00000170633,ENSG00000179335,ENSG00000100116,ENSG00000071564,ENSG00000011243,ENSG00000205323,ENSG00000116350,ENSG00000129071,ENSG00000104852,ENSG00000140553,ENSG00000197976,ENSG00000172888,ENSG00000204227,ENSG00000162385,ENSG00000010318,ENSG00000063244,ENSG00000141644,ENSG00000105298,ENSG00000204371,ENSG00000198563,ENSG00000100813,ENSG00000182872…
GO:0030036	actin cytoskeleton organization	biological_process	0.0025747	0.16809	49	1033	611	19500	ENSG00000167460,ENSG00000042493,ENSG00000167965,ENSG00000015285,ENSG00000124313,ENSG00000196924,ENSG00000160993,ENSG00000120899,ENSG00000102879,ENSG00000137843,ENSG00000087274,ENSG00000090339,ENSG00000100092,ENSG00000142330,ENSG00000052841,ENSG00000116670,ENSG00000197879,ENSG00000128283,ENSG00000149798,ENSG00000144488,ENSG00000136717,ENSG00000155366,ENSG00000123384,ENSG00000085733,ENSG00000071051…
GO:0046475	glycerophospholipid catabolic process	biological_process	0.0025779	0.16809	5	1033	19	19500	ENSG00000136699,ENSG00000006007,ENSG00000103066,ENSG00000198825,ENSG00000073060
GO:0006476	protein deacetylation	biological_process	0.0025851	0.16809	13	1033	101	19500	ENSG00000127511,ENSG00000168522,ENSG00000011243,ENSG00000102409,ENSG00000108840,ENSG00000061273,ENSG00000160685,ENSG00000072310,ENSG00000135365,ENSG00000068903,ENSG00000158941,ENSG00000077463,ENSG00000111642
GO:0098732	macromolecule deacylation	biological_process	0.0025856	0.16809	14	1033	113	19500	ENSG00000011243,ENSG00000127511,ENSG00000168522,ENSG00000108840,ENSG00000102409,ENSG00000158941,ENSG00000011009,ENSG00000068903,ENSG00000077463,ENSG00000111642,ENSG00000160685,ENSG00000061273,ENSG00000135365,ENSG00000072310
GO:0070231	T cell apoptotic process	biological_process	0.0026048	0.16809	8	1033	46	19500	ENSG00000105639,ENSG00000157514,ENSG00000137275,ENSG00000087088,ENSG00000129465,ENSG00000169242,ENSG00000105327,ENSG00000166925
GO:0051219	phosphoprotein binding	molecular_function	0.0026123	0.16809	11	1033	78	19500	ENSG00000105647,ENSG00000107338,ENSG00000004478,ENSG00000108953,ENSG00000102882,ENSG00000160691,ENSG00000110786,ENSG00000130175,ENSG00000071051,ENSG00000087266,ENSG00000141968
GO:0003836	beta-galactoside (CMP) alpha-2,3-sialyltransferase activity	molecular_function	0.0026285	0.16809	3	1033	6	19500	ENSG00000115525,ENSG00000110080,ENSG00000126091
GO:0090166	Golgi disassembly	biological_process	0.0026285	0.16809	3	1033	6	19500	ENSG00000167110,ENSG00000107862,ENSG00000162236
GO:0016479	negative regulation of transcription from RNA polymerase I promoter	biological_process	0.0026285	0.16809	3	1033	6	19500	ENSG00000196924,ENSG00000113648,ENSG00000158796
GO:0045345	positive regulation of MHC class I biosynthetic process	biological_process	0.0026285	0.16809	3	1033	6	19500	ENSG00000142405,ENSG00000179583,ENSG00000140464
GO:0051246	regulation of protein metabolic process	biological_process	0.0026475	0.1688	184	1033	2868	19500	ENSG00000157110,ENSG00000146674,ENSG00000117385,ENSG00000160685,ENSG00000011485,ENSG00000165861,ENSG00000182199,ENSG00000158941,ENSG00000197283,ENSG00000168522,ENSG00000087586,ENSG00000213658,ENSG00000105639,ENSG00000143546,ENSG00000157227,ENSG00000176170,ENSG00000266173,ENSG00000114626,ENSG00000130427,ENSG00000068903,ENSG00000079999,ENSG00000163884,ENSG00000132507,ENSG00000084764,ENSG00000141506…
GO:0009163	nucleoside biosynthetic process	biological_process	0.0027327	0.1737	15	1033	126	19500	ENSG00000241837,ENSG00000166548,ENSG00000143774,ENSG00000130717,ENSG00000076555,ENSG00000106992,ENSG00000106348,ENSG00000047230,ENSG00000067225,ENSG00000004455,ENSG00000172992,ENSG00000157593,ENSG00000138621,ENSG00000149925,ENSG00000102125
GO:0071495	cellular response to endogenous stimulus	biological_process	0.0027699	0.1746	88	1033	1237	19500	ENSG00000165802,ENSG00000005075,ENSG00000102882,ENSG00000172209,ENSG00000138031,ENSG00000117410,ENSG00000173039,ENSG00000171130,ENSG00000204371,ENSG00000185340,ENSG00000141837,ENSG00000127528,ENSG00000129757,ENSG00000167461,ENSG00000141480,ENSG00000149639,ENSG00000165699,ENSG00000166145,ENSG00000170801,ENSG00000160691,ENSG00000131504,ENSG00000188186,ENSG00000176973,ENSG00000166508,ENSG00000123384…
GO:0009058	biosynthetic process	biological_process	0.002773	0.1746	379	1033	6371	19500	ENSG00000004455,ENSG00000160691,ENSG00000113068,ENSG00000180549,ENSG00000006695,ENSG00000071051,ENSG00000132694,ENSG00000163346,ENSG00000149639,ENSG00000137309,ENSG00000141837,ENSG00000101266,ENSG00000159788,ENSG00000132329,ENSG00000175787,ENSG00000198563,ENSG00000171703,ENSG00000183655,ENSG00000164535,ENSG00000059573,ENSG00000143546,ENSG00000138326,ENSG00000129219,ENSG00000011451,ENSG00000156599…
GO:0060545	positive regulation of necroptotic process	biological_process	0.0027975	0.1746	2	1033	2	19500	ENSG00000137275,ENSG00000129465
GO:0009439	cyanate metabolic process	biological_process	0.0028008	0.1746	2	1033	2	19500	ENSG00000128309,ENSG00000128311
GO:0009440	cyanate catabolic process	biological_process	0.0028008	0.1746	2	1033	2	19500	ENSG00000128311,ENSG00000128309
GO:0031022	nuclear migration along microfilament	biological_process	0.0028031	0.1746	2	1033	2	19500	ENSG00000054654,ENSG00000100242
GO:1900195	positive regulation of oocyte maturation	biological_process	0.0028043	0.1746	2	1033	2	19500	ENSG00000087586,ENSG00000068903
GO:0043434	response to peptide hormone	biological_process	0.0028917	0.17951	35	1033	403	19500	ENSG00000067225,ENSG00000105639,ENSG00000114353,ENSG00000116350,ENSG00000111361,ENSG00000105647,ENSG00000160685,ENSG00000090339,ENSG00000072310,ENSG00000131871,ENSG00000165816,ENSG00000054356,ENSG00000051523,ENSG00000100401,ENSG00000197879,ENSG00000142330,ENSG00000163884,ENSG00000166986,ENSG00000175866,ENSG00000160691,ENSG00000108840,ENSG00000165699,ENSG00000149639,ENSG00000124160,ENSG00000167461…
GO:0043198	dendritic shaft	cellular_component	0.0029201	0.18075	7	1033	37	19500	ENSG00000196924,ENSG00000175866,ENSG00000197283,ENSG00000174871,ENSG00000123159,ENSG00000149571,ENSG00000166963
GO:0005905	coated pit	cellular_component	0.0029413	0.18153	10	1033	68	19500	ENSG00000127527,ENSG00000198825,ENSG00000079805,ENSG00000042753,ENSG00000085733,ENSG00000161203,ENSG00000123384,ENSG00000130475,ENSG00000141480,ENSG00000063245
GO:0007005	mitochondrion organization	biological_process	0.0029568	0.18196	52	1033	662	19500	ENSG00000164362,ENSG00000125445,ENSG00000156990,ENSG00000167792,ENSG00000141480,ENSG00000011376,ENSG00000132361,ENSG00000177192,ENSG00000160014,ENSG00000174886,ENSG00000160789,ENSG00000006695,ENSG00000085733,ENSG00000136305,ENSG00000148824,ENSG00000087088,ENSG00000105341,ENSG00000110931,ENSG00000159445,ENSG00000170906,ENSG00000213619,ENSG00000171100,ENSG00000130414,ENSG00000072310,ENSG00000100300…
GO:0032680	regulation of tumor necrosis factor production	biological_process	0.0030251	0.18562	14	1033	115	19500	ENSG00000131871,ENSG00000159674,ENSG00000100300,ENSG00000141480,ENSG00000101425,ENSG00000181722,ENSG00000172232,ENSG00000051523,ENSG00000120949,ENSG00000084207,ENSG00000258839,ENSG00000105298,ENSG00000172936,ENSG00000137275
GO:1901659	glycosyl compound biosynthetic process	biological_process	0.0031836	0.19479	15	1033	128	19500	ENSG00000106992,ENSG00000076555,ENSG00000130717,ENSG00000143774,ENSG00000166548,ENSG00000241837,ENSG00000138621,ENSG00000149925,ENSG00000102125,ENSG00000157593,ENSG00000004455,ENSG00000172992,ENSG00000067225,ENSG00000106348,ENSG00000047230
GO:0016023	cytoplasmic membrane-bounded vesicle	cellular_component	0.00325	0.19828	104	1033	1510	19500	ENSG00000011422,ENSG00000015285,ENSG00000170315,ENSG00000169692,ENSG00000070770,ENSG00000099904,ENSG00000197043,ENSG00000108639,ENSG00000244038,ENSG00000054356,ENSG00000072310,ENSG00000106976,ENSG00000162517,ENSG00000051523,ENSG00000100321,ENSG00000079805,ENSG00000149428,ENSG00000179335,ENSG00000204435,ENSG00000108953,ENSG00000171552,ENSG00000139190,ENSG00000130733,ENSG00000140564,ENSG00000196230…
GO:0023023	MHC protein complex binding	molecular_function	0.0032803	0.19907	5	1033	20	19500	ENSG00000096384,ENSG00000108953,ENSG00000110651,ENSG00000067225,ENSG00000122359
GO:0097285	cell-type specific apoptotic process	biological_process	0.0032817	0.19907	41	1033	496	19500	ENSG00000131871,ENSG00000090339,ENSG00000111676,ENSG00000062524,ENSG00000105327,ENSG00000102879,ENSG00000197283,ENSG00000120899,ENSG00000105639,ENSG00000130725,ENSG00000123384,ENSG00000204673,ENSG00000171552,ENSG00000130427,ENSG00000175505,ENSG00000169242,ENSG00000184058,ENSG00000149428,ENSG00000065361,ENSG00000142330,ENSG00000163349,ENSG00000164362,ENSG00000160211,ENSG00000174775,ENSG00000141480…
GO:0019722	calcium-mediated signaling	biological_process	0.0033166	0.20061	18	1033	167	19500	ENSG00000172232,ENSG00000185825,ENSG00000121753,ENSG00000065361,ENSG00000110931,ENSG00000135124,ENSG00000176170,ENSG00000160014,ENSG00000131196,ENSG00000102908,ENSG00000120899,ENSG00000127129,ENSG00000213658,ENSG00000085872,ENSG00000187446,ENSG00000156026,ENSG00000083454,ENSG00000086730
GO:2000785	regulation of autophagosome assembly	biological_process	0.0034162	0.20605	7	1033	38	19500	ENSG00000177169,ENSG00000032742,ENSG00000204371,ENSG00000148356,ENSG00000103148,ENSG00000109083,ENSG00000171100
GO:0060491	regulation of cell projection assembly	biological_process	0.0035324	0.21245	18	1033	168	19500	ENSG00000079805,ENSG00000187535,ENSG00000185324,ENSG00000184640,ENSG00000128283,ENSG00000149798,ENSG00000177106,ENSG00000139437,ENSG00000032742,ENSG00000188277,ENSG00000015285,ENSG00000109083,ENSG00000054654,ENSG00000090339,ENSG00000158321,ENSG00000174775,ENSG00000108518,ENSG00000196405
GO:0044249	cellular biosynthetic process	biological_process	0.0035817	0.21445	367	1033	6174	19500	ENSG00000083838,ENSG00000087088,ENSG00000196588,ENSG00000173039,ENSG00000073060,ENSG00000132510,ENSG00000102882,ENSG00000005075,ENSG00000166526,ENSG00000138031,ENSG00000173540,ENSG00000172936,ENSG00000137275,ENSG00000113108,ENSG00000177731,ENSG00000167889,ENSG00000141644,ENSG00000130717,ENSG00000117682,ENSG00000174586,ENSG00000110801,ENSG00000125970,ENSG00000106348,ENSG00000121578,ENSG00000068903…
GO:1901214	regulation of neuron death	biological_process	0.0035859	0.21445	27	1033	292	19500	ENSG00000164362,ENSG00000011485,ENSG00000165699,ENSG00000160211,ENSG00000174775,ENSG00000105327,ENSG00000141480,ENSG00000102879,ENSG00000197283,ENSG00000120899,ENSG00000170315,ENSG00000170345,ENSG00000187446,ENSG00000130725,ENSG00000123384,ENSG00000087088,ENSG00000204673,ENSG00000171552,ENSG00000130427,ENSG00000175505,ENSG00000113742,ENSG00000165802,ENSG00000149428,ENSG00000065361,ENSG00000173327…
GO:0009719	response to endogenous stimulus	biological_process	0.0036391	0.21612	112	1033	1650	19500	ENSG00000102879,ENSG00000165816,ENSG00000167548,ENSG00000160685,ENSG00000011485,ENSG00000188779,ENSG00000131871,ENSG00000182749,ENSG00000067225,ENSG00000157227,ENSG00000105639,ENSG00000120057,ENSG00000168522,ENSG00000120899,ENSG00000188186,ENSG00000166508,ENSG00000176973,ENSG00000163884,ENSG00000068903,ENSG00000172482,ENSG00000130427,ENSG00000123384,ENSG00000123159,ENSG00000122679,ENSG00000239282…
GO:0031982	vesicle	cellular_component	0.0036401	0.21612	212	1033	3382	19500	ENSG00000203814,ENSG00000125458,ENSG00000011451,ENSG00000042493,ENSG00000067225,ENSG00000143546,ENSG00000157227,ENSG00000141252,ENSG00000163344,ENSG00000159212,ENSG00000127561,ENSG00000102879,ENSG00000086730,ENSG00000117385,ENSG00000039523,ENSG00000197562,ENSG00000182199,ENSG00000136710,ENSG00000116815,ENSG00000123159,ENSG00000126214,ENSG00000168487,ENSG00000185499,ENSG00000043143,ENSG00000108578…
GO:0046209	nitric oxide metabolic process	biological_process	0.0036442	0.21612	10	1033	70	19500	ENSG00000096384,ENSG00000135124,ENSG00000137880,ENSG00000127528,ENSG00000120899,ENSG00000079805,ENSG00000127948,ENSG00000090339,ENSG00000131871,ENSG00000100300
GO:0061136	regulation of proteasomal protein catabolic process	biological_process	0.0037164	0.21979	21	1033	209	19500	ENSG00000213923,ENSG00000158941,ENSG00000160803,ENSG00000170315,ENSG00000087586,ENSG00000166963,ENSG00000141551,ENSG00000110200,ENSG00000068903,ENSG00000079999,ENSG00000135924,ENSG00000171100,ENSG00000072609,ENSG00000096384,ENSG00000154473,ENSG00000123159,ENSG00000166851,ENSG00000185825,ENSG00000116670,ENSG00000274897,ENSG00000071539
GO:0016462	pyrophosphatase activity	molecular_function	0.0037717	0.22216	65	1033	876	19500	ENSG00000166508,ENSG00000184640,ENSG00000139832,ENSG00000197879,ENSG00000126214,ENSG00000137171,ENSG00000241837,ENSG00000197562,ENSG00000142945,ENSG00000139890,ENSG00000099331,ENSG00000198563,ENSG00000123064,ENSG00000117410,ENSG00000171130,ENSG00000157349,ENSG00000079974,ENSG00000275074,ENSG00000167461,ENSG00000114770,ENSG00000258947,ENSG00000080603,ENSG00000067596,ENSG00000108883,ENSG00000100228…
GO:0044093	positive regulation of molecular function	biological_process	0.0038003	0.22216	115	1033	1703	19500	ENSG00000145214,ENSG00000101109,ENSG00000108840,ENSG00000141522,ENSG00000049541,ENSG00000160014,ENSG00000071054,ENSG00000103148,ENSG00000174775,ENSG00000127948,ENSG00000133138,ENSG00000187486,ENSG00000167110,ENSG00000148737,ENSG00000096384,ENSG00000141968,ENSG00000174791,ENSG00000185482,ENSG00000071205,ENSG00000185825,ENSG00000104814,ENSG00000110931,ENSG00000114745,ENSG00000172232,ENSG00000196743…
GO:0000098	sulfur amino acid catabolic process	biological_process	0.0038019	0.22216	4	1033	13	19500	ENSG00000128311,ENSG00000108578,ENSG00000172482,ENSG00000128309
GO:0043249	erythrocyte maturation	biological_process	0.0038093	0.22216	4	1033	13	19500	ENSG00000160211,ENSG00000130427,ENSG00000127528,ENSG00000198945
GO:0008093	cytoskeletal adaptor activity	molecular_function	0.0038108	0.22216	4	1033	13	19500	ENSG00000071051,ENSG00000166963,ENSG00000185340,ENSG00000175866
GO:0032640	tumor necrosis factor production	biological_process	0.0038332	0.22216	14	1033	118	19500	ENSG00000101425,ENSG00000141480,ENSG00000131871,ENSG00000159674,ENSG00000100300,ENSG00000105298,ENSG00000172936,ENSG00000137275,ENSG00000084207,ENSG00000258839,ENSG00000120949,ENSG00000181722,ENSG00000051523,ENSG00000172232
GO:0032271	regulation of protein polymerization	biological_process	0.0038334	0.22216	20	1033	196	19500	ENSG00000137497,ENSG00000136717,ENSG00000004478,ENSG00000149798,ENSG00000128283,ENSG00000197879,ENSG00000090339,ENSG00000087274,ENSG00000100151,ENSG00000102879,ENSG00000196405,ENSG00000108518,ENSG00000120899,ENSG00000175866,ENSG00000188277,ENSG00000085733,ENSG00000071051,ENSG00000015285,ENSG00000167965,ENSG00000042493
GO:0000209	protein polyubiquitination	biological_process	0.0038403	0.22216	24	1033	251	19500	ENSG00000089053,ENSG00000132879,ENSG00000179526,ENSG00000059145,ENSG00000148356,ENSG00000170315,ENSG00000182670,ENSG00000100023,ENSG00000092871,ENSG00000167770,ENSG00000043143,ENSG00000162298,ENSG00000072609,ENSG00000127585,ENSG00000104343,ENSG00000125826,ENSG00000127452,ENSG00000171621,ENSG00000135108,ENSG00000056586,ENSG00000170633,ENSG00000173821,ENSG00000168159,ENSG00000108578
GO:0005740	mitochondrial envelope	cellular_component	0.0038774	0.2235	56	1033	734	19500	ENSG00000170315,ENSG00000169682,ENSG00000197912,ENSG00000161513,ENSG00000182768,ENSG00000215021,ENSG00000059573,ENSG00000183617,ENSG00000183172,ENSG00000156411,ENSG00000105327,ENSG00000100300,ENSG00000130414,ENSG00000182199,ENSG00000241837,ENSG00000140990,ENSG00000106976,ENSG00000102125,ENSG00000186642,ENSG00000079805,ENSG00000130204,ENSG00000105701,ENSG00000111843,ENSG00000149792,ENSG00000100116…
GO:0006812	cation transport	biological_process	0.0038845	0.2235	78	1033	1088	19500	ENSG00000165915,ENSG00000241837,ENSG00000183172,ENSG00000102879,ENSG00000120899,ENSG00000139890,ENSG00000165125,ENSG00000100991,ENSG00000187446,ENSG00000040487,ENSG00000130427,ENSG00000135124,ENSG00000129657,ENSG00000122679,ENSG00000173826,ENSG00000122986,ENSG00000185339,ENSG00000165699,ENSG00000156026,ENSG00000107745,ENSG00000076555,ENSG00000141480,ENSG00000131504,ENSG00000006695,ENSG00000184014…
GO:0044088	regulation of vacuole organization	biological_process	0.0039255	0.22525	8	1033	49	19500	ENSG00000103148,ENSG00000204371,ENSG00000109083,ENSG00000171100,ENSG00000148356,ENSG00000160803,ENSG00000177169,ENSG00000032742
GO:0006644	phospholipid metabolic process	biological_process	0.0039665	0.22699	38	1033	456	19500	ENSG00000110651,ENSG00000119227,ENSG00000169692,ENSG00000168890,ENSG00000136699,ENSG00000184381,ENSG00000120899,ENSG00000007541,ENSG00000129219,ENSG00000168918,ENSG00000103056,ENSG00000163344,ENSG00000105647,ENSG00000141506,ENSG00000102125,ENSG00000149527,ENSG00000161217,ENSG00000065361,ENSG00000103066,ENSG00000100439,ENSG00000103502,ENSG00000145214,ENSG00000241878,ENSG00000198825,ENSG00000006007…
GO:0015932	nucleobase-containing compound transmembrane transporter activity	molecular_function	0.003983	0.22732	7	1033	39	19500	ENSG00000125648,ENSG00000112759,ENSG00000181830,ENSG00000198246,ENSG00000157593,ENSG00000102100,ENSG00000176087
GO:0009893	positive regulation of metabolic process	biological_process	0.004002	0.22779	234	1033	3779	19500	ENSG00000123384,ENSG00000171467,ENSG00000179583,ENSG00000175505,ENSG00000169241,ENSG00000175221,ENSG00000160948,ENSG00000169242,ENSG00000149798,ENSG00000197879,ENSG00000120949,ENSG00000136279,ENSG00000116670,ENSG00000135124,ENSG00000072609,ENSG00000122679,ENSG00000143621,ENSG00000125347,ENSG00000164050,ENSG00000120899,ENSG00000141258,ENSG00000112561,ENSG00000187446,ENSG00000167965,ENSG00000137073…
GO:0061024	membrane organization	biological_process	0.0040534	0.2301	89	1033	1271	19500	ENSG00000185482,ENSG00000167110,ENSG00000054116,ENSG00000100139,ENSG00000159445,ENSG00000127527,ENSG00000114745,ENSG00000068001,ENSG00000132881,ENSG00000167851,ENSG00000181790,ENSG00000160803,ENSG00000160014,ENSG00000143740,ENSG00000175866,ENSG00000185236,ENSG00000187486,ENSG00000174775,ENSG00000063245,ENSG00000133138,ENSG00000147533,ENSG00000168397,ENSG00000106976,ENSG00000162517,ENSG00000102125…
GO:0016817	hydrolase activity, acting on acid anhydrides	molecular_function	0.0040755	0.23013	65	1033	879	19500	ENSG00000144028,ENSG00000166592,ENSG00000259431,ENSG00000196642,ENSG00000143375,ENSG00000174775,ENSG00000092841,ENSG00000017260,ENSG00000007174,ENSG00000049541,ENSG00000185236,ENSG00000172432,ENSG00000148824,ENSG00000172354,ENSG00000078369,ENSG00000100813,ENSG00000132881,ENSG00000096384,ENSG00000143882,ENSG00000037042,ENSG00000107331,ENSG00000197299,ENSG00000126458,ENSG00000005007,ENSG00000074370…
GO:0016818	hydrolase activity, acting on acid anhydrides, in phosphorus-containing anhydrides	molecular_function	0.0040755	0.23013	65	1033	879	19500	ENSG00000184640,ENSG00000166508,ENSG00000197879,ENSG00000126214,ENSG00000139832,ENSG00000241837,ENSG00000197562,ENSG00000137171,ENSG00000139890,ENSG00000142945,ENSG00000198563,ENSG00000117410,ENSG00000123064,ENSG00000171130,ENSG00000099331,ENSG00000079974,ENSG00000157349,ENSG00000080603,ENSG00000275074,ENSG00000114770,ENSG00000167461,ENSG00000258947,ENSG00000197586,ENSG00000100228,ENSG00000067596…
GO:0004198	calcium-dependent cysteine-type endopeptidase activity	molecular_function	0.0041095	0.23143	5	1033	21	19500	ENSG00000149260,ENSG00000126247,ENSG00000014216,ENSG00000142330,ENSG00000162517
GO:1903555	regulation of tumor necrosis factor superfamily cytokine production	biological_process	0.0041386	0.23227	14	1033	119	19500	ENSG00000181722,ENSG00000051523,ENSG00000172232,ENSG00000120949,ENSG00000084207,ENSG00000258839,ENSG00000105298,ENSG00000172936,ENSG00000137275,ENSG00000131871,ENSG00000159674,ENSG00000100300,ENSG00000141480,ENSG00000101425
GO:0042455	ribonucleoside biosynthetic process	biological_process	0.0041462	0.23227	14	1033	119	19500	ENSG00000157593,ENSG00000138621,ENSG00000102125,ENSG00000149925,ENSG00000047230,ENSG00000106348,ENSG00000067225,ENSG00000004455,ENSG00000172992,ENSG00000076555,ENSG00000106992,ENSG00000241837,ENSG00000143774,ENSG00000130717
GO:0007015	actin filament organization	biological_process	0.0041875	0.23396	32	1033	368	19500	ENSG00000155366,ENSG00000128283,ENSG00000149798,ENSG00000144488,ENSG00000136717,ENSG00000116670,ENSG00000052841,ENSG00000197879,ENSG00000100092,ENSG00000087274,ENSG00000090339,ENSG00000102879,ENSG00000196924,ENSG00000120899,ENSG00000042493,ENSG00000167460,ENSG00000167965,ENSG00000015285,ENSG00000172757,ENSG00000113758,ENSG00000179057,ENSG00000071127,ENSG00000165699,ENSG00000108518,ENSG00000196405…
GO:0019866	organelle inner membrane	cellular_component	0.004259	0.23733	42	1033	519	19500	ENSG00000170906,ENSG00000213619,ENSG00000125648,ENSG00000126267,ENSG00000159445,ENSG00000100242,ENSG00000105341,ENSG00000177542,ENSG00000095321,ENSG00000006695,ENSG00000148824,ENSG00000241878,ENSG00000174886,ENSG00000197785,ENSG00000167792,ENSG00000197119,ENSG00000125445,ENSG00000107745,ENSG00000156026,ENSG00000135469,ENSG00000135124,ENSG00000102125,ENSG00000140990,ENSG00000186642,ENSG00000130204…
GO:0009133	nucleoside diphosphate biosynthetic process	biological_process	0.0043704	0.24275	3	1033	7	19500	ENSG00000106992,ENSG00000004455,ENSG00000143774
GO:0031966	mitochondrial membrane	cellular_component	0.0043923	0.24275	53	1033	691	19500	ENSG00000160014,ENSG00000174886,ENSG00000177169,ENSG00000241878,ENSG00000148824,ENSG00000006695,ENSG00000156026,ENSG00000135469,ENSG00000107745,ENSG00000125445,ENSG00000197119,ENSG00000076555,ENSG00000143393,ENSG00000167792,ENSG00000197785,ENSG00000159445,ENSG00000125648,ENSG00000126267,ENSG00000213619,ENSG00000170906,ENSG00000095321,ENSG00000177542,ENSG00000105341,ENSG00000087088,ENSG00000143554…
GO:0045341	MHC class I biosynthetic process	biological_process	0.0044191	0.24275	3	1033	7	19500	ENSG00000179583,ENSG00000140464,ENSG00000142405
GO:0045343	regulation of MHC class I biosynthetic process	biological_process	0.0044191	0.24275	3	1033	7	19500	ENSG00000179583,ENSG00000140464,ENSG00000142405
GO:0032956	regulation of actin cytoskeleton organization	biological_process	0.0044282	0.24275	28	1033	311	19500	ENSG00000100092,ENSG00000071127,ENSG00000185324,ENSG00000197879,ENSG00000149798,ENSG00000128283,ENSG00000172757,ENSG00000136717,ENSG00000123384,ENSG00000155366,ENSG00000167965,ENSG00000042493,ENSG00000085733,ENSG00000071051,ENSG00000015285,ENSG00000196924,ENSG00000188277,ENSG00000175866,ENSG00000120899,ENSG00000141522,ENSG00000102879,ENSG00000196405,ENSG00000108518,ENSG00000100151,ENSG00000174775…
GO:0072593	reactive oxygen species metabolic process	biological_process	0.0044294	0.24275	24	1033	254	19500	ENSG00000137880,ENSG00000135124,ENSG00000127528,ENSG00000137275,ENSG00000213619,ENSG00000141968,ENSG00000084207,ENSG00000096384,ENSG00000079805,ENSG00000051523,ENSG00000211445,ENSG00000107862,ENSG00000129465,ENSG00000068903,ENSG00000181790,ENSG00000120899,ENSG00000114353,ENSG00000275700,ENSG00000127948,ENSG00000167815,ENSG00000131871,ENSG00000090339,ENSG00000100300,ENSG00000160211
GO:0031334	positive regulation of protein complex assembly	biological_process	0.0044512	0.24275	23	1033	240	19500	ENSG00000120899,ENSG00000175866,ENSG00000188277,ENSG00000015285,ENSG00000085733,ENSG00000071051,ENSG00000167965,ENSG00000090339,ENSG00000100151,ENSG00000196405,ENSG00000108518,ENSG00000135100,ENSG00000100721,ENSG00000105327,ENSG00000102879,ENSG00000068971,ENSG00000197879,ENSG00000087088,ENSG00000155366,ENSG00000137497,ENSG00000136717,ENSG00000128283,ENSG00000149798
GO:1903428	positive regulation of reactive oxygen species biosynthetic process	biological_process	0.004456	0.24275	8	1033	50	19500	ENSG00000051523,ENSG00000079805,ENSG00000120899,ENSG00000096384,ENSG00000181790,ENSG00000135124,ENSG00000127528,ENSG00000090339
GO:1902017	regulation of cilium assembly	biological_process	0.0044592	0.24275	8	1033	50	19500	ENSG00000079805,ENSG00000139437,ENSG00000032742,ENSG00000187535,ENSG00000185324,ENSG00000109083,ENSG00000054654,ENSG00000184640
GO:0007167	enzyme linked receptor protein signaling pathway	biological_process	0.0045158	0.24521	74	1033	1029	19500	ENSG00000170801,ENSG00000160691,ENSG00000185527,ENSG00000071051,ENSG00000165699,ENSG00000149639,ENSG00000141480,ENSG00000133216,ENSG00000068971,ENSG00000129757,ENSG00000197114,ENSG00000173039,ENSG00000171130,ENSG00000117410,ENSG00000161203,ENSG00000005075,ENSG00000102882,ENSG00000114738,ENSG00000105639,ENSG00000120057,ENSG00000120899,ENSG00000168522,ENSG00000027869,ENSG00000160685,ENSG00000188779…
GO:0044297	cell body	cellular_component	0.0045388	0.24582	43	1033	536	19500	ENSG00000188779,ENSG00000011485,ENSG00000054356,ENSG00000146005,ENSG00000134294,ENSG00000087586,ENSG00000120899,ENSG00000114353,ENSG00000108107,ENSG00000196924,ENSG00000170315,ENSG00000196230,ENSG00000123384,ENSG00000185800,ENSG00000130427,ENSG00000068903,ENSG00000166963,ENSG00000004478,ENSG00000172534,ENSG00000163382,ENSG00000126214,ENSG00000124772,ENSG00000051523,ENSG00000135124,ENSG00000167461…
GO:0016310	phosphorylation	biological_process	0.0045907	0.24794	150	1033	2313	19500	ENSG00000166851,ENSG00000170906,ENSG00000197114,ENSG00000142186,ENSG00000129757,ENSG00000135299,ENSG00000129465,ENSG00000077463,ENSG00000185527,ENSG00000113648,ENSG00000088325,ENSG00000141480,ENSG00000068971,ENSG00000165699,ENSG00000059758,ENSG00000122679,ENSG00000136279,ENSG00000116670,ENSG00000173020,ENSG00000105701,ENSG00000169727,ENSG00000169242,ENSG00000175505,ENSG00000179583,ENSG00000167965…
GO:0000118	histone deacetylase complex	cellular_component	0.0046013	0.24794	9	1033	61	19500	ENSG00000127511,ENSG00000108840,ENSG00000165821,ENSG00000101266,ENSG00000111642,ENSG00000135365,ENSG00000061273,ENSG00000196498,ENSG00000109118
GO:0032507	maintenance of protein location in cell	biological_process	0.0046867	0.25191	11	1033	84	19500	ENSG00000146232,ENSG00000196924,ENSG00000138757,ENSG00000113758,ENSG00000176438,ENSG00000079999,ENSG00000140464,ENSG00000100300,ENSG00000135506,ENSG00000054654,ENSG00000100242
GO:0005096	GTPase activator activity	molecular_function	0.0048148	0.25814	26	1033	284	19500	ENSG00000132694,ENSG00000105647,ENSG00000164050,ENSG00000103148,ENSG00000133138,ENSG00000138835,ENSG00000133612,ENSG00000188277,ENSG00000197283,ENSG00000141522,ENSG00000141258,ENSG00000108262,ENSG00000089820,ENSG00000159788,ENSG00000242247,ENSG00000149798,ENSG00000128283,ENSG00000099331,ENSG00000100401,ENSG00000180448,ENSG00000071205,ENSG00000184060,ENSG00000130052,ENSG00000100092,ENSG00000174791…
GO:0070997	neuron death	biological_process	0.0049298	0.26346	29	1033	328	19500	ENSG00000141837,ENSG00000125952,ENSG00000096384,ENSG00000065361,ENSG00000173327,ENSG00000113742,ENSG00000149428,ENSG00000165802,ENSG00000087088,ENSG00000204673,ENSG00000130725,ENSG00000123384,ENSG00000175505,ENSG00000130427,ENSG00000171552,ENSG00000170315,ENSG00000187446,ENSG00000170345,ENSG00000120899,ENSG00000197283,ENSG00000174775,ENSG00000105327,ENSG00000141480,ENSG00000102879,ENSG00000164362…
GO:0098772	molecular function regulator	molecular_function	0.0049407	0.26346	100	1033	1464	19500	ENSG00000100092,ENSG00000129657,ENSG00000141506,ENSG00000136279,ENSG00000100401,ENSG00000169727,ENSG00000149798,ENSG00000188186,ENSG00000175221,ENSG00000130427,ENSG00000114993,ENSG00000266173,ENSG00000137496,ENSG00000187446,ENSG00000167965,ENSG00000182957,ENSG00000105639,ENSG00000213658,ENSG00000141258,ENSG00000168522,ENSG00000197283,ENSG00000146674,ENSG00000146005,ENSG00000164050,ENSG00000158941…
GO:2001057	reactive nitrogen species metabolic process	biological_process	0.0049523	0.26346	10	1033	73	19500	ENSG00000127948,ENSG00000100300,ENSG00000131871,ENSG00000090339,ENSG00000096384,ENSG00000137880,ENSG00000127528,ENSG00000135124,ENSG00000079805,ENSG00000120899
GO:0031400	negative regulation of protein modification process	biological_process	0.0049637	0.26346	53	1033	695	19500	ENSG00000068001,ENSG00000167770,ENSG00000129757,ENSG00000063244,ENSG00000166851,ENSG00000154473,ENSG00000084207,ENSG00000101266,ENSG00000102409,ENSG00000197114,ENSG00000105298,ENSG00000167851,ENSG00000173039,ENSG00000087088,ENSG00000196588,ENSG00000110200,ENSG00000099991,ENSG00000160014,ENSG00000107077,ENSG00000113648,ENSG00000198825,ENSG00000181790,ENSG00000071051,ENSG00000163945,ENSG00000145214…
GO:0008134	transcription factor binding	molecular_function	0.0050086	0.26469	43	1033	539	19500	ENSG00000116670,ENSG00000160741,ENSG00000172534,ENSG00000165702,ENSG00000211445,ENSG00000176973,ENSG00000204435,ENSG00000071564,ENSG00000175221,ENSG00000079999,ENSG00000179583,ENSG00000068903,ENSG00000149600,ENSG00000111642,ENSG00000061273,ENSG00000170345,ENSG00000196924,ENSG00000109118,ENSG00000054356,ENSG00000087274,ENSG00000088881,ENSG00000158773,ENSG00000137270,ENSG00000148737,ENSG00000137309…
GO:0048522	positive regulation of cellular process	biological_process	0.0050201	0.26469	312	1033	5201	19500	ENSG00000167965,ENSG00000112561,ENSG00000096996,ENSG00000112799,ENSG00000120899,ENSG00000143621,ENSG00000122679,ENSG00000116670,ENSG00000120949,ENSG00000087087,ENSG00000149798,ENSG00000169242,ENSG00000160948,ENSG00000175221,ENSG00000184640,ENSG00000171467,ENSG00000123384,ENSG00000014216,ENSG00000085733,ENSG00000160789,ENSG00000028277,ENSG00000148143,ENSG00000113648,ENSG00000088325,ENSG00000108518…
GO:0005743	mitochondrial inner membrane	cellular_component	0.0050514	0.26469	38	1033	463	19500	ENSG00000130204,ENSG00000186642,ENSG00000140990,ENSG00000102125,ENSG00000171552,ENSG00000149792,ENSG00000100116,ENSG00000050426,ENSG00000215021,ENSG00000183617,ENSG00000059573,ENSG00000197912,ENSG00000161513,ENSG00000169682,ENSG00000182199,ENSG00000241837,ENSG00000130414,ENSG00000156411,ENSG00000183172,ENSG00000159445,ENSG00000126267,ENSG00000125648,ENSG00000213619,ENSG00000170906,ENSG00000095321…
GO:0042790	transcription of nuclear large rRNA transcript from RNA polymerase I promoter	biological_process	0.0050968	0.26469	4	1033	14	19500	ENSG00000158796,ENSG00000013573,ENSG00000113648,ENSG00000166986
GO:1901836	regulation of transcription of nuclear large rRNA transcript from RNA polymerase I promoter	biological_process	0.0050968	0.26469	4	1033	14	19500	ENSG00000158796,ENSG00000113648,ENSG00000013573,ENSG00000166986
GO:0044406	adhesion of symbiont to host	biological_process	0.0051106	0.26469	4	1033	14	19500	ENSG00000090339,ENSG00000073060,ENSG00000110651,ENSG00000096384
GO:0048313	Golgi inheritance	biological_process	0.0051126	0.26469	4	1033	14	19500	ENSG00000162236,ENSG00000107862,ENSG00000167110,ENSG00000102882
GO:0010522	regulation of calcium ion transport into cytosol	biological_process	0.0051174	0.26469	11	1033	85	19500	ENSG00000140464,ENSG00000130427,ENSG00000087088,ENSG00000083454,ENSG00000102879,ENSG00000127533,ENSG00000051523,ENSG00000160014,ENSG00000131504,ENSG00000120899,ENSG00000135124
GO:0036498	IRE1-mediated unfolded protein response	biological_process	0.0051191	0.26469	9	1033	62	19500	ENSG00000087274,ENSG00000087088,ENSG00000068971,ENSG00000105327,ENSG00000149428,ENSG00000013573,ENSG00000162298,ENSG00000160789,ENSG00000160691
GO:1902235	regulation of endoplasmic reticulum stress-induced intrinsic apoptotic signaling pathway	biological_process	0.0051236	0.26469	6	1033	31	19500	ENSG00000162298,ENSG00000131871,ENSG00000149428,ENSG00000178719,ENSG00000105327,ENSG00000071051
GO:0001776	leukocyte homeostasis	biological_process	0.005124	0.26469	11	1033	85	19500	ENSG00000105639,ENSG00000157514,ENSG00000163930,ENSG00000213658,ENSG00000240505,ENSG00000102879,ENSG00000166925,ENSG00000056586,ENSG00000137078,ENSG00000129465,ENSG00000087088
GO:0031399	regulation of protein modification process	biological_process	0.0051552	0.26565	124	1033	1873	19500	ENSG00000174775,ENSG00000158321,ENSG00000160211,ENSG00000145214,ENSG00000163945,ENSG00000181790,ENSG00000101109,ENSG00000198825,ENSG00000071054,ENSG00000160014,ENSG00000099991,ENSG00000169689,ENSG00000167851,ENSG00000105298,ENSG00000167110,ENSG00000154473,ENSG00000084207,ENSG00000096384,ENSG00000110931,ENSG00000104814,ENSG00000167770,ENSG00000172232,ENSG00000068001,ENSG00000114745,ENSG00000137843…
GO:1902580	single-organism cellular localization	biological_process	0.0052464	0.2697	87	1033	1250	19500	ENSG00000138757,ENSG00000171100,ENSG00000141837,ENSG00000132329,ENSG00000095321,ENSG00000135441,ENSG00000161203,ENSG00000087088,ENSG00000100242,ENSG00000005844,ENSG00000160789,ENSG00000132361,ENSG00000174871,ENSG00000162236,ENSG00000109083,ENSG00000149927,ENSG00000100023,ENSG00000167461,ENSG00000133216,ENSG00000100151,ENSG00000064419,ENSG00000197879,ENSG00000122679,ENSG00000172482,ENSG00000079999…
GO:0042826	histone deacetylase binding	molecular_function	0.0054276	0.27834	13	1033	110	19500	ENSG00000108840,ENSG00000158773,ENSG00000137270,ENSG00000096384,ENSG00000102409,ENSG00000213999,ENSG00000011243,ENSG00000196498,ENSG00000108953,ENSG00000068903,ENSG00000173039,ENSG00000111642,ENSG00000160685
GO:0006970	response to osmotic stress	biological_process	0.0054682	0.27975	10	1033	74	19500	ENSG00000172939,ENSG00000096384,ENSG00000196428,ENSG00000120899,ENSG00000157514,ENSG00000124570,ENSG00000136802,ENSG00000100300,ENSG00000087088,ENSG00000130427
GO:1902532	negative regulation of intracellular signal transduction	biological_process	0.0055051	0.28092	43	1033	542	19500	ENSG00000198825,ENSG00000141480,ENSG00000133216,ENSG00000103148,ENSG00000092871,ENSG00000165699,ENSG00000171100,ENSG00000084207,ENSG00000213619,ENSG00000137275,ENSG00000068001,ENSG00000159445,ENSG00000162298,ENSG00000138757,ENSG00000100100,ENSG00000167851,ENSG00000173039,ENSG00000178719,ENSG00000011422,ENSG00000187446,ENSG00000142405,ENSG00000138835,ENSG00000120057,ENSG00000197283,ENSG00000120875…
GO:0090407	organophosphate biosynthetic process	biological_process	0.0055176	0.28092	48	1033	620	19500	ENSG00000160014,ENSG00000106348,ENSG00000241878,ENSG00000004455,ENSG00000198825,ENSG00000008130,ENSG00000157593,ENSG00000103502,ENSG00000145214,ENSG00000149925,ENSG00000143845,ENSG00000160211,ENSG00000130717,ENSG00000076555,ENSG00000143393,ENSG00000173540,ENSG00000174915,ENSG00000165282,ENSG00000171100,ENSG00000138621,ENSG00000166548,ENSG00000164687,ENSG00000108474,ENSG00000111669,ENSG00000138031…
GO:0005681	spliceosomal complex	cellular_component	0.0055547	0.28213	19	1033	189	19500	ENSG00000125970,ENSG00000108883,ENSG00000005436,ENSG00000104852,ENSG00000067596,ENSG00000144028,ENSG00000158941,ENSG00000197976,ENSG00000162385,ENSG00000005007,ENSG00000168883,ENSG00000169976,ENSG00000106245,ENSG00000063244,ENSG00000077312,ENSG00000157349,ENSG00000105298,ENSG00000198563,ENSG00000204392
GO:0006497	protein lipidation	biological_process	0.0056083	0.28417	11	1033	86	19500	ENSG00000196998,ENSG00000108474,ENSG00000147533,ENSG00000160446,ENSG00000119227,ENSG00000168397,ENSG00000156599,ENSG00000165282,ENSG00000163812,ENSG00000007541,ENSG00000099904
GO:0005912	adherens junction	cellular_component	0.0056607	0.28615	41	1033	512	19500	ENSG00000196405,ENSG00000108518,ENSG00000214063,ENSG00000105767,ENSG00000175866,ENSG00000112655,ENSG00000181790,ENSG00000014216,ENSG00000085733,ENSG00000172354,ENSG00000149260,ENSG00000102882,ENSG00000172757,ENSG00000154330,ENSG00000079819,ENSG00000177731,ENSG00000136732,ENSG00000137309,ENSG00000087274,ENSG00000090339,ENSG00000054654,ENSG00000126458,ENSG00000157227,ENSG00000196924,ENSG00000120899…
GO:0051129	negative regulation of cellular component organization	biological_process	0.0058365	0.29433	52	1033	685	19500	ENSG00000110200,ENSG00000089820,ENSG00000204371,ENSG00000167895,ENSG00000167851,ENSG00000161203,ENSG00000154473,ENSG00000171100,ENSG00000166851,ENSG00000137309,ENSG00000167770,ENSG00000114745,ENSG00000185324,ENSG00000141480,ENSG00000133216,ENSG00000108518,ENSG00000196405,ENSG00000100151,ENSG00000165699,ENSG00000184014,ENSG00000160803,ENSG00000107077,ENSG00000113648,ENSG00000160789,ENSG00000071054…
GO:2001242	regulation of intrinsic apoptotic signaling pathway	biological_process	0.0058697	0.29531	17	1033	163	19500	ENSG00000131871,ENSG00000158941,ENSG00000105327,ENSG00000143546,ENSG00000170315,ENSG00000071051,ENSG00000011422,ENSG00000178719,ENSG00000087088,ENSG00000129465,ENSG00000130427,ENSG00000171552,ENSG00000149428,ENSG00000185825,ENSG00000185499,ENSG00000162298,ENSG00000213619
GO:0070161	anchoring junction	cellular_component	0.005957	0.29899	42	1033	529	19500	ENSG00000014216,ENSG00000181790,ENSG00000085733,ENSG00000105767,ENSG00000214063,ENSG00000112655,ENSG00000175866,ENSG00000196405,ENSG00000108518,ENSG00000177731,ENSG00000136732,ENSG00000079819,ENSG00000137309,ENSG00000154330,ENSG00000172757,ENSG00000102882,ENSG00000172354,ENSG00000149260,ENSG00000011422,ENSG00000167460,ENSG00000108262,ENSG00000187446,ENSG00000110651,ENSG00000157227,ENSG00000196924…
GO:0071706	tumor necrosis factor superfamily cytokine production	biological_process	0.0059756	0.29922	14	1033	124	19500	ENSG00000101425,ENSG00000141480,ENSG00000131871,ENSG00000159674,ENSG00000100300,ENSG00000105298,ENSG00000137275,ENSG00000172936,ENSG00000258839,ENSG00000084207,ENSG00000120949,ENSG00000181722,ENSG00000051523,ENSG00000172232
GO:0006921	cellular component disassembly involved in execution phase of apoptosis	biological_process	0.0059939	0.29942	6	1033	32	19500	ENSG00000087088,ENSG00000160570,ENSG00000189060,ENSG00000142330,ENSG00000179526,ENSG00000100813
GO:0060402	calcium ion transport into cytosol	biological_process	0.0060382	0.30093	15	1033	137	19500	ENSG00000105327,ENSG00000102879,ENSG00000127533,ENSG00000083454,ENSG00000087088,ENSG00000130427,ENSG00000140464,ENSG00000135124,ENSG00000165125,ENSG00000154118,ENSG00000120899,ENSG00000085872,ENSG00000131504,ENSG00000160014,ENSG00000051523
GO:0008047	enzyme activator activity	molecular_function	0.0060528	0.30096	41	1033	514	19500	ENSG00000105647,ENSG00000072310,ENSG00000146674,ENSG00000164050,ENSG00000142405,ENSG00000133612,ENSG00000138835,ENSG00000141258,ENSG00000197283,ENSG00000108262,ENSG00000167965,ENSG00000135924,ENSG00000130427,ENSG00000266173,ENSG00000128283,ENSG00000149798,ENSG00000100401,ENSG00000136279,ENSG00000065361,ENSG00000130052,ENSG00000120318,ENSG00000100092,ENSG00000132694,ENSG00000100721,ENSG00000133138…
GO:0060548	negative regulation of cell death	biological_process	0.0061521	0.30466	70	1033	977	19500	ENSG00000084207,ENSG00000096384,ENSG00000213619,ENSG00000148737,ENSG00000162298,ENSG00000172232,ENSG00000071205,ENSG00000198914,ENSG00000113742,ENSG00000275700,ENSG00000157514,ENSG00000071054,ENSG00000141522,ENSG00000167815,ENSG00000166925,ENSG00000197785,ENSG00000174775,ENSG00000127948,ENSG00000109854,ENSG00000125826,ENSG00000065361,ENSG00000184058,ENSG00000149428,ENSG00000108953,ENSG00000171552…
GO:0044431	Golgi apparatus part	cellular_component	0.006156	0.30466	67	1033	928	19500	ENSG00000100478,ENSG00000136279,ENSG00000185499,ENSG00000136710,ENSG00000005206,ENSG00000169241,ENSG00000160408,ENSG00000157227,ENSG00000141252,ENSG00000101294,ENSG00000131446,ENSG00000187446,ENSG00000158089,ENSG00000165861,ENSG00000165915,ENSG00000165905,ENSG00000125447,ENSG00000167889,ENSG00000142186,ENSG00000111186,ENSG00000162236,ENSG00000174871,ENSG00000197586,ENSG00000100228,ENSG00000184014…
GO:0032469	endoplasmic reticulum calcium ion homeostasis	biological_process	0.0062094	0.30632	5	1033	23	19500	ENSG00000178719,ENSG00000105327,ENSG00000087088,ENSG00000185825,ENSG00000140464
GO:0071705	nitrogen compound transport	biological_process	0.0062276	0.30632	58	1033	783	19500	ENSG00000185236,ENSG00000071054,ENSG00000198246,ENSG00000157593,ENSG00000176087,ENSG00000185339,ENSG00000162383,ENSG00000165699,ENSG00000156026,ENSG00000110801,ENSG00000100151,ENSG00000011083,ENSG00000135100,ENSG00000076555,ENSG00000187486,ENSG00000197119,ENSG00000169371,ENSG00000125648,ENSG00000063244,ENSG00000168003,ENSG00000138757,ENSG00000141837,ENSG00000157349,ENSG00000148737,ENSG00000137275…
GO:0051560	mitochondrial calcium ion homeostasis	biological_process	0.006233	0.30632	5	1033	23	19500	ENSG00000185825,ENSG00000197043,ENSG00000156026,ENSG00000107745,ENSG00000183172
GO:0015858	nucleoside transport	biological_process	0.0062538	0.30664	5	1033	23	19500	ENSG00000198246,ENSG00000137275,ENSG00000157593,ENSG00000125648,ENSG00000112759
GO:0070085	glycosylation	biological_process	0.0062921	0.30737	26	1033	290	19500	ENSG00000158089,ENSG00000117682,ENSG00000110080,ENSG00000244038,ENSG00000130175,ENSG00000131446,ENSG00000187446,ENSG00000126091,ENSG00000180549,ENSG00000119227,ENSG00000121578,ENSG00000181830,ENSG00000176383,ENSG00000160408,ENSG00000102805,ENSG00000077463,ENSG00000132329,ENSG00000068903,ENSG00000090581,ENSG00000185499,ENSG00000162298,ENSG00000114745,ENSG00000115525,ENSG00000167889,ENSG00000165905…
GO:0050790	regulation of catalytic activity	biological_process	0.0062976	0.30737	146	1033	2264	19500	ENSG00000133216,ENSG00000100721,ENSG00000092871,ENSG00000132694,ENSG00000166145,ENSG00000064601,ENSG00000071051,ENSG00000188277,ENSG00000160691,ENSG00000100767,ENSG00000114738,ENSG00000110200,ENSG00000102882,ENSG00000159788,ENSG00000073060,ENSG00000089820,ENSG00000196588,ENSG00000087088,ENSG00000172939,ENSG00000137275,ENSG00000101266,ENSG00000173327,ENSG00000180448,ENSG00000184060,ENSG00000146674…
GO:0051248	negative regulation of protein metabolic process	biological_process	0.0063284	0.30816	84	1033	1209	19500	ENSG00000166145,ENSG00000071051,ENSG00000113648,ENSG00000107077,ENSG00000100767,ENSG00000141480,ENSG00000133216,ENSG00000092871,ENSG00000165699,ENSG00000135506,ENSG00000171100,ENSG00000166851,ENSG00000197114,ENSG00000102409,ENSG00000101266,ENSG00000274897,ENSG00000129757,ENSG00000063244,ENSG00000110200,ENSG00000173039,ENSG00000196588,ENSG00000087088,ENSG00000187446,ENSG00000105639,ENSG00000146674…
GO:0044763	single-organism cellular process	biological_process	0.0063571	0.30856	747	1033	13416	19500	ENSG00000127527,ENSG00000167770,ENSG00000140961,ENSG00000121753,ENSG00000071127,ENSG00000137497,ENSG00000113742,ENSG00000148335,ENSG00000099991,ENSG00000071054,ENSG00000127511,ENSG00000141522,ENSG00000101109,ENSG00000130158,ENSG00000198246,ENSG00000158321,ENSG00000135469,ENSG00000167613,ENSG00000259431,ENSG00000100298,ENSG00000133138,ENSG00000006007,ENSG00000167792,ENSG00000160570,ENSG00000139613…
GO:0046649	lymphocyte activation	biological_process	0.0063656	0.30856	52	1033	688	19500	ENSG00000116670,ENSG00000128322,ENSG00000122641,ENSG00000071564,ENSG00000130427,ENSG00000128917,ENSG00000175505,ENSG00000204516,ENSG00000151208,ENSG00000152457,ENSG00000110651,ENSG00000015285,ENSG00000157227,ENSG00000105639,ENSG00000102034,ENSG00000096996,ENSG00000120899,ENSG00000213658,ENSG00000168918,ENSG00000102879,ENSG00000013725,ENSG00000244038,ENSG00000125347,ENSG00000186827,ENSG00000090339…
GO:0008104	protein localization	biological_process	0.0063908	0.30907	159	1033	2491	19500	ENSG00000116786,ENSG00000100023,ENSG00000213923,ENSG00000100151,ENSG00000110801,ENSG00000133216,ENSG00000174871,ENSG00000177169,ENSG00000131504,ENSG00000064601,ENSG00000161203,ENSG00000087088,ENSG00000117410,ENSG00000132329,ENSG00000171130,ENSG00000034053,ENSG00000104783,ENSG00000005844,ENSG00000102882,ENSG00000068400,ENSG00000138757,ENSG00000141837,ENSG00000157349,ENSG00000125447,ENSG00000039523…
GO:0048168	regulation of neuronal synaptic plasticity	biological_process	0.0064053	0.30907	8	1033	53	19500	ENSG00000113758,ENSG00000100321,ENSG00000197283,ENSG00000154118,ENSG00000167461,ENSG00000133216,ENSG00000165802,ENSG00000174775
GO:0042157	lipoprotein metabolic process	biological_process	0.0064368	0.30953	14	1033	125	19500	ENSG00000011009,ENSG00000147533,ENSG00000108474,ENSG00000123384,ENSG00000196998,ENSG00000099904,ENSG00000165282,ENSG00000007541,ENSG00000163812,ENSG00000168397,ENSG00000156599,ENSG00000160446,ENSG00000119227,ENSG00000128284
GO:0060401	cytosolic calcium ion transport	biological_process	0.0064529	0.30953	15	1033	138	19500	ENSG00000165125,ENSG00000135124,ENSG00000154118,ENSG00000120899,ENSG00000085872,ENSG00000131504,ENSG00000051523,ENSG00000160014,ENSG00000127533,ENSG00000105327,ENSG00000102879,ENSG00000083454,ENSG00000087088,ENSG00000130427,ENSG00000140464
GO:0044448	cell cortex part	cellular_component	0.0064726	0.30953	15	1033	138	19500	ENSG00000167460,ENSG00000136732,ENSG00000100092,ENSG00000079819,ENSG00000085733,ENSG00000071127,ENSG00000196924,ENSG00000113758,ENSG00000139437,ENSG00000185215,ENSG00000165802,ENSG00000172757,ENSG00000102879,ENSG00000184640,ENSG00000137497
GO:0031667	response to nutrient levels	biological_process	0.0064731	0.30953	50	1033	657	19500	ENSG00000070770,ENSG00000067225,ENSG00000114353,ENSG00000167965,ENSG00000148356,ENSG00000165861,ENSG00000072310,ENSG00000039523,ENSG00000090339,ENSG00000100300,ENSG00000134294,ENSG00000179364,ENSG00000051523,ENSG00000168397,ENSG00000130427,ENSG00000068903,ENSG00000160948,ENSG00000167671,ENSG00000166986,ENSG00000188186,ENSG00000032742,ENSG00000177169,ENSG00000196235,ENSG00000109083,ENSG00000126247…
GO:0030029	actin filament-based process	biological_process	0.0065516	0.31258	53	1033	705	19500	ENSG00000172757,ENSG00000100242,ENSG00000099331,ENSG00000196588,ENSG00000177731,ENSG00000079819,ENSG00000179057,ENSG00000071127,ENSG00000185324,ENSG00000113758,ENSG00000196405,ENSG00000108518,ENSG00000163995,ENSG00000100151,ENSG00000174775,ENSG00000158321,ENSG00000132694,ENSG00000165699,ENSG00000071051,ENSG00000085733,ENSG00000149925,ENSG00000188277,ENSG00000017260,ENSG00000092841,ENSG00000131504…
GO:0048167	regulation of synaptic plasticity	biological_process	0.00667	0.31624	17	1033	165	19500	ENSG00000133216,ENSG00000167461,ENSG00000166900,ENSG00000174775,ENSG00000100151,ENSG00000143740,ENSG00000197283,ENSG00000175866,ENSG00000120899,ENSG00000181790,ENSG00000154118,ENSG00000165802,ENSG00000166963,ENSG00000113758,ENSG00000100321,ENSG00000123159,ENSG00000174791
GO:0048308	organelle inheritance	biological_process	0.006683	0.31624	4	1033	15	19500	ENSG00000167110,ENSG00000102882,ENSG00000162236,ENSG00000107862
GO:0043085	positive regulation of catalytic activity	biological_process	0.0066989	0.31624	94	1033	1379	19500	ENSG00000137843,ENSG00000142733,ENSG00000105327,ENSG00000072310,ENSG00000090339,ENSG00000105647,ENSG00000110651,ENSG00000170315,ENSG00000108262,ENSG00000114353,ENSG00000127129,ENSG00000138835,ENSG00000133612,ENSG00000142405,ENSG00000128283,ENSG00000155366,ENSG00000135924,ENSG00000140464,ENSG00000034152,ENSG00000106462,ENSG00000120318,ENSG00000100246,ENSG00000175920,ENSG00000130052,ENSG00000065361…
GO:0030619	U1 snRNA binding	molecular_function	0.0067384	0.31624	3	1033	8	19500	ENSG00000077312,ENSG00000157110,ENSG00000104852
GO:0043008	ATP-dependent protein binding	molecular_function	0.0067639	0.31624	3	1033	8	19500	ENSG00000096384,ENSG00000198563,ENSG00000184381
GO:0006924	activation-induced cell death of T cells	biological_process	0.0067806	0.31624	3	1033	8	19500	ENSG00000157514,ENSG00000129465,ENSG00000166925
GO:0021814	cell motility involved in cerebral cortex radial glia guided migration	biological_process	0.0067812	0.31624	3	1033	8	19500	ENSG00000054654,ENSG00000166780,ENSG00000100242
GO:0031119	tRNA pseudouridine synthesis	biological_process	0.0067869	0.31624	3	1033	8	19500	ENSG00000156990,ENSG00000177192,ENSG00000007376
GO:0034992	microtubule organizing center attachment site	cellular_component	0.0067922	0.31624	3	1033	8	19500	ENSG00000054654,ENSG00000176438,ENSG00000100242
GO:0034993	LINC complex	cellular_component	0.0067922	0.31624	3	1033	8	19500	ENSG00000176438,ENSG00000054654,ENSG00000100242
GO:0090286	cytoskeletal anchoring at nuclear membrane	biological_process	0.0067922	0.31624	3	1033	8	19500	ENSG00000054654,ENSG00000176438,ENSG00000100242
GO:0005739	mitochondrion	cellular_component	0.0068462	0.31806	106	1033	1583	19500	ENSG00000139437,ENSG00000059573,ENSG00000067225,ENSG00000169682,ENSG00000132716,ENSG00000182134,ENSG00000241837,ENSG00000158941,ENSG00000182199,ENSG00000183172,ENSG00000156411,ENSG00000128311,ENSG00000163382,ENSG00000105701,ENSG00000133317,ENSG00000072506,ENSG00000172482,ENSG00000068903,ENSG00000100116,ENSG00000118960,ENSG00000111843,ENSG00000125871,ENSG00000177192,ENSG00000004455,ENSG00000160691…
GO:0046823	negative regulation of nucleocytoplasmic transport	biological_process	0.0069439	0.32145	7	1033	43	19500	ENSG00000186642,ENSG00000187446,ENSG00000176973,ENSG00000146232,ENSG00000079999,ENSG00000138757,ENSG00000100401
GO:0004407	histone deacetylase activity	molecular_function	0.0069496	0.32145	7	1033	43	19500	ENSG00000108840,ENSG00000111642,ENSG00000077463,ENSG00000068903,ENSG00000135365,ENSG00000061273,ENSG00000127511
GO:0045055	regulated secretory pathway	biological_process	0.0070511	0.32475	43	1033	550	19500	ENSG00000116815,ENSG00000185627,ENSG00000143621,ENSG00000100321,ENSG00000136279,ENSG00000051523,ENSG00000204435,ENSG00000196230,ENSG00000171298,ENSG00000169692,ENSG00000011422,ENSG00000213658,ENSG00000143546,ENSG00000067225,ENSG00000108639,ENSG00000244038,ENSG00000127561,ENSG00000102879,ENSG00000086730,ENSG00000170909,ENSG00000096384,ENSG00000084207,ENSG00000180448,ENSG00000172232,ENSG00000196743…
GO:0070232	regulation of T cell apoptotic process	biological_process	0.0070514	0.32475	6	1033	33	19500	ENSG00000169242,ENSG00000105327,ENSG00000166925,ENSG00000105639,ENSG00000157514,ENSG00000129465
GO:0010043	response to zinc ion	biological_process	0.0071193	0.32716	8	1033	54	19500	ENSG00000125148,ENSG00000143546,ENSG00000213145,ENSG00000135124,ENSG00000145740,ENSG00000122986,ENSG00000165915,ENSG00000100300
GO:0008565	protein transporter activity	molecular_function	0.0072227	0.3312	11	1033	89	19500	ENSG00000169180,ENSG00000132329,ENSG00000242247,ENSG00000123384,ENSG00000102898,ENSG00000122679,ENSG00000042753,ENSG00000082898,ENSG00000064419,ENSG00000130204,ENSG00000169371
GO:0008286	insulin receptor signaling pathway	biological_process	0.0074035	0.33876	14	1033	127	19500	ENSG00000143882,ENSG00000114353,ENSG00000160691,ENSG00000175866,ENSG00000124160,ENSG00000165816,ENSG00000173039,ENSG00000171130,ENSG00000165699,ENSG00000105647,ENSG00000160685,ENSG00000117410,ENSG00000072310,ENSG00000149639
GO:0003924	GTPase activity	molecular_function	0.0074683	0.34099	26	1033	294	19500	ENSG00000197562,ENSG00000126458,ENSG00000196642,ENSG00000166592,ENSG00000258947,ENSG00000167461,ENSG00000174775,ENSG00000133612,ENSG00000139890,ENSG00000114353,ENSG00000185236,ENSG00000100228,ENSG00000108883,ENSG00000148824,ENSG00000172432,ENSG00000172354,ENSG00000184640,ENSG00000155366,ENSG00000196230,ENSG00000078369,ENSG00000079805,ENSG00000132881,ENSG00000139832,ENSG00000037042,ENSG00000079974…
GO:0051015	actin filament binding	molecular_function	0.0074982	0.34162	17	1033	167	19500	ENSG00000136717,ENSG00000144488,ENSG00000172757,ENSG00000197879,ENSG00000136279,ENSG00000071127,ENSG00000179057,ENSG00000177731,ENSG00000054654,ENSG00000087274,ENSG00000100151,ENSG00000102879,ENSG00000176438,ENSG00000196924,ENSG00000149591,ENSG00000167460,ENSG00000042493
GO:1900117	regulation of execution phase of apoptosis	biological_process	0.0075281	0.34225	5	1033	24	19500	ENSG00000068903,ENSG00000171552,ENSG00000087088,ENSG00000170633,ENSG00000092871
GO:0008380	RNA splicing	biological_process	0.0076005	0.34377	35	1033	429	19500	ENSG00000154743,ENSG00000204392,ENSG00000087087,ENSG00000179335,ENSG00000168883,ENSG00000173933,ENSG00000176261,ENSG00000077312,ENSG00000197976,ENSG00000100142,ENSG00000158941,ENSG00000157110,ENSG00000162385,ENSG00000116350,ENSG00000085872,ENSG00000105323,ENSG00000011243,ENSG00000104852,ENSG00000005436,ENSG00000198563,ENSG00000142252,ENSG00000182872,ENSG00000100813,ENSG00000005075,ENSG00000169371…
GO:0007049	cell cycle	biological_process	0.0076135	0.34377	116	1033	1759	19500	ENSG00000197299,ENSG00000126216,ENSG00000204227,ENSG00000137843,ENSG00000103056,ENSG00000005007,ENSG00000070770,ENSG00000215021,ENSG00000196924,ENSG00000011243,ENSG00000114353,ENSG00000108262,ENSG00000171552,ENSG00000107862,ENSG00000140464,ENSG00000091732,ENSG00000196230,ENSG00000068028,ENSG00000155366,ENSG00000172534,ENSG00000048028,ENSG00000188486,ENSG00000136717,ENSG00000141551,ENSG00000108953…
GO:0042451	purine nucleoside biosynthetic process	biological_process	0.0076263	0.34377	12	1033	102	19500	ENSG00000102125,ENSG00000149925,ENSG00000138621,ENSG00000157593,ENSG00000004455,ENSG00000172992,ENSG00000067225,ENSG00000106348,ENSG00000106992,ENSG00000076555,ENSG00000143774,ENSG00000241837
GO:0046129	purine ribonucleoside biosynthetic process	biological_process	0.0076263	0.34377	12	1033	102	19500	ENSG00000067225,ENSG00000106348,ENSG00000004455,ENSG00000172992,ENSG00000157593,ENSG00000138621,ENSG00000149925,ENSG00000102125,ENSG00000241837,ENSG00000143774,ENSG00000076555,ENSG00000106992
GO:0006897	endocytosis	biological_process	0.0076734	0.34515	55	1033	743	19500	ENSG00000122359,ENSG00000171552,ENSG00000123384,ENSG00000149428,ENSG00000141551,ENSG00000136717,ENSG00000160948,ENSG00000173020,ENSG00000051523,ENSG00000136279,ENSG00000128322,ENSG00000197879,ENSG00000079805,ENSG00000139832,ENSG00000100092,ENSG00000122679,ENSG00000042753,ENSG00000134013,ENSG00000106976,ENSG00000105647,ENSG00000130475,ENSG00000102879,ENSG00000013725,ENSG00000184381,ENSG00000129219…
GO:0051168	nuclear export	biological_process	0.0077432	0.34756	19	1033	195	19500	ENSG00000011243,ENSG00000205323,ENSG00000116350,ENSG00000187446,ENSG00000102898,ENSG00000165699,ENSG00000162385,ENSG00000169180,ENSG00000005007,ENSG00000100401,ENSG00000063244,ENSG00000082898,ENSG00000148737,ENSG00000132507,ENSG00000157349,ENSG00000266173,ENSG00000198563,ENSG00000014164,ENSG00000108953
GO:0019900	kinase binding	molecular_function	0.0078932	0.35217	51	1033	680	19500	ENSG00000171552,ENSG00000091732,ENSG00000061273,ENSG00000266173,ENSG00000071564,ENSG00000128563,ENSG00000116670,ENSG00000214517,ENSG00000175920,ENSG00000079805,ENSG00000106976,ENSG00000034152,ENSG00000084764,ENSG00000105647,ENSG00000072310,ENSG00000196924,ENSG00000184381,ENSG00000087586,ENSG00000168522,ENSG00000120899,ENSG00000213658,ENSG00000187446,ENSG00000015285,ENSG00000173039,ENSG00000062598…
GO:0033558	protein deacetylase activity	molecular_function	0.0078954	0.35217	7	1033	44	19500	ENSG00000108840,ENSG00000111642,ENSG00000077463,ENSG00000068903,ENSG00000135365,ENSG00000127511,ENSG00000061273
GO:0030863	cortical cytoskeleton	cellular_component	0.0078957	0.35217	11	1033	90	19500	ENSG00000137497,ENSG00000165802,ENSG00000172757,ENSG00000102879,ENSG00000113758,ENSG00000196924,ENSG00000085733,ENSG00000071127,ENSG00000167460,ENSG00000136732,ENSG00000079819
GO:0003779	actin binding	molecular_function	0.0079674	0.35463	34	1033	415	19500	ENSG00000172757,ENSG00000099331,ENSG00000196588,ENSG00000177731,ENSG00000079819,ENSG00000179057,ENSG00000175130,ENSG00000071127,ENSG00000113758,ENSG00000108518,ENSG00000196405,ENSG00000163995,ENSG00000100151,ENSG00000143375,ENSG00000149591,ENSG00000149925,ENSG00000131504,ENSG00000144488,ENSG00000166963,ENSG00000136717,ENSG00000123159,ENSG00000136279,ENSG00000197879,ENSG00000102879,ENSG00000087274…
GO:0035614	snRNA stem-loop binding	molecular_function	0.0079943	0.35494	2	1033	3	19500	ENSG00000157110,ENSG00000077312
GO:0046066	dGDP metabolic process	biological_process	0.0080079	0.35494	2	1033	3	19500	ENSG00000143774,ENSG00000275074
GO:0005956	protein kinase CK2 complex	cellular_component	0.0080719	0.35533	2	1033	3	19500	ENSG00000204435,ENSG00000101266
GO:0006172	ADP biosynthetic process	biological_process	0.0080818	0.35533	2	1033	3	19500	ENSG00000004455,ENSG00000106992
GO:0004792	thiosulfate sulfurtransferase activity	molecular_function	0.00811	0.35533	2	1033	3	19500	ENSG00000128309,ENSG00000128311
GO:0021817	nucleokinesis involved in cell motility in cerebral cortex radial glia guided migration	biological_process	0.0081143	0.35533	2	1033	3	19500	ENSG00000100242,ENSG00000054654
GO:2001271	negative regulation of cysteine-type endopeptidase activity involved in execution phase of apoptosis	biological_process	0.0081153	0.35533	2	1033	3	19500	ENSG00000170633,ENSG00000092871
GO:0097629	extrinsic component of omegasome membrane	cellular_component	0.0081172	0.35533	2	1033	3	19500	ENSG00000177169,ENSG00000165861
GO:0071702	organic substance transport	biological_process	0.0082238	0.35926	166	1033	2631	19500	ENSG00000034053,ENSG00000104783,ENSG00000102882,ENSG00000198563,ENSG00000136802,ENSG00000161203,ENSG00000112759,ENSG00000117410,ENSG00000073060,ENSG00000177542,ENSG00000132329,ENSG00000171130,ENSG00000141837,ENSG00000157349,ENSG00000137275,ENSG00000125447,ENSG00000068400,ENSG00000138757,ENSG00000100151,ENSG00000110801,ENSG00000064601,ENSG00000176973,ENSG00000266173,ENSG00000163884,ENSG00000079999…
GO:0051651	maintenance of location in cell	biological_process	0.0082588	0.36005	12	1033	103	19500	ENSG00000146232,ENSG00000113758,ENSG00000196924,ENSG00000138757,ENSG00000176438,ENSG00000100242,ENSG00000079999,ENSG00000140464,ENSG00000135506,ENSG00000171298,ENSG00000100300,ENSG00000054654
GO:0043524	negative regulation of neuron apoptotic process	biological_process	0.0083505	0.36312	15	1033	142	19500	ENSG00000096384,ENSG00000141837,ENSG00000065361,ENSG00000120899,ENSG00000197283,ENSG00000149428,ENSG00000141480,ENSG00000102879,ENSG00000113742,ENSG00000174775,ENSG00000175505,ENSG00000171552,ENSG00000087088,ENSG00000164362,ENSG00000123384
GO:0031324	negative regulation of cellular metabolic process	biological_process	0.0083635	0.36312	164	1033	2597	19500	ENSG00000108953,ENSG00000061273,ENSG00000204673,ENSG00000140564,ENSG00000140464,ENSG00000128917,ENSG00000086102,ENSG00000106462,ENSG00000122641,ENSG00000071539,ENSG00000181722,ENSG00000139613,ENSG00000134283,ENSG00000111676,ENSG00000100300,ENSG00000186827,ENSG00000197299,ENSG00000135916,ENSG00000005436,ENSG00000168918,ENSG00000116350,ENSG00000187045,ENSG00000070770,ENSG00000196924,ENSG00000113742…
GO:0098796	membrane protein complex	cellular_component	0.0084328	0.36538	79	1033	1140	19500	ENSG00000185482,ENSG00000143882,ENSG00000213619,ENSG00000127527,ENSG00000162298,ENSG00000185825,ENSG00000120903,ENSG00000105341,ENSG00000078369,ENSG00000167302,ENSG00000172057,ENSG00000069424,ENSG00000160014,ENSG00000143740,ENSG00000187486,ENSG00000167614,ENSG00000167792,ENSG00000171121,ENSG00000100083,ENSG00000162517,ENSG00000106976,ENSG00000140990,ENSG00000051523,ENSG00000130204,ENSG00000139190…
GO:0017136	NAD-dependent histone deacetylase activity	molecular_function	0.0085425	0.36711	4	1033	16	19500	ENSG00000061273,ENSG00000077463,ENSG00000068903,ENSG00000108840
GO:1903008	organelle disassembly	biological_process	0.0085493	0.36711	11	1033	91	19500	ENSG00000196998,ENSG00000107862,ENSG00000100300,ENSG00000072310,ENSG00000168397,ENSG00000085733,ENSG00000167110,ENSG00000070770,ENSG00000110931,ENSG00000162236,ENSG00000126214
GO:0042158	lipoprotein biosynthetic process	biological_process	0.0085511	0.36711	11	1033	91	19500	ENSG00000119227,ENSG00000160446,ENSG00000168397,ENSG00000156599,ENSG00000007541,ENSG00000165282,ENSG00000163812,ENSG00000099904,ENSG00000196998,ENSG00000108474,ENSG00000147533
GO:0005884	actin filament	cellular_component	0.0085559	0.36711	11	1033	91	19500	ENSG00000197879,ENSG00000196924,ENSG00000071127,ENSG00000085733,ENSG00000015285,ENSG00000167460,ENSG00000165699,ENSG00000079999,ENSG00000099331,ENSG00000144488,ENSG00000102879
GO:1901363	heterocyclic compound binding	molecular_function	0.0085592	0.36711	362	1033	6165	19500	ENSG00000168101,ENSG00000108786,ENSG00000170949,ENSG00000175550,ENSG00000065361,ENSG00000184058,ENSG00000179335,ENSG00000149428,ENSG00000071564,ENSG00000004478,ENSG00000141551,ENSG00000166169,ENSG00000154743,ENSG00000155366,ENSG00000161513,ENSG00000142405,ENSG00000204351,ENSG00000114353,ENSG00000205323,ENSG00000196169,ENSG00000085872,ENSG00000132518,ENSG00000124357,ENSG00000107331,ENSG00000072310…
GO:0014069	postsynaptic density	cellular_component	0.008607	0.36842	20	1033	211	19500	ENSG00000164687,ENSG00000151208,ENSG00000165802,ENSG00000088899,ENSG00000113742,ENSG00000136279,ENSG00000079805,ENSG00000135124,ENSG00000172936,ENSG00000167461,ENSG00000141480,ENSG00000100151,ENSG00000069424,ENSG00000197283,ENSG00000120899,ENSG00000175866,ENSG00000174871,ENSG00000181790,ENSG00000179526,ENSG00000071051
GO:0042470	melanosome	cellular_component	0.0088723	0.3774	12	1033	104	19500	ENSG00000141258,ENSG00000197043,ENSG00000100321,ENSG00000168003,ENSG00000157227,ENSG00000137880,ENSG00000042493,ENSG00000155660,ENSG00000096384,ENSG00000122359,ENSG00000108953,ENSG00000166900
GO:0048770	pigment granule	cellular_component	0.0088723	0.3774	12	1033	104	19500	ENSG00000122359,ENSG00000166900,ENSG00000108953,ENSG00000168003,ENSG00000157227,ENSG00000197043,ENSG00000100321,ENSG00000141258,ENSG00000155660,ENSG00000096384,ENSG00000042493,ENSG00000137880
GO:0010559	regulation of glycoprotein biosynthetic process	biological_process	0.0088901	0.3774	7	1033	45	19500	ENSG00000187446,ENSG00000167110,ENSG00000135916,ENSG00000148737,ENSG00000105639,ENSG00000275700,ENSG00000132329
GO:0044699	single-organism process	biological_process	0.0088946	0.3774	801	1033	14507	19500	ENSG00000163520,ENSG00000181218,ENSG00000146005,ENSG00000106608,ENSG00000167797,ENSG00000158089,ENSG00000125347,ENSG00000168763,ENSG00000165125,ENSG00000182749,ENSG00000178719,ENSG00000187446,ENSG00000137496,ENSG00000101294,ENSG00000131446,ENSG00000169727,ENSG00000132952,ENSG00000156587,ENSG00000040487,ENSG00000175505,ENSG00000129657,ENSG00000135124,ENSG00000072609,ENSG00000197879,ENSG00000072163…
GO:1900034	regulation of cellular response to heat	biological_process	0.0089056	0.3774	7	1033	45	19500	ENSG00000204673,ENSG00000158941,ENSG00000108953,ENSG00000004478,ENSG00000102882,ENSG00000096384,ENSG00000167965
GO:0030031	cell projection assembly	biological_process	0.0089246	0.37745	27	1033	313	19500	ENSG00000177106,ENSG00000139437,ENSG00000032742,ENSG00000188277,ENSG00000089327,ENSG00000182957,ENSG00000085733,ENSG00000071051,ENSG00000015285,ENSG00000109083,ENSG00000090339,ENSG00000054654,ENSG00000158321,ENSG00000167614,ENSG00000174775,ENSG00000196405,ENSG00000108518,ENSG00000079805,ENSG00000187535,ENSG00000185324,ENSG00000136279,ENSG00000141933,ENSG00000167646,ENSG00000184640,ENSG00000214021…
GO:0004702	receptor signaling protein serine/threonine kinase activity	molecular_function	0.0089431	0.37748	8	1033	56	19500	ENSG00000198909,ENSG00000104814,ENSG00000173327,ENSG00000071054,ENSG00000149923,ENSG00000129465,ENSG00000142733,ENSG00000102882
GO:0048169	regulation of long-term neuronal synaptic plasticity	biological_process	0.009026	0.38022	5	1033	25	19500	ENSG00000174775,ENSG00000133216,ENSG00000167461,ENSG00000197283,ENSG00000100321
GO:0070129	regulation of mitochondrial translation	biological_process	0.0090473	0.38036	5	1033	25	19500	ENSG00000155906,ENSG00000156990,ENSG00000182199,ENSG00000182768,ENSG00000148824
GO:1903829	positive regulation of cellular protein localization	biological_process	0.0090884	0.38134	25	1033	284	19500	ENSG00000068001,ENSG00000197879,ENSG00000163930,ENSG00000185825,ENSG00000185482,ENSG00000166851,ENSG00000122679,ENSG00000096384,ENSG00000148737,ENSG00000068903,ENSG00000137497,ENSG00000123384,ENSG00000108953,ENSG00000166963,ENSG00000070770,ENSG00000102898,ENSG00000187446,ENSG00000105647,ENSG00000039523,ENSG00000187486,ENSG00000166900,ENSG00000105327,ENSG00000133216,ENSG00000174775,ENSG00000157110
GO:0006886	intracellular protein transport	biological_process	0.0091782	0.38434	66	1033	929	19500	ENSG00000095321,ENSG00000132329,ENSG00000161203,ENSG00000125447,ENSG00000138757,ENSG00000135506,ENSG00000064601,ENSG00000085733,ENSG00000160789,ENSG00000162236,ENSG00000229117,ENSG00000160948,ENSG00000176973,ENSG00000172482,ENSG00000079999,ENSG00000266173,ENSG00000122679,ENSG00000042753,ENSG00000123159,ENSG00000132507,ENSG00000100401,ENSG00000100478,ENSG00000126214,ENSG00000197879,ENSG00000064419…
GO:0031532	actin cytoskeleton reorganization	biological_process	0.0092588	0.38649	11	1033	92	19500	ENSG00000158321,ENSG00000174775,ENSG00000017260,ENSG00000196924,ENSG00000175866,ENSG00000160691,ENSG00000141522,ENSG00000120899,ENSG00000112655,ENSG00000142330,ENSG00000085733
GO:0045185	maintenance of protein location	biological_process	0.0092659	0.38649	11	1033	92	19500	ENSG00000176438,ENSG00000146232,ENSG00000196924,ENSG00000138757,ENSG00000113758,ENSG00000100242,ENSG00000135506,ENSG00000100300,ENSG00000054654,ENSG00000140464,ENSG00000079999
GO:0044429	mitochondrial part	cellular_component	0.00937	0.39007	72	1033	1029	19500	ENSG00000004455,ENSG00000160691,ENSG00000177192,ENSG00000177169,ENSG00000174886,ENSG00000006695,ENSG00000248098,ENSG00000164362,ENSG00000125445,ENSG00000156990,ENSG00000107745,ENSG00000156026,ENSG00000076555,ENSG00000136143,ENSG00000184060,ENSG00000126267,ENSG00000184470,ENSG00000170906,ENSG00000087088,ENSG00000135441,ENSG00000095321,ENSG00000177542,ENSG00000059573,ENSG00000169682,ENSG00000241837…
GO:0042308	negative regulation of protein import into nucleus	biological_process	0.009445	0.3909	6	1033	35	19500	ENSG00000187446,ENSG00000186642,ENSG00000176973,ENSG00000146232,ENSG00000079999,ENSG00000138757
GO:1904590	negative regulation of protein import	biological_process	0.009445	0.3909	6	1033	35	19500	ENSG00000176973,ENSG00000187446,ENSG00000186642,ENSG00000146232,ENSG00000079999,ENSG00000138757
GO:0030139	endocytic vesicle	cellular_component	0.0094453	0.3909	25	1033	285	19500	ENSG00000149428,ENSG00000111186,ENSG00000149798,ENSG00000122359,ENSG00000171130,ENSG00000073060,ENSG00000117410,ENSG00000123384,ENSG00000161203,ENSG00000123159,ENSG00000042753,ENSG00000068001,ENSG00000051523,ENSG00000197879,ENSG00000139832,ENSG00000079805,ENSG00000196405,ENSG00000167461,ENSG00000141480,ENSG00000102879,ENSG00000100151,ENSG00000015285,ENSG00000170315,ENSG00000198825,ENSG00000185236
GO:0000075	cell cycle checkpoint	biological_process	0.009488	0.39164	20	1033	213	19500	ENSG00000087586,ENSG00000124688,ENSG00000118655,ENSG00000158941,ENSG00000197299,ENSG00000174775,ENSG00000088038,ENSG00000185499,ENSG00000116670,ENSG00000071539,ENSG00000154473,ENSG00000072609,ENSG00000166851,ENSG00000198563,ENSG00000087088,ENSG00000171552,ENSG00000140464,ENSG00000048028,ENSG00000110200,ENSG00000188486
GO:0009991	response to extracellular stimulus	biological_process	0.0095001	0.39164	51	1033	687	19500	ENSG00000148356,ENSG00000167965,ENSG00000170345,ENSG00000114353,ENSG00000067225,ENSG00000070770,ENSG00000179364,ENSG00000134294,ENSG00000100300,ENSG00000090339,ENSG00000072310,ENSG00000039523,ENSG00000165861,ENSG00000168397,ENSG00000051523,ENSG00000188186,ENSG00000160948,ENSG00000167671,ENSG00000166986,ENSG00000068903,ENSG00000130427,ENSG00000085733,ENSG00000160803,ENSG00000126247,ENSG00000014216…
GO:0043087	regulation of GTPase activity	biological_process	0.0095929	0.3947	38	1033	482	19500	ENSG00000099331,ENSG00000242247,ENSG00000089820,ENSG00000159788,ENSG00000141968,ENSG00000174791,ENSG00000184060,ENSG00000160360,ENSG00000071205,ENSG00000180448,ENSG00000103148,ENSG00000174775,ENSG00000133138,ENSG00000141480,ENSG00000132694,ENSG00000165699,ENSG00000141522,ENSG00000188277,ENSG00000149798,ENSG00000169727,ENSG00000128283,ENSG00000114993,ENSG00000106462,ENSG00000100092,ENSG00000120318…
GO:0032471	negative regulation of endoplasmic reticulum calcium ion concentration	biological_process	0.0096853	0.39773	3	1033	9	19500	ENSG00000105327,ENSG00000185825,ENSG00000087088
GO:0060050	positive regulation of protein glycosylation	biological_process	0.0097156	0.39821	3	1033	9	19500	ENSG00000132329,ENSG00000167110,ENSG00000187446
GO:1900118	negative regulation of execution phase of apoptosis	biological_process	0.0097909	0.39983	3	1033	9	19500	ENSG00000092871,ENSG00000170633,ENSG00000171552
GO:0044802	single-organism membrane organization	biological_process	0.0097939	0.39983	74	1033	1064	19500	ENSG00000132329,ENSG00000087088,ENSG00000161203,ENSG00000005844,ENSG00000104783,ENSG00000100242,ENSG00000166851,ENSG00000141837,ENSG00000149927,ENSG00000100023,ENSG00000116786,ENSG00000133216,ENSG00000167461,ENSG00000100151,ENSG00000160789,ENSG00000162236,ENSG00000174871,ENSG00000109083,ENSG00000123384,ENSG00000229117,ENSG00000197879,ENSG00000139832,ENSG00000122679,ENSG00000197562,ENSG00000241837…
GO:0022008	neurogenesis	biological_process	0.0098116	0.39983	102	1033	1535	19500	ENSG00000071054,ENSG00000198825,ENSG00000175866,ENSG00000141522,ENSG00000108840,ENSG00000181790,ENSG00000158321,ENSG00000213171,ENSG00000149571,ENSG00000114745,ENSG00000172232,ENSG00000113758,ENSG00000137270,ENSG00000084207,ENSG00000096384,ENSG00000100139,ENSG00000071127,ENSG00000158555,ENSG00000159674,ENSG00000088899,ENSG00000102225,ENSG00000196576,ENSG00000120049,ENSG00000196924,ENSG00000182768…
GO:2001244	positive regulation of intrinsic apoptotic signaling pathway	biological_process	0.0098441	0.39993	8	1033	57	19500	ENSG00000087088,ENSG00000171552,ENSG00000129465,ENSG00000105327,ENSG00000185825,ENSG00000143546,ENSG00000170315,ENSG00000071051
GO:0032268	regulation of cellular protein metabolic process	biological_process	0.0098565	0.39993	164	1033	2609	19500	ENSG00000169689,ENSG00000114745,ENSG00000068001,ENSG00000172232,ENSG00000154473,ENSG00000084207,ENSG00000167110,ENSG00000088038,ENSG00000160014,ENSG00000181790,ENSG00000176087,ENSG00000148824,ENSG00000163945,ENSG00000184058,ENSG00000204435,ENSG00000128563,ENSG00000166963,ENSG00000136717,ENSG00000141551,ENSG00000155906,ENSG00000214517,ENSG00000173933,ENSG00000175920,ENSG00000065361,ENSG00000034152…
GO:0006887	exocytosis	biological_process	0.0098707	0.39993	63	1033	883	19500	ENSG00000165125,ENSG00000169692,ENSG00000187446,ENSG00000011422,ENSG00000213658,ENSG00000114353,ENSG00000143546,ENSG00000196924,ENSG00000184381,ENSG00000067225,ENSG00000103056,ENSG00000244038,ENSG00000108639,ENSG00000127561,ENSG00000102879,ENSG00000166900,ENSG00000086730,ENSG00000170909,ENSG00000116815,ENSG00000185627,ENSG00000143621,ENSG00000100321,ENSG00000185215,ENSG00000136279,ENSG00000051523…
GO:0019213	deacetylase activity	molecular_function	0.0099236	0.40131	8	1033	57	19500	ENSG00000111642,ENSG00000077463,ENSG00000068903,ENSG00000108474,ENSG00000135365,ENSG00000061273,ENSG00000127511,ENSG00000108840
GO:0007266	Rho protein signal transduction	biological_process	0.010025	0.40446	18	1033	186	19500	ENSG00000141968,ENSG00000120318,ENSG00000089820,ENSG00000053524,ENSG00000114993,ENSG00000127533,ENSG00000149798,ENSG00000172757,ENSG00000128283,ENSG00000099331,ENSG00000182957,ENSG00000188277,ENSG00000141522,ENSG00000177106,ENSG00000015285,ENSG00000132694,ENSG00000039523,ENSG00000137843
GO:0031323	regulation of cellular metabolic process	biological_process	0.010056	0.40446	364	1033	6218	19500	ENSG00000170801,ENSG00000107077,ENSG00000109083,ENSG00000136305,ENSG00000185527,ENSG00000156990,ENSG00000080603,ENSG00000076555,ENSG00000167461,ENSG00000141480,ENSG00000274897,ENSG00000129757,ENSG00000088881,ENSG00000123064,ENSG00000178752,ENSG00000105708,ENSG00000085185,ENSG00000204371,ENSG00000187778,ENSG00000135299,ENSG00000215421,ENSG00000105323,ENSG00000187446,ENSG00000172888,ENSG00000125347…
GO:0031519	PcG protein complex	cellular_component	0.010059	0.40446	7	1033	46	19500	ENSG00000113648,ENSG00000070770,ENSG00000204227,ENSG00000163930,ENSG00000106462,ENSG00000101266,ENSG00000204435
GO:2001237	negative regulation of extrinsic apoptotic signaling pathway	biological_process	0.010296	0.41322	12	1033	106	19500	ENSG00000084207,ENSG00000085733,ENSG00000148737,ENSG00000137275,ENSG00000160789,ENSG00000170633,ENSG00000092871,ENSG00000173039,ENSG00000171552,ENSG00000164362,ENSG00000091732,ENSG00000090339
GO:0044430	cytoskeletal part	cellular_component	0.01035	0.4146	103	1033	1555	19500	ENSG00000136279,ENSG00000100401,ENSG00000116670,ENSG00000126214,ENSG00000197879,ENSG00000141506,ENSG00000084764,ENSG00000005206,ENSG00000079999,ENSG00000068903,ENSG00000122359,ENSG00000156050,ENSG00000184640,ENSG00000167671,ENSG00000139437,ENSG00000168522,ENSG00000087586,ENSG00000042493,ENSG00000142945,ENSG00000087274,ENSG00000167797,ENSG00000131871,ENSG00000102879,ENSG00000137171,ENSG00000154330…
GO:0070242	thymocyte apoptotic process	biological_process	0.010652	0.42508	4	1033	17	19500	ENSG00000087088,ENSG00000105639,ENSG00000169242,ENSG00000105327
GO:0006779	porphyrin-containing compound biosynthetic process	biological_process	0.010667	0.42508	5	1033	26	19500	ENSG00000100300,ENSG00000006695,ENSG00000135100,ENSG00000136143,ENSG00000111843
GO:0030507	spectrin binding	molecular_function	0.010697	0.42508	5	1033	26	19500	ENSG00000054356,ENSG00000185527,ENSG00000079819,ENSG00000078369,ENSG00000087274
GO:0034979	NAD-dependent protein deacetylase activity	molecular_function	0.01071	0.42508	4	1033	17	19500	ENSG00000077463,ENSG00000068903,ENSG00000061273,ENSG00000108840
GO:0003951	NAD+ kinase activity	molecular_function	0.010712	0.42508	4	1033	17	19500	ENSG00000149091,ENSG00000145214,ENSG00000008130,ENSG00000176170
GO:0044433	cytoplasmic vesicle part	cellular_component	0.010867	0.43018	74	1033	1069	19500	ENSG00000099904,ENSG00000011422,ENSG00000170315,ENSG00000169692,ENSG00000072310,ENSG00000054356,ENSG00000244038,ENSG00000108639,ENSG00000051523,ENSG00000100321,ENSG00000079805,ENSG00000162517,ENSG00000171552,ENSG00000139190,ENSG00000196230,ENSG00000149428,ENSG00000204435,ENSG00000172057,ENSG00000160014,ENSG00000143740,ENSG00000069424,ENSG00000185236,ENSG00000172432,ENSG00000145740,ENSG00000167302…
GO:0008021	synaptic vesicle	cellular_component	0.010944	0.43018	16	1033	160	19500	ENSG00000197562,ENSG00000149927,ENSG00000166900,ENSG00000167461,ENSG00000127561,ENSG00000108639,ENSG00000160014,ENSG00000143740,ENSG00000185236,ENSG00000139190,ENSG00000171552,ENSG00000102225,ENSG00000034053,ENSG00000100321,ENSG00000123159,ENSG00000106976
GO:0001836	release of cytochrome c from mitochondria	biological_process	0.010949	0.43018	8	1033	58	19500	ENSG00000136305,ENSG00000011422,ENSG00000184381,ENSG00000160789,ENSG00000105327,ENSG00000141480,ENSG00000171552,ENSG00000087088
GO:0070059	intrinsic apoptotic signaling pathway in response to endoplasmic reticulum stress	biological_process	0.01097	0.43018	8	1033	58	19500	ENSG00000071051,ENSG00000178719,ENSG00000162298,ENSG00000149428,ENSG00000105327,ENSG00000087088,ENSG00000131871,ENSG00000140464
GO:0010803	regulation of tumor necrosis factor-mediated signaling pathway	biological_process	0.010973	0.43018	8	1033	58	19500	ENSG00000163349,ENSG00000179526,ENSG00000084207,ENSG00000137275,ENSG00000125826,ENSG00000005206,ENSG00000176170,ENSG00000092871
GO:0032879	regulation of localization	biological_process	0.011041	0.43018	165	1033	2635	19500	ENSG00000185236,ENSG00000160014,ENSG00000069424,ENSG00000108840,ENSG00000145740,ENSG00000181790,ENSG00000132881,ENSG00000125648,ENSG00000172232,ENSG00000068001,ENSG00000185482,ENSG00000084207,ENSG00000133246,ENSG00000114353,ENSG00000085872,ENSG00000142405,ENSG00000184381,ENSG00000015285,ENSG00000154118,ENSG00000102898,ENSG00000072310,ENSG00000107331,ENSG00000105647,ENSG00000065361,ENSG00000163930…
GO:2000377	regulation of reactive oxygen species metabolic process	biological_process	0.011053	0.43018	17	1033	174	19500	ENSG00000090339,ENSG00000131871,ENSG00000100300,ENSG00000160211,ENSG00000120899,ENSG00000114353,ENSG00000275700,ENSG00000181790,ENSG00000129465,ENSG00000068903,ENSG00000079805,ENSG00000051523,ENSG00000127528,ENSG00000135124,ENSG00000137275,ENSG00000096384,ENSG00000084207
GO:0080134	regulation of response to stress	biological_process	0.011054	0.43018	102	1033	1542	19500	ENSG00000013725,ENSG00000125347,ENSG00000158941,ENSG00000131871,ENSG00000160685,ENSG00000167965,ENSG00000178719,ENSG00000148356,ENSG00000143546,ENSG00000096996,ENSG00000120899,ENSG00000188186,ENSG00000130427,ENSG00000068903,ENSG00000204516,ENSG00000042753,ENSG00000129657,ENSG00000136279,ENSG00000185499,ENSG00000116670,ENSG00000198909,ENSG00000141480,ENSG00000165699,ENSG00000164362,ENSG00000135506…
GO:0047485	protein N-terminus binding	molecular_function	0.01106	0.43018	12	1033	107	19500	ENSG00000120049,ENSG00000215021,ENSG00000070770,ENSG00000160014,ENSG00000162236,ENSG00000132507,ENSG00000101266,ENSG00000165699,ENSG00000173039,ENSG00000164362,ENSG00000127561,ENSG00000196498
GO:0032182	ubiquitin-like protein binding	molecular_function	0.011075	0.43018	13	1033	120	19500	ENSG00000135924,ENSG00000068903,ENSG00000140464,ENSG00000160948,ENSG00000132952,ENSG00000156587,ENSG00000133612,ENSG00000167770,ENSG00000158062,ENSG00000160803,ENSG00000125826,ENSG00000154473,ENSG00000179526
GO:0018107	peptidyl-threonine phosphorylation	biological_process	0.011079	0.43018	13	1033	120	19500	ENSG00000204435,ENSG00000068903,ENSG00000176170,ENSG00000166851,ENSG00000101266,ENSG00000172939,ENSG00000145214,ENSG00000160014,ENSG00000185324,ENSG00000173020,ENSG00000172232,ENSG00000110931,ENSG00000177169
GO:0007165	signal transduction	biological_process	0.011083	0.43018	351	1033	5989	19500	ENSG00000204435,ENSG00000128283,ENSG00000091732,ENSG00000107862,ENSG00000034152,ENSG00000186642,ENSG00000120318,ENSG00000078699,ENSG00000013573,ENSG00000142733,ENSG00000137843,ENSG00000054356,ENSG00000204264,ENSG00000105647,ENSG00000111361,ENSG00000124313,ENSG00000015285,ENSG00000169692,ENSG00000177106,ENSG00000184381,ENSG00000056586,ENSG00000133246,ENSG00000158555,ENSG00000062598,ENSG00000165821…
GO:0006487	protein N-linked glycosylation	biological_process	0.011197	0.43362	10	1033	82	19500	ENSG00000162298,ENSG00000090581,ENSG00000130175,ENSG00000115525,ENSG00000114745,ENSG00000167889,ENSG00000126091,ENSG00000160408,ENSG00000110080,ENSG00000244038
GO:0010959	regulation of metal ion transport	biological_process	0.011213	0.43362	30	1033	364	19500	ENSG00000130427,ENSG00000140464,ENSG00000087088,ENSG00000127533,ENSG00000136717,ENSG00000108953,ENSG00000051523,ENSG00000079805,ENSG00000185482,ENSG00000172939,ENSG00000135124,ENSG00000166592,ENSG00000090339,ENSG00000083454,ENSG00000052344,ENSG00000100300,ENSG00000141480,ENSG00000102879,ENSG00000196924,ENSG00000131504,ENSG00000139890,ENSG00000120049,ENSG00000184381,ENSG00000160014,ENSG00000089327…
GO:0004674	protein serine/threonine kinase activity	molecular_function	0.011254	0.43424	36	1033	456	19500	ENSG00000166851,ENSG00000172939,ENSG00000137275,ENSG00000101266,ENSG00000173327,ENSG00000185324,ENSG00000110931,ENSG00000104814,ENSG00000140474,ENSG00000114738,ENSG00000102882,ENSG00000102225,ENSG00000117266,ENSG00000129465,ENSG00000073331,ENSG00000101109,ENSG00000071054,ENSG00000102893,ENSG00000177169,ENSG00000059758,ENSG00000213923,ENSG00000163349,ENSG00000034152,ENSG00000173020,ENSG00000198055…
GO:0008347	glial cell migration	biological_process	0.011272	0.43424	7	1033	47	19500	ENSG00000054654,ENSG00000100300,ENSG00000157227,ENSG00000172232,ENSG00000135124,ENSG00000100242,ENSG00000166780
GO:0043113	receptor clustering	biological_process	0.01129	0.43424	7	1033	47	19500	ENSG00000196924,ENSG00000197283,ENSG00000168522,ENSG00000139626,ENSG00000005844,ENSG00000100151,ENSG00000141837
GO:0033036	macromolecule localization	biological_process	0.011335	0.4351	179	1033	2884	19500	ENSG00000186642,ENSG00000130204,ENSG00000100321,ENSG00000163930,ENSG00000090581,ENSG00000004478,ENSG00000141551,ENSG00000166963,ENSG00000151208,ENSG00000107862,ENSG00000170315,ENSG00000128284,ENSG00000102898,ENSG00000205323,ENSG00000142405,ENSG00000184381,ENSG00000215021,ENSG00000054356,ENSG00000005007,ENSG00000072310,ENSG00000107331,ENSG00000105647,ENSG00000143882,ENSG00000185482,ENSG00000132881…
GO:0097159	organic cyclic compound binding	molecular_function	0.011353	0.4351	365	1033	6249	19500	ENSG00000181722,ENSG00000079805,ENSG00000163349,ENSG00000162517,ENSG00000166938,ENSG00000115761,ENSG00000166986,ENSG00000070770,ENSG00000196924,ENSG00000074370,ENSG00000011243,ENSG00000047230,ENSG00000197043,ENSG00000167395,ENSG00000143578,ENSG00000170345,ENSG00000129071,ENSG00000135916,ENSG00000100142,ENSG00000197299,ENSG00000100300,ENSG00000126458,ENSG00000168003,ENSG00000185024,ENSG00000110931…
GO:0032870	cellular response to hormone stimulus	biological_process	0.011594	0.44351	42	1033	551	19500	ENSG00000165699,ENSG00000149639,ENSG00000167461,ENSG00000124160,ENSG00000127948,ENSG00000160691,ENSG00000175866,ENSG00000108840,ENSG00000185340,ENSG00000171130,ENSG00000173039,ENSG00000078369,ENSG00000117410,ENSG00000130522,ENSG00000172209,ENSG00000138031,ENSG00000165802,ENSG00000084207,ENSG00000125952,ENSG00000158773,ENSG00000143882,ENSG00000105647,ENSG00000090339,ENSG00000072310,ENSG00000131871…
GO:0006643	membrane lipid metabolic process	biological_process	0.011638	0.44439	19	1033	203	19500	ENSG00000110080,ENSG00000103056,ENSG00000180549,ENSG00000103066,ENSG00000064601,ENSG00000136699,ENSG00000121578,ENSG00000119227,ENSG00000184381,ENSG00000172057,ENSG00000007541,ENSG00000066322,ENSG00000196743,ENSG00000160408,ENSG00000087088,ENSG00000176170,ENSG00000108474,ENSG00000115525,ENSG00000165282
GO:0002252	immune effector process	biological_process	0.011675	0.44501	84	1033	1240	19500	ENSG00000184381,ENSG00000168918,ENSG00000011422,ENSG00000015285,ENSG00000169692,ENSG00000110651,ENSG00000186827,ENSG00000105647,ENSG00000090339,ENSG00000244038,ENSG00000051523,ENSG00000100321,ENSG00000140464,ENSG00000107862,ENSG00000196230,ENSG00000204435,ENSG00000069424,ENSG00000172057,ENSG00000175866,ENSG00000149925,ENSG00000167613,ENSG00000147533,ENSG00000100298,ENSG00000124570,ENSG00000101425…
GO:0019222	regulation of metabolic process	biological_process	0.011774	0.44797	417	1033	7214	19500	ENSG00000266173,ENSG00000114993,ENSG00000068903,ENSG00000130427,ENSG00000198715,ENSG00000188186,ENSG00000198909,ENSG00000100207,ENSG00000135899,ENSG00000141506,ENSG00000123159,ENSG00000167548,ENSG00000011485,ENSG00000117385,ENSG00000131871,ENSG00000165861,ENSG00000196275,ENSG00000163344,ENSG00000146674,ENSG00000130165,ENSG00000213658,ENSG00000197283,ENSG00000196428,ENSG00000006194,ENSG00000157227…
GO:0044325	ion channel binding	molecular_function	0.011798	0.4481	13	1033	121	19500	ENSG00000179364,ENSG00000187486,ENSG00000108953,ENSG00000100300,ENSG00000161203,ENSG00000178719,ENSG00000096384,ENSG00000160014,ENSG00000130175,ENSG00000196924,ENSG00000131504,ENSG00000120049,ENSG00000085872
GO:0009116	nucleoside metabolic process	biological_process	0.012032	0.45547	33	1033	412	19500	ENSG00000106348,ENSG00000004455,ENSG00000008130,ENSG00000157593,ENSG00000149925,ENSG00000006695,ENSG00000130717,ENSG00000076555,ENSG00000100298,ENSG00000108515,ENSG00000167792,ENSG00000275074,ENSG00000125648,ENSG00000170906,ENSG00000213619,ENSG00000138621,ENSG00000166548,ENSG00000077463,ENSG00000111669,ENSG00000047230,ENSG00000067225,ENSG00000125458,ENSG00000241837,ENSG00000182199,ENSG00000130414…
GO:0030234	enzyme regulator activity	molecular_function	0.012045	0.45547	71	1033	1024	19500	ENSG00000196588,ENSG00000159788,ENSG00000089820,ENSG00000099331,ENSG00000213654,ENSG00000184060,ENSG00000180448,ENSG00000129757,ENSG00000165699,ENSG00000132694,ENSG00000108518,ENSG00000100721,ENSG00000068971,ENSG00000100767,ENSG00000188277,ENSG00000113648,ENSG00000064601,ENSG00000185527,ENSG00000166145,ENSG00000114993,ENSG00000266173,ENSG00000130427,ENSG00000169727,ENSG00000149798,ENSG00000136279…
GO:0019901	protein kinase binding	molecular_function	0.012057	0.45547	45	1033	600	19500	ENSG00000072310,ENSG00000105647,ENSG00000015285,ENSG00000120899,ENSG00000168522,ENSG00000087586,ENSG00000213658,ENSG00000184381,ENSG00000128563,ENSG00000071564,ENSG00000091732,ENSG00000061273,ENSG00000171552,ENSG00000084764,ENSG00000106976,ENSG00000034152,ENSG00000175920,ENSG00000079805,ENSG00000116670,ENSG00000214517,ENSG00000100151,ENSG00000092871,ENSG00000100721,ENSG00000167461,ENSG00000141480…
GO:0031623	receptor internalization	biological_process	0.012102	0.45638	10	1033	83	19500	ENSG00000110651,ENSG00000106976,ENSG00000122679,ENSG00000079805,ENSG00000173020,ENSG00000100151,ENSG00000141480,ENSG00000123384,ENSG00000161203,ENSG00000132329
GO:0051345	positive regulation of hydrolase activity	biological_process	0.012196	0.45909	53	1033	729	19500	ENSG00000141522,ENSG00000160014,ENSG00000188277,ENSG00000136305,ENSG00000132694,ENSG00000165699,ENSG00000133138,ENSG00000103148,ENSG00000174775,ENSG00000108518,ENSG00000185825,ENSG00000184060,ENSG00000071205,ENSG00000180448,ENSG00000137275,ENSG00000174791,ENSG00000141968,ENSG00000096384,ENSG00000087088,ENSG00000242247,ENSG00000167851,ENSG00000129465,ENSG00000159788,ENSG00000089820,ENSG00000099331…
GO:0098655	cation transmembrane transport	biological_process	0.012245	0.46012	52	1033	713	19500	ENSG00000125648,ENSG00000126267,ENSG00000143570,ENSG00000168003,ENSG00000141837,ENSG00000172939,ENSG00000185482,ENSG00000143882,ENSG00000117410,ENSG00000171130,ENSG00000177542,ENSG00000135740,ENSG00000104783,ENSG00000160014,ENSG00000017260,ENSG00000069424,ENSG00000006695,ENSG00000184014,ENSG00000145740,ENSG00000166592,ENSG00000173826,ENSG00000122986,ENSG00000156026,ENSG00000171121,ENSG00000107745…
GO:2000008	regulation of protein localization to cell surface	biological_process	0.012362	0.4614	6	1033	37	19500	ENSG00000096384,ENSG00000166900,ENSG00000166963,ENSG00000107862,ENSG00000069424,ENSG00000185236
GO:0033157	regulation of intracellular protein transport	biological_process	0.012368	0.4614	23	1033	262	19500	ENSG00000148737,ENSG00000082898,ENSG00000096384,ENSG00000186642,ENSG00000197879,ENSG00000185825,ENSG00000163930,ENSG00000068001,ENSG00000138757,ENSG00000100401,ENSG00000108953,ENSG00000176973,ENSG00000079999,ENSG00000102898,ENSG00000187446,ENSG00000146232,ENSG00000070770,ENSG00000157110,ENSG00000174775,ENSG00000135506,ENSG00000072310,ENSG00000039523,ENSG00000105647
GO:0009395	phospholipid catabolic process	biological_process	0.012383	0.4614	6	1033	37	19500	ENSG00000006007,ENSG00000103056,ENSG00000136699,ENSG00000103066,ENSG00000198825,ENSG00000073060
GO:0001221	transcription cofactor binding	molecular_function	0.012383	0.4614	6	1033	37	19500	ENSG00000135100,ENSG00000109118,ENSG00000176973,ENSG00000131196,ENSG00000164362,ENSG00000175866
GO:0051924	regulation of calcium ion transport	biological_process	0.012388	0.4614	21	1033	233	19500	ENSG00000135124,ENSG00000185482,ENSG00000051523,ENSG00000108953,ENSG00000127533,ENSG00000087088,ENSG00000140464,ENSG00000130427,ENSG00000154118,ENSG00000114353,ENSG00000120899,ENSG00000160014,ENSG00000184381,ENSG00000131504,ENSG00000139890,ENSG00000141480,ENSG00000102879,ENSG00000100300,ENSG00000090339,ENSG00000166592,ENSG00000083454
GO:0034641	cellular nitrogen compound metabolic process	biological_process	0.012532	0.46595	386	1033	6647	19500	ENSG00000197586,ENSG00000124444,ENSG00000113648,ENSG00000148143,ENSG00000028277,ENSG00000164308,ENSG00000108883,ENSG00000164362,ENSG00000140332,ENSG00000165699,ENSG00000125445,ENSG00000068971,ENSG00000108518,ENSG00000063244,ENSG00000106245,ENSG00000170906,ENSG00000197114,ENSG00000142186,ENSG00000127528,ENSG00000166851,ENSG00000132819,ENSG00000102901,ENSG00000095321,ENSG00000159479,ENSG00000129465…
GO:1900027	regulation of ruffle assembly	biological_process	0.012556	0.46603	5	1033	27	19500	ENSG00000174775,ENSG00000196405,ENSG00000108518,ENSG00000090339,ENSG00000177106
GO:0019706	protein-cysteine S-palmitoyltransferase activity	molecular_function	0.012604	0.4662	5	1033	27	19500	ENSG00000099904,ENSG00000147533,ENSG00000163812,ENSG00000156599,ENSG00000160446
GO:0019707	protein-cysteine S-acyltransferase activity	molecular_function	0.012604	0.4662	5	1033	27	19500	ENSG00000156599,ENSG00000160446,ENSG00000147533,ENSG00000099904,ENSG00000163812
GO:0007154	cell communication	biological_process	0.012691	0.46861	386	1033	6648	19500	ENSG00000184381,ENSG00000177106,ENSG00000154118,ENSG00000124313,ENSG00000111361,ENSG00000015285,ENSG00000169692,ENSG00000204264,ENSG00000105647,ENSG00000142733,ENSG00000137843,ENSG00000054356,ENSG00000013573,ENSG00000078699,ENSG00000186642,ENSG00000120318,ENSG00000034152,ENSG00000107862,ENSG00000091732,ENSG00000128283,ENSG00000204435,ENSG00000166963,ENSG00000143740,ENSG00000160014,ENSG00000102908…
GO:0007093	mitotic cell cycle checkpoint	biological_process	0.012876	0.47255	16	1033	163	19500	ENSG00000124688,ENSG00000087586,ENSG00000174775,ENSG00000088038,ENSG00000197299,ENSG00000118655,ENSG00000072609,ENSG00000154473,ENSG00000166851,ENSG00000116670,ENSG00000185499,ENSG00000071539,ENSG00000110200,ENSG00000171552,ENSG00000140464,ENSG00000087088
GO:1901576	organic substance biosynthetic process	biological_process	0.012918	0.47255	366	1033	6281	19500	ENSG00000143621,ENSG00000133250,ENSG00000116670,ENSG00000120949,ENSG00000020256,ENSG00000163382,ENSG00000196418,ENSG00000087087,ENSG00000169242,ENSG00000175221,ENSG00000160408,ENSG00000149600,ENSG00000171467,ENSG00000112561,ENSG00000108107,ENSG00000120057,ENSG00000120899,ENSG00000007237,ENSG00000106992,ENSG00000089335,ENSG00000120820,ENSG00000241837,ENSG00000188779,ENSG00000116580,ENSG00000166851…
GO:0002263	cell activation involved in immune response	biological_process	0.012919	0.47255	51	1033	699	19500	ENSG00000133246,ENSG00000164687,ENSG00000167851,ENSG00000056586,ENSG00000005844,ENSG00000196743,ENSG00000172232,ENSG00000180448,ENSG00000084207,ENSG00000096384,ENSG00000122986,ENSG00000167613,ENSG00000165699,ENSG00000147533,ENSG00000101425,ENSG00000124570,ENSG00000106348,ENSG00000069424,ENSG00000172057,ENSG00000131504,ENSG00000064601,ENSG00000149925,ENSG00000106244,ENSG00000014216,ENSG00000171298…
GO:0030426	growth cone	cellular_component	0.012926	0.47255	16	1033	163	19500	ENSG00000085733,ENSG00000160991,ENSG00000120899,ENSG00000160014,ENSG00000166900,ENSG00000158321,ENSG00000165699,ENSG00000096384,ENSG00000079805,ENSG00000126214,ENSG00000113758,ENSG00000113742,ENSG00000004478,ENSG00000068903,ENSG00000089820,ENSG00000158555
GO:0007033	vacuole organization	biological_process	0.012926	0.47255	16	1033	163	19500	ENSG00000171298,ENSG00000204371,ENSG00000102805,ENSG00000136710,ENSG00000171100,ENSG00000168397,ENSG00000139832,ENSG00000103148,ENSG00000102879,ENSG00000179364,ENSG00000160803,ENSG00000148356,ENSG00000109083,ENSG00000032742,ENSG00000177169,ENSG00000112561
GO:0032403	protein complex binding	molecular_function	0.012932	0.47255	61	1033	862	19500	ENSG00000108622,ENSG00000177731,ENSG00000166851,ENSG00000179057,ENSG00000171100,ENSG00000096384,ENSG00000071127,ENSG00000167110,ENSG00000205531,ENSG00000185340,ENSG00000137497,ENSG00000168071,ENSG00000172757,ENSG00000100242,ENSG00000149499,ENSG00000099991,ENSG00000099331,ENSG00000214063,ENSG00000113648,ENSG00000160691,ENSG00000149591,ENSG00000163945,ENSG00000129680,ENSG00000100151,ENSG00000136279…
GO:0030659	cytoplasmic vesicle membrane	cellular_component	0.012963	0.47287	50	1033	683	19500	ENSG00000072310,ENSG00000197562,ENSG00000244038,ENSG00000054356,ENSG00000108639,ENSG00000166900,ENSG00000102879,ENSG00000101294,ENSG00000099904,ENSG00000169692,ENSG00000170315,ENSG00000011422,ENSG00000171298,ENSG00000123384,ENSG00000005206,ENSG00000139190,ENSG00000197879,ENSG00000079805,ENSG00000139832,ENSG00000100321,ENSG00000051523,ENSG00000136279,ENSG00000162517,ENSG00000116815,ENSG00000042753…
GO:0006901	vesicle coating	biological_process	0.013108	0.47537	10	1033	84	19500	ENSG00000141551,ENSG00000130475,ENSG00000107862,ENSG00000167110,ENSG00000162517,ENSG00000054116,ENSG00000042753,ENSG00000162236,ENSG00000174871,ENSG00000114745
GO:0008625	extrinsic apoptotic signaling pathway via death domain receptors	biological_process	0.013133	0.47537	10	1033	84	19500	ENSG00000160570,ENSG00000092871,ENSG00000170633,ENSG00000090339,ENSG00000087088,ENSG00000171552,ENSG00000167895,ENSG00000137275,ENSG00000101109,ENSG00000158796
GO:0048156	tau protein binding	molecular_function	0.013141	0.47537	4	1033	18	19500	ENSG00000004478,ENSG00000136717,ENSG00000096384,ENSG00000275700
GO:0033866	nucleoside bisphosphate biosynthetic process	biological_process	0.013166	0.47537	4	1033	18	19500	ENSG00000172992,ENSG00000138621,ENSG00000076555,ENSG00000157593
GO:0034030	ribonucleoside bisphosphate biosynthetic process	biological_process	0.013166	0.47537	4	1033	18	19500	ENSG00000172992,ENSG00000138621,ENSG00000157593,ENSG00000076555
GO:0034033	purine nucleoside bisphosphate biosynthetic process	biological_process	0.013166	0.47537	4	1033	18	19500	ENSG00000076555,ENSG00000157593,ENSG00000138621,ENSG00000172992
GO:0070233	negative regulation of T cell apoptotic process	biological_process	0.013199	0.47577	4	1033	18	19500	ENSG00000166925,ENSG00000169242,ENSG00000157514,ENSG00000105639
GO:0070513	death domain binding	molecular_function	0.013341	0.47663	3	1033	10	19500	ENSG00000137275,ENSG00000087088,ENSG00000171552
GO:0010940	positive regulation of necrotic cell death	biological_process	0.01336	0.47663	3	1033	10	19500	ENSG00000100300,ENSG00000129465,ENSG00000137275
GO:2000628	regulation of miRNA metabolic process	biological_process	0.013381	0.47663	3	1033	10	19500	ENSG00000173039,ENSG00000056586,ENSG00000174775
GO:0045335	phagocytic vesicle	cellular_component	0.013408	0.47663	13	1033	123	19500	ENSG00000196405,ENSG00000167461,ENSG00000149798,ENSG00000102879,ENSG00000117410,ENSG00000171130,ENSG00000122359,ENSG00000015285,ENSG00000139832,ENSG00000197879,ENSG00000185236,ENSG00000079805,ENSG00000051523
GO:0051561	positive regulation of mitochondrial calcium ion concentration	biological_process	0.013416	0.47663	3	1033	10	19500	ENSG00000156026,ENSG00000107745,ENSG00000185825
GO:0005522	profilin binding	molecular_function	0.013427	0.47663	3	1033	10	19500	ENSG00000085733,ENSG00000196405,ENSG00000113758
GO:0019062	virion attachment to host cell	biological_process	0.013433	0.47663	3	1033	10	19500	ENSG00000090339,ENSG00000096384,ENSG00000110651
GO:0003680	AT DNA binding	molecular_function	0.013438	0.47663	3	1033	10	19500	ENSG00000213145,ENSG00000189060,ENSG00000137309
GO:0046651	lymphocyte proliferation	biological_process	0.013449	0.47663	23	1033	264	19500	ENSG00000172936,ENSG00000129465,ENSG00000175505,ENSG00000167851,ENSG00000130427,ENSG00000151208,ENSG00000087088,ENSG00000168071,ENSG00000056586,ENSG00000240505,ENSG00000096996,ENSG00000106348,ENSG00000102034,ENSG00000105639,ENSG00000168918,ENSG00000071051,ENSG00000110651,ENSG00000186827,ENSG00000125347,ENSG00000160685,ENSG00000026950,ENSG00000102879,ENSG00000013725
GO:0043393	regulation of protein binding	biological_process	0.013467	0.47663	19	1033	206	19500	ENSG00000075413,ENSG00000141480,ENSG00000164362,ENSG00000213923,ENSG00000087274,ENSG00000108840,ENSG00000101109,ENSG00000087586,ENSG00000102882,ENSG00000087088,ENSG00000123384,ENSG00000167895,ENSG00000135924,ENSG00000148737,ENSG00000167110,ENSG00000084764,ENSG00000166851,ENSG00000096384,ENSG00000013573
GO:0016605	PML body	cellular_component	0.013543	0.47663	11	1033	97	19500	ENSG00000164362,ENSG00000197299,ENSG00000179583,ENSG00000140464,ENSG00000184900,ENSG00000011243,ENSG00000102034,ENSG00000148737,ENSG00000125952,ENSG00000072609,ENSG00000163349
GO:0008026	ATP-dependent helicase activity	molecular_function	0.013548	0.47663	11	1033	97	19500	ENSG00000144028,ENSG00000197299,ENSG00000111642,ENSG00000123064,ENSG00000198563,ENSG00000166508,ENSG00000005007,ENSG00000013573,ENSG00000204351,ENSG00000157349,ENSG00000067596
GO:0070035	purine NTP-dependent helicase activity	molecular_function	0.013548	0.47663	11	1033	97	19500	ENSG00000204351,ENSG00000013573,ENSG00000157349,ENSG00000067596,ENSG00000198563,ENSG00000123064,ENSG00000111642,ENSG00000197299,ENSG00000144028,ENSG00000005007,ENSG00000166508
GO:0046474	glycerophospholipid biosynthetic process	biological_process	0.013569	0.47663	21	1033	235	19500	ENSG00000198825,ENSG00000168918,ENSG00000007541,ENSG00000129219,ENSG00000241878,ENSG00000184381,ENSG00000169692,ENSG00000119227,ENSG00000145214,ENSG00000103502,ENSG00000105647,ENSG00000143845,ENSG00000143393,ENSG00000165282,ENSG00000174915,ENSG00000161217,ENSG00000102125,ENSG00000171100,ENSG00000108474,ENSG00000164687,ENSG00000069998
GO:0043112	receptor metabolic process	biological_process	0.013576	0.47663	16	1033	164	19500	ENSG00000100151,ENSG00000141480,ENSG00000110651,ENSG00000014216,ENSG00000168522,ENSG00000198825,ENSG00000185236,ENSG00000140564,ENSG00000123384,ENSG00000161203,ENSG00000132329,ENSG00000106976,ENSG00000122679,ENSG00000042753,ENSG00000079805,ENSG00000173020
GO:0097193	intrinsic apoptotic signaling pathway	biological_process	0.013582	0.47663	25	1033	294	19500	ENSG00000048028,ENSG00000149428,ENSG00000087088,ENSG00000171552,ENSG00000130427,ENSG00000140464,ENSG00000129465,ENSG00000213619,ENSG00000133317,ENSG00000163349,ENSG00000172667,ENSG00000185825,ENSG00000185499,ENSG00000162298,ENSG00000174775,ENSG00000105327,ENSG00000131871,ENSG00000158941,ENSG00000071051,ENSG00000170315,ENSG00000136305,ENSG00000178719,ENSG00000011422,ENSG00000143546,ENSG00000213145
GO:0051259	protein oligomerization	biological_process	0.013651	0.47827	41	1033	541	19500	ENSG00000173821,ENSG00000124713,ENSG00000211445,ENSG00000184640,ENSG00000072506,ENSG00000155366,ENSG00000135124,ENSG00000106976,ENSG00000160741,ENSG00000163382,ENSG00000105327,ENSG00000165816,ENSG00000182199,ENSG00000197299,ENSG00000011485,ENSG00000187446,ENSG00000179526,ENSG00000011451,ENSG00000067225,ENSG00000197043,ENSG00000101294,ENSG00000167895,ENSG00000129465,ENSG00000078369,ENSG00000136802…
GO:0043170	macromolecule metabolic process	biological_process	0.013826	0.48361	550	1033	9723	19500	ENSG00000197976,ENSG00000072310,ENSG00000170315,ENSG00000137218,ENSG00000128284,ENSG00000119227,ENSG00000215021,ENSG00000138835,ENSG00000132518,ENSG00000179335,ENSG00000172534,ENSG00000141551,ENSG00000071564,ENSG00000166169,ENSG00000155906,ENSG00000088038,ENSG00000148824,ENSG00000176087,ENSG00000126091,ENSG00000157514,ENSG00000214022,ENSG00000140474,ENSG00000198914,ENSG00000204220,ENSG00000198945…
GO:0005938	cell cortex	cellular_component	0.01385	0.48365	22	1033	250	19500	ENSG00000165699,ENSG00000102879,ENSG00000108518,ENSG00000196924,ENSG00000120899,ENSG00000139437,ENSG00000167460,ENSG00000085733,ENSG00000184640,ENSG00000137497,ENSG00000172757,ENSG00000165802,ENSG00000099331,ENSG00000113758,ENSG00000136279,ENSG00000160360,ENSG00000185215,ENSG00000079819,ENSG00000136732,ENSG00000123159,ENSG00000100092,ENSG00000071127
GO:0045017	glycerolipid biosynthetic process	biological_process	0.013998	0.48629	23	1033	265	19500	ENSG00000241878,ENSG00000129219,ENSG00000198825,ENSG00000168918,ENSG00000007541,ENSG00000184381,ENSG00000145214,ENSG00000119227,ENSG00000169692,ENSG00000103502,ENSG00000072310,ENSG00000105647,ENSG00000143845,ENSG00000143393,ENSG00000174915,ENSG00000161217,ENSG00000165282,ENSG00000102125,ENSG00000171100,ENSG00000108474,ENSG00000164687,ENSG00000073060,ENSG00000069998
GO:0032720	negative regulation of tumor necrosis factor production	biological_process	0.014016	0.48629	7	1033	49	19500	ENSG00000131871,ENSG00000100300,ENSG00000105298,ENSG00000101425,ENSG00000258839,ENSG00000084207,ENSG00000141480
GO:0097178	ruffle assembly	biological_process	0.01402	0.48629	6	1033	38	19500	ENSG00000174775,ENSG00000108518,ENSG00000196405,ENSG00000177106,ENSG00000090339,ENSG00000136279
GO:0032715	negative regulation of interleukin-6 production	biological_process	0.014044	0.48629	6	1033	38	19500	ENSG00000141480,ENSG00000101425,ENSG00000127528,ENSG00000142405,ENSG00000168918,ENSG00000131871
GO:0045429	positive regulation of nitric oxide biosynthetic process	biological_process	0.014063	0.48629	6	1033	38	19500	ENSG00000090339,ENSG00000120899,ENSG00000079805,ENSG00000135124,ENSG00000127528,ENSG00000096384
GO:1904407	positive regulation of nitric oxide metabolic process	biological_process	0.014063	0.48629	6	1033	38	19500	ENSG00000120899,ENSG00000090339,ENSG00000079805,ENSG00000096384,ENSG00000127528,ENSG00000135124
GO:0030003	cellular cation homeostasis	biological_process	0.014126	0.48706	44	1033	590	19500	ENSG00000145740,ENSG00000131504,ENSG00000160014,ENSG00000017260,ENSG00000125148,ENSG00000156026,ENSG00000107745,ENSG00000141837,ENSG00000181045,ENSG00000185825,ENSG00000125648,ENSG00000127533,ENSG00000102882,ENSG00000135740,ENSG00000171130,ENSG00000102805,ENSG00000078369,ENSG00000178752,ENSG00000087088,ENSG00000117410,ENSG00000187446,ENSG00000178719,ENSG00000165125,ENSG00000154118,ENSG00000143546…
GO:0051260	protein homooligomerization	biological_process	0.014132	0.48706	27	1033	325	19500	ENSG00000135124,ENSG00000167110,ENSG00000137275,ENSG00000160741,ENSG00000163382,ENSG00000173821,ENSG00000124713,ENSG00000211445,ENSG00000129465,ENSG00000072506,ENSG00000087088,ENSG00000155366,ENSG00000179526,ENSG00000149925,ENSG00000160404,ENSG00000067225,ENSG00000197043,ENSG00000101294,ENSG00000076555,ENSG00000105327,ENSG00000100721,ENSG00000167977,ENSG00000196405,ENSG00000165816,ENSG00000197299…
GO:0006811	ion transport	biological_process	0.014184	0.48806	104	1033	1591	19500	ENSG00000172482,ENSG00000130427,ENSG00000040487,ENSG00000123159,ENSG00000122679,ENSG00000135124,ENSG00000129657,ENSG00000101187,ENSG00000102879,ENSG00000159212,ENSG00000183172,ENSG00000241837,ENSG00000165915,ENSG00000259803,ENSG00000187446,ENSG00000137266,ENSG00000168763,ENSG00000100991,ENSG00000165125,ENSG00000139890,ENSG00000120899,ENSG00000104783,ENSG00000127533,ENSG00000177542,ENSG00000171130…
GO:0050852	T cell receptor signaling pathway	biological_process	0.014299	0.49123	13	1033	124	19500	ENSG00000168918,ENSG00000213658,ENSG00000125826,ENSG00000111361,ENSG00000015285,ENSG00000130775,ENSG00000105647,ENSG00000167851,ENSG00000173039,ENSG00000026950,ENSG00000104783,ENSG00000056586,ENSG00000174775
GO:0051336	regulation of hydrolase activity	biological_process	0.014333	0.49162	83	1033	1234	19500	ENSG00000160014,ENSG00000141522,ENSG00000124570,ENSG00000127948,ENSG00000133138,ENSG00000174775,ENSG00000103148,ENSG00000071205,ENSG00000185825,ENSG00000160360,ENSG00000174791,ENSG00000149131,ENSG00000141968,ENSG00000096384,ENSG00000137880,ENSG00000167851,ENSG00000242247,ENSG00000196743,ENSG00000099991,ENSG00000196576,ENSG00000133612,ENSG00000142405,ENSG00000138835,ENSG00000114353,ENSG00000108262…
GO:0038093	Fc receptor signaling pathway	biological_process	0.01438	0.49242	17	1033	179	19500	ENSG00000102882,ENSG00000173039,ENSG00000062598,ENSG00000096384,ENSG00000141968,ENSG00000197879,ENSG00000105647,ENSG00000170909,ENSG00000086730,ENSG00000170345,ENSG00000015285,ENSG00000131196,ENSG00000184381,ENSG00000160691,ENSG00000175866,ENSG00000129219,ENSG00000213658
GO:0055082	cellular chemical homeostasis	biological_process	0.01442	0.493	53	1033	736	19500	ENSG00000078369,ENSG00000178752,ENSG00000087088,ENSG00000117410,ENSG00000112759,ENSG00000135740,ENSG00000171130,ENSG00000102805,ENSG00000127533,ENSG00000102225,ENSG00000102882,ENSG00000125648,ENSG00000185825,ENSG00000181045,ENSG00000141837,ENSG00000107745,ENSG00000156026,ENSG00000187486,ENSG00000185236,ENSG00000125148,ENSG00000172057,ENSG00000131504,ENSG00000160014,ENSG00000017260,ENSG00000071054…
GO:0065009	regulation of molecular function	biological_process	0.014534	0.49363	191	1033	3117	19500	ENSG00000141506,ENSG00000084764,ENSG00000100092,ENSG00000168487,ENSG00000198909,ENSG00000100401,ENSG00000176170,ENSG00000266173,ENSG00000114993,ENSG00000130427,ENSG00000079999,ENSG00000068903,ENSG00000087586,ENSG00000197283,ENSG00000168522,ENSG00000213658,ENSG00000139890,ENSG00000143546,ENSG00000127561,ENSG00000146674,ENSG00000165861,ENSG00000087274,ENSG00000158941,ENSG00000172939,ENSG00000172936…
GO:0051276	chromosome organization	biological_process	0.014599	0.49363	77	1033	1134	19500	ENSG00000111642,ENSG00000105011,ENSG00000140464,ENSG00000061273,ENSG00000172534,ENSG00000188486,ENSG00000165702,ENSG00000139613,ENSG00000013573,ENSG00000071539,ENSG00000163930,ENSG00000160741,ENSG00000106462,ENSG00000134013,ENSG00000197299,ENSG00000072310,ENSG00000204227,ENSG00000257949,ENSG00000005007,ENSG00000215021,ENSG00000011243,ENSG00000152457,ENSG00000122390,ENSG00000170315,ENSG00000205531…
GO:0032943	mononuclear cell proliferation	biological_process	0.014601	0.49363	23	1033	266	19500	ENSG00000168071,ENSG00000087088,ENSG00000151208,ENSG00000130427,ENSG00000129465,ENSG00000175505,ENSG00000167851,ENSG00000240505,ENSG00000056586,ENSG00000172936,ENSG00000160685,ENSG00000026950,ENSG00000125347,ENSG00000186827,ENSG00000013725,ENSG00000102879,ENSG00000168918,ENSG00000105639,ENSG00000106348,ENSG00000096996,ENSG00000102034,ENSG00000110651,ENSG00000071051
GO:0071526	semaphorin-plexin signaling pathway	biological_process	0.014656	0.49363	5	1033	28	19500	ENSG00000196924,ENSG00000196576,ENSG00000141522,ENSG00000100092,ENSG00000164050
GO:0030970	retrograde protein transport, ER to cytosol	biological_process	0.014659	0.49363	5	1033	28	19500	ENSG00000162298,ENSG00000135506,ENSG00000101294,ENSG00000185825,ENSG00000131871
GO:0009311	oligosaccharide metabolic process	biological_process	0.014667	0.49363	9	1033	73	19500	ENSG00000127415,ENSG00000196743,ENSG00000110080,ENSG00000171298,ENSG00000160408,ENSG00000126091,ENSG00000115525,ENSG00000130175,ENSG00000090581
GO:0032770	positive regulation of monooxygenase activity	biological_process	0.014671	0.49363	5	1033	28	19500	ENSG00000127948,ENSG00000120899,ENSG00000164362,ENSG00000073060,ENSG00000160014
GO:0007205	protein kinase C-activating G-protein coupled receptor signaling pathway	biological_process	0.014674	0.49363	5	1033	28	19500	ENSG00000149091,ENSG00000100151,ENSG00000145214,ENSG00000172232,ENSG00000123384
GO:0018345	protein palmitoylation	biological_process	0.014691	0.49363	5	1033	28	19500	ENSG00000147533,ENSG00000099904,ENSG00000163812,ENSG00000156599,ENSG00000160446
GO:0070661	leukocyte proliferation	biological_process	0.014691	0.49363	24	1033	281	19500	ENSG00000168918,ENSG00000105639,ENSG00000106348,ENSG00000096996,ENSG00000102034,ENSG00000110651,ENSG00000071051,ENSG00000026950,ENSG00000160685,ENSG00000125347,ENSG00000186827,ENSG00000013725,ENSG00000102879,ENSG00000172936,ENSG00000084207,ENSG00000168071,ENSG00000087088,ENSG00000151208,ENSG00000130427,ENSG00000175505,ENSG00000167851,ENSG00000129465,ENSG00000240505,ENSG00000056586
GO:0010975	regulation of neuron projection development	biological_process	0.014694	0.49363	35	1033	449	19500	ENSG00000151208,ENSG00000123384,ENSG00000130427,ENSG00000169242,ENSG00000004478,ENSG00000120949,ENSG00000079805,ENSG00000078699,ENSG00000124772,ENSG00000106462,ENSG00000117385,ENSG00000062524,ENSG00000164050,ENSG00000197283,ENSG00000120899,ENSG00000196576,ENSG00000135916,ENSG00000089820,ENSG00000165802,ENSG00000172757,ENSG00000088899,ENSG00000114745,ENSG00000113758,ENSG00000141837,ENSG00000165699…
GO:1901215	negative regulation of neuron death	biological_process	0.014997	0.49417	18	1033	194	19500	ENSG00000096384,ENSG00000141837,ENSG00000065361,ENSG00000149428,ENSG00000113742,ENSG00000175505,ENSG00000130427,ENSG00000171552,ENSG00000087088,ENSG00000123384,ENSG00000120899,ENSG00000197283,ENSG00000102879,ENSG00000141480,ENSG00000174775,ENSG00000165699,ENSG00000011485,ENSG00000164362
GO:0044723	single-organism carbohydrate metabolic process	biological_process	0.015072	0.49417	50	1033	689	19500	ENSG00000196743,ENSG00000127415,ENSG00000077463,ENSG00000132329,ENSG00000102805,ENSG00000176383,ENSG00000111669,ENSG00000164687,ENSG00000165905,ENSG00000158773,ENSG00000167889,ENSG00000102100,ENSG00000167110,ENSG00000114745,ENSG00000115525,ENSG00000162298,ENSG00000187486,ENSG00000076555,ENSG00000110080,ENSG00000108515,ENSG00000117682,ENSG00000160211,ENSG00000149639,ENSG00000126091,ENSG00000180549…
GO:0009628	response to abiotic stimulus	biological_process	0.015113	0.49417	76	1033	1119	19500	ENSG00000120949,ENSG00000136710,ENSG00000179583,ENSG00000068903,ENSG00000130427,ENSG00000204516,ENSG00000170633,ENSG00000067225,ENSG00000157227,ENSG00000197283,ENSG00000120899,ENSG00000196428,ENSG00000167965,ENSG00000187446,ENSG00000158941,ENSG00000125347,ENSG00000181218,ENSG00000172936,ENSG00000172939,ENSG00000182871,ENSG00000173039,ENSG00000112759,ENSG00000087088,ENSG00000136802,ENSG00000102882…
GO:0050657	nucleic acid transport	biological_process	0.015126	0.49417	17	1033	180	19500	ENSG00000198563,ENSG00000014164,ENSG00000197879,ENSG00000063244,ENSG00000169371,ENSG00000138757,ENSG00000082898,ENSG00000132507,ENSG00000157349,ENSG00000165699,ENSG00000005007,ENSG00000162385,ENSG00000128311,ENSG00000205323,ENSG00000116350,ENSG00000011243,ENSG00000102898
GO:0050658	RNA transport	biological_process	0.015126	0.49417	17	1033	180	19500	ENSG00000138757,ENSG00000169371,ENSG00000063244,ENSG00000197879,ENSG00000157349,ENSG00000132507,ENSG00000082898,ENSG00000198563,ENSG00000014164,ENSG00000011243,ENSG00000116350,ENSG00000205323,ENSG00000102898,ENSG00000165699,ENSG00000162385,ENSG00000128311,ENSG00000005007
GO:0051236	establishment of RNA localization	biological_process	0.015126	0.49417	17	1033	180	19500	ENSG00000014164,ENSG00000198563,ENSG00000082898,ENSG00000132507,ENSG00000157349,ENSG00000197879,ENSG00000169371,ENSG00000063244,ENSG00000138757,ENSG00000005007,ENSG00000128311,ENSG00000162385,ENSG00000165699,ENSG00000102898,ENSG00000205323,ENSG00000116350,ENSG00000011243
GO:0051238	sequestering of metal ion	biological_process	0.015161	0.49417	13	1033	125	19500	ENSG00000087088,ENSG00000105327,ENSG00000127533,ENSG00000102879,ENSG00000120899,ENSG00000125648,ENSG00000085872,ENSG00000143546,ENSG00000131504,ENSG00000160014,ENSG00000051523,ENSG00000154118,ENSG00000145740
GO:0002444	myeloid leukocyte mediated immunity	biological_process	0.015264	0.49417	41	1033	545	19500	ENSG00000213658,ENSG00000067225,ENSG00000143546,ENSG00000169692,ENSG00000011422,ENSG00000086730,ENSG00000170909,ENSG00000244038,ENSG00000100321,ENSG00000051523,ENSG00000136279,ENSG00000185627,ENSG00000116815,ENSG00000143621,ENSG00000171298,ENSG00000196230,ENSG00000204435,ENSG00000106348,ENSG00000069424,ENSG00000172057,ENSG00000131504,ENSG00000064601,ENSG00000149925,ENSG00000106244,ENSG00000014216…
GO:0051247	positive regulation of protein metabolic process	biological_process	0.015342	0.49417	105	1033	1613	19500	ENSG00000096384,ENSG00000167110,ENSG00000148737,ENSG00000114745,ENSG00000172232,ENSG00000185825,ENSG00000110931,ENSG00000104814,ENSG00000169689,ENSG00000167851,ENSG00000101109,ENSG00000176087,ENSG00000145214,ENSG00000160014,ENSG00000071054,ENSG00000174775,ENSG00000158321,ENSG00000100083,ENSG00000106462,ENSG00000168397,ENSG00000162517,ENSG00000034152,ENSG00000155906,ENSG00000175920,ENSG00000122641…
GO:0016575	histone deacetylation	biological_process	0.01537	0.49417	10	1033	86	19500	ENSG00000160685,ENSG00000061273,ENSG00000072310,ENSG00000135365,ENSG00000077463,ENSG00000068903,ENSG00000111642,ENSG00000127511,ENSG00000011243,ENSG00000108840
GO:0097643	amylin receptor activity	molecular_function	0.015375	0.49417	2	1033	4	19500	ENSG00000122679,ENSG00000132329
GO:1903440	amylin receptor complex	cellular_component	0.015375	0.49417	2	1033	4	19500	ENSG00000122679,ENSG00000132329
GO:1902527	positive regulation of protein monoubiquitination	biological_process	0.015395	0.49417	2	1033	4	19500	ENSG00000162517,ENSG00000170315
GO:0005757	mitochondrial permeability transition pore complex	cellular_component	0.015453	0.49417	2	1033	4	19500	ENSG00000087088,ENSG00000197912
GO:0051771	negative regulation of nitric-oxide synthase biosynthetic process	biological_process	0.015455	0.49417	2	1033	4	19500	ENSG00000131871,ENSG00000084207
GO:0009182	purine deoxyribonucleoside diphosphate metabolic process	biological_process	0.015509	0.49417	2	1033	4	19500	ENSG00000275074,ENSG00000143774
GO:1901842	negative regulation of high voltage-gated calcium channel activity	biological_process	0.015589	0.49417	2	1033	4	19500	ENSG00000139890,ENSG00000166592
GO:1903018	regulation of glycoprotein metabolic process	biological_process	0.015597	0.49417	7	1033	50	19500	ENSG00000187446,ENSG00000167110,ENSG00000148737,ENSG00000135916,ENSG00000275700,ENSG00000105639,ENSG00000132329
GO:0030043	actin filament fragmentation	biological_process	0.015602	0.49417	2	1033	4	19500	ENSG00000071127,ENSG00000172757
GO:0070973	protein localization to endoplasmic reticulum exit site	biological_process	0.015608	0.49417	2	1033	4	19500	ENSG00000185825,ENSG00000107862
GO:0001515	opioid peptide activity	molecular_function	0.015626	0.49417	2	1033	4	19500	ENSG00000149798,ENSG00000168081
GO:0070236	negative regulation of activation-induced cell death of T cells	biological_process	0.015643	0.49417	2	1033	4	19500	ENSG00000166925,ENSG00000157514
GO:0034124	regulation of MyD88-dependent toll-like receptor signaling pathway	biological_process	0.015655	0.49417	2	1033	4	19500	ENSG00000167851,ENSG00000125347
GO:0015189	L-lysine transmembrane transporter activity	molecular_function	0.015655	0.49417	2	1033	4	19500	ENSG00000197119,ENSG00000040487
GO:0015819	lysine transport	biological_process	0.015655	0.49417	2	1033	4	19500	ENSG00000040487,ENSG00000197119
GO:1902022	L-lysine transport	biological_process	0.015655	0.49417	2	1033	4	19500	ENSG00000040487,ENSG00000197119
GO:1903401	L-lysine transmembrane transport	biological_process	0.015655	0.49417	2	1033	4	19500	ENSG00000040487,ENSG00000197119
GO:0070086	ubiquitin-dependent endocytosis	biological_process	0.01566	0.49417	2	1033	4	19500	ENSG00000160948,ENSG00000148356
GO:0030473	nuclear migration along microtubule	biological_process	0.015661	0.49417	2	1033	4	19500	ENSG00000100242,ENSG00000054654
GO:0006545	glycine biosynthetic process	biological_process	0.015661	0.49417	2	1033	4	19500	ENSG00000172482,ENSG00000182199
GO:2001270	regulation of cysteine-type endopeptidase activity involved in execution phase of apoptosis	biological_process	0.015662	0.49417	2	1033	4	19500	ENSG00000092871,ENSG00000170633
GO:0030951	establishment or maintenance of microtubule cytoskeleton polarity	biological_process	0.015664	0.49417	2	1033	4	19500	ENSG00000142945,ENSG00000160789
GO:0060282	positive regulation of oocyte development	biological_process	0.015664	0.49417	2	1033	4	19500	ENSG00000068903,ENSG00000087586
GO:0046898	response to cycloheximide	biological_process	0.015664	0.49417	2	1033	4	19500	ENSG00000127528,ENSG00000171552
GO:1901837	negative regulation of transcription of nuclear large rRNA transcript from RNA polymerase I promoter	biological_process	0.015665	0.49417	2	1033	4	19500	ENSG00000158796,ENSG00000113648
GO:0047696	beta-adrenergic receptor kinase activity	molecular_function	0.015665	0.49417	2	1033	4	19500	ENSG00000173020,ENSG00000198055
GO:0048499	synaptic vesicle membrane organization	biological_process	0.015665	0.49417	2	1033	4	19500	ENSG00000100321,ENSG00000108639
GO:0070995	NADPH oxidation	biological_process	0.015665	0.49417	2	1033	4	19500	ENSG00000069424,ENSG00000161513
GO:0031749	D2 dopamine receptor binding	molecular_function	0.015665	0.49417	2	1033	4	19500	ENSG00000106976,ENSG00000079805
GO:0060800	regulation of cell differentiation involved in embryonic placenta development	biological_process	0.015665	0.49417	2	1033	4	19500	ENSG00000101109,ENSG00000137270
GO:1903349	omegasome membrane	cellular_component	0.015665	0.49417	2	1033	4	19500	ENSG00000165861,ENSG00000177169
GO:0017069	snRNA binding	molecular_function	0.015796	0.49622	6	1033	39	19500	ENSG00000198563,ENSG00000104852,ENSG00000157110,ENSG00000132507,ENSG00000204392,ENSG00000077312
GO:0071294	cellular response to zinc ion	biological_process	0.015894	0.49622	4	1033	19	19500	ENSG00000122986,ENSG00000100300,ENSG00000125148,ENSG00000135124
GO:0018279	protein N-linked glycosylation via asparagine	biological_process	0.015896	0.49622	6	1033	39	19500	ENSG00000115525,ENSG00000160408,ENSG00000162298,ENSG00000126091,ENSG00000110080,ENSG00000244038
GO:0018105	peptidyl-serine phosphorylation	biological_process	0.015904	0.49622	25	1033	298	19500	ENSG00000166851,ENSG00000122679,ENSG00000096384,ENSG00000137275,ENSG00000101266,ENSG00000173020,ENSG00000116670,ENSG00000110931,ENSG00000104814,ENSG00000102882,ENSG00000114738,ENSG00000141551,ENSG00000130427,ENSG00000087088,ENSG00000101109,ENSG00000071051,ENSG00000145214,ENSG00000070770,ENSG00000198825,ENSG00000177169,ENSG00000087586,ENSG00000141480,ENSG00000100721,ENSG00000075413,ENSG00000213923
GO:0002446	neutrophil mediated immunity	biological_process	0.015956	0.49622	38	1033	499	19500	ENSG00000196743,ENSG00000005844,ENSG00000164687,ENSG00000133246,ENSG00000167851,ENSG00000071127,ENSG00000096384,ENSG00000084207,ENSG00000180448,ENSG00000172232,ENSG00000101425,ENSG00000124570,ENSG00000122986,ENSG00000147533,ENSG00000167613,ENSG00000149925,ENSG00000064601,ENSG00000014216,ENSG00000106244,ENSG00000131504,ENSG00000172057,ENSG00000106348,ENSG00000069424,ENSG00000204435,ENSG00000196230…
GO:1900076	regulation of cellular response to insulin stimulus	biological_process	0.015965	0.49622	9	1033	74	19500	ENSG00000197879,ENSG00000114353,ENSG00000165816,ENSG00000124160,ENSG00000160685,ENSG00000165699,ENSG00000105647,ENSG00000173039,ENSG00000163884
GO:0010560	positive regulation of glycoprotein biosynthetic process	biological_process	0.015968	0.49622	4	1033	19	19500	ENSG00000187446,ENSG00000148737,ENSG00000167110,ENSG00000132329
GO:0032332	positive regulation of chondrocyte differentiation	biological_process	0.015986	0.49622	4	1033	19	19500	ENSG00000127948,ENSG00000134013,ENSG00000165804,ENSG00000173039
GO:0016780	phosphotransferase activity, for other substituted phosphate groups	molecular_function	0.016009	0.49622	4	1033	19	19500	ENSG00000090581,ENSG00000174915,ENSG00000165282,ENSG00000103502
GO:1902236	negative regulation of endoplasmic reticulum stress-induced intrinsic apoptotic signaling pathway	biological_process	0.016009	0.49622	4	1033	19	19500	ENSG00000149428,ENSG00000178719,ENSG00000162298,ENSG00000131871
GO:0017049	GTP-Rho binding	molecular_function	0.016025	0.49622	4	1033	19	19500	ENSG00000188277,ENSG00000114993,ENSG00000128283,ENSG00000149798
GO:0005337	nucleoside transmembrane transporter activity	molecular_function	0.016031	0.49622	4	1033	19	19500	ENSG00000125648,ENSG00000112759,ENSG00000198246,ENSG00000157593
GO:0046716	muscle cell cellular homeostasis	biological_process	0.016033	0.49622	4	1033	19	19500	ENSG00000165905,ENSG00000171100,ENSG00000149925,ENSG00000171298
GO:1901135	carbohydrate derivative metabolic process	biological_process	0.016174	0.49948	81	1033	1207	19500	ENSG00000196743,ENSG00000111669,ENSG00000176383,ENSG00000166548,ENSG00000167110,ENSG00000213619,ENSG00000148737,ENSG00000125648,ENSG00000162298,ENSG00000114745,ENSG00000115525,ENSG00000068001,ENSG00000167792,ENSG00000108515,ENSG00000110080,ENSG00000100298,ENSG00000160211,ENSG00000149925,ENSG00000008130,ENSG00000157593,ENSG00000126091,ENSG00000275700,ENSG00000160014,ENSG00000102125,ENSG00000140990…
GO:0030183	B cell differentiation	biological_process	0.016186	0.49948	13	1033	126	19500	ENSG00000108840,ENSG00000152457,ENSG00000168918,ENSG00000122641,ENSG00000120899,ENSG00000028277,ENSG00000105639,ENSG00000157227,ENSG00000071564,ENSG00000087088,ENSG00000136802,ENSG00000116580,ENSG00000175505
GO:0043312	neutrophil degranulation	biological_process	0.016321	0.50292	37	1033	484	19500	ENSG00000133246,ENSG00000164687,ENSG00000167851,ENSG00000005844,ENSG00000196743,ENSG00000172232,ENSG00000180448,ENSG00000084207,ENSG00000096384,ENSG00000122986,ENSG00000167613,ENSG00000147533,ENSG00000101425,ENSG00000124570,ENSG00000106348,ENSG00000069424,ENSG00000172057,ENSG00000131504,ENSG00000064601,ENSG00000149925,ENSG00000106244,ENSG00000014216,ENSG00000171298,ENSG00000196230,ENSG00000204435…
GO:0005975	carbohydrate metabolic process	biological_process	0.016374	0.50317	55	1033	774	19500	ENSG00000160741,ENSG00000185499,ENSG00000090581,ENSG00000124713,ENSG00000171298,ENSG00000068903,ENSG00000181830,ENSG00000160408,ENSG00000119227,ENSG00000187446,ENSG00000007541,ENSG00000131446,ENSG00000120899,ENSG00000067225,ENSG00000244038,ENSG00000124357,ENSG00000117448,ENSG00000146674,ENSG00000131871,ENSG00000120820,ENSG00000158089,ENSG00000167110,ENSG00000158773,ENSG00000165905,ENSG00000102100…
GO:0009987	cellular process	biological_process	0.016377	0.50317	886	1033	16253	19500	ENSG00000132716,ENSG00000169682,ENSG00000142945,ENSG00000105323,ENSG00000215421,ENSG00000164050,ENSG00000013725,ENSG00000107338,ENSG00000165816,ENSG00000162385,ENSG00000166900,ENSG00000182134,ENSG00000239282,ENSG00000042753,ENSG00000104343,ENSG00000141098,ENSG00000101187,ENSG00000139832,ENSG00000136279,ENSG00000052841,ENSG00000133313,ENSG00000105701,ENSG00000106006,ENSG00000229117,ENSG00000111843…
GO:0044711	single-organism biosynthetic process	biological_process	0.016415	0.50363	115	1033	1790	19500	ENSG00000117682,ENSG00000156990,ENSG00000125445,ENSG00000164362,ENSG00000130717,ENSG00000149639,ENSG00000076555,ENSG00000141480,ENSG00000114770,ENSG00000136143,ENSG00000106348,ENSG00000004455,ENSG00000121578,ENSG00000006695,ENSG00000141696,ENSG00000073060,ENSG00000108474,ENSG00000069998,ENSG00000077514,ENSG00000102882,ENSG00000138031,ENSG00000173540,ENSG00000165282,ENSG00000174915,ENSG00000171100…
GO:0043299	leukocyte degranulation	biological_process	0.016549	0.50639	40	1033	532	19500	ENSG00000204435,ENSG00000171298,ENSG00000196230,ENSG00000185627,ENSG00000116815,ENSG00000143621,ENSG00000100321,ENSG00000051523,ENSG00000136279,ENSG00000244038,ENSG00000102879,ENSG00000086730,ENSG00000170909,ENSG00000169692,ENSG00000011422,ENSG00000213658,ENSG00000067225,ENSG00000143546,ENSG00000005844,ENSG00000196743,ENSG00000133246,ENSG00000164687,ENSG00000167851,ENSG00000096384,ENSG00000084207…
GO:0098798	mitochondrial protein complex	cellular_component	0.016553	0.50639	17	1033	182	19500	ENSG00000130414,ENSG00000248098,ENSG00000241837,ENSG00000156026,ENSG00000107745,ENSG00000167792,ENSG00000156411,ENSG00000183172,ENSG00000174886,ENSG00000197912,ENSG00000087088,ENSG00000072506,ENSG00000105341,ENSG00000130204,ENSG00000170906,ENSG00000140990,ENSG00000213619
GO:0045184	establishment of protein localization	biological_process	0.016676	0.50942	121	1033	1895	19500	ENSG00000135506,ENSG00000164362,ENSG00000156026,ENSG00000110801,ENSG00000141480,ENSG00000167461,ENSG00000162236,ENSG00000100228,ENSG00000160789,ENSG00000028277,ENSG00000113648,ENSG00000085733,ENSG00000064601,ENSG00000109083,ENSG00000155660,ENSG00000087088,ENSG00000117410,ENSG00000161203,ENSG00000132329,ENSG00000171130,ENSG00000095321,ENSG00000132780,ENSG00000034053,ENSG00000102882,ENSG00000104783…
GO:0043025	neuronal cell body	cellular_component	0.016739	0.5106	36	1033	469	19500	ENSG00000158555,ENSG00000187778,ENSG00000137497,ENSG00000165802,ENSG00000104783,ENSG00000168081,ENSG00000174791,ENSG00000113763,ENSG00000096384,ENSG00000141837,ENSG00000187486,ENSG00000167461,ENSG00000133216,ENSG00000143740,ENSG00000088325,ENSG00000198825,ENSG00000175866,ENSG00000068903,ENSG00000185800,ENSG00000123384,ENSG00000172534,ENSG00000004478,ENSG00000166963,ENSG00000124772,ENSG00000051523…
GO:0030427	site of polarized growth	cellular_component	0.01683	0.51258	16	1033	168	19500	ENSG00000004478,ENSG00000113742,ENSG00000068903,ENSG00000158555,ENSG00000089820,ENSG00000096384,ENSG00000079805,ENSG00000126214,ENSG00000113758,ENSG00000166900,ENSG00000158321,ENSG00000165699,ENSG00000085733,ENSG00000160991,ENSG00000120899,ENSG00000160014
GO:0090200	positive regulation of release of cytochrome c from mitochondria	biological_process	0.016872	0.51258	5	1033	29	19500	ENSG00000184381,ENSG00000087088,ENSG00000011422,ENSG00000136305,ENSG00000105327
GO:0033014	tetrapyrrole biosynthetic process	biological_process	0.016912	0.51258	5	1033	29	19500	ENSG00000006695,ENSG00000111843,ENSG00000136143,ENSG00000135100,ENSG00000100300
GO:0001530	lipopolysaccharide binding	molecular_function	0.016946	0.51258	5	1033	29	19500	ENSG00000159674,ENSG00000073060,ENSG00000101425,ENSG00000013725,ENSG00000181790
GO:1903146	regulation of mitophagy	biological_process	0.01695	0.51258	5	1033	29	19500	ENSG00000085733,ENSG00000072310,ENSG00000100300,ENSG00000110931,ENSG00000070770
GO:0061036	positive regulation of cartilage development	biological_process	0.016953	0.51258	5	1033	29	19500	ENSG00000134013,ENSG00000127948,ENSG00000165804,ENSG00000173039,ENSG00000168487
GO:0015215	nucleotide transmembrane transporter activity	molecular_function	0.016991	0.51258	5	1033	29	19500	ENSG00000125648,ENSG00000181830,ENSG00000176087,ENSG00000102100,ENSG00000157593
GO:0009725	response to hormone	biological_process	0.016997	0.51258	60	1033	858	19500	ENSG00000122641,ENSG00000197879,ENSG00000051523,ENSG00000100401,ENSG00000122679,ENSG00000106462,ENSG00000142330,ENSG00000163884,ENSG00000130427,ENSG00000172482,ENSG00000204435,ENSG00000166986,ENSG00000114353,ENSG00000116350,ENSG00000120899,ENSG00000067225,ENSG00000105639,ENSG00000157227,ENSG00000182749,ENSG00000111361,ENSG00000129071,ENSG00000170345,ENSG00000160685,ENSG00000167548,ENSG00000160781…
GO:0018210	peptidyl-threonine modification	biological_process	0.0172	0.51771	13	1033	127	19500	ENSG00000204435,ENSG00000176170,ENSG00000068903,ENSG00000101266,ENSG00000145214,ENSG00000172939,ENSG00000166851,ENSG00000177169,ENSG00000110931,ENSG00000185324,ENSG00000160014,ENSG00000173020,ENSG00000172232
GO:1903556	negative regulation of tumor necrosis factor superfamily cytokine production	biological_process	0.017258	0.51771	7	1033	51	19500	ENSG00000131871,ENSG00000100300,ENSG00000105298,ENSG00000101425,ENSG00000084207,ENSG00000258839,ENSG00000141480
GO:2000021	regulation of ion homeostasis	biological_process	0.017269	0.51771	18	1033	197	19500	ENSG00000127533,ENSG00000087088,ENSG00000130427,ENSG00000140464,ENSG00000135124,ENSG00000125648,ENSG00000051523,ENSG00000105327,ENSG00000102879,ENSG00000083454,ENSG00000100300,ENSG00000154118,ENSG00000145740,ENSG00000120899,ENSG00000114353,ENSG00000085872,ENSG00000131504,ENSG00000160014
GO:1904666	regulation of ubiquitin protein ligase activity	biological_process	0.017283	0.51771	7	1033	51	19500	ENSG00000167110,ENSG00000166851,ENSG00000110200,ENSG00000154473,ENSG00000071539,ENSG00000114745,ENSG00000116670
GO:0030672	synaptic vesicle membrane	cellular_component	0.017289	0.51771	9	1033	75	19500	ENSG00000139190,ENSG00000149927,ENSG00000171552,ENSG00000127561,ENSG00000108639,ENSG00000160014,ENSG00000143740,ENSG00000185236,ENSG00000100321
GO:0097525	spliceosomal snRNP complex	cellular_component	0.017549	0.52478	8	1033	63	19500	ENSG00000157110,ENSG00000204392,ENSG00000198563,ENSG00000144028,ENSG00000104852,ENSG00000077312,ENSG00000108883,ENSG00000169976
GO:0017070	U6 snRNA binding	molecular_function	0.01763	0.52563	3	1033	11	19500	ENSG00000204392,ENSG00000132507,ENSG00000198563
GO:0061077	chaperone-mediated protein folding	biological_process	0.017647	0.52563	8	1033	63	19500	ENSG00000101266,ENSG00000155660,ENSG00000105701,ENSG00000160404,ENSG00000004478,ENSG00000117385,ENSG00000135924,ENSG00000140553
GO:0009162	deoxyribonucleoside monophosphate metabolic process	biological_process	0.01766	0.52563	3	1033	11	19500	ENSG00000143774,ENSG00000205309,ENSG00000166548
GO:1902018	negative regulation of cilium assembly	biological_process	0.017752	0.52563	3	1033	11	19500	ENSG00000139437,ENSG00000079805,ENSG00000185324
GO:0044650	adhesion of symbiont to host cell	biological_process	0.017754	0.52563	3	1033	11	19500	ENSG00000090339,ENSG00000110651,ENSG00000096384
GO:0045859	regulation of protein kinase activity	biological_process	0.017758	0.52563	56	1033	794	19500	ENSG00000197299,ENSG00000137843,ENSG00000142733,ENSG00000120875,ENSG00000120899,ENSG00000213658,ENSG00000138835,ENSG00000110651,ENSG00000170315,ENSG00000167965,ENSG00000187446,ENSG00000204673,ENSG00000266173,ENSG00000130427,ENSG00000128563,ENSG00000204435,ENSG00000169242,ENSG00000169727,ENSG00000175920,ENSG00000065361,ENSG00000198909,ENSG00000136279,ENSG00000141506,ENSG00000084764,ENSG00000034152…
GO:0045346	regulation of MHC class II biosynthetic process	biological_process	0.017766	0.52563	3	1033	11	19500	ENSG00000086102,ENSG00000172232,ENSG00000179583
GO:0002283	neutrophil activation involved in immune response	biological_process	0.017799	0.52563	37	1033	487	19500	ENSG00000106348,ENSG00000069424,ENSG00000172057,ENSG00000131504,ENSG00000064601,ENSG00000149925,ENSG00000014216,ENSG00000106244,ENSG00000122986,ENSG00000167613,ENSG00000147533,ENSG00000101425,ENSG00000124570,ENSG00000172232,ENSG00000180448,ENSG00000096384,ENSG00000084207,ENSG00000133246,ENSG00000164687,ENSG00000167851,ENSG00000005844,ENSG00000196743,ENSG00000067225,ENSG00000143546,ENSG00000169692…
GO:0072583	clathrin-mediated endocytosis	biological_process	0.017801	0.52563	6	1033	40	19500	ENSG00000161203,ENSG00000198825,ENSG00000130475,ENSG00000079805,ENSG00000042753,ENSG00000106976
GO:0051220	cytoplasmic sequestering of protein	biological_process	0.017842	0.52611	6	1033	40	19500	ENSG00000196924,ENSG00000138757,ENSG00000146232,ENSG00000079999,ENSG00000100300,ENSG00000135506
GO:0018196	peptidyl-asparagine modification	biological_process	0.017887	0.52672	6	1033	40	19500	ENSG00000110080,ENSG00000126091,ENSG00000244038,ENSG00000160408,ENSG00000162298,ENSG00000115525
GO:0046486	glycerolipid metabolic process	biological_process	0.017978	0.52866	34	1033	440	19500	ENSG00000169692,ENSG00000136699,ENSG00000168890,ENSG00000119227,ENSG00000184381,ENSG00000007541,ENSG00000129219,ENSG00000168918,ENSG00000105647,ENSG00000072310,ENSG00000102125,ENSG00000141506,ENSG00000149527,ENSG00000065361,ENSG00000161217,ENSG00000103502,ENSG00000100439,ENSG00000103066,ENSG00000149091,ENSG00000145214,ENSG00000198825,ENSG00000241878,ENSG00000143393,ENSG00000006007,ENSG00000143845…
GO:0018209	peptidyl-serine modification	biological_process	0.018353	0.53892	26	1033	317	19500	ENSG00000145214,ENSG00000071051,ENSG00000101109,ENSG00000087586,ENSG00000198825,ENSG00000177169,ENSG00000070770,ENSG00000075413,ENSG00000141480,ENSG00000100721,ENSG00000213923,ENSG00000101266,ENSG00000137275,ENSG00000122679,ENSG00000096384,ENSG00000166851,ENSG00000104814,ENSG00000110931,ENSG00000116670,ENSG00000173020,ENSG00000148335,ENSG00000141551,ENSG00000114738,ENSG00000102882,ENSG00000087088…
GO:0016050	vesicle organization	biological_process	0.018378	0.53892	29	1033	363	19500	ENSG00000127533,ENSG00000160948,ENSG00000141551,ENSG00000107862,ENSG00000139190,ENSG00000135441,ENSG00000087903,ENSG00000161203,ENSG00000042753,ENSG00000167110,ENSG00000054116,ENSG00000162517,ENSG00000106976,ENSG00000114745,ENSG00000132881,ENSG00000139832,ENSG00000102879,ENSG00000167461,ENSG00000166900,ENSG00000133138,ENSG00000054356,ENSG00000149927,ENSG00000156931,ENSG00000130475,ENSG00000148356…
GO:0046390	ribose phosphate biosynthetic process	biological_process	0.018532	0.54098	19	1033	213	19500	ENSG00000138031,ENSG00000172992,ENSG00000102125,ENSG00000138621,ENSG00000241837,ENSG00000160211,ENSG00000130717,ENSG00000143774,ENSG00000076555,ENSG00000106992,ENSG00000160014,ENSG00000067225,ENSG00000106348,ENSG00000047230,ENSG00000004455,ENSG00000114353,ENSG00000132518,ENSG00000157593,ENSG00000149925
GO:0051170	nuclear import	biological_process	0.018562	0.54098	19	1033	213	19500	ENSG00000157110,ENSG00000105647,ENSG00000102898,ENSG00000187446,ENSG00000160789,ENSG00000146232,ENSG00000133612,ENSG00000215021,ENSG00000142252,ENSG00000176973,ENSG00000079999,ENSG00000140464,ENSG00000096384,ENSG00000186642,ENSG00000109854,ENSG00000064419,ENSG00000169371,ENSG00000068001,ENSG00000138757
GO:0045732	positive regulation of protein catabolic process	biological_process	0.018582	0.54098	19	1033	213	19500	ENSG00000185825,ENSG00000072609,ENSG00000125447,ENSG00000166851,ENSG00000168397,ENSG00000101266,ENSG00000079999,ENSG00000135924,ENSG00000068903,ENSG00000123384,ENSG00000140564,ENSG00000160948,ENSG00000141551,ENSG00000087586,ENSG00000120899,ENSG00000162236,ENSG00000110651,ENSG00000213923,ENSG00000100083
GO:0030674	protein binding, bridging	molecular_function	0.018584	0.54098	16	1033	170	19500	ENSG00000161203,ENSG00000089820,ENSG00000185340,ENSG00000004478,ENSG00000166963,ENSG00000172534,ENSG00000184060,ENSG00000087266,ENSG00000042753,ENSG00000027869,ENSG00000107338,ENSG00000213658,ENSG00000175866,ENSG00000160691,ENSG00000071051,ENSG00000138606
GO:0030666	endocytic vesicle membrane	cellular_component	0.018587	0.54098	15	1033	156	19500	ENSG00000073060,ENSG00000171130,ENSG00000123384,ENSG00000161203,ENSG00000117410,ENSG00000167461,ENSG00000111186,ENSG00000102879,ENSG00000100151,ENSG00000051523,ENSG00000185236,ENSG00000079805,ENSG00000139832,ENSG00000042753,ENSG00000170315
GO:0021543	pallium development	biological_process	0.018601	0.54098	16	1033	170	19500	ENSG00000106462,ENSG00000108953,ENSG00000132510,ENSG00000040199,ENSG00000166780,ENSG00000188486,ENSG00000198914,ENSG00000100242,ENSG00000087088,ENSG00000123384,ENSG00000196924,ENSG00000070770,ENSG00000149571,ENSG00000134294,ENSG00000054654,ENSG00000165699
GO:0043547	positive regulation of GTPase activity	biological_process	0.018718	0.54363	32	1033	410	19500	ENSG00000180448,ENSG00000071205,ENSG00000184060,ENSG00000174791,ENSG00000141968,ENSG00000089820,ENSG00000159788,ENSG00000242247,ENSG00000099331,ENSG00000188277,ENSG00000141522,ENSG00000165699,ENSG00000132694,ENSG00000133138,ENSG00000174775,ENSG00000103148,ENSG00000100401,ENSG00000130052,ENSG00000100092,ENSG00000120318,ENSG00000106462,ENSG00000128283,ENSG00000149798,ENSG00000133612,ENSG00000138835…
GO:0021987	cerebral cortex development	biological_process	0.018765	0.54426	12	1033	115	19500	ENSG00000165699,ENSG00000123384,ENSG00000054654,ENSG00000087088,ENSG00000100242,ENSG00000198914,ENSG00000134294,ENSG00000166780,ENSG00000188486,ENSG00000108953,ENSG00000070770,ENSG00000196924
GO:0045892	negative regulation of transcription, DNA-templated	biological_process	0.018818	0.54504	83	1033	1249	19500	ENSG00000179583,ENSG00000079999,ENSG00000068903,ENSG00000149600,ENSG00000130427,ENSG00000171467,ENSG00000169242,ENSG00000185499,ENSG00000116670,ENSG00000158941,ENSG00000125347,ENSG00000167548,ENSG00000160685,ENSG00000188779,ENSG00000116580,ENSG00000181218,ENSG00000120057,ENSG00000006194,ENSG00000187446,ENSG00000173039,ENSG00000077463,ENSG00000204371,ENSG00000182872,ENSG00000129757,ENSG00000166851…
GO:0005747	mitochondrial respiratory chain complex I	cellular_component	0.018935	0.54504	7	1033	52	19500	ENSG00000213619,ENSG00000140990,ENSG00000170906,ENSG00000167792,ENSG00000130414,ENSG00000174886,ENSG00000105341
GO:0030964	NADH dehydrogenase complex	cellular_component	0.018935	0.54504	7	1033	52	19500	ENSG00000140990,ENSG00000213619,ENSG00000167792,ENSG00000170906,ENSG00000130414,ENSG00000174886,ENSG00000105341
GO:0045271	respiratory chain complex I	cellular_component	0.018935	0.54504	7	1033	52	19500	ENSG00000130414,ENSG00000174886,ENSG00000105341,ENSG00000140990,ENSG00000213619,ENSG00000170906,ENSG00000167792
GO:0016773	phosphotransferase activity, alcohol group as acceptor	molecular_function	0.019018	0.54504	56	1033	797	19500	ENSG00000142733,ENSG00000137843,ENSG00000062524,ENSG00000075413,ENSG00000105647,ENSG00000149923,ENSG00000105639,ENSG00000070770,ENSG00000067225,ENSG00000120899,ENSG00000087586,ENSG00000132518,ENSG00000179335,ENSG00000204435,ENSG00000141551,ENSG00000176170,ENSG00000266173,ENSG00000163349,ENSG00000034152,ENSG00000141506,ENSG00000173020,ENSG00000172992,ENSG00000065361,ENSG00000198909,ENSG00000198055…
GO:0032928	regulation of superoxide anion generation	biological_process	0.019037	0.54504	4	1033	20	19500	ENSG00000084207,ENSG00000275700,ENSG00000051523,ENSG00000114353
GO:0010257	NADH dehydrogenase complex assembly	biological_process	0.019081	0.54504	8	1033	64	19500	ENSG00000130414,ENSG00000105341,ENSG00000167792,ENSG00000174886,ENSG00000140990,ENSG00000213619,ENSG00000170906,ENSG00000102125
GO:0032981	mitochondrial respiratory chain complex I assembly	biological_process	0.019081	0.54504	8	1033	64	19500	ENSG00000167792,ENSG00000130414,ENSG00000105341,ENSG00000102125,ENSG00000170906,ENSG00000213619,ENSG00000140990,ENSG00000174886
GO:0097031	mitochondrial respiratory chain complex I biogenesis	biological_process	0.019081	0.54504	8	1033	64	19500	ENSG00000105341,ENSG00000130414,ENSG00000167792,ENSG00000174886,ENSG00000140990,ENSG00000213619,ENSG00000102125,ENSG00000170906
GO:0014013	regulation of gliogenesis	biological_process	0.019119	0.54504	11	1033	102	19500	ENSG00000106462,ENSG00000166145,ENSG00000071127,ENSG00000135124,ENSG00000175505,ENSG00000173039,ENSG00000068903,ENSG00000164362,ENSG00000100300,ENSG00000166780,ENSG00000136717
GO:0009199	ribonucleoside triphosphate metabolic process	biological_process	0.019131	0.54504	23	1033	273	19500	ENSG00000111669,ENSG00000077463,ENSG00000102125,ENSG00000170906,ENSG00000140990,ENSG00000213619,ENSG00000125648,ENSG00000167792,ENSG00000108515,ENSG00000106992,ENSG00000130414,ENSG00000143774,ENSG00000130717,ENSG00000100300,ENSG00000241837,ENSG00000182199,ENSG00000149925,ENSG00000006695,ENSG00000008130,ENSG00000004455,ENSG00000106348,ENSG00000047230,ENSG00000067225
GO:0042306	regulation of protein import into nucleus	biological_process	0.01914	0.54504	11	1033	102	19500	ENSG00000186642,ENSG00000187446,ENSG00000102898,ENSG00000096384,ENSG00000138757,ENSG00000068001,ENSG00000146232,ENSG00000157110,ENSG00000176973,ENSG00000105647,ENSG00000079999
GO:0001909	leukocyte mediated cytotoxicity	biological_process	0.019169	0.54504	10	1033	89	19500	ENSG00000141480,ENSG00000102879,ENSG00000129465,ENSG00000196230,ENSG00000204516,ENSG00000090339,ENSG00000141968,ENSG00000026751,ENSG00000172232,ENSG00000096996
GO:0002029	desensitization of G-protein coupled receptor protein signaling pathway	biological_process	0.019214	0.54504	4	1033	20	19500	ENSG00000106976,ENSG00000141480,ENSG00000079805,ENSG00000173020
GO:0022401	negative adaptation of signaling pathway	biological_process	0.019214	0.54504	4	1033	20	19500	ENSG00000173020,ENSG00000079805,ENSG00000141480,ENSG00000106976
GO:0070932	histone H3 deacetylation	biological_process	0.019224	0.54504	4	1033	20	19500	ENSG00000061273,ENSG00000068903,ENSG00000077463,ENSG00000108840
GO:1901679	nucleotide transmembrane transport	biological_process	0.019228	0.54504	4	1033	20	19500	ENSG00000181830,ENSG00000157593,ENSG00000102100,ENSG00000176087
GO:0034220	ion transmembrane transport	biological_process	0.019254	0.54504	69	1033	1014	19500	ENSG00000142959,ENSG00000174871,ENSG00000006695,ENSG00000184014,ENSG00000014216,ENSG00000173826,ENSG00000122986,ENSG00000156026,ENSG00000107745,ENSG00000076555,ENSG00000126267,ENSG00000143570,ENSG00000137275,ENSG00000172939,ENSG00000141837,ENSG00000117410,ENSG00000087088,ENSG00000136802,ENSG00000177542,ENSG00000171130,ENSG00000104783,ENSG00000120899,ENSG00000139890,ENSG00000100991,ENSG00000165125…
GO:0044463	cell projection part	cellular_component	0.019365	0.54712	70	1033	1031	19500	ENSG00000168081,ENSG00000132881,ENSG00000113758,ENSG00000159445,ENSG00000096384,ENSG00000078369,ENSG00000158555,ENSG00000113742,ENSG00000214021,ENSG00000140474,ENSG00000175866,ENSG00000007174,ENSG00000069424,ENSG00000160014,ENSG00000181790,ENSG00000158321,ENSG00000149571,ENSG00000167614,ENSG00000187486,ENSG00000187535,ENSG00000079805,ENSG00000106976,ENSG00000151208,ENSG00000166963,ENSG00000136717…
GO:0070663	regulation of leukocyte proliferation	biological_process	0.019403	0.54712	19	1033	214	19500	ENSG00000102879,ENSG00000013725,ENSG00000186827,ENSG00000125347,ENSG00000160685,ENSG00000071051,ENSG00000110651,ENSG00000096996,ENSG00000105639,ENSG00000168918,ENSG00000240505,ENSG00000129465,ENSG00000175505,ENSG00000167851,ENSG00000130427,ENSG00000151208,ENSG00000168071,ENSG00000084207,ENSG00000172936
GO:0030262	apoptotic nuclear changes	biological_process	0.019405	0.54712	5	1033	30	19500	ENSG00000160570,ENSG00000100813,ENSG00000179526,ENSG00000189060,ENSG00000087088
GO:0009303	rRNA transcription	biological_process	0.019497	0.54848	5	1033	30	19500	ENSG00000158796,ENSG00000013573,ENSG00000113648,ENSG00000185024,ENSG00000166986
GO:0051098	regulation of binding	biological_process	0.019512	0.54848	27	1033	334	19500	ENSG00000101109,ENSG00000011422,ENSG00000108840,ENSG00000087586,ENSG00000148143,ENSG00000160014,ENSG00000075413,ENSG00000141480,ENSG00000164362,ENSG00000087274,ENSG00000213923,ENSG00000167110,ENSG00000084764,ENSG00000148737,ENSG00000096384,ENSG00000166851,ENSG00000013573,ENSG00000116670,ENSG00000204435,ENSG00000184900,ENSG00000102882,ENSG00000123384,ENSG00000087088,ENSG00000068903,ENSG00000167895…
GO:0031312	extrinsic component of organelle membrane	cellular_component	0.01953	0.54848	5	1033	30	19500	ENSG00000177169,ENSG00000140464,ENSG00000165861,ENSG00000136710,ENSG00000167302
GO:0019985	translesion synthesis	biological_process	0.019943	0.55933	6	1033	41	19500	ENSG00000077514,ENSG00000156587,ENSG00000170315,ENSG00000175482,ENSG00000116670,ENSG00000049541
GO:0032420	stereocilium	cellular_component	0.019988	0.55982	6	1033	41	19500	ENSG00000144488,ENSG00000109083,ENSG00000197879,ENSG00000176058,ENSG00000177106,ENSG00000155366
GO:0000096	sulfur amino acid metabolic process	biological_process	0.020017	0.55982	6	1033	41	19500	ENSG00000124713,ENSG00000108578,ENSG00000141837,ENSG00000128311,ENSG00000128309,ENSG00000172482
GO:0071312	cellular response to alkaloid	biological_process	0.02004	0.55982	6	1033	41	19500	ENSG00000187486,ENSG00000204371,ENSG00000171552,ENSG00000173039,ENSG00000197299,ENSG00000090339
GO:1903650	negative regulation of cytoplasmic transport	biological_process	0.02026	0.56522	9	1033	77	19500	ENSG00000138757,ENSG00000100401,ENSG00000146232,ENSG00000187446,ENSG00000186642,ENSG00000135506,ENSG00000130427,ENSG00000079999,ENSG00000176973
GO:0002443	leukocyte mediated immunity	biological_process	0.020359	0.56625	59	1033	850	19500	ENSG00000011422,ENSG00000169692,ENSG00000015285,ENSG00000143546,ENSG00000105639,ENSG00000067225,ENSG00000096996,ENSG00000168918,ENSG00000213658,ENSG00000102879,ENSG00000244038,ENSG00000170909,ENSG00000090339,ENSG00000086730,ENSG00000143621,ENSG00000116815,ENSG00000185627,ENSG00000116670,ENSG00000136279,ENSG00000051523,ENSG00000100321,ENSG00000128322,ENSG00000204435,ENSG00000175505,ENSG00000204516…
GO:0043130	ubiquitin binding	molecular_function	0.020423	0.56625	11	1033	103	19500	ENSG00000068903,ENSG00000135924,ENSG00000156587,ENSG00000160948,ENSG00000158062,ENSG00000167770,ENSG00000133612,ENSG00000154473,ENSG00000179526,ENSG00000125826,ENSG00000160803
GO:0051056	regulation of small GTPase mediated signal transduction	biological_process	0.020427	0.56625	26	1033	320	19500	ENSG00000127533,ENSG00000099331,ENSG00000089820,ENSG00000130427,ENSG00000107862,ENSG00000198915,ENSG00000053524,ENSG00000155366,ENSG00000141968,ENSG00000120318,ENSG00000100092,ENSG00000180448,ENSG00000130052,ENSG00000071205,ENSG00000079805,ENSG00000146005,ENSG00000133216,ENSG00000174775,ENSG00000132694,ENSG00000105647,ENSG00000158321,ENSG00000124313,ENSG00000182957,ENSG00000197283,ENSG00000141522…
GO:0006900	membrane budding	biological_process	0.020441	0.56625	13	1033	130	19500	ENSG00000114745,ENSG00000174871,ENSG00000162236,ENSG00000042753,ENSG00000162517,ENSG00000167110,ENSG00000106976,ENSG00000054116,ENSG00000148356,ENSG00000107862,ENSG00000130475,ENSG00000160948,ENSG00000141551
GO:0071478	cellular response to radiation	biological_process	0.020463	0.56625	16	1033	172	19500	ENSG00000087088,ENSG00000078369,ENSG00000171552,ENSG00000188486,ENSG00000048028,ENSG00000079805,ENSG00000051523,ENSG00000068001,ENSG00000197299,ENSG00000175854,ENSG00000174775,ENSG00000181218,ENSG00000132518,ENSG00000213145,ENSG00000185527,ENSG00000258839
GO:0046364	monosaccharide biosynthetic process	biological_process	0.020519	0.56625	10	1033	90	19500	ENSG00000160211,ENSG00000111669,ENSG00000149639,ENSG00000131871,ENSG00000117448,ENSG00000124713,ENSG00000108515,ENSG00000160741,ENSG00000145214,ENSG00000149925
GO:0010639	negative regulation of organelle organization	biological_process	0.020554	0.56625	28	1033	351	19500	ENSG00000139437,ENSG00000160789,ENSG00000107077,ENSG00000113648,ENSG00000015285,ENSG00000160803,ENSG00000042493,ENSG00000100300,ENSG00000087274,ENSG00000100151,ENSG00000257949,ENSG00000108518,ENSG00000102879,ENSG00000141480,ENSG00000079805,ENSG00000071539,ENSG00000185324,ENSG00000116670,ENSG00000167770,ENSG00000137309,ENSG00000166851,ENSG00000154473,ENSG00000171100,ENSG00000204371,ENSG00000171552…
GO:0007568	aging	biological_process	0.020555	0.56625	25	1033	305	19500	ENSG00000108515,ENSG00000174775,ENSG00000105327,ENSG00000072310,ENSG00000090339,ENSG00000164362,ENSG00000100300,ENSG00000167468,ENSG00000170345,ENSG00000168918,ENSG00000160789,ENSG00000130522,ENSG00000140474,ENSG00000090238,ENSG00000188486,ENSG00000123384,ENSG00000130427,ENSG00000173039,ENSG00000179583,ENSG00000140464,ENSG00000137309,ENSG00000134013,ENSG00000149131,ENSG00000198909,ENSG00000068001
GO:0008081	phosphoric diester hydrolase activity	molecular_function	0.020558	0.56625	10	1033	90	19500	ENSG00000006007,ENSG00000103056,ENSG00000078369,ENSG00000158555,ENSG00000136699,ENSG00000185527,ENSG00000186642,ENSG00000149782,ENSG00000129219,ENSG00000149527
GO:0010035	response to inorganic substance	biological_process	0.020563	0.56625	40	1033	540	19500	ENSG00000087274,ENSG00000197299,ENSG00000165915,ENSG00000100300,ENSG00000011485,ENSG00000090339,ENSG00000120049,ENSG00000215021,ENSG00000143546,ENSG00000120899,ENSG00000137496,ENSG00000170345,ENSG00000165125,ENSG00000122359,ENSG00000013573,ENSG00000079805,ENSG00000163930,ENSG00000106462,ENSG00000134013,ENSG00000108786,ENSG00000162517,ENSG00000135124,ENSG00000160211,ENSG00000171121,ENSG00000164362…
GO:0006807	nitrogen compound metabolic process	biological_process	0.020598	0.56648	404	1033	7036	19500	ENSG00000141837,ENSG00000157349,ENSG00000137309,ENSG00000101266,ENSG00000171703,ENSG00000183655,ENSG00000127415,ENSG00000142252,ENSG00000159788,ENSG00000175787,ENSG00000198563,ENSG00000112759,ENSG00000113068,ENSG00000180549,ENSG00000067596,ENSG00000006695,ENSG00000071051,ENSG00000160691,ENSG00000004455,ENSG00000100151,ENSG00000163346,ENSG00000175854,ENSG00000132694,ENSG00000084764,ENSG00000132507…
GO:0050767	regulation of neurogenesis	biological_process	0.020682	0.56804	52	1033	735	19500	ENSG00000085733,ENSG00000166145,ENSG00000184014,ENSG00000141522,ENSG00000175866,ENSG00000112655,ENSG00000198825,ENSG00000107077,ENSG00000130175,ENSG00000071054,ENSG00000133216,ENSG00000068971,ENSG00000164362,ENSG00000165699,ENSG00000071127,ENSG00000141837,ENSG00000113758,ENSG00000114745,ENSG00000172757,ENSG00000165802,ENSG00000088899,ENSG00000089820,ENSG00000158555,ENSG00000173039,ENSG00000135916…
GO:0006873	cellular ion homeostasis	biological_process	0.020834	0.57148	44	1033	605	19500	ENSG00000165125,ENSG00000154118,ENSG00000187446,ENSG00000178719,ENSG00000197043,ENSG00000120899,ENSG00000127129,ENSG00000085872,ENSG00000143546,ENSG00000184381,ENSG00000187045,ENSG00000183172,ENSG00000105327,ENSG00000102879,ENSG00000083454,ENSG00000165915,ENSG00000135124,ENSG00000136710,ENSG00000139832,ENSG00000051523,ENSG00000108953,ENSG00000050426,ENSG00000130427,ENSG00000140464,ENSG00000145740…
GO:0070228	regulation of lymphocyte apoptotic process	biological_process	0.021037	0.5763	7	1033	53	19500	ENSG00000087088,ENSG00000157514,ENSG00000105639,ENSG00000129465,ENSG00000169242,ENSG00000105327,ENSG00000166925
GO:0006325	chromatin organization	biological_process	0.021369	0.58465	53	1033	753	19500	ENSG00000043143,ENSG00000185499,ENSG00000013573,ENSG00000139613,ENSG00000160741,ENSG00000163930,ENSG00000106462,ENSG00000134013,ENSG00000105011,ENSG00000111642,ENSG00000068903,ENSG00000061273,ENSG00000172534,ENSG00000188486,ENSG00000165702,ENSG00000011243,ENSG00000087586,ENSG00000122390,ENSG00000203814,ENSG00000204227,ENSG00000072310,ENSG00000011485,ENSG00000167548,ENSG00000160685,ENSG00000130165…
GO:0048872	homeostasis of number of cells	biological_process	0.021552	0.58888	21	1033	246	19500	ENSG00000130427,ENSG00000129465,ENSG00000087088,ENSG00000240505,ENSG00000100813,ENSG00000056586,ENSG00000163930,ENSG00000122641,ENSG00000106462,ENSG00000198945,ENSG00000127528,ENSG00000160211,ENSG00000137078,ENSG00000087274,ENSG00000102879,ENSG00000166925,ENSG00000157514,ENSG00000105639,ENSG00000138326,ENSG00000168918,ENSG00000213658
GO:1903409	reactive oxygen species biosynthetic process	biological_process	0.021712	0.5925	11	1033	104	19500	ENSG00000051523,ENSG00000120899,ENSG00000079805,ENSG00000096384,ENSG00000181790,ENSG00000137880,ENSG00000127528,ENSG00000135124,ENSG00000107862,ENSG00000090339,ENSG00000100300
GO:0016477	cell migration	biological_process	0.021839	0.59456	94	1033	1446	19500	ENSG00000123384,ENSG00000176170,ENSG00000169242,ENSG00000176973,ENSG00000198909,ENSG00000197879,ENSG00000128322,ENSG00000116815,ENSG00000135124,ENSG00000123159,ENSG00000100092,ENSG00000039523,ENSG00000164050,ENSG00000102879,ENSG00000146674,ENSG00000120899,ENSG00000108798,ENSG00000182957,ENSG00000105639,ENSG00000143546,ENSG00000157227,ENSG00000196588,ENSG00000087088,ENSG00000089820,ENSG00000073060…
GO:0043433	negative regulation of sequence-specific DNA binding transcription factor activity	biological_process	0.021844	0.59456	14	1033	145	19500	ENSG00000141480,ENSG00000079999,ENSG00000186827,ENSG00000149600,ENSG00000148737,ENSG00000125826,ENSG00000105298,ENSG00000187446,ENSG00000106462,ENSG00000120057,ENSG00000142405,ENSG00000215021,ENSG00000116670,ENSG00000196924
GO:0051341	regulation of oxidoreductase activity	biological_process	0.021973	0.59733	10	1033	91	19500	ENSG00000164362,ENSG00000129465,ENSG00000073060,ENSG00000127948,ENSG00000114353,ENSG00000127129,ENSG00000079805,ENSG00000120899,ENSG00000160014,ENSG00000051523
GO:0009394	2'-deoxyribonucleotide metabolic process	biological_process	0.022169	0.60187	5	1033	31	19500	ENSG00000129071,ENSG00000275074,ENSG00000125458,ENSG00000205309,ENSG00000143774
GO:0016417	S-acyltransferase activity	molecular_function	0.022299	0.6028	5	1033	31	19500	ENSG00000099904,ENSG00000147533,ENSG00000163812,ENSG00000156599,ENSG00000160446
GO:0010799	regulation of peptidyl-threonine phosphorylation	biological_process	0.022356	0.6028	6	1033	42	19500	ENSG00000176170,ENSG00000160014,ENSG00000172232,ENSG00000068903,ENSG00000145214,ENSG00000166851
GO:0090311	regulation of protein deacetylation	biological_process	0.022361	0.6028	6	1033	42	19500	ENSG00000102409,ENSG00000160685,ENSG00000168522,ENSG00000072310,ENSG00000011243,ENSG00000158941
GO:0008017	microtubule binding	molecular_function	0.022453	0.6028	22	1033	262	19500	ENSG00000141933,ENSG00000106976,ENSG00000084764,ENSG00000167110,ENSG00000166851,ENSG00000197879,ENSG00000079805,ENSG00000149499,ENSG00000099331,ENSG00000166963,ENSG00000100242,ENSG00000137497,ENSG00000168071,ENSG00000185340,ENSG00000142945,ENSG00000187446,ENSG00000196169,ENSG00000168522,ENSG00000143546,ENSG00000011485,ENSG00000129680,ENSG00000126216
GO:0009223	pyrimidine deoxyribonucleotide catabolic process	biological_process	0.022636	0.6028	3	1033	12	19500	ENSG00000129071,ENSG00000125458,ENSG00000205309
GO:0009059	macromolecule biosynthetic process	biological_process	0.022672	0.6028	305	1033	5221	19500	ENSG00000130165,ENSG00000196275,ENSG00000167548,ENSG00000011485,ENSG00000131871,ENSG00000099998,ENSG00000160993,ENSG00000105639,ENSG00000006194,ENSG00000196428,ENSG00000068903,ENSG00000130427,ENSG00000198715,ENSG00000100207,ENSG00000135899,ENSG00000110801,ENSG00000174586,ENSG00000117682,ENSG00000121578,ENSG00000125970,ENSG00000005075,ENSG00000132510,ENSG00000102882,ENSG00000166526,ENSG00000173039…
GO:0009264	deoxyribonucleotide catabolic process	biological_process	0.022685	0.6028	4	1033	21	19500	ENSG00000125458,ENSG00000275074,ENSG00000129071,ENSG00000205309
GO:0015937	coenzyme A biosynthetic process	biological_process	0.022689	0.6028	3	1033	12	19500	ENSG00000172992,ENSG00000138621,ENSG00000076555
GO:1903020	positive regulation of glycoprotein metabolic process	biological_process	0.02269	0.6028	4	1033	21	19500	ENSG00000132329,ENSG00000167110,ENSG00000148737,ENSG00000187446
GO:0010038	response to metal ion	biological_process	0.0227	0.6028	28	1033	354	19500	ENSG00000108786,ENSG00000134013,ENSG00000135124,ENSG00000162517,ENSG00000125648,ENSG00000102882,ENSG00000130522,ENSG00000122359,ENSG00000170345,ENSG00000145740,ENSG00000165125,ENSG00000160014,ENSG00000213145,ENSG00000120049,ENSG00000215021,ENSG00000143546,ENSG00000125148,ENSG00000120899,ENSG00000197586,ENSG00000171121,ENSG00000087274,ENSG00000160211,ENSG00000011485,ENSG00000165915,ENSG00000164362…
GO:0036513	Derlin-1 retrotranslocation complex	cellular_component	0.022729	0.6028	3	1033	12	19500	ENSG00000101294,ENSG00000131871,ENSG00000162298
GO:0006809	nitric oxide biosynthetic process	biological_process	0.02274	0.6028	8	1033	66	19500	ENSG00000090339,ENSG00000100300,ENSG00000135124,ENSG00000137880,ENSG00000127528,ENSG00000096384,ENSG00000120899,ENSG00000079805
GO:0051000	positive regulation of nitric-oxide synthase activity	biological_process	0.022763	0.6028	4	1033	21	19500	ENSG00000073060,ENSG00000160014,ENSG00000120899,ENSG00000164362
GO:0090042	tubulin deacetylation	biological_process	0.022767	0.6028	3	1033	12	19500	ENSG00000168522,ENSG00000068903,ENSG00000102409
GO:2000052	positive regulation of non-canonical Wnt signaling pathway	biological_process	0.022768	0.6028	3	1033	12	19500	ENSG00000213923,ENSG00000135299,ENSG00000141551
GO:1901642	nucleoside transmembrane transport	biological_process	0.022768	0.6028	3	1033	12	19500	ENSG00000198246,ENSG00000157593,ENSG00000112759
GO:0032269	negative regulation of cellular protein metabolic process	biological_process	0.022769	0.6028	76	1033	1141	19500	ENSG00000204673,ENSG00000140564,ENSG00000140464,ENSG00000108953,ENSG00000166963,ENSG00000136717,ENSG00000128563,ENSG00000071539,ENSG00000214517,ENSG00000173933,ENSG00000100300,ENSG00000105647,ENSG00000005007,ENSG00000120875,ENSG00000114353,ENSG00000142405,ENSG00000070770,ENSG00000138835,ENSG00000104852,ENSG00000011422,ENSG00000167851,ENSG00000113742,ENSG00000099991,ENSG00000068001,ENSG00000167770…
GO:0070243	regulation of thymocyte apoptotic process	biological_process	0.022771	0.6028	3	1033	12	19500	ENSG00000105639,ENSG00000105327,ENSG00000169242
GO:0045342	MHC class II biosynthetic process	biological_process	0.022771	0.6028	3	1033	12	19500	ENSG00000086102,ENSG00000179583,ENSG00000172232
GO:0038110	interleukin-2-mediated signaling pathway	biological_process	0.022771	0.6028	3	1033	12	19500	ENSG00000120899,ENSG00000160691,ENSG00000105639
GO:0008277	regulation of G-protein coupled receptor protein signaling pathway	biological_process	0.022882	0.60498	13	1033	132	19500	ENSG00000122679,ENSG00000185527,ENSG00000108262,ENSG00000106976,ENSG00000145214,ENSG00000138835,ENSG00000173020,ENSG00000079805,ENSG00000198055,ENSG00000132518,ENSG00000141480,ENSG00000159788,ENSG00000132329
GO:0051282	regulation of sequestering of calcium ion	biological_process	0.023162	0.61164	11	1033	105	19500	ENSG00000087088,ENSG00000105327,ENSG00000102879,ENSG00000127533,ENSG00000160014,ENSG00000051523,ENSG00000131504,ENSG00000085872,ENSG00000120899,ENSG00000125648,ENSG00000154118
GO:1904589	regulation of protein import	biological_process	0.023234	0.61278	11	1033	105	19500	ENSG00000146232,ENSG00000068001,ENSG00000138757,ENSG00000096384,ENSG00000187446,ENSG00000186642,ENSG00000102898,ENSG00000079999,ENSG00000105647,ENSG00000176973,ENSG00000157110
GO:1902533	positive regulation of intracellular signal transduction	biological_process	0.023284	0.61332	69	1033	1024	19500	ENSG00000011485,ENSG00000146674,ENSG00000164050,ENSG00000143546,ENSG00000120899,ENSG00000167965,ENSG00000175505,ENSG00000130427,ENSG00000176170,ENSG00000188186,ENSG00000169242,ENSG00000136279,ENSG00000198909,ENSG00000122679,ENSG00000135124,ENSG00000141506,ENSG00000141480,ENSG00000160691,ENSG00000185527,ENSG00000071051,ENSG00000129465,ENSG00000173039,ENSG00000087088,ENSG00000102882,ENSG00000135299…
GO:0050896	response to stimulus	biological_process	0.023334	0.61336	508	1033	8994	19500	ENSG00000196235,ENSG00000049541,ENSG00000160014,ENSG00000102908,ENSG00000163945,ENSG00000149925,ENSG00000126247,ENSG00000108840,ENSG00000181790,ENSG00000135365,ENSG00000064313,ENSG00000143393,ENSG00000101425,ENSG00000103148,ENSG00000196498,ENSG00000120903,ENSG00000160360,ENSG00000125648,ENSG00000172232,ENSG00000068001,ENSG00000165804,ENSG00000165821,ENSG00000185482,ENSG00000125952,ENSG00000133246…
GO:0019898	extrinsic component of membrane	cellular_component	0.023343	0.61336	22	1033	263	19500	ENSG00000105639,ENSG00000069424,ENSG00000120899,ENSG00000177169,ENSG00000114353,ENSG00000011422,ENSG00000167302,ENSG00000105647,ENSG00000165861,ENSG00000052344,ENSG00000196998,ENSG00000172232,ENSG00000185482,ENSG00000141506,ENSG00000136710,ENSG00000100139,ENSG00000140464,ENSG00000078369,ENSG00000137497,ENSG00000102225,ENSG00000125449,ENSG00000167671
GO:0048878	chemical homeostasis	biological_process	0.023423	0.61471	72	1033	1075	19500	ENSG00000051523,ENSG00000160741,ENSG00000140464,ENSG00000050426,ENSG00000108953,ENSG00000184381,ENSG00000187045,ENSG00000127129,ENSG00000114353,ENSG00000085872,ENSG00000197043,ENSG00000154118,ENSG00000107331,ENSG00000105647,ENSG00000100300,ENSG00000083454,ENSG00000090339,ENSG00000105327,ENSG00000054356,ENSG00000068001,ENSG00000185825,ENSG00000125648,ENSG00000158773,ENSG00000084207,ENSG00000148737…
GO:0042119	neutrophil activation	biological_process	0.023517	0.61475	37	1033	497	19500	ENSG00000172057,ENSG00000131504,ENSG00000106348,ENSG00000069424,ENSG00000106244,ENSG00000014216,ENSG00000149925,ENSG00000064601,ENSG00000167613,ENSG00000147533,ENSG00000122986,ENSG00000124570,ENSG00000101425,ENSG00000180448,ENSG00000172232,ENSG00000084207,ENSG00000096384,ENSG00000167851,ENSG00000164687,ENSG00000133246,ENSG00000196743,ENSG00000005844,ENSG00000143546,ENSG00000067225,ENSG00000011422…
GO:0001738	morphogenesis of a polarized epithelium	biological_process	0.023529	0.61475	10	1033	92	19500	ENSG00000112655,ENSG00000071127,ENSG00000109083,ENSG00000100092,ENSG00000042753,ENSG00000151208,ENSG00000161203,ENSG00000108518,ENSG00000135299,ENSG00000141480
GO:0051983	regulation of chromosome segregation	biological_process	0.023573	0.61475	10	1033	92	19500	ENSG00000110200,ENSG00000137497,ENSG00000068903,ENSG00000154473,ENSG00000166851,ENSG00000142945,ENSG00000116670,ENSG00000013573,ENSG00000113648,ENSG00000071539
GO:0048010	vascular endothelial growth factor receptor signaling pathway	biological_process	0.023595	0.61475	10	1033	92	19500	ENSG00000175866,ENSG00000120899,ENSG00000051523,ENSG00000071051,ENSG00000141968,ENSG00000105647,ENSG00000027869,ENSG00000062598,ENSG00000107338,ENSG00000114738
GO:0009119	ribonucleoside metabolic process	biological_process	0.023988	0.61475	30	1033	387	19500	ENSG00000213619,ENSG00000140990,ENSG00000138621,ENSG00000102125,ENSG00000170906,ENSG00000125648,ENSG00000172992,ENSG00000124713,ENSG00000111669,ENSG00000077463,ENSG00000149925,ENSG00000006695,ENSG00000157593,ENSG00000008130,ENSG00000004455,ENSG00000106348,ENSG00000047230,ENSG00000067225,ENSG00000275074,ENSG00000106992,ENSG00000108515,ENSG00000167792,ENSG00000100298,ENSG00000076555,ENSG00000100300…
GO:0046578	regulation of Ras protein signal transduction	biological_process	0.02403	0.61475	19	1033	219	19500	ENSG00000146005,ENSG00000133216,ENSG00000174775,ENSG00000158321,ENSG00000132694,ENSG00000124313,ENSG00000182957,ENSG00000177106,ENSG00000141522,ENSG00000197283,ENSG00000127533,ENSG00000099331,ENSG00000198915,ENSG00000053524,ENSG00000130427,ENSG00000107862,ENSG00000120318,ENSG00000141968,ENSG00000079805
GO:0006486	protein glycosylation	biological_process	0.024114	0.61475	23	1033	279	19500	ENSG00000176383,ENSG00000160408,ENSG00000077463,ENSG00000068903,ENSG00000132329,ENSG00000162298,ENSG00000185499,ENSG00000090581,ENSG00000114745,ENSG00000115525,ENSG00000167110,ENSG00000167889,ENSG00000165905,ENSG00000158089,ENSG00000117682,ENSG00000244038,ENSG00000110080,ENSG00000131446,ENSG00000130175,ENSG00000121578,ENSG00000187446,ENSG00000126091,ENSG00000180549
GO:0043413	macromolecule glycosylation	biological_process	0.024114	0.61475	23	1033	279	19500	ENSG00000114745,ENSG00000115525,ENSG00000185499,ENSG00000090581,ENSG00000162298,ENSG00000165905,ENSG00000167889,ENSG00000167110,ENSG00000077463,ENSG00000132329,ENSG00000068903,ENSG00000160408,ENSG00000176383,ENSG00000130175,ENSG00000131446,ENSG00000126091,ENSG00000180549,ENSG00000187446,ENSG00000121578,ENSG00000158089,ENSG00000117682,ENSG00000110080,ENSG00000244038
GO:0043065	positive regulation of apoptotic process	biological_process	0.024161	0.61475	44	1033	611	19500	ENSG00000068903,ENSG00000140464,ENSG00000171552,ENSG00000124664,ENSG00000130725,ENSG00000108953,ENSG00000136717,ENSG00000079805,ENSG00000122641,ENSG00000120949,ENSG00000143382,ENSG00000172667,ENSG00000142330,ENSG00000125826,ENSG00000158941,ENSG00000100300,ENSG00000146674,ENSG00000105327,ENSG00000062524,ENSG00000184381,ENSG00000142405,ENSG00000143546,ENSG00000168918,ENSG00000011422,ENSG00000170315…
GO:0016049	cell growth	biological_process	0.024197	0.61475	36	1033	482	19500	ENSG00000140464,ENSG00000135924,ENSG00000176170,ENSG00000124772,ENSG00000051523,ENSG00000116670,ENSG00000043143,ENSG00000079805,ENSG00000122641,ENSG00000163930,ENSG00000146674,ENSG00000164050,ENSG00000158941,ENSG00000167548,ENSG00000143546,ENSG00000157227,ENSG00000139437,ENSG00000087586,ENSG00000120899,ENSG00000167895,ENSG00000077463,ENSG00000089820,ENSG00000198563,ENSG00000096384,ENSG00000213619…
GO:0051028	mRNA transport	biological_process	0.024243	0.61475	14	1033	147	19500	ENSG00000082898,ENSG00000157349,ENSG00000132507,ENSG00000102898,ENSG00000205323,ENSG00000197879,ENSG00000063244,ENSG00000116350,ENSG00000011243,ENSG00000138757,ENSG00000005007,ENSG00000162385,ENSG00000014164,ENSG00000198563
GO:0060341	regulation of cellular localization	biological_process	0.024328	0.61475	83	1033	1264	19500	ENSG00000114353,ENSG00000184381,ENSG00000011243,ENSG00000146232,ENSG00000142405,ENSG00000070770,ENSG00000102898,ENSG00000072310,ENSG00000083454,ENSG00000186827,ENSG00000107331,ENSG00000105647,ENSG00000103056,ENSG00000105327,ENSG00000122641,ENSG00000163930,ENSG00000173933,ENSG00000051523,ENSG00000106976,ENSG00000186642,ENSG00000142330,ENSG00000140464,ENSG00000107862,ENSG00000171552,ENSG00000108953…
GO:1901657	glycosyl compound metabolic process	biological_process	0.024533	0.61475	33	1033	435	19500	ENSG00000124713,ENSG00000102125,ENSG00000140990,ENSG00000172992,ENSG00000106992,ENSG00000130414,ENSG00000205309,ENSG00000100300,ENSG00000143774,ENSG00000241837,ENSG00000182199,ENSG00000125458,ENSG00000067225,ENSG00000047230,ENSG00000111669,ENSG00000166548,ENSG00000077463,ENSG00000170906,ENSG00000138621,ENSG00000213619,ENSG00000125648,ENSG00000167792,ENSG00000108515,ENSG00000275074,ENSG00000076555…
GO:0009896	positive regulation of catabolic process	biological_process	0.024628	0.61475	29	1033	372	19500	ENSG00000110651,ENSG00000148356,ENSG00000112561,ENSG00000087586,ENSG00000120899,ENSG00000196235,ENSG00000162236,ENSG00000177169,ENSG00000005007,ENSG00000165699,ENSG00000213923,ENSG00000100083,ENSG00000072609,ENSG00000125447,ENSG00000166851,ENSG00000168397,ENSG00000101266,ENSG00000185825,ENSG00000160360,ENSG00000110931,ENSG00000102882,ENSG00000160948,ENSG00000141551,ENSG00000068903,ENSG00000079999…
GO:0006664	glycolipid metabolic process	biological_process	0.024676	0.61475	11	1033	106	19500	ENSG00000115525,ENSG00000007541,ENSG00000165282,ENSG00000136699,ENSG00000064601,ENSG00000119227,ENSG00000160408,ENSG00000087088,ENSG00000108474,ENSG00000196743,ENSG00000110080
GO:0018205	peptidyl-lysine modification	biological_process	0.024686	0.61475	27	1033	341	19500	ENSG00000184900,ENSG00000132952,ENSG00000102882,ENSG00000172534,ENSG00000061273,ENSG00000163884,ENSG00000173039,ENSG00000068903,ENSG00000135441,ENSG00000204371,ENSG00000187778,ENSG00000134013,ENSG00000106462,ENSG00000160741,ENSG00000185499,ENSG00000043143,ENSG00000284753,ENSG00000127948,ENSG00000135100,ENSG00000167548,ENSG00000158321,ENSG00000080603,ENSG00000141696,ENSG00000122390,ENSG00000185917…
GO:0023052	signaling	biological_process	0.024705	0.61475	374	1033	6501	19500	ENSG00000064313,ENSG00000143393,ENSG00000103148,ENSG00000160014,ENSG00000143740,ENSG00000102908,ENSG00000181790,ENSG00000163945,ENSG00000062598,ENSG00000158555,ENSG00000133246,ENSG00000056586,ENSG00000068001,ENSG00000172232,ENSG00000165804,ENSG00000120903,ENSG00000185482,ENSG00000165821,ENSG00000204264,ENSG00000105647,ENSG00000054356,ENSG00000142733,ENSG00000137843,ENSG00000184381,ENSG00000177106…
GO:0070227	lymphocyte apoptotic process	biological_process	0.024709	0.61475	8	1033	67	19500	ENSG00000166925,ENSG00000105327,ENSG00000169242,ENSG00000129465,ENSG00000087088,ENSG00000137275,ENSG00000157514,ENSG00000105639
GO:0022402	cell cycle process	biological_process	0.024722	0.61475	83	1033	1265	19500	ENSG00000087586,ENSG00000160993,ENSG00000142945,ENSG00000011451,ENSG00000167965,ENSG00000183484,ENSG00000182134,ENSG00000167797,ENSG00000158941,ENSG00000125347,ENSG00000106992,ENSG00000007237,ENSG00000173715,ENSG00000116670,ENSG00000185499,ENSG00000185627,ENSG00000123159,ENSG00000072609,ENSG00000266173,ENSG00000068903,ENSG00000122359,ENSG00000166508,ENSG00000188186,ENSG00000160789,ENSG00000088325…
GO:0033613	activating transcription factor binding	molecular_function	0.024752	0.61475	8	1033	67	19500	ENSG00000061273,ENSG00000179583,ENSG00000173039,ENSG00000172534,ENSG00000116670,ENSG00000168874,ENSG00000145214,ENSG00000170345
GO:0050670	regulation of lymphocyte proliferation	biological_process	0.024794	0.61475	18	1033	205	19500	ENSG00000172936,ENSG00000240505,ENSG00000130427,ENSG00000129465,ENSG00000167851,ENSG00000175505,ENSG00000168071,ENSG00000151208,ENSG00000110651,ENSG00000071051,ENSG00000105639,ENSG00000096996,ENSG00000168918,ENSG00000102879,ENSG00000013725,ENSG00000125347,ENSG00000186827,ENSG00000160685
GO:0050544	arachidonic acid binding	molecular_function	0.024805	0.61475	2	1033	5	19500	ENSG00000143546,ENSG00000166900
GO:1903439	calcitonin family receptor complex	cellular_component	0.02483	0.61475	2	1033	5	19500	ENSG00000132329,ENSG00000122679
GO:1903573	negative regulation of response to endoplasmic reticulum stress	biological_process	0.02484	0.61475	6	1033	43	19500	ENSG00000162298,ENSG00000131871,ENSG00000135506,ENSG00000149428,ENSG00000178719,ENSG00000071051
GO:0033173	calcineurin-NFAT signaling cascade	biological_process	0.024855	0.61475	6	1033	43	19500	ENSG00000187446,ENSG00000085872,ENSG00000065361,ENSG00000121753,ENSG00000131196,ENSG00000102908
GO:0031122	cytoplasmic microtubule organization	biological_process	0.024855	0.61475	6	1033	43	19500	ENSG00000126216,ENSG00000196169,ENSG00000137497,ENSG00000168071,ENSG00000187446,ENSG00000037042
GO:1902525	regulation of protein monoubiquitination	biological_process	0.024855	0.61475	2	1033	5	19500	ENSG00000170315,ENSG00000162517
GO:0031175	neuron projection development	biological_process	0.024863	0.61475	61	1033	893	19500	ENSG00000068971,ENSG00000167461,ENSG00000133216,ENSG00000196405,ENSG00000258947,ENSG00000149571,ENSG00000165699,ENSG00000011009,ENSG00000158321,ENSG00000213171,ENSG00000181790,ENSG00000184014,ENSG00000085733,ENSG00000071051,ENSG00000071054,ENSG00000130175,ENSG00000175866,ENSG00000160691,ENSG00000112655,ENSG00000141522,ENSG00000177169,ENSG00000198825,ENSG00000172757,ENSG00000165802,ENSG00000102225…
GO:0051434	BH3 domain binding	molecular_function	0.024928	0.61475	2	1033	5	19500	ENSG00000087088,ENSG00000171552
GO:0019103	pyrimidine nucleotide binding	molecular_function	0.024977	0.61475	2	1033	5	19500	ENSG00000125458,ENSG00000096384
GO:0002457	T cell antigen processing and presentation	biological_process	0.025	0.61475	2	1033	5	19500	ENSG00000015285,ENSG00000090339
GO:2000630	positive regulation of miRNA metabolic process	biological_process	0.025032	0.61475	2	1033	5	19500	ENSG00000174775,ENSG00000173039
GO:0097039	protein linear polyubiquitination	biological_process	0.025067	0.61475	2	1033	5	19500	ENSG00000179526,ENSG00000125826
GO:0043625	delta DNA polymerase complex	cellular_component	0.025128	0.61475	2	1033	5	19500	ENSG00000175482,ENSG00000077514
GO:0035976	AP1 complex	cellular_component	0.025132	0.61475	2	1033	5	19500	ENSG00000170345,ENSG00000130522
GO:0045542	positive regulation of cholesterol biosynthetic process	biological_process	0.025148	0.61475	2	1033	5	19500	ENSG00000127948,ENSG00000072310
GO:0046813	receptor-mediated virion attachment to host cell	biological_process	0.025169	0.61475	2	1033	5	19500	ENSG00000110651,ENSG00000090339
GO:0002764	immune response-regulating signaling pathway	biological_process	0.025171	0.61475	41	1033	564	19500	ENSG00000096384,ENSG00000141968,ENSG00000105298,ENSG00000137275,ENSG00000172936,ENSG00000108622,ENSG00000104783,ENSG00000114738,ENSG00000102882,ENSG00000056586,ENSG00000167851,ENSG00000173039,ENSG00000062598,ENSG00000087088,ENSG00000131196,ENSG00000175866,ENSG00000160691,ENSG00000141480,ENSG00000174775,ENSG00000129657,ENSG00000125826,ENSG00000185499,ENSG00000051523,ENSG00000128322,ENSG00000197879…
GO:0010793	regulation of mRNA export from nucleus	biological_process	0.025172	0.61475	2	1033	5	19500	ENSG00000014164,ENSG00000011243
GO:0005642	annulate lamellae	cellular_component	0.025176	0.61475	2	1033	5	19500	ENSG00000082898,ENSG00000132507
GO:0045084	positive regulation of interleukin-12 biosynthetic process	biological_process	0.025183	0.61475	2	1033	5	19500	ENSG00000173039,ENSG00000125347
GO:0051029	rRNA transport	biological_process	0.025183	0.61475	2	1033	5	19500	ENSG00000128311,ENSG00000165699
GO:0015181	arginine transmembrane transporter activity	molecular_function	0.025184	0.61475	2	1033	5	19500	ENSG00000040487,ENSG00000197119
GO:1903826	arginine transmembrane transport	biological_process	0.025184	0.61475	2	1033	5	19500	ENSG00000040487,ENSG00000197119
GO:0021815	modulation of microtubule cytoskeleton involved in cerebral cortex radial glia guided migration	biological_process	0.02519	0.61475	2	1033	5	19500	ENSG00000100242,ENSG00000054654
GO:0030124	AP-4 adaptor complex	cellular_component	0.025192	0.61475	2	1033	5	19500	ENSG00000167302,ENSG00000100478
GO:0097368	establishment of Sertoli cell barrier	biological_process	0.025194	0.61475	2	1033	5	19500	ENSG00000196924,ENSG00000090339
GO:0007094	mitotic spindle assembly checkpoint	biological_process	0.025195	0.61475	5	1033	32	19500	ENSG00000116670,ENSG00000071539,ENSG00000154473,ENSG00000110200,ENSG00000166851
GO:0051436	negative regulation of ubiquitin-protein ligase activity involved in mitotic cell cycle	biological_process	0.025195	0.61475	5	1033	32	19500	ENSG00000166851,ENSG00000110200,ENSG00000154473,ENSG00000071539,ENSG00000116670
GO:0051439	regulation of ubiquitin-protein ligase activity involved in mitotic cell cycle	biological_process	0.025195	0.61475	5	1033	32	19500	ENSG00000071539,ENSG00000116670,ENSG00000166851,ENSG00000110200,ENSG00000154473
GO:0071173	spindle assembly checkpoint	biological_process	0.025195	0.61475	5	1033	32	19500	ENSG00000166851,ENSG00000110200,ENSG00000154473,ENSG00000071539,ENSG00000116670
GO:0071174	mitotic spindle checkpoint	biological_process	0.025195	0.61475	5	1033	32	19500	ENSG00000116670,ENSG00000071539,ENSG00000154473,ENSG00000166851,ENSG00000110200
GO:0006824	cobalt ion transport	biological_process	0.025196	0.61475	2	1033	5	19500	ENSG00000185339,ENSG00000145740
GO:0010385	double-stranded methylated DNA binding	molecular_function	0.025196	0.61475	2	1033	5	19500	ENSG00000141644,ENSG00000113648
GO:0042406	extrinsic component of endoplasmic reticulum membrane	cellular_component	0.025196	0.61475	2	1033	5	19500	ENSG00000140464,ENSG00000136710
GO:0046976	histone methyltransferase activity (H3-K27 specific)	molecular_function	0.025196	0.61475	2	1033	5	19500	ENSG00000204371,ENSG00000106462
GO:1990462	omegasome	cellular_component	0.025196	0.61475	2	1033	5	19500	ENSG00000165861,ENSG00000177169
GO:0000836	Hrd1p ubiquitin ligase complex	cellular_component	0.025196	0.61475	2	1033	5	19500	ENSG00000162298,ENSG00000135506
GO:0045409	negative regulation of interleukin-6 biosynthetic process	biological_process	0.025196	0.61475	2	1033	5	19500	ENSG00000142405,ENSG00000168918
GO:0061676	importin-alpha family protein binding	molecular_function	0.025196	0.61475	2	1033	5	19500	ENSG00000088325,ENSG00000167110
GO:0016242	negative regulation of macroautophagy	biological_process	0.025251	0.61475	5	1033	32	19500	ENSG00000171100,ENSG00000160803,ENSG00000204371,ENSG00000165699,ENSG00000100300
GO:0043539	protein serine/threonine kinase activator activity	molecular_function	0.025257	0.61475	5	1033	32	19500	ENSG00000266173,ENSG00000160014,ENSG00000167965,ENSG00000100721,ENSG00000101109
GO:0048016	inositol phosphate-mediated signaling	biological_process	0.025299	0.61475	7	1033	55	19500	ENSG00000121753,ENSG00000127129,ENSG00000065361,ENSG00000085872,ENSG00000102908,ENSG00000131196,ENSG00000187446
GO:0015605	organophosphate ester transmembrane transporter activity	molecular_function	0.025303	0.61475	5	1033	32	19500	ENSG00000181830,ENSG00000125648,ENSG00000102100,ENSG00000157593,ENSG00000176087
GO:1900078	positive regulation of cellular response to insulin stimulus	biological_process	0.025312	0.61475	5	1033	32	19500	ENSG00000114353,ENSG00000197879,ENSG00000160685,ENSG00000163884,ENSG00000105647
GO:0045428	regulation of nitric oxide biosynthetic process	biological_process	0.025336	0.61475	7	1033	55	19500	ENSG00000090339,ENSG00000120899,ENSG00000079805,ENSG00000100300,ENSG00000127528,ENSG00000135124,ENSG00000096384
GO:0060090	binding, bridging	molecular_function	0.025407	0.61576	17	1033	191	19500	ENSG00000160691,ENSG00000175866,ENSG00000213658,ENSG00000138606,ENSG00000071051,ENSG00000027869,ENSG00000107338,ENSG00000184060,ENSG00000042753,ENSG00000162517,ENSG00000087266,ENSG00000185340,ENSG00000089820,ENSG00000161203,ENSG00000172534,ENSG00000166963,ENSG00000004478
GO:0002366	leukocyte activation involved in immune response	biological_process	0.025447	0.61603	49	1033	695	19500	ENSG00000213658,ENSG00000120899,ENSG00000096996,ENSG00000067225,ENSG00000143546,ENSG00000105639,ENSG00000169692,ENSG00000011422,ENSG00000086730,ENSG00000160685,ENSG00000090339,ENSG00000170909,ENSG00000244038,ENSG00000102879,ENSG00000100321,ENSG00000051523,ENSG00000136279,ENSG00000116670,ENSG00000185627,ENSG00000116815,ENSG00000143621,ENSG00000171298,ENSG00000196230,ENSG00000175505,ENSG00000204435…
GO:0045860	positive regulation of protein kinase activity	biological_process	0.025509	0.61684	38	1033	516	19500	ENSG00000185527,ENSG00000101109,ENSG00000145214,ENSG00000088325,ENSG00000071054,ENSG00000160014,ENSG00000160691,ENSG00000100721,ENSG00000174775,ENSG00000096384,ENSG00000172939,ENSG00000137275,ENSG00000173327,ENSG00000172232,ENSG00000104814,ENSG00000110931,ENSG00000114738,ENSG00000102882,ENSG00000167851,ENSG00000129465,ENSG00000167965,ENSG00000110651,ENSG00000170315,ENSG00000120899,ENSG00000213658…
GO:0000377	RNA splicing, via transesterification reactions with bulged adenosine as nucleophile	biological_process	0.025803	0.62253	26	1033	327	19500	ENSG00000104852,ENSG00000067596,ENSG00000108883,ENSG00000005436,ENSG00000085872,ENSG00000125970,ENSG00000116350,ENSG00000105323,ENSG00000157110,ENSG00000162385,ENSG00000144028,ENSG00000100142,ENSG00000105298,ENSG00000077312,ENSG00000106245,ENSG00000169976,ENSG00000169371,ENSG00000063244,ENSG00000168883,ENSG00000173933,ENSG00000142252,ENSG00000005075,ENSG00000204392,ENSG00000182872,ENSG00000087087…
GO:0000398	mRNA splicing, via spliceosome	biological_process	0.025803	0.62253	26	1033	327	19500	ENSG00000157110,ENSG00000162385,ENSG00000144028,ENSG00000100142,ENSG00000067596,ENSG00000104852,ENSG00000108883,ENSG00000005436,ENSG00000085872,ENSG00000125970,ENSG00000116350,ENSG00000105323,ENSG00000142252,ENSG00000005075,ENSG00000204392,ENSG00000087087,ENSG00000182872,ENSG00000198563,ENSG00000105298,ENSG00000077312,ENSG00000106245,ENSG00000169976,ENSG00000169371,ENSG00000063244,ENSG00000173933…
GO:0032944	regulation of mononuclear cell proliferation	biological_process	0.025877	0.62359	18	1033	206	19500	ENSG00000168918,ENSG00000096996,ENSG00000105639,ENSG00000071051,ENSG00000110651,ENSG00000160685,ENSG00000186827,ENSG00000125347,ENSG00000013725,ENSG00000102879,ENSG00000172936,ENSG00000151208,ENSG00000168071,ENSG00000175505,ENSG00000167851,ENSG00000129465,ENSG00000130427,ENSG00000240505
GO:0042098	T cell proliferation	biological_process	0.026053	0.62617	16	1033	177	19500	ENSG00000013725,ENSG00000102879,ENSG00000160685,ENSG00000026950,ENSG00000125347,ENSG00000186827,ENSG00000071051,ENSG00000105639,ENSG00000096996,ENSG00000102034,ENSG00000056586,ENSG00000168071,ENSG00000151208,ENSG00000087088,ENSG00000130427,ENSG00000129465
GO:0044403	symbiosis, encompassing mutualism through parasitism	biological_process	0.026072	0.62617	51	1033	729	19500	ENSG00000068001,ENSG00000172232,ENSG00000158773,ENSG00000096384,ENSG00000172936,ENSG00000082898,ENSG00000137275,ENSG00000137309,ENSG00000173039,ENSG00000073060,ENSG00000087088,ENSG00000198563,ENSG00000102882,ENSG00000172757,ENSG00000157873,ENSG00000160014,ENSG00000177169,ENSG00000160691,ENSG00000080603,ENSG00000167977,ENSG00000108518,ENSG00000100298,ENSG00000105701,ENSG00000173020,ENSG00000013573…
GO:0044419	interspecies interaction between organisms	biological_process	0.026072	0.62617	51	1033	729	19500	ENSG00000096384,ENSG00000158773,ENSG00000137309,ENSG00000137275,ENSG00000172936,ENSG00000082898,ENSG00000172232,ENSG00000068001,ENSG00000102882,ENSG00000172757,ENSG00000157873,ENSG00000073060,ENSG00000173039,ENSG00000198563,ENSG00000087088,ENSG00000160014,ENSG00000160691,ENSG00000177169,ENSG00000108518,ENSG00000167977,ENSG00000100298,ENSG00000080603,ENSG00000109854,ENSG00000125826,ENSG00000086102…
GO:0070588	calcium ion transmembrane transport	biological_process	0.026187	0.62789	20	1033	236	19500	ENSG00000107745,ENSG00000156026,ENSG00000166592,ENSG00000183172,ENSG00000074370,ENSG00000139890,ENSG00000184381,ENSG00000160014,ENSG00000017260,ENSG00000184014,ENSG00000160991,ENSG00000165125,ENSG00000154118,ENSG00000100991,ENSG00000108953,ENSG00000125648,ENSG00000186642,ENSG00000185482,ENSG00000141837,ENSG00000135124
GO:1903509	liposaccharide metabolic process	biological_process	0.026239	0.62789	11	1033	107	19500	ENSG00000110080,ENSG00000196743,ENSG00000087088,ENSG00000108474,ENSG00000160408,ENSG00000064601,ENSG00000136699,ENSG00000119227,ENSG00000165282,ENSG00000007541,ENSG00000115525
GO:0044700	single organism signaling	biological_process	0.026319	0.62789	373	1033	6490	19500	ENSG00000165802,ENSG00000105507,ENSG00000127533,ENSG00000129465,ENSG00000053524,ENSG00000166851,ENSG00000171100,ENSG00000197114,ENSG00000106245,ENSG00000108518,ENSG00000068971,ENSG00000156026,ENSG00000165699,ENSG00000149927,ENSG00000164362,ENSG00000140332,ENSG00000164308,ENSG00000014216,ENSG00000085733,ENSG00000130175,ENSG00000160789,ENSG00000088325,ENSG00000170633,ENSG00000149798,ENSG00000169242…
GO:0030054	cell junction	cellular_component	0.026472	0.62789	82	1033	1252	19500	ENSG00000181790,ENSG00000214063,ENSG00000069424,ENSG00000175866,ENSG00000185236,ENSG00000187486,ENSG00000128309,ENSG00000143375,ENSG00000079819,ENSG00000141968,ENSG00000071127,ENSG00000113758,ENSG00000120903,ENSG00000088899,ENSG00000102225,ENSG00000113742,ENSG00000172354,ENSG00000164687,ENSG00000179526,ENSG00000167460,ENSG00000011422,ENSG00000108262,ENSG00000110651,ENSG00000015285,ENSG00000196924…
GO:0006783	heme biosynthetic process	biological_process	0.02656	0.62789	4	1033	22	19500	ENSG00000006695,ENSG00000135100,ENSG00000111843,ENSG00000100300
GO:0044255	cellular lipid metabolic process	biological_process	0.026599	0.62789	71	1033	1065	19500	ENSG00000102125,ENSG00000065361,ENSG00000161217,ENSG00000181830,ENSG00000168890,ENSG00000169692,ENSG00000136699,ENSG00000110651,ENSG00000119227,ENSG00000184381,ENSG00000168918,ENSG00000127129,ENSG00000007541,ENSG00000134824,ENSG00000103056,ENSG00000105647,ENSG00000072310,ENSG00000221968,ENSG00000141968,ENSG00000084207,ENSG00000115525,ENSG00000159445,ENSG00000196743,ENSG00000100100,ENSG00000143554…
GO:0046386	deoxyribose phosphate catabolic process	biological_process	0.0266	0.62789	4	1033	22	19500	ENSG00000205309,ENSG00000129071,ENSG00000125458,ENSG00000275074
GO:0006606	protein import into nucleus	biological_process	0.026617	0.62789	17	1033	192	19500	ENSG00000105647,ENSG00000157110,ENSG00000133612,ENSG00000160789,ENSG00000146232,ENSG00000215021,ENSG00000102898,ENSG00000187446,ENSG00000140464,ENSG00000079999,ENSG00000176973,ENSG00000068001,ENSG00000138757,ENSG00000064419,ENSG00000169371,ENSG00000096384,ENSG00000186642
GO:0044744	protein targeting to nucleus	biological_process	0.026617	0.62789	17	1033	192	19500	ENSG00000157110,ENSG00000105647,ENSG00000187446,ENSG00000102898,ENSG00000146232,ENSG00000160789,ENSG00000133612,ENSG00000215021,ENSG00000176973,ENSG00000140464,ENSG00000079999,ENSG00000186642,ENSG00000096384,ENSG00000064419,ENSG00000169371,ENSG00000068001,ENSG00000138757
GO:1902593	single-organism nuclear import	biological_process	0.026617	0.62789	17	1033	192	19500	ENSG00000105647,ENSG00000157110,ENSG00000160789,ENSG00000146232,ENSG00000133612,ENSG00000215021,ENSG00000102898,ENSG00000187446,ENSG00000140464,ENSG00000079999,ENSG00000176973,ENSG00000068001,ENSG00000138757,ENSG00000064419,ENSG00000169371,ENSG00000096384,ENSG00000186642
GO:0034067	protein localization to Golgi apparatus	biological_process	0.026648	0.62789	4	1033	22	19500	ENSG00000107862,ENSG00000039523,ENSG00000109083,ENSG00000141551
GO:0007035	vacuolar acidification	biological_process	0.026684	0.62789	4	1033	22	19500	ENSG00000136710,ENSG00000117410,ENSG00000171130,ENSG00000102805
GO:0023058	adaptation of signaling pathway	biological_process	0.026688	0.62789	4	1033	22	19500	ENSG00000141480,ENSG00000106976,ENSG00000173020,ENSG00000079805
GO:0090312	positive regulation of protein deacetylation	biological_process	0.026696	0.62789	4	1033	22	19500	ENSG00000072310,ENSG00000168522,ENSG00000160685,ENSG00000011243
GO:0001891	phagocytic cup	cellular_component	0.026701	0.62789	4	1033	22	19500	ENSG00000079805,ENSG00000181790,ENSG00000102879,ENSG00000100092
GO:2000050	regulation of non-canonical Wnt signaling pathway	biological_process	0.026703	0.62789	4	1033	22	19500	ENSG00000141551,ENSG00000173821,ENSG00000135299,ENSG00000213923
GO:0008373	sialyltransferase activity	molecular_function	0.026705	0.62789	4	1033	22	19500	ENSG00000115525,ENSG00000160408,ENSG00000126091,ENSG00000110080
GO:0097503	sialylation	biological_process	0.026705	0.62789	4	1033	22	19500	ENSG00000160408,ENSG00000115525,ENSG00000110080,ENSG00000126091
GO:0030149	sphingolipid catabolic process	biological_process	0.026705	0.62789	4	1033	22	19500	ENSG00000176170,ENSG00000196743,ENSG00000103056,ENSG00000136699
GO:0010822	positive regulation of mitochondrion organization	biological_process	0.026756	0.62837	12	1033	121	19500	ENSG00000163930,ENSG00000182768,ENSG00000110931,ENSG00000155906,ENSG00000070770,ENSG00000184381,ENSG00000136305,ENSG00000011422,ENSG00000087088,ENSG00000156990,ENSG00000108953,ENSG00000105327
GO:0030968	endoplasmic reticulum unfolded protein response	biological_process	0.026798	0.62854	12	1033	121	19500	ENSG00000160691,ENSG00000160789,ENSG00000162298,ENSG00000013573,ENSG00000071051,ENSG00000143578,ENSG00000087088,ENSG00000131871,ENSG00000087274,ENSG00000149428,ENSG00000068971,ENSG00000105327
GO:0008186	RNA-dependent ATPase activity	molecular_function	0.026822	0.62854	8	1033	68	19500	ENSG00000005007,ENSG00000144028,ENSG00000198563,ENSG00000123064,ENSG00000157349,ENSG00000067596,ENSG00000013573,ENSG00000204351
GO:0055080	cation homeostasis	biological_process	0.027126	0.63455	47	1033	665	19500	ENSG00000183172,ENSG00000105327,ENSG00000102879,ENSG00000083454,ENSG00000165915,ENSG00000154118,ENSG00000165125,ENSG00000187446,ENSG00000178719,ENSG00000120899,ENSG00000197043,ENSG00000114353,ENSG00000085872,ENSG00000127129,ENSG00000143546,ENSG00000184381,ENSG00000187045,ENSG00000108953,ENSG00000050426,ENSG00000130427,ENSG00000140464,ENSG00000135124,ENSG00000136710,ENSG00000139832,ENSG00000051523…
GO:0018130	heterocycle biosynthetic process	biological_process	0.027138	0.63455	256	1033	4346	19500	ENSG00000120899,ENSG00000120057,ENSG00000112561,ENSG00000116580,ENSG00000188779,ENSG00000241837,ENSG00000089335,ENSG00000106992,ENSG00000007237,ENSG00000163382,ENSG00000020256,ENSG00000116670,ENSG00000133250,ENSG00000143621,ENSG00000171467,ENSG00000149600,ENSG00000175221,ENSG00000169242,ENSG00000196418,ENSG00000087087,ENSG00000124444,ENSG00000113648,ENSG00000028277,ENSG00000148143,ENSG00000164362…
GO:0019318	hexose metabolic process	biological_process	0.027209	0.63551	20	1033	237	19500	ENSG00000180549,ENSG00000149925,ENSG00000145214,ENSG00000117308,ENSG00000067225,ENSG00000076555,ENSG00000117448,ENSG00000187486,ENSG00000146674,ENSG00000108515,ENSG00000160211,ENSG00000149639,ENSG00000131871,ENSG00000102100,ENSG00000158773,ENSG00000160741,ENSG00000124713,ENSG00000164687,ENSG00000171298,ENSG00000111669
GO:0046777	protein autophosphorylation	biological_process	0.027274	0.63632	20	1033	237	19500	ENSG00000101109,ENSG00000187446,ENSG00000177169,ENSG00000120899,ENSG00000087586,ENSG00000142405,ENSG00000160014,ENSG00000105639,ENSG00000075413,ENSG00000068971,ENSG00000137275,ENSG00000198909,ENSG00000104814,ENSG00000110931,ENSG00000173327,ENSG00000179335,ENSG00000102882,ENSG00000114738,ENSG00000140474,ENSG00000129465
GO:0015459	potassium channel regulator activity	molecular_function	0.027503	0.64076	6	1033	44	19500	ENSG00000108953,ENSG00000187446,ENSG00000171121,ENSG00000069424,ENSG00000120049,ENSG00000196924
GO:0033993	response to lipid	biological_process	0.027525	0.64076	58	1033	848	19500	ENSG00000167548,ENSG00000160781,ENSG00000011485,ENSG00000100300,ENSG00000090339,ENSG00000131871,ENSG00000072310,ENSG00000186827,ENSG00000107331,ENSG00000062524,ENSG00000163344,ENSG00000054356,ENSG00000005007,ENSG00000013725,ENSG00000112799,ENSG00000120899,ENSG00000215021,ENSG00000143546,ENSG00000157227,ENSG00000182749,ENSG00000104852,ENSG00000129071,ENSG00000137496,ENSG00000170345,ENSG00000204516…
GO:0034394	protein localization to cell surface	biological_process	0.027696	0.64242	7	1033	56	19500	ENSG00000069424,ENSG00000107862,ENSG00000196924,ENSG00000185236,ENSG00000166900,ENSG00000096384,ENSG00000166963
GO:0006006	glucose metabolic process	biological_process	0.027745	0.64242	17	1033	193	19500	ENSG00000067225,ENSG00000145214,ENSG00000149925,ENSG00000149639,ENSG00000131871,ENSG00000160211,ENSG00000108515,ENSG00000076555,ENSG00000117448,ENSG00000187486,ENSG00000146674,ENSG00000160741,ENSG00000158773,ENSG00000164687,ENSG00000171298,ENSG00000111669,ENSG00000124713
GO:0051208	sequestering of calcium ion	biological_process	0.027851	0.64242	11	1033	108	19500	ENSG00000102879,ENSG00000105327,ENSG00000127533,ENSG00000087088,ENSG00000154118,ENSG00000131504,ENSG00000051523,ENSG00000160014,ENSG00000125648,ENSG00000120899,ENSG00000085872
GO:1902115	regulation of organelle assembly	biological_process	0.027858	0.64242	15	1033	164	19500	ENSG00000166851,ENSG00000109083,ENSG00000171100,ENSG00000148356,ENSG00000185324,ENSG00000079805,ENSG00000177169,ENSG00000139437,ENSG00000032742,ENSG00000187535,ENSG00000103148,ENSG00000204371,ENSG00000184640,ENSG00000168488,ENSG00000054654
GO:0043068	positive regulation of programmed cell death	biological_process	0.027879	0.64242	44	1033	617	19500	ENSG00000141480,ENSG00000160570,ENSG00000132694,ENSG00000136305,ENSG00000101109,ENSG00000071051,ENSG00000182872,ENSG00000129465,ENSG00000087088,ENSG00000141968,ENSG00000182871,ENSG00000159202,ENSG00000137275,ENSG00000173327,ENSG00000274897,ENSG00000140961,ENSG00000068001,ENSG00000185825,ENSG00000105327,ENSG00000146674,ENSG00000062524,ENSG00000158941,ENSG00000100300,ENSG00000011422,ENSG00000135916…
GO:0033365	protein localization to organelle	biological_process	0.027907	0.64242	57	1033	832	19500	ENSG00000135506,ENSG00000164362,ENSG00000109083,ENSG00000160789,ENSG00000160014,ENSG00000113648,ENSG00000131504,ENSG00000100242,ENSG00000095321,ENSG00000102901,ENSG00000137497,ENSG00000087088,ENSG00000166851,ENSG00000096384,ENSG00000082898,ENSG00000100139,ENSG00000068001,ENSG00000138757,ENSG00000185825,ENSG00000169371,ENSG00000105327,ENSG00000157110,ENSG00000105647,ENSG00000100300,ENSG00000072310…
GO:0009260	ribonucleotide biosynthetic process	biological_process	0.028074	0.64242	18	1033	208	19500	ENSG00000106992,ENSG00000076555,ENSG00000130717,ENSG00000143774,ENSG00000241837,ENSG00000149925,ENSG00000157593,ENSG00000004455,ENSG00000132518,ENSG00000114353,ENSG00000160014,ENSG00000106348,ENSG00000047230,ENSG00000067225,ENSG00000138031,ENSG00000102125,ENSG00000138621,ENSG00000172992
GO:0071897	DNA biosynthetic process	biological_process	0.028218	0.64242	14	1033	150	19500	ENSG00000096384,ENSG00000170315,ENSG00000116670,ENSG00000175482,ENSG00000049541,ENSG00000120899,ENSG00000102882,ENSG00000077514,ENSG00000141480,ENSG00000156587,ENSG00000166169,ENSG00000166548,ENSG00000164362,ENSG00000198563
GO:0032802	low-density lipoprotein particle receptor catabolic process	biological_process	0.02822	0.64242	3	1033	13	19500	ENSG00000161203,ENSG00000140564,ENSG00000042753
GO:0042593	glucose homeostasis	biological_process	0.028249	0.64242	19	1033	223	19500	ENSG00000185236,ENSG00000184381,ENSG00000071054,ENSG00000054356,ENSG00000187486,ENSG00000124160,ENSG00000135100,ENSG00000090339,ENSG00000156026,ENSG00000105647,ENSG00000148737,ENSG00000141837,ENSG00000158773,ENSG00000160741,ENSG00000051523,ENSG00000102225,ENSG00000112759,ENSG00000164687,ENSG00000077463
GO:1901362	organic cyclic compound biosynthetic process	biological_process	0.028286	0.64242	264	1033	4496	19500	ENSG00000102034,ENSG00000137843,ENSG00000109118,ENSG00000054356,ENSG00000105647,ENSG00000204227,ENSG00000186642,ENSG00000034152,ENSG00000186446,ENSG00000134013,ENSG00000013573,ENSG00000078699,ENSG00000160741,ENSG00000188486,ENSG00000171466,ENSG00000165702,ENSG00000124664,ENSG00000111642,ENSG00000108840,ENSG00000149925,ENSG00000066136,ENSG00000102908,ENSG00000160014,ENSG00000049541,ENSG00000196235…
GO:0017160	Ral GTPase binding	molecular_function	0.028291	0.64242	3	1033	13	19500	ENSG00000197879,ENSG00000196924,ENSG00000204392
GO:0006244	pyrimidine nucleotide catabolic process	biological_process	0.028306	0.64242	3	1033	13	19500	ENSG00000129071,ENSG00000125458,ENSG00000205309
GO:0051253	negative regulation of RNA metabolic process	biological_process	0.028307	0.64242	88	1033	1359	19500	ENSG00000123064,ENSG00000204371,ENSG00000173039,ENSG00000077463,ENSG00000182872,ENSG00000063244,ENSG00000129757,ENSG00000127528,ENSG00000197114,ENSG00000137309,ENSG00000141644,ENSG00000166851,ENSG00000164362,ENSG00000163346,ENSG00000141480,ENSG00000160691,ENSG00000113648,ENSG00000071051,ENSG00000171467,ENSG00000149600,ENSG00000130427,ENSG00000179583,ENSG00000068903,ENSG00000079999,ENSG00000169242…
GO:0036230	granulocyte activation	biological_process	0.028318	0.64242	37	1033	504	19500	ENSG00000204435,ENSG00000171298,ENSG00000196230,ENSG00000185627,ENSG00000116815,ENSG00000143621,ENSG00000100321,ENSG00000051523,ENSG00000136279,ENSG00000244038,ENSG00000170909,ENSG00000169692,ENSG00000011422,ENSG00000067225,ENSG00000143546,ENSG00000005844,ENSG00000196743,ENSG00000133246,ENSG00000164687,ENSG00000167851,ENSG00000096384,ENSG00000084207,ENSG00000172232,ENSG00000180448,ENSG00000101425…
GO:1900029	positive regulation of ruffle assembly	biological_process	0.028335	0.64242	3	1033	13	19500	ENSG00000177106,ENSG00000174775,ENSG00000108518
GO:0051775	response to redox state	biological_process	0.028335	0.64242	3	1033	13	19500	ENSG00000068903,ENSG00000141522,ENSG00000131871
GO:0019692	deoxyribose phosphate metabolic process	biological_process	0.028416	0.64242	5	1033	33	19500	ENSG00000129071,ENSG00000125458,ENSG00000275074,ENSG00000205309,ENSG00000143774
GO:0005513	detection of calcium ion	biological_process	0.028425	0.64242	3	1033	13	19500	ENSG00000120049,ENSG00000171121,ENSG00000160014
GO:0031274	positive regulation of pseudopodium assembly	biological_process	0.028429	0.64242	3	1033	13	19500	ENSG00000128283,ENSG00000149798,ENSG00000188277
GO:0033127	regulation of histone phosphorylation	biological_process	0.028437	0.64242	3	1033	13	19500	ENSG00000102882,ENSG00000011243,ENSG00000113648
GO:0009982	pseudouridine synthase activity	molecular_function	0.028443	0.64242	3	1033	13	19500	ENSG00000156990,ENSG00000177192,ENSG00000007376
GO:0032239	regulation of nucleobase-containing compound transport	biological_process	0.028444	0.64242	3	1033	13	19500	ENSG00000011243,ENSG00000137275,ENSG00000014164
GO:0045841	negative regulation of mitotic metaphase/anaphase transition	biological_process	0.028445	0.64242	5	1033	33	19500	ENSG00000116670,ENSG00000071539,ENSG00000154473,ENSG00000166851,ENSG00000110200
GO:1904668	positive regulation of ubiquitin protein ligase activity	biological_process	0.028446	0.64242	3	1033	13	19500	ENSG00000166851,ENSG00000167110,ENSG00000114745
GO:0071352	cellular response to interleukin-2	biological_process	0.028459	0.64242	3	1033	13	19500	ENSG00000160691,ENSG00000120899,ENSG00000105639
GO:0016580	Sin3 complex	cellular_component	0.028459	0.64242	3	1033	13	19500	ENSG00000127511,ENSG00000109118,ENSG00000101266
GO:0005338	nucleotide-sugar transmembrane transporter activity	molecular_function	0.028459	0.64242	3	1033	13	19500	ENSG00000181830,ENSG00000176087,ENSG00000102100
GO:0000375	RNA splicing, via transesterification reactions	biological_process	0.028474	0.64242	26	1033	330	19500	ENSG00000198563,ENSG00000142252,ENSG00000005075,ENSG00000182872,ENSG00000204392,ENSG00000087087,ENSG00000169976,ENSG00000106245,ENSG00000063244,ENSG00000169371,ENSG00000168883,ENSG00000173933,ENSG00000105298,ENSG00000077312,ENSG00000144028,ENSG00000100142,ENSG00000157110,ENSG00000162385,ENSG00000085872,ENSG00000125970,ENSG00000116350,ENSG00000105323,ENSG00000104852,ENSG00000067596,ENSG00000108883…
GO:0006356	regulation of transcription from RNA polymerase I promoter	biological_process	0.028528	0.64296	5	1033	33	19500	ENSG00000166986,ENSG00000196924,ENSG00000013573,ENSG00000113648,ENSG00000158796
GO:0071353	cellular response to interleukin-4	biological_process	0.028565	0.64313	5	1033	33	19500	ENSG00000105639,ENSG00000079999,ENSG00000140464,ENSG00000102879,ENSG00000096384
GO:0090317	negative regulation of intracellular protein transport	biological_process	0.028966	0.6511	8	1033	69	19500	ENSG00000187446,ENSG00000186642,ENSG00000100401,ENSG00000138757,ENSG00000146232,ENSG00000176973,ENSG00000135506,ENSG00000079999
GO:1902494	catalytic complex	cellular_component	0.028981	0.6511	76	1033	1155	19500	ENSG00000108840,ENSG00000124787,ENSG00000127511,ENSG00000102893,ENSG00000007174,ENSG00000160014,ENSG00000172057,ENSG00000167792,ENSG00000108515,ENSG00000100897,ENSG00000196498,ENSG00000135365,ENSG00000064313,ENSG00000147533,ENSG00000213619,ENSG00000165821,ENSG00000158773,ENSG00000125952,ENSG00000175482,ENSG00000162298,ENSG00000078369,ENSG00000105341,ENSG00000149923,ENSG00000186184,ENSG00000179526…
GO:0000045	autophagosome assembly	biological_process	0.029181	0.6549	9	1033	82	19500	ENSG00000032742,ENSG00000177169,ENSG00000171100,ENSG00000109083,ENSG00000168397,ENSG00000148356,ENSG00000204371,ENSG00000179364,ENSG00000103148
GO:2000113	negative regulation of cellular macromolecule biosynthetic process	biological_process	0.029279	0.6564	95	1033	1482	19500	ENSG00000186827,ENSG00000197299,ENSG00000111676,ENSG00000072310,ENSG00000204227,ENSG00000134283,ENSG00000109118,ENSG00000005007,ENSG00000257949,ENSG00000187045,ENSG00000142405,ENSG00000215021,ENSG00000196924,ENSG00000005436,ENSG00000135916,ENSG00000170315,ENSG00000140464,ENSG00000128917,ENSG00000124664,ENSG00000111642,ENSG00000061273,ENSG00000188486,ENSG00000172534,ENSG00000165702,ENSG00000071564…
GO:0033500	carbohydrate homeostasis	biological_process	0.029398	0.65839	19	1033	224	19500	ENSG00000135100,ENSG00000124160,ENSG00000187486,ENSG00000054356,ENSG00000105647,ENSG00000156026,ENSG00000090339,ENSG00000071054,ENSG00000184381,ENSG00000185236,ENSG00000102225,ENSG00000077463,ENSG00000164687,ENSG00000112759,ENSG00000158773,ENSG00000141837,ENSG00000148737,ENSG00000051523,ENSG00000160741
GO:0098662	inorganic cation transmembrane transport	biological_process	0.02972	0.6649	47	1033	669	19500	ENSG00000160014,ENSG00000069424,ENSG00000017260,ENSG00000184014,ENSG00000145740,ENSG00000006695,ENSG00000171121,ENSG00000156026,ENSG00000107745,ENSG00000166592,ENSG00000173826,ENSG00000122986,ENSG00000187486,ENSG00000076555,ENSG00000167614,ENSG00000143570,ENSG00000168003,ENSG00000125648,ENSG00000126267,ENSG00000185482,ENSG00000143882,ENSG00000141837,ENSG00000172939,ENSG00000177542,ENSG00000171130…
GO:0051640	organelle localization	biological_process	0.029854	0.66618	37	1033	506	19500	ENSG00000162236,ENSG00000185236,ENSG00000174871,ENSG00000132361,ENSG00000160014,ENSG00000143740,ENSG00000109083,ENSG00000116786,ENSG00000149927,ENSG00000114745,ENSG00000082898,ENSG00000167110,ENSG00000054116,ENSG00000171100,ENSG00000137497,ENSG00000161203,ENSG00000167851,ENSG00000135441,ENSG00000100242,ENSG00000213658,ENSG00000129219,ENSG00000087586,ENSG00000170315,ENSG00000142945,ENSG00000086730…
GO:1903533	regulation of protein targeting	biological_process	0.029862	0.66618	16	1033	180	19500	ENSG00000187446,ENSG00000102898,ENSG00000146232,ENSG00000070770,ENSG00000157110,ENSG00000174775,ENSG00000072310,ENSG00000105647,ENSG00000096384,ENSG00000186642,ENSG00000197879,ENSG00000163930,ENSG00000068001,ENSG00000138757,ENSG00000176973,ENSG00000079999
GO:0002768	immune response-regulating cell surface receptor signaling pathway	biological_process	0.029871	0.66618	31	1033	410	19500	ENSG00000105647,ENSG00000130775,ENSG00000170909,ENSG00000026950,ENSG00000086730,ENSG00000174775,ENSG00000184381,ENSG00000131196,ENSG00000160691,ENSG00000175866,ENSG00000213658,ENSG00000129219,ENSG00000168918,ENSG00000170345,ENSG00000111361,ENSG00000015285,ENSG00000062598,ENSG00000173039,ENSG00000167851,ENSG00000204516,ENSG00000087088,ENSG00000104783,ENSG00000056586,ENSG00000102882,ENSG00000185499…
GO:0010604	positive regulation of macromolecule metabolic process	biological_process	0.029949	0.66721	190	1033	3163	19500	ENSG00000160691,ENSG00000071051,ENSG00000213923,ENSG00000132694,ENSG00000133216,ENSG00000100721,ENSG00000110801,ENSG00000100151,ENSG00000185324,ENSG00000173327,ENSG00000125447,ENSG00000172936,ENSG00000101266,ENSG00000137275,ENSG00000137309,ENSG00000172939,ENSG00000132329,ENSG00000173039,ENSG00000087088,ENSG00000198563,ENSG00000196588,ENSG00000161203,ENSG00000132510,ENSG00000102882,ENSG00000114738…
GO:0005070	SH3/SH2 adaptor activity	molecular_function	0.030207	0.67173	7	1033	57	19500	ENSG00000027869,ENSG00000089820,ENSG00000213658,ENSG00000138606,ENSG00000087266,ENSG00000071051,ENSG00000107338
GO:0016239	positive regulation of macroautophagy	biological_process	0.030215	0.67173	7	1033	57	19500	ENSG00000160360,ENSG00000110931,ENSG00000196235,ENSG00000177169,ENSG00000165699,ENSG00000148356,ENSG00000102882
GO:0031406	carboxylic acid binding	molecular_function	0.030403	0.67425	18	1033	210	19500	ENSG00000108953,ENSG00000226124,ENSG00000124713,ENSG00000111325,ENSG00000164687,ENSG00000167851,ENSG00000073060,ENSG00000172482,ENSG00000239282,ENSG00000137880,ENSG00000166900,ENSG00000076555,ENSG00000117385,ENSG00000182199,ENSG00000181790,ENSG00000141522,ENSG00000181396,ENSG00000143546
GO:0016032	viral process	biological_process	0.03042	0.67425	47	1033	670	19500	ENSG00000198563,ENSG00000087088,ENSG00000073060,ENSG00000173039,ENSG00000157873,ENSG00000102882,ENSG00000172757,ENSG00000068001,ENSG00000137309,ENSG00000137275,ENSG00000082898,ENSG00000096384,ENSG00000158773,ENSG00000080603,ENSG00000167977,ENSG00000108518,ENSG00000100298,ENSG00000160691,ENSG00000140564,ENSG00000204516,ENSG00000107862,ENSG00000171552,ENSG00000140464,ENSG00000136717,ENSG00000160948…
GO:0002376	immune system process	biological_process	0.030424	0.67425	183	1033	3039	19500	ENSG00000185825,ENSG00000168003,ENSG00000167770,ENSG00000105298,ENSG00000071127,ENSG00000149131,ENSG00000096384,ENSG00000141968,ENSG00000159674,ENSG00000164687,ENSG00000167851,ENSG00000175866,ENSG00000131196,ENSG00000172057,ENSG00000101109,ENSG00000160211,ENSG00000147533,ENSG00000167613,ENSG00000174775,ENSG00000166925,ENSG00000100298,ENSG00000135100,ENSG00000103245,ENSG00000124570,ENSG00000122641…
GO:0007050	cell cycle arrest	biological_process	0.030517	0.67561	20	1033	240	19500	ENSG00000125347,ENSG00000007237,ENSG00000106992,ENSG00000088038,ENSG00000174775,ENSG00000068971,ENSG00000087586,ENSG00000167965,ENSG00000087088,ENSG00000266173,ENSG00000068028,ENSG00000140464,ENSG00000185340,ENSG00000188186,ENSG00000136717,ENSG00000122641,ENSG00000129757,ENSG00000185499,ENSG00000148737,ENSG00000096384
GO:0022604	regulation of cell morphogenesis	biological_process	0.030737	0.67977	41	1033	572	19500	ENSG00000169242,ENSG00000141551,ENSG00000149798,ENSG00000128283,ENSG00000184640,ENSG00000134013,ENSG00000106462,ENSG00000120318,ENSG00000187535,ENSG00000079805,ENSG00000116670,ENSG00000124772,ENSG00000164050,ENSG00000102879,ENSG00000054654,ENSG00000090339,ENSG00000197283,ENSG00000120899,ENSG00000176438,ENSG00000139437,ENSG00000196924,ENSG00000196576,ENSG00000172757,ENSG00000165802,ENSG00000088899…
GO:0016787	hydrolase activity	molecular_function	0.030861	0.68028	161	1033	2647	19500	ENSG00000096384,ENSG00000137880,ENSG00000167770,ENSG00000159445,ENSG00000014164,ENSG00000100605,ENSG00000107719,ENSG00000172354,ENSG00000078369,ENSG00000103066,ENSG00000017260,ENSG00000198825,ENSG00000127511,ENSG00000007174,ENSG00000011376,ENSG00000100298,ENSG00000127948,ENSG00000006007,ENSG00000174775,ENSG00000052344,ENSG00000118655,ENSG00000259431,ENSG00000166592,ENSG00000168397,ENSG00000142330…
GO:0006297	nucleotide-excision repair, DNA gap filling	biological_process	0.030861	0.68028	4	1033	23	19500	ENSG00000049541,ENSG00000175482,ENSG00000170315,ENSG00000077514
GO:0032201	telomere maintenance via semi-conservative replication	biological_process	0.030948	0.68028	4	1033	23	19500	ENSG00000049541,ENSG00000175482,ENSG00000005007,ENSG00000077514
GO:0032496	response to lipopolysaccharide	biological_process	0.030961	0.68028	25	1033	317	19500	ENSG00000102882,ENSG00000130522,ENSG00000114738,ENSG00000157873,ENSG00000173039,ENSG00000073060,ENSG00000130427,ENSG00000159674,ENSG00000084207,ENSG00000172936,ENSG00000105298,ENSG00000054967,ENSG00000120949,ENSG00000005007,ENSG00000013725,ENSG00000186827,ENSG00000100300,ENSG00000131871,ENSG00000090339,ENSG00000108840,ENSG00000137496,ENSG00000170345,ENSG00000110324,ENSG00000143546,ENSG00000112799
GO:0030159	receptor signaling complex scaffold activity	molecular_function	0.030965	0.68028	4	1033	23	19500	ENSG00000071051,ENSG00000160570,ENSG00000151208,ENSG00000138757
GO:0051984	positive regulation of chromosome segregation	biological_process	0.03101	0.68028	4	1033	23	19500	ENSG00000068903,ENSG00000013573,ENSG00000113648,ENSG00000137497
GO:0030901	midbrain development	biological_process	0.031062	0.68028	9	1033	83	19500	ENSG00000160211,ENSG00000068903,ENSG00000151208,ENSG00000127561,ENSG00000108953,ENSG00000108515,ENSG00000160014,ENSG00000126267,ENSG00000213619
GO:0030532	small nuclear ribonucleoprotein complex	cellular_component	0.031077	0.68028	8	1033	70	19500	ENSG00000077312,ENSG00000108883,ENSG00000104852,ENSG00000169976,ENSG00000204392,ENSG00000157110,ENSG00000144028,ENSG00000198563
GO:0030670	phagocytic vesicle membrane	cellular_component	0.031159	0.68028	8	1033	70	19500	ENSG00000102879,ENSG00000167461,ENSG00000117410,ENSG00000171130,ENSG00000185236,ENSG00000139832,ENSG00000079805,ENSG00000051523
GO:0009890	negative regulation of biosynthetic process	biological_process	0.031166	0.68028	105	1033	1660	19500	ENSG00000204371,ENSG00000077463,ENSG00000173039,ENSG00000123064,ENSG00000182872,ENSG00000129757,ENSG00000141644,ENSG00000166851,ENSG00000141837,ENSG00000197114,ENSG00000127528,ENSG00000137309,ENSG00000163346,ENSG00000165699,ENSG00000149639,ENSG00000141480,ENSG00000113648,ENSG00000160691,ENSG00000071051,ENSG00000130427,ENSG00000149600,ENSG00000179583,ENSG00000079999,ENSG00000068903,ENSG00000171467…
GO:0042446	hormone biosynthetic process	biological_process	0.031179	0.68028	8	1033	70	19500	ENSG00000127948,ENSG00000100300,ENSG00000073060,ENSG00000145214,ENSG00000141837,ENSG00000108786,ENSG00000132196,ENSG00000161513
GO:1903426	regulation of reactive oxygen species biosynthetic process	biological_process	0.031196	0.68028	9	1033	83	19500	ENSG00000127528,ENSG00000135124,ENSG00000096384,ENSG00000181790,ENSG00000120899,ENSG00000079805,ENSG00000051523,ENSG00000090339,ENSG00000100300
GO:0048199	vesicle targeting, to, from or within Golgi	biological_process	0.031201	0.68028	8	1033	70	19500	ENSG00000167110,ENSG00000054116,ENSG00000162517,ENSG00000114745,ENSG00000174871,ENSG00000162236,ENSG00000141551,ENSG00000107862
GO:0090398	cellular senescence	biological_process	0.031209	0.68028	8	1033	70	19500	ENSG00000164362,ENSG00000140464,ENSG00000174775,ENSG00000188486,ENSG00000090238,ENSG00000140474,ENSG00000198909,ENSG00000137309
GO:0000041	transition metal ion transport	biological_process	0.031381	0.68291	11	1033	110	19500	ENSG00000167614,ENSG00000004478,ENSG00000117410,ENSG00000185339,ENSG00000165915,ENSG00000171130,ENSG00000145740,ENSG00000143882,ENSG00000185236,ENSG00000079805,ENSG00000143570
GO:0019904	protein domain specific binding	molecular_function	0.031394	0.68291	48	1033	688	19500	ENSG00000148737,ENSG00000172936,ENSG00000137275,ENSG00000082898,ENSG00000096384,ENSG00000079819,ENSG00000063244,ENSG00000005075,ENSG00000198914,ENSG00000137497,ENSG00000087088,ENSG00000196588,ENSG00000080845,ENSG00000062598,ENSG00000173039,ENSG00000204371,ENSG00000181790,ENSG00000175866,ENSG00000028277,ENSG00000160014,ENSG00000275700,ENSG00000100151,ENSG00000196405,ENSG00000141480,ENSG00000137078…
GO:0046467	membrane lipid biosynthetic process	biological_process	0.031529	0.68469	13	1033	138	19500	ENSG00000108474,ENSG00000176170,ENSG00000160408,ENSG00000103056,ENSG00000110080,ENSG00000066322,ENSG00000165282,ENSG00000007541,ENSG00000172057,ENSG00000184381,ENSG00000115525,ENSG00000119227,ENSG00000136699
GO:1903507	negative regulation of nucleic acid-templated transcription	biological_process	0.03154	0.68469	84	1033	1297	19500	ENSG00000116670,ENSG00000185499,ENSG00000171467,ENSG00000149600,ENSG00000130427,ENSG00000179583,ENSG00000068903,ENSG00000079999,ENSG00000169242,ENSG00000006194,ENSG00000120057,ENSG00000187446,ENSG00000188779,ENSG00000116580,ENSG00000160685,ENSG00000167548,ENSG00000125347,ENSG00000158941,ENSG00000181218,ENSG00000129757,ENSG00000197114,ENSG00000127528,ENSG00000137309,ENSG00000141644,ENSG00000166851…
GO:0043177	organic acid binding	molecular_function	0.031664	0.68667	18	1033	211	19500	ENSG00000181790,ENSG00000141522,ENSG00000143546,ENSG00000181396,ENSG00000076555,ENSG00000166900,ENSG00000117385,ENSG00000182199,ENSG00000137880,ENSG00000239282,ENSG00000108953,ENSG00000226124,ENSG00000124713,ENSG00000164687,ENSG00000111325,ENSG00000172482,ENSG00000073060,ENSG00000167851
GO:0030030	cell projection organization	biological_process	0.031751	0.68739	90	1033	1401	19500	ENSG00000185324,ENSG00000079974,ENSG00000141837,ENSG00000113763,ENSG00000167646,ENSG00000196588,ENSG00000135441,ENSG00000089820,ENSG00000172757,ENSG00000102882,ENSG00000165802,ENSG00000177169,ENSG00000112655,ENSG00000032742,ENSG00000160691,ENSG00000188277,ENSG00000130175,ENSG00000085733,ENSG00000071051,ENSG00000184014,ENSG00000109083,ENSG00000011009,ENSG00000165699,ENSG00000100151,ENSG00000258947…
GO:0044087	regulation of cellular component biogenesis	biological_process	0.031761	0.68739	59	1033	872	19500	ENSG00000128283,ENSG00000149798,ENSG00000172534,ENSG00000004478,ENSG00000136717,ENSG00000068903,ENSG00000135924,ENSG00000184640,ENSG00000151208,ENSG00000155366,ENSG00000079805,ENSG00000197879,ENSG00000187535,ENSG00000102879,ENSG00000105327,ENSG00000103056,ENSG00000087274,ENSG00000054654,ENSG00000090339,ENSG00000042493,ENSG00000167965,ENSG00000148356,ENSG00000015285,ENSG00000184381,ENSG00000157227…
GO:0002275	myeloid cell activation involved in immune response	biological_process	0.031838	0.68834	39	1033	541	19500	ENSG00000244038,ENSG00000086730,ENSG00000170909,ENSG00000169692,ENSG00000011422,ENSG00000213658,ENSG00000067225,ENSG00000143546,ENSG00000204435,ENSG00000171298,ENSG00000196230,ENSG00000185627,ENSG00000116815,ENSG00000143621,ENSG00000100321,ENSG00000051523,ENSG00000136279,ENSG00000101425,ENSG00000124570,ENSG00000122986,ENSG00000147533,ENSG00000167613,ENSG00000064601,ENSG00000149925,ENSG00000106244…
GO:0010256	endomembrane system organization	biological_process	0.031938	0.68864	42	1033	590	19500	ENSG00000160948,ENSG00000136717,ENSG00000141551,ENSG00000171552,ENSG00000107862,ENSG00000123384,ENSG00000122679,ENSG00000106976,ENSG00000100321,ENSG00000079805,ENSG00000166900,ENSG00000179364,ENSG00000108639,ENSG00000197562,ENSG00000054654,ENSG00000102898,ENSG00000168890,ENSG00000196924,ENSG00000011243,ENSG00000100242,ENSG00000127533,ENSG00000102882,ENSG00000132329,ENSG00000135441,ENSG00000087903…
GO:0031577	spindle checkpoint	biological_process	0.031949	0.68864	5	1033	34	19500	ENSG00000166851,ENSG00000110200,ENSG00000154473,ENSG00000071539,ENSG00000116670
GO:1902100	negative regulation of metaphase/anaphase transition of cell cycle	biological_process	0.031949	0.68864	5	1033	34	19500	ENSG00000116670,ENSG00000071539,ENSG00000154473,ENSG00000166851,ENSG00000110200
GO:0006862	nucleotide transport	biological_process	0.032075	0.69065	5	1033	34	19500	ENSG00000181830,ENSG00000125648,ENSG00000176087,ENSG00000157593,ENSG00000102100
GO:0031410	cytoplasmic vesicle	cellular_component	0.032284	0.69446	108	1033	1715	19500	ENSG00000149131,ENSG00000096384,ENSG00000084207,ENSG00000137880,ENSG00000167110,ENSG00000068001,ENSG00000172232,ENSG00000168003,ENSG00000185825,ENSG00000102225,ENSG00000196743,ENSG00000167851,ENSG00000164687,ENSG00000172432,ENSG00000145740,ENSG00000160803,ENSG00000167302,ENSG00000149925,ENSG00000160014,ENSG00000143740,ENSG00000069424,ENSG00000172057,ENSG00000185236,ENSG00000198825,ENSG00000175866…
GO:0044089	positive regulation of cellular component biogenesis	biological_process	0.032378	0.69577	36	1033	493	19500	ENSG00000121753,ENSG00000137497,ENSG00000087088,ENSG00000085733,ENSG00000071051,ENSG00000181790,ENSG00000177169,ENSG00000175866,ENSG00000188277,ENSG00000100151,ENSG00000174775,ENSG00000108518,ENSG00000196405,ENSG00000135100,ENSG00000133216,ENSG00000068971,ENSG00000100721,ENSG00000158321,ENSG00000165699,ENSG00000197879,ENSG00000079805,ENSG00000136717,ENSG00000128283,ENSG00000149798,ENSG00000151208…
GO:0031965	nuclear membrane	cellular_component	0.032624	0.69991	24	1033	303	19500	ENSG00000100242,ENSG00000165802,ENSG00000091732,ENSG00000171552,ENSG00000135924,ENSG00000167895,ENSG00000157349,ENSG00000135124,ENSG00000137880,ENSG00000082898,ENSG00000064419,ENSG00000100401,ENSG00000164068,ENSG00000083454,ENSG00000054654,ENSG00000167302,ENSG00000102898,ENSG00000143578,ENSG00000176438,ENSG00000132518,ENSG00000052749,ENSG00000074370,ENSG00000124688,ENSG00000160789
GO:0016853	isomerase activity	molecular_function	0.032637	0.69991	14	1033	153	19500	ENSG00000163382,ENSG00000177192,ENSG00000154330,ENSG00000105701,ENSG00000007376,ENSG00000117308,ENSG00000155660,ENSG00000100023,ENSG00000178922,ENSG00000111669,ENSG00000156990,ENSG00000100605,ENSG00000004478,ENSG00000123179
GO:0043549	regulation of kinase activity	biological_process	0.032915	0.70482	58	1033	857	19500	ENSG00000136279,ENSG00000198909,ENSG00000065361,ENSG00000175920,ENSG00000106462,ENSG00000141506,ENSG00000084764,ENSG00000034152,ENSG00000130427,ENSG00000204673,ENSG00000266173,ENSG00000169727,ENSG00000169242,ENSG00000128563,ENSG00000204435,ENSG00000138835,ENSG00000213658,ENSG00000120899,ENSG00000167965,ENSG00000187446,ENSG00000170315,ENSG00000110651,ENSG00000197299,ENSG00000105647,ENSG00000120875…
GO:0006403	RNA localization	biological_process	0.032932	0.70482	17	1033	197	19500	ENSG00000014164,ENSG00000198563,ENSG00000132507,ENSG00000157349,ENSG00000082898,ENSG00000138757,ENSG00000063244,ENSG00000169371,ENSG00000197879,ENSG00000162385,ENSG00000128311,ENSG00000005007,ENSG00000165699,ENSG00000102898,ENSG00000011243,ENSG00000116350,ENSG00000205323
GO:0015031	protein transport	biological_process	0.032994	0.70511	113	1033	1804	19500	ENSG00000133138,ENSG00000174775,ENSG00000169180,ENSG00000187486,ENSG00000135100,ENSG00000124104,ENSG00000100083,ENSG00000147533,ENSG00000185236,ENSG00000071054,ENSG00000102225,ENSG00000242247,ENSG00000148737,ENSG00000100139,ENSG00000082898,ENSG00000143882,ENSG00000096384,ENSG00000132881,ENSG00000185825,ENSG00000169371,ENSG00000114745,ENSG00000068001,ENSG00000162298,ENSG00000054356,ENSG00000143774…
GO:0006508	proteolysis	biological_process	0.033012	0.70511	115	1033	1839	19500	ENSG00000052344,ENSG00000127948,ENSG00000124570,ENSG00000241878,ENSG00000160803,ENSG00000126247,ENSG00000142327,ENSG00000168159,ENSG00000185825,ENSG00000167770,ENSG00000162298,ENSG00000172232,ENSG00000159202,ENSG00000154473,ENSG00000096384,ENSG00000149131,ENSG00000005486,ENSG00000204264,ENSG00000142002,ENSG00000105327,ENSG00000070770,ENSG00000142405,ENSG00000187045,ENSG00000133612,ENSG00000110651…
GO:1990267	response to transition metal nanoparticle	biological_process	0.033051	0.70523	13	1033	139	19500	ENSG00000145740,ENSG00000134013,ENSG00000135124,ENSG00000213145,ENSG00000143546,ENSG00000013573,ENSG00000125148,ENSG00000160211,ENSG00000173039,ENSG00000165915,ENSG00000100300,ENSG00000090339,ENSG00000122986
GO:0051592	response to calcium ion	biological_process	0.033166	0.70697	13	1033	139	19500	ENSG00000120899,ENSG00000197586,ENSG00000125648,ENSG00000160014,ENSG00000215021,ENSG00000120049,ENSG00000165125,ENSG00000162517,ENSG00000170345,ENSG00000171121,ENSG00000087274,ENSG00000122359,ENSG00000130522
GO:0044271	cellular nitrogen compound biosynthetic process	biological_process	0.033339	0.70995	289	1033	4971	19500	ENSG00000168159,ENSG00000056586,ENSG00000165821,ENSG00000113716,ENSG00000213999,ENSG00000125952,ENSG00000165804,ENSG00000068001,ENSG00000115525,ENSG00000196498,ENSG00000135365,ENSG00000166188,ENSG00000064313,ENSG00000149925,ENSG00000066136,ENSG00000108840,ENSG00000049541,ENSG00000196235,ENSG00000160014,ENSG00000102908,ENSG00000171466,ENSG00000165702,ENSG00000188486,ENSG00000124664,ENSG00000111642…
GO:0030641	regulation of cellular pH	biological_process	0.033432	0.71078	9	1033	84	19500	ENSG00000187446,ENSG00000181045,ENSG00000136710,ENSG00000139832,ENSG00000102882,ENSG00000135740,ENSG00000102805,ENSG00000171130,ENSG00000117410
GO:0002237	response to molecule of bacterial origin	biological_process	0.033445	0.71078	26	1033	335	19500	ENSG00000013725,ENSG00000005007,ENSG00000131871,ENSG00000090339,ENSG00000100300,ENSG00000186827,ENSG00000110324,ENSG00000137496,ENSG00000170345,ENSG00000108840,ENSG00000112799,ENSG00000143546,ENSG00000157873,ENSG00000130522,ENSG00000114738,ENSG00000102882,ENSG00000159674,ENSG00000130427,ENSG00000073060,ENSG00000068903,ENSG00000173039,ENSG00000105298,ENSG00000172936,ENSG00000084207,ENSG00000120949…
GO:0019438	aromatic compound biosynthetic process	biological_process	0.034018	0.72223	255	1033	4352	19500	ENSG00000111843,ENSG00000087087,ENSG00000196418,ENSG00000156587,ENSG00000106006,ENSG00000169242,ENSG00000175221,ENSG00000179583,ENSG00000149600,ENSG00000171467,ENSG00000143621,ENSG00000133250,ENSG00000105701,ENSG00000116670,ENSG00000020256,ENSG00000163382,ENSG00000181218,ENSG00000106992,ENSG00000007237,ENSG00000089335,ENSG00000241837,ENSG00000125347,ENSG00000188779,ENSG00000172888,ENSG00000116580…
GO:0008643	carbohydrate transport	biological_process	0.034283	0.72315	14	1033	154	19500	ENSG00000135100,ENSG00000181830,ENSG00000105647,ENSG00000165699,ENSG00000169241,ENSG00000077463,ENSG00000163884,ENSG00000164687,ENSG00000131871,ENSG00000164362,ENSG00000142330,ENSG00000102100,ENSG00000143595,ENSG00000176087
GO:0030117	membrane coat	cellular_component	0.03457	0.72315	10	1033	98	19500	ENSG00000100083,ENSG00000161203,ENSG00000100478,ENSG00000127527,ENSG00000162517,ENSG00000167302,ENSG00000106976,ENSG00000142186,ENSG00000042753,ENSG00000125447
GO:0048475	coated membrane	cellular_component	0.03457	0.72315	10	1033	98	19500	ENSG00000100083,ENSG00000161203,ENSG00000167302,ENSG00000162517,ENSG00000106976,ENSG00000142186,ENSG00000042753,ENSG00000125447,ENSG00000127527,ENSG00000100478
GO:2001243	negative regulation of intrinsic apoptotic signaling pathway	biological_process	0.034576	0.72315	10	1033	98	19500	ENSG00000149428,ENSG00000171552,ENSG00000130427,ENSG00000158941,ENSG00000131871,ENSG00000011422,ENSG00000178719,ENSG00000213619,ENSG00000185499,ENSG00000162298
GO:0009117	nucleotide metabolic process	biological_process	0.034605	0.72315	45	1033	643	19500	ENSG00000186642,ENSG00000102125,ENSG00000140990,ENSG00000172992,ENSG00000163382,ENSG00000124357,ENSG00000106992,ENSG00000241837,ENSG00000182199,ENSG00000130414,ENSG00000141698,ENSG00000205309,ENSG00000100300,ENSG00000143774,ENSG00000161513,ENSG00000129071,ENSG00000125458,ENSG00000047230,ENSG00000067225,ENSG00000131446,ENSG00000132518,ENSG00000114353,ENSG00000138031,ENSG00000166548,ENSG00000077463…
GO:0008253	5'-nucleotidase activity	molecular_function	0.034613	0.72315	3	1033	14	19500	ENSG00000125458,ENSG00000141698,ENSG00000205309
GO:0097038	perinuclear endoplasmic reticulum	cellular_component	0.034629	0.72315	3	1033	14	19500	ENSG00000051523,ENSG00000158555,ENSG00000185825
GO:0048266	behavioral response to pain	biological_process	0.034696	0.72315	3	1033	14	19500	ENSG00000141837,ENSG00000135124,ENSG00000100300
GO:0008654	phospholipid biosynthetic process	biological_process	0.034712	0.72315	22	1033	274	19500	ENSG00000165282,ENSG00000161217,ENSG00000174915,ENSG00000171100,ENSG00000102125,ENSG00000108474,ENSG00000164687,ENSG00000069998,ENSG00000184381,ENSG00000198825,ENSG00000129219,ENSG00000168918,ENSG00000007541,ENSG00000241878,ENSG00000103502,ENSG00000169692,ENSG00000119227,ENSG00000145214,ENSG00000105647,ENSG00000143845,ENSG00000163344,ENSG00000143393
GO:0090153	regulation of sphingolipid biosynthetic process	biological_process	0.034734	0.72315	3	1033	14	19500	ENSG00000103056,ENSG00000184381,ENSG00000172057
GO:2000303	regulation of ceramide biosynthetic process	biological_process	0.034734	0.72315	3	1033	14	19500	ENSG00000184381,ENSG00000172057,ENSG00000103056
GO:1900242	regulation of synaptic vesicle endocytosis	biological_process	0.03474	0.72315	3	1033	14	19500	ENSG00000161203,ENSG00000160014,ENSG00000106976
GO:0031272	regulation of pseudopodium assembly	biological_process	0.034792	0.72315	3	1033	14	19500	ENSG00000188277,ENSG00000128283,ENSG00000149798
GO:0060544	regulation of necroptotic process	biological_process	0.034809	0.72315	3	1033	14	19500	ENSG00000137275,ENSG00000125826,ENSG00000129465
GO:0020027	hemoglobin metabolic process	biological_process	0.034825	0.72315	3	1033	14	19500	ENSG00000122641,ENSG00000087274,ENSG00000130427
GO:0015780	nucleotide-sugar transport	biological_process	0.034825	0.72315	3	1033	14	19500	ENSG00000181830,ENSG00000176087,ENSG00000102100
GO:0032794	GTPase activating protein binding	molecular_function	0.034825	0.72315	3	1033	14	19500	ENSG00000196230,ENSG00000165699,ENSG00000164050
GO:0070669	response to interleukin-2	biological_process	0.034825	0.72315	3	1033	14	19500	ENSG00000105639,ENSG00000160691,ENSG00000120899
GO:0048870	cell motility	biological_process	0.034907	0.72315	100	1033	1581	19500	ENSG00000182871,ENSG00000102409,ENSG00000172936,ENSG00000136732,ENSG00000196588,ENSG00000087088,ENSG00000089820,ENSG00000073060,ENSG00000129465,ENSG00000111186,ENSG00000213654,ENSG00000100242,ENSG00000138031,ENSG00000165802,ENSG00000172757,ENSG00000005844,ENSG00000102882,ENSG00000160691,ENSG00000112655,ENSG00000131504,ENSG00000160789,ENSG00000071051,ENSG00000149091,ENSG00000085733,ENSG00000180549…
GO:0051674	localization of cell	biological_process	0.034907	0.72315	100	1033	1581	19500	ENSG00000182957,ENSG00000143546,ENSG00000157227,ENSG00000105639,ENSG00000120899,ENSG00000108798,ENSG00000129219,ENSG00000039523,ENSG00000102879,ENSG00000146674,ENSG00000164050,ENSG00000198909,ENSG00000197879,ENSG00000128322,ENSG00000123159,ENSG00000100092,ENSG00000135124,ENSG00000116815,ENSG00000123384,ENSG00000176170,ENSG00000169242,ENSG00000176973,ENSG00000131504,ENSG00000160789,ENSG00000112655…
GO:0034654	nucleobase-containing compound biosynthetic process	biological_process	0.034929	0.72315	251	1033	4282	19500	ENSG00000079805,ENSG00000122641,ENSG00000142409,ENSG00000172992,ENSG00000071539,ENSG00000139613,ENSG00000181722,ENSG00000102125,ENSG00000086102,ENSG00000163349,ENSG00000106462,ENSG00000109854,ENSG00000061273,ENSG00000128917,ENSG00000140464,ENSG00000105011,ENSG00000166986,ENSG00000146285,ENSG00000167395,ENSG00000187045,ENSG00000047230,ENSG00000011243,ENSG00000070770,ENSG00000196924,ENSG00000110651…
GO:0044092	negative regulation of molecular function	biological_process	0.035009	0.72315	74	1033	1132	19500	ENSG00000087088,ENSG00000196588,ENSG00000102882,ENSG00000110200,ENSG00000129757,ENSG00000101266,ENSG00000172939,ENSG00000197114,ENSG00000166851,ENSG00000213923,ENSG00000165699,ENSG00000092871,ENSG00000133216,ENSG00000076555,ENSG00000141480,ENSG00000100767,ENSG00000148143,ENSG00000113648,ENSG00000166145,ENSG00000185527,ENSG00000114993,ENSG00000079999,ENSG00000130427,ENSG00000149600,ENSG00000169727…
GO:0046034	ATP metabolic process	biological_process	0.035262	0.72315	20	1033	244	19500	ENSG00000006695,ENSG00000149925,ENSG00000008130,ENSG00000004455,ENSG00000067225,ENSG00000167792,ENSG00000108515,ENSG00000106992,ENSG00000130414,ENSG00000143774,ENSG00000100300,ENSG00000241837,ENSG00000182199,ENSG00000102125,ENSG00000170906,ENSG00000140990,ENSG00000213619,ENSG00000125648,ENSG00000111669,ENSG00000077463
GO:0034097	response to cytokine	biological_process	0.035607	0.72315	74	1033	1133	19500	ENSG00000137496,ENSG00000105639,ENSG00000096996,ENSG00000120899,ENSG00000102879,ENSG00000166900,ENSG00000125347,ENSG00000182199,ENSG00000116815,ENSG00000185499,ENSG00000198909,ENSG00000139832,ENSG00000197879,ENSG00000120949,ENSG00000149798,ENSG00000130427,ENSG00000149600,ENSG00000175505,ENSG00000005206,ENSG00000079999,ENSG00000179583,ENSG00000176170,ENSG00000110324,ENSG00000160691,ENSG00000100721…
GO:0005876	spindle microtubule	cellular_component	0.035624	0.72315	7	1033	59	19500	ENSG00000137497,ENSG00000087586,ENSG00000126216,ENSG00000160014,ENSG00000141551,ENSG00000037042,ENSG00000166851
GO:1902041	regulation of extrinsic apoptotic signaling pathway via death domain receptors	biological_process	0.035638	0.72315	7	1033	59	19500	ENSG00000137275,ENSG00000092871,ENSG00000170633,ENSG00000101109,ENSG00000090339,ENSG00000167895,ENSG00000171552
GO:0070193	synaptonemal complex organization	biological_process	0.035645	0.72315	4	1033	24	19500	ENSG00000141696,ENSG00000166851,ENSG00000204371,ENSG00000071539
GO:0007178	transmembrane receptor protein serine/threonine kinase signaling pathway	biological_process	0.03568	0.72315	26	1033	337	19500	ENSG00000143375,ENSG00000188779,ENSG00000141480,ENSG00000135100,ENSG00000157110,ENSG00000168874,ENSG00000187045,ENSG00000120057,ENSG00000168522,ENSG00000170801,ENSG00000170345,ENSG00000170315,ENSG00000140464,ENSG00000137497,ENSG00000140564,ENSG00000102882,ENSG00000014164,ENSG00000176973,ENSG00000204435,ENSG00000105701,ENSG00000043143,ENSG00000129757,ENSG00000079805,ENSG00000122641,ENSG00000123159…
GO:0005031	tumor necrosis factor-activated receptor activity	molecular_function	0.035682	0.72315	4	1033	24	19500	ENSG00000157873,ENSG00000120949,ENSG00000186827,ENSG00000054967
GO:0005035	death receptor activity	molecular_function	0.035682	0.72315	4	1033	24	19500	ENSG00000157873,ENSG00000054967,ENSG00000186827,ENSG00000120949
GO:2000816	negative regulation of mitotic sister chromatid separation	biological_process	0.035711	0.72315	5	1033	35	19500	ENSG00000166851,ENSG00000110200,ENSG00000154473,ENSG00000071539,ENSG00000116670
GO:0005720	nuclear heterochromatin	cellular_component	0.035852	0.72315	5	1033	35	19500	ENSG00000204227,ENSG00000113648,ENSG00000077463,ENSG00000068903,ENSG00000125817
GO:0072698	protein localization to microtubule cytoskeleton	biological_process	0.035855	0.72315	5	1033	35	19500	ENSG00000141551,ENSG00000166963,ENSG00000131504,ENSG00000137497,ENSG00000087586
GO:0009101	glycoprotein biosynthetic process	biological_process	0.03594	0.72315	27	1033	353	19500	ENSG00000158089,ENSG00000117682,ENSG00000110080,ENSG00000244038,ENSG00000275700,ENSG00000105639,ENSG00000130175,ENSG00000131446,ENSG00000187446,ENSG00000126091,ENSG00000180549,ENSG00000135916,ENSG00000121578,ENSG00000160408,ENSG00000176383,ENSG00000077463,ENSG00000132329,ENSG00000068903,ENSG00000162298,ENSG00000185499,ENSG00000090581,ENSG00000114745,ENSG00000115525,ENSG00000167889,ENSG00000165905…
GO:0050542	icosanoid binding	molecular_function	0.036017	0.72315	2	1033	6	19500	ENSG00000143546,ENSG00000166900
GO:0050543	icosatetraenoic acid binding	molecular_function	0.036017	0.72315	2	1033	6	19500	ENSG00000143546,ENSG00000166900
GO:1901567	fatty acid derivative binding	molecular_function	0.036017	0.72315	2	1033	6	19500	ENSG00000166900,ENSG00000143546
GO:0031145	anaphase-promoting complex-dependent proteasomal ubiquitin-dependent protein catabolic process	biological_process	0.036035	0.72315	8	1033	72	19500	ENSG00000116670,ENSG00000089053,ENSG00000071539,ENSG00000087586,ENSG00000154473,ENSG00000166851,ENSG00000170315,ENSG00000110200
GO:0097642	calcitonin family receptor activity	molecular_function	0.036046	0.72315	2	1033	6	19500	ENSG00000132329,ENSG00000122679
GO:1990542	mitochondrial transmembrane transport	biological_process	0.036087	0.72315	8	1033	72	19500	ENSG00000241837,ENSG00000107745,ENSG00000156026,ENSG00000183172,ENSG00000076555,ENSG00000197119,ENSG00000125648,ENSG00000130204
GO:0022892	substrate-specific transporter activity	molecular_function	0.036119	0.72315	75	1033	1151	19500	ENSG00000165915,ENSG00000241837,ENSG00000159212,ENSG00000120899,ENSG00000100991,ENSG00000169682,ENSG00000165125,ENSG00000137266,ENSG00000259803,ENSG00000040487,ENSG00000123384,ENSG00000169241,ENSG00000064419,ENSG00000101187,ENSG00000135124,ENSG00000122679,ENSG00000042753,ENSG00000122986,ENSG00000173826,ENSG00000156026,ENSG00000114770,ENSG00000142959,ENSG00000006695,ENSG00000184014,ENSG00000112759…
GO:0010942	positive regulation of cell death	biological_process	0.036122	0.72315	47	1033	678	19500	ENSG00000071051,ENSG00000136305,ENSG00000101109,ENSG00000160570,ENSG00000141480,ENSG00000132694,ENSG00000159202,ENSG00000182871,ENSG00000137275,ENSG00000141968,ENSG00000185825,ENSG00000274897,ENSG00000173327,ENSG00000140961,ENSG00000068001,ENSG00000182872,ENSG00000087088,ENSG00000129465,ENSG00000170315,ENSG00000135916,ENSG00000170345,ENSG00000011422,ENSG00000168918,ENSG00000143546,ENSG00000142405…
GO:0003057	regulation of the force of heart contraction by chemical signal	biological_process	0.036122	0.72315	2	1033	6	19500	ENSG00000173020,ENSG00000127129
GO:0016126	sterol biosynthetic process	biological_process	0.036134	0.72315	8	1033	72	19500	ENSG00000127948,ENSG00000163344,ENSG00000076555,ENSG00000072310,ENSG00000160211,ENSG00000066136,ENSG00000132196,ENSG00000166394
GO:1990446	U1 snRNP binding	molecular_function	0.036227	0.72315	2	1033	6	19500	ENSG00000077312,ENSG00000104852
GO:0009186	deoxyribonucleoside diphosphate metabolic process	biological_process	0.036247	0.72315	2	1033	6	19500	ENSG00000143774,ENSG00000275074
GO:0042985	negative regulation of amyloid precursor protein biosynthetic process	biological_process	0.036286	0.72315	2	1033	6	19500	ENSG00000135916,ENSG00000275700
GO:0071797	LUBAC complex	cellular_component	0.036327	0.72315	2	1033	6	19500	ENSG00000125826,ENSG00000179526
GO:0047499	calcium-independent phospholipase A2 activity	molecular_function	0.036332	0.72315	2	1033	6	19500	ENSG00000184381,ENSG00000103066
GO:0004704	NF-kappaB-inducing kinase activity	molecular_function	0.03641	0.72315	2	1033	6	19500	ENSG00000149923,ENSG00000129465
GO:0090205	positive regulation of cholesterol metabolic process	biological_process	0.036422	0.72315	2	1033	6	19500	ENSG00000072310,ENSG00000127948
GO:0042500	aspartic endopeptidase activity, intramembrane cleaving	molecular_function	0.036436	0.72315	2	1033	6	19500	ENSG00000005206,ENSG00000101294
GO:0071458	integral component of cytoplasmic side of endoplasmic reticulum membrane	cellular_component	0.036436	0.72315	2	1033	6	19500	ENSG00000005206,ENSG00000101294
GO:0072683	T cell extravasation	biological_process	0.036449	0.72315	2	1033	6	19500	ENSG00000090339,ENSG00000129465
GO:2000197	regulation of ribonucleoprotein complex localization	biological_process	0.036451	0.72315	2	1033	6	19500	ENSG00000011243,ENSG00000014164
GO:1904415	regulation of xenophagy	biological_process	0.036465	0.72315	2	1033	6	19500	ENSG00000148356,ENSG00000102882
GO:1904417	positive regulation of xenophagy	biological_process	0.036465	0.72315	2	1033	6	19500	ENSG00000148356,ENSG00000102882
GO:1903332	regulation of protein folding	biological_process	0.036469	0.72315	2	1033	6	19500	ENSG00000104852,ENSG00000135924
GO:1903431	positive regulation of cell maturation	biological_process	0.036478	0.72315	2	1033	6	19500	ENSG00000087586,ENSG00000068903
GO:0070244	negative regulation of thymocyte apoptotic process	biological_process	0.036479	0.72315	2	1033	6	19500	ENSG00000105639,ENSG00000169242
GO:0019237	centromeric DNA binding	molecular_function	0.036479	0.72315	2	1033	6	19500	ENSG00000142945,ENSG00000125817
GO:0004767	sphingomyelin phosphodiesterase activity	molecular_function	0.036479	0.72315	2	1033	6	19500	ENSG00000103056,ENSG00000136699
GO:0006685	sphingomyelin catabolic process	biological_process	0.036479	0.72315	2	1033	6	19500	ENSG00000103056,ENSG00000136699
GO:0000835	ER ubiquitin ligase complex	cellular_component	0.036479	0.72315	2	1033	6	19500	ENSG00000135506,ENSG00000162298
GO:0042866	pyruvate biosynthetic process	biological_process	0.036479	0.72315	2	1033	6	19500	ENSG00000067225,ENSG00000172482
GO:0001739	sex chromatin	cellular_component	0.036479	0.72315	2	1033	6	19500	ENSG00000204227,ENSG00000113648
GO:0008889	glycerophosphodiester phosphodiesterase activity	molecular_function	0.036479	0.72315	2	1033	6	19500	ENSG00000006007,ENSG00000158555
GO:0035312	5'-3' exodeoxyribonuclease activity	molecular_function	0.036479	0.72315	2	1033	6	19500	ENSG00000152457,ENSG00000118655
GO:0048406	nerve growth factor binding	molecular_function	0.036479	0.72315	2	1033	6	19500	ENSG00000140564,ENSG00000120949
GO:1903525	regulation of membrane tubulation	biological_process	0.036479	0.72315	2	1033	6	19500	ENSG00000079805,ENSG00000116786
GO:2001046	positive regulation of integrin-mediated signaling pathway	biological_process	0.036479	0.72315	2	1033	6	19500	ENSG00000196924,ENSG00000072163
GO:0031327	negative regulation of cellular biosynthetic process	biological_process	0.03681	0.72903	103	1033	1637	19500	ENSG00000165702,ENSG00000071564,ENSG00000188486,ENSG00000172534,ENSG00000061273,ENSG00000140464,ENSG00000128917,ENSG00000124664,ENSG00000111642,ENSG00000134013,ENSG00000125826,ENSG00000086102,ENSG00000186642,ENSG00000106462,ENSG00000122641,ENSG00000175550,ENSG00000078699,ENSG00000173933,ENSG00000139613,ENSG00000181722,ENSG00000109118,ENSG00000257949,ENSG00000005007,ENSG00000134283,ENSG00000100300…
GO:0005795	Golgi stack	cellular_component	0.037096	0.73337	12	1033	127	19500	ENSG00000110080,ENSG00000103056,ENSG00000011009,ENSG00000130733,ENSG00000165861,ENSG00000107862,ENSG00000147533,ENSG00000126091,ENSG00000180549,ENSG00000121578,ENSG00000167110,ENSG00000185825
GO:0071345	cellular response to cytokine stimulus	biological_process	0.037098	0.73337	69	1033	1050	19500	ENSG00000068001,ENSG00000167770,ENSG00000105298,ENSG00000141968,ENSG00000084207,ENSG00000096384,ENSG00000087903,ENSG00000125148,ENSG00000187486,ENSG00000100321,ENSG00000051523,ENSG00000125826,ENSG00000163349,ENSG00000186642,ENSG00000140464,ENSG00000171552,ENSG00000204435,ENSG00000110876,ENSG00000127129,ENSG00000168918,ENSG00000142405,ENSG00000015285,ENSG00000170315,ENSG00000169692,ENSG00000136699…
GO:0005793	endoplasmic reticulum-Golgi intermediate compartment	cellular_component	0.037173	0.73342	11	1033	113	19500	ENSG00000114745,ENSG00000174871,ENSG00000185825,ENSG00000162236,ENSG00000187446,ENSG00000167110,ENSG00000142186,ENSG00000136710,ENSG00000107862,ENSG00000125991,ENSG00000141551
GO:0051338	regulation of transferase activity	biological_process	0.037205	0.73342	65	1033	982	19500	ENSG00000100100,ENSG00000167851,ENSG00000154473,ENSG00000096384,ENSG00000084207,ENSG00000167110,ENSG00000114745,ENSG00000172232,ENSG00000068001,ENSG00000110931,ENSG00000104814,ENSG00000174775,ENSG00000101109,ENSG00000163945,ENSG00000145214,ENSG00000160014,ENSG00000071054,ENSG00000049541,ENSG00000128563,ENSG00000204435,ENSG00000204673,ENSG00000106462,ENSG00000034152,ENSG00000071539,ENSG00000065361…
GO:0019207	kinase regulator activity	molecular_function	0.037226	0.73342	18	1033	215	19500	ENSG00000160014,ENSG00000113648,ENSG00000167965,ENSG00000187446,ENSG00000101109,ENSG00000145214,ENSG00000105647,ENSG00000100721,ENSG00000068001,ENSG00000129757,ENSG00000065361,ENSG00000084207,ENSG00000096384,ENSG00000141506,ENSG00000130427,ENSG00000266173,ENSG00000128563,ENSG00000204435
GO:0006139	nucleobase-containing compound metabolic process	biological_process	0.037239	0.73342	337	1033	5867	19500	ENSG00000104852,ENSG00000102034,ENSG00000109118,ENSG00000054356,ENSG00000257949,ENSG00000137843,ENSG00000005007,ENSG00000105647,ENSG00000205309,ENSG00000130414,ENSG00000204227,ENSG00000186642,ENSG00000134013,ENSG00000186446,ENSG00000034152,ENSG00000173933,ENSG00000013573,ENSG00000160741,ENSG00000078699,ENSG00000188486,ENSG00000165702,ENSG00000171466,ENSG00000124664,ENSG00000111642,ENSG00000108840…
GO:0010605	negative regulation of macromolecule metabolic process	biological_process	0.037487	0.73761	164	1033	2718	19500	ENSG00000116670,ENSG00000105701,ENSG00000087087,ENSG00000170633,ENSG00000169727,ENSG00000160948,ENSG00000169242,ENSG00000149600,ENSG00000179583,ENSG00000171467,ENSG00000187446,ENSG00000120057,ENSG00000181218,ENSG00000125347,ENSG00000188779,ENSG00000182134,ENSG00000116580,ENSG00000171100,ENSG00000166851,ENSG00000127528,ENSG00000197114,ENSG00000129757,ENSG00000274897,ENSG00000063244,ENSG00000182872…
GO:0009141	nucleoside triphosphate metabolic process	biological_process	0.037622	0.73957	23	1033	292	19500	ENSG00000006695,ENSG00000149925,ENSG00000008130,ENSG00000004455,ENSG00000067225,ENSG00000106348,ENSG00000047230,ENSG00000167792,ENSG00000108515,ENSG00000106992,ENSG00000130414,ENSG00000143774,ENSG00000100300,ENSG00000130717,ENSG00000241837,ENSG00000182199,ENSG00000170906,ENSG00000102125,ENSG00000140990,ENSG00000213619,ENSG00000125648,ENSG00000111669,ENSG00000077463
GO:0098771	inorganic ion homeostasis	biological_process	0.037686	0.73957	47	1033	680	19500	ENSG00000107745,ENSG00000156026,ENSG00000125148,ENSG00000131504,ENSG00000017260,ENSG00000160014,ENSG00000145740,ENSG00000078369,ENSG00000117410,ENSG00000178752,ENSG00000087088,ENSG00000135740,ENSG00000167895,ENSG00000171130,ENSG00000102805,ENSG00000127533,ENSG00000102882,ENSG00000125648,ENSG00000185825,ENSG00000068001,ENSG00000141837,ENSG00000181045,ENSG00000083454,ENSG00000165915,ENSG00000183172…
GO:0010558	negative regulation of macromolecule biosynthetic process	biological_process	0.037741	0.73957	99	1033	1569	19500	ENSG00000116670,ENSG00000185499,ENSG00000130427,ENSG00000149600,ENSG00000179583,ENSG00000079999,ENSG00000068903,ENSG00000171467,ENSG00000169242,ENSG00000105639,ENSG00000006194,ENSG00000120057,ENSG00000187446,ENSG00000125347,ENSG00000158941,ENSG00000131871,ENSG00000188779,ENSG00000116580,ENSG00000167548,ENSG00000160685,ENSG00000181218,ENSG00000129757,ENSG00000141644,ENSG00000166851,ENSG00000137309…
GO:0006605	protein targeting	biological_process	0.037877	0.73957	41	1033	581	19500	ENSG00000095321,ENSG00000169371,ENSG00000068001,ENSG00000138757,ENSG00000100139,ENSG00000096384,ENSG00000135506,ENSG00000147533,ENSG00000174775,ENSG00000160789,ENSG00000140464,ENSG00000079999,ENSG00000172482,ENSG00000108953,ENSG00000176973,ENSG00000160948,ENSG00000229117,ENSG00000130204,ENSG00000197879,ENSG00000163812,ENSG00000064419,ENSG00000163930,ENSG00000100321,ENSG00000100478,ENSG00000090581…
GO:0006672	ceramide metabolic process	biological_process	0.038082	0.73957	9	1033	86	19500	ENSG00000160408,ENSG00000103056,ENSG00000196743,ENSG00000172057,ENSG00000115525,ENSG00000184381,ENSG00000136699,ENSG00000103066,ENSG00000180549
GO:0098800	inner mitochondrial membrane protein complex	cellular_component	0.038187	0.73957	13	1033	142	19500	ENSG00000174886,ENSG00000170906,ENSG00000213619,ENSG00000140990,ENSG00000197912,ENSG00000130414,ENSG00000241837,ENSG00000105341,ENSG00000156026,ENSG00000107745,ENSG00000167792,ENSG00000183172,ENSG00000156411
GO:1900180	regulation of protein localization to nucleus	biological_process	0.038501	0.73957	13	1033	142	19500	ENSG00000138757,ENSG00000160789,ENSG00000068001,ENSG00000146232,ENSG00000187446,ENSG00000096384,ENSG00000186642,ENSG00000102898,ENSG00000166851,ENSG00000105647,ENSG00000079999,ENSG00000157110,ENSG00000176973
GO:0006753	nucleoside phosphate metabolic process	biological_process	0.038597	0.73957	45	1033	648	19500	ENSG00000167792,ENSG00000108515,ENSG00000275074,ENSG00000076555,ENSG00000130717,ENSG00000160211,ENSG00000149925,ENSG00000006695,ENSG00000008130,ENSG00000157593,ENSG00000004455,ENSG00000160014,ENSG00000106348,ENSG00000069424,ENSG00000138031,ENSG00000111669,ENSG00000166548,ENSG00000077463,ENSG00000170906,ENSG00000213619,ENSG00000138621,ENSG00000125648,ENSG00000173540,ENSG00000124357,ENSG00000106992…
GO:0006283	transcription-coupled nucleotide-excision repair	biological_process	0.038663	0.73957	8	1033	73	19500	ENSG00000163945,ENSG00000170315,ENSG00000175482,ENSG00000049541,ENSG00000005075,ENSG00000077514,ENSG00000169727,ENSG00000100142
GO:0031325	positive regulation of cellular metabolic process	biological_process	0.038791	0.73957	187	1033	3134	19500	ENSG00000196235,ENSG00000049541,ENSG00000102908,ENSG00000160014,ENSG00000275700,ENSG00000066136,ENSG00000108840,ENSG00000176087,ENSG00000181790,ENSG00000064313,ENSG00000160360,ENSG00000172232,ENSG00000068001,ENSG00000114745,ENSG00000165804,ENSG00000213999,ENSG00000167110,ENSG00000165821,ENSG00000084207,ENSG00000137270,ENSG00000125952,ENSG00000169689,ENSG00000168159,ENSG00000198914,ENSG00000114353…
GO:1901796	regulation of signal transduction by p53 class mediator	biological_process	0.039033	0.73957	12	1033	128	19500	ENSG00000204435,ENSG00000092871,ENSG00000170633,ENSG00000140464,ENSG00000064313,ENSG00000101266,ENSG00000170315,ENSG00000163349,ENSG00000087586,ENSG00000185499,ENSG00000088325,ENSG00000070770
GO:0034645	cellular macromolecule biosynthetic process	biological_process	0.039045	0.73957	294	1033	5081	19500	ENSG00000168159,ENSG00000169689,ENSG00000056586,ENSG00000165821,ENSG00000167110,ENSG00000213999,ENSG00000113716,ENSG00000125952,ENSG00000165804,ENSG00000068001,ENSG00000114745,ENSG00000115525,ENSG00000110080,ENSG00000196498,ENSG00000135365,ENSG00000064313,ENSG00000166188,ENSG00000066136,ENSG00000108840,ENSG00000049541,ENSG00000196235,ENSG00000102908,ENSG00000171466,ENSG00000165702,ENSG00000188486…
GO:0032675	regulation of interleukin-6 production	biological_process	0.039218	0.73957	11	1033	114	19500	ENSG00000127528,ENSG00000172936,ENSG00000181722,ENSG00000068001,ENSG00000142405,ENSG00000051523,ENSG00000168918,ENSG00000141480,ENSG00000101425,ENSG00000159674,ENSG00000131871
GO:0009262	deoxyribonucleotide metabolic process	biological_process	0.039698	0.73957	5	1033	36	19500	ENSG00000205309,ENSG00000143774,ENSG00000129071,ENSG00000275074,ENSG00000125458
GO:0003954	NADH dehydrogenase activity	molecular_function	0.039728	0.73957	6	1033	48	19500	ENSG00000167792,ENSG00000170906,ENSG00000213619,ENSG00000140990,ENSG00000103245,ENSG00000130414
GO:0033046	negative regulation of sister chromatid segregation	biological_process	0.039734	0.73957	5	1033	36	19500	ENSG00000166851,ENSG00000110200,ENSG00000154473,ENSG00000071539,ENSG00000116670
GO:0033048	negative regulation of mitotic sister chromatid segregation	biological_process	0.039734	0.73957	5	1033	36	19500	ENSG00000166851,ENSG00000110200,ENSG00000154473,ENSG00000071539,ENSG00000116670
GO:1902679	negative regulation of RNA biosynthetic process	biological_process	0.03977	0.73957	84	1033	1312	19500	ENSG00000061273,ENSG00000124664,ENSG00000111642,ENSG00000140464,ENSG00000128917,ENSG00000071564,ENSG00000165702,ENSG00000172534,ENSG00000188486,ENSG00000078699,ENSG00000175550,ENSG00000181722,ENSG00000139613,ENSG00000086102,ENSG00000125826,ENSG00000134013,ENSG00000186642,ENSG00000106462,ENSG00000072310,ENSG00000204227,ENSG00000111676,ENSG00000186827,ENSG00000109118,ENSG00000134283,ENSG00000215021…
GO:0033572	transferrin transport	biological_process	0.039812	0.73957	5	1033	36	19500	ENSG00000185236,ENSG00000079805,ENSG00000117410,ENSG00000171130,ENSG00000143882
GO:0006739	NADP metabolic process	biological_process	0.039825	0.73957	5	1033	36	19500	ENSG00000008130,ENSG00000161513,ENSG00000163382,ENSG00000160211,ENSG00000069424
GO:1902116	negative regulation of organelle assembly	biological_process	0.039876	0.73957	5	1033	36	19500	ENSG00000171100,ENSG00000204371,ENSG00000185324,ENSG00000079805,ENSG00000139437
GO:0070670	response to interleukin-4	biological_process	0.039882	0.73957	5	1033	36	19500	ENSG00000102879,ENSG00000096384,ENSG00000105639,ENSG00000079999,ENSG00000140464
GO:0006629	lipid metabolic process	biological_process	0.039891	0.73957	89	1033	1399	19500	ENSG00000163344,ENSG00000129219,ENSG00000120899,ENSG00000099998,ENSG00000176170,ENSG00000072506,ENSG00000123384,ENSG00000068903,ENSG00000160408,ENSG00000118961,ENSG00000149527,ENSG00000141506,ENSG00000133317,ENSG00000165782,ENSG00000011009,ENSG00000117682,ENSG00000076555,ENSG00000113648,ENSG00000064601,ENSG00000121578,ENSG00000149091,ENSG00000180549,ENSG00000087088,ENSG00000178752,ENSG00000108474…
GO:0071219	cellular response to molecule of bacterial origin	biological_process	0.039895	0.73957	15	1033	172	19500	ENSG00000013725,ENSG00000005007,ENSG00000102882,ENSG00000100300,ENSG00000090339,ENSG00000159674,ENSG00000131871,ENSG00000068903,ENSG00000173039,ENSG00000073060,ENSG00000172936,ENSG00000105298,ENSG00000108840,ENSG00000084207,ENSG00000112799
GO:0030119	AP-type membrane coat adaptor complex	cellular_component	0.03999	0.73957	6	1033	48	19500	ENSG00000100478,ENSG00000100083,ENSG00000161203,ENSG00000042753,ENSG00000125447,ENSG00000167302
GO:2001239	regulation of extrinsic apoptotic signaling pathway in absence of ligand	biological_process	0.040046	0.73957	6	1033	48	19500	ENSG00000137275,ENSG00000171552,ENSG00000091732,ENSG00000087088,ENSG00000164362,ENSG00000122641
GO:0034260	negative regulation of GTPase activity	biological_process	0.040068	0.73957	6	1033	48	19500	ENSG00000160360,ENSG00000114993,ENSG00000165699,ENSG00000174775,ENSG00000141480,ENSG00000169727
GO:0009889	regulation of biosynthetic process	biological_process	0.040156	0.73957	261	1033	4480	19500	ENSG00000122641,ENSG00000142409,ENSG00000051523,ENSG00000071539,ENSG00000139613,ENSG00000102125,ENSG00000086102,ENSG00000106462,ENSG00000109854,ENSG00000061273,ENSG00000140564,ENSG00000128917,ENSG00000140464,ENSG00000187045,ENSG00000005436,ENSG00000186827,ENSG00000103056,ENSG00000134283,ENSG00000148737,ENSG00000082898,ENSG00000105298,ENSG00000141968,ENSG00000096384,ENSG00000137497,ENSG00000164687…
GO:0032461	positive regulation of protein oligomerization	biological_process	0.040526	0.73957	4	1033	25	19500	ENSG00000155366,ENSG00000087088,ENSG00000105327,ENSG00000100721
GO:0032880	regulation of protein localization	biological_process	0.040627	0.73957	61	1033	919	19500	ENSG00000142405,ENSG00000184381,ENSG00000146232,ENSG00000070770,ENSG00000187446,ENSG00000102898,ENSG00000186827,ENSG00000105647,ENSG00000117385,ENSG00000072310,ENSG00000039523,ENSG00000166900,ENSG00000105327,ENSG00000157110,ENSG00000100401,ENSG00000197879,ENSG00000163930,ENSG00000186642,ENSG00000122679,ENSG00000142330,ENSG00000116815,ENSG00000079999,ENSG00000140464,ENSG00000068903,ENSG00000171552…
GO:0010939	regulation of necrotic cell death	biological_process	0.040659	0.73957	4	1033	25	19500	ENSG00000129465,ENSG00000100300,ENSG00000125826,ENSG00000137275
GO:0003746	translation elongation factor activity	molecular_function	0.04068	0.73957	4	1033	25	19500	ENSG00000132507,ENSG00000130165,ENSG00000171703,ENSG00000114626
GO:0046856	phosphatidylinositol dephosphorylation	biological_process	0.040775	0.73957	4	1033	25	19500	ENSG00000198825,ENSG00000165782,ENSG00000168918,ENSG00000171100
GO:0071426	ribonucleoprotein complex export from nucleus	biological_process	0.041045	0.73957	12	1033	129	19500	ENSG00000165699,ENSG00000198563,ENSG00000162385,ENSG00000014164,ENSG00000005007,ENSG00000011243,ENSG00000205323,ENSG00000063244,ENSG00000116350,ENSG00000082898,ENSG00000132507,ENSG00000157349
GO:0044764	multi-organism cellular process	biological_process	0.04134	0.73957	48	1033	701	19500	ENSG00000080603,ENSG00000167977,ENSG00000108518,ENSG00000100298,ENSG00000160691,ENSG00000073060,ENSG00000173039,ENSG00000198563,ENSG00000087088,ENSG00000172757,ENSG00000102882,ENSG00000157873,ENSG00000068001,ENSG00000096384,ENSG00000158773,ENSG00000137309,ENSG00000137275,ENSG00000082898,ENSG00000204264,ENSG00000186827,ENSG00000090339,ENSG00000179364,ENSG00000139626,ENSG00000106682,ENSG00000110651…
GO:0031109	microtubule polymerization or depolymerization	biological_process	0.041354	0.73957	10	1033	101	19500	ENSG00000166780,ENSG00000141551,ENSG00000004478,ENSG00000126216,ENSG00000129680,ENSG00000137497,ENSG00000142945,ENSG00000037042,ENSG00000167110,ENSG00000196169
GO:0006979	response to oxidative stress	biological_process	0.041474	0.73957	32	1033	438	19500	ENSG00000204516,ENSG00000140464,ENSG00000068903,ENSG00000211445,ENSG00000074706,ENSG00000079805,ENSG00000051523,ENSG00000106462,ENSG00000131871,ENSG00000011485,ENSG00000157110,ENSG00000054356,ENSG00000120899,ENSG00000157227,ENSG00000133612,ENSG00000137496,ENSG00000170345,ENSG00000173039,ENSG00000102882,ENSG00000132510,ENSG00000110931,ENSG00000184470,ENSG00000068001,ENSG00000127528,ENSG00000172939…
GO:2000779	regulation of double-strand break repair	biological_process	0.04164	0.73957	7	1033	61	19500	ENSG00000167770,ENSG00000116670,ENSG00000013573,ENSG00000140464,ENSG00000077463,ENSG00000168101,ENSG00000149923
GO:0016254	preassembly of GPI anchor in ER membrane	biological_process	0.041739	0.73957	3	1033	15	19500	ENSG00000119227,ENSG00000108474,ENSG00000007541
GO:0010561	negative regulation of glycoprotein biosynthetic process	biological_process	0.04174	0.73957	3	1033	15	19500	ENSG00000275700,ENSG00000105639,ENSG00000135916
GO:1901841	regulation of high voltage-gated calcium channel activity	biological_process	0.041756	0.73957	3	1033	15	19500	ENSG00000166592,ENSG00000139890,ENSG00000160014
GO:0004708	MAP kinase kinase activity	molecular_function	0.041843	0.73957	3	1033	15	19500	ENSG00000114738,ENSG00000102882,ENSG00000034152
[truncated: 7,895 more rows]
